# Supplementary material
Source: publisher figshare collection journal article supplement (https://acs.figshare.com/ndownloader/files/5053642)
Supplement: Supplementary file 1 [file 5053642]

 
data_alplow 
 
_audit_creation_method            SHELXL-97 
_chemical_name_systematic 
; 
 ? 
; 
_chemical_name_common             ? 
_chemical_melting_point           ? 
_chemical_formula_moiety          ? 
_chemical_formula_sum 
 'C846 H1919 N262 O491 S8.83' 
_chemical_formula_weight          23904.63 
 
loop_ 
 _atom_type_symbol 
 _atom_type_description 
 _atom_type_scat_dispersion_real 
 _atom_type_scat_dispersion_imag 
 _atom_type_scat_source 
 'C'  'C'   0.0033   0.0000 
 'International Tables Vol C Tables 4.2.6.8 and 6.1.1.4' 
 'H'  'H'   0.0000   0.0000 
 'International Tables Vol C Tables 4.2.6.8 and 6.1.1.4' 
 'N'  'N'   0.0061   0.0000 
 'International Tables Vol C Tables 4.2.6.8 and 6.1.1.4' 
 'O'  'O'   0.0106   0.0000 
 'International Tables Vol C Tables 4.2.6.8 and 6.1.1.4' 
 'S'  'S'   0.1246   0.0000 
 'International Tables Vol C Tables 4.2.6.8 and 6.1.1.4' 
 
_symmetry_cell_setting            ? 
_symmetry_space_group_name_H-M    ? 
 
loop_ 
 _symmetry_equiv_pos_as_xyz 
 'x, y, z' 
 '-y, x-y, z+2/3' 
 '-x+y, -x, z+1/3' 
 'y, x, -z' 
 'x-y, -y, -z+1/3' 
 '-x, -x+y, -z+2/3' 
 
_cell_length_a                    65.68(7) 
_cell_length_b                    65.68(7) 
_cell_length_c                    79.46(8) 
_cell_angle_alpha                 90.00 
_cell_angle_beta                  90.00 
_cell_angle_gamma                 120.00 
_cell_volume                      296844(515) 
_cell_formula_units_Z             6 
_cell_measurement_temperature     98(2) 
_cell_measurement_reflns_used     ? 
_cell_measurement_theta_min       ? 
_cell_measurement_theta_max       ? 
 
_exptl_crystal_description        ? 
_exptl_crystal_colour             ? 
_exptl_crystal_size_max           ? 
_exptl_crystal_size_mid           ? 
_exptl_crystal_size_min           ? 
_exptl_crystal_density_meas       ? 
_exptl_crystal_density_diffrn     0.802 
_exptl_crystal_density_method     'not measured' 
_exptl_crystal_F_000              77390 
_exptl_absorpt_coefficient_mu     0.074 
_exptl_absorpt_correction_type    ? 
_exptl_absorpt_correction_T_min   ? 
_exptl_absorpt_correction_T_max   ? 
_exptl_absorpt_process_details    ? 
 
_exptl_special_details 
; 
 ? 
; 
 
_diffrn_ambient_temperature       98(2) 
_diffrn_radiation_wavelength      0.78500 
_diffrn_radiation_type            ? 
_diffrn_radiation_source          ? 
_diffrn_radiation_monochromator   ? 
_diffrn_measurement_device_type   ? 
_diffrn_measurement_method        ? 
_diffrn_detector_area_resol_mean  ? 
_diffrn_standards_number          ? 
_diffrn_standards_interval_count  ? 
_diffrn_standards_interval_time   ? 
_diffrn_standards_decay_%         ? 
_diffrn_reflns_number             189104 
_diffrn_reflns_av_R_equivalents   0.0000 
_diffrn_reflns_av_sigmaI/netI     0.0258 
_diffrn_reflns_limit_h_min        0 
_diffrn_reflns_limit_h_max        80 
_diffrn_reflns_limit_k_min        -40 
_diffrn_reflns_limit_k_max        0 
_diffrn_reflns_limit_l_min        -89 
_diffrn_reflns_limit_l_max        88 
_diffrn_reflns_theta_min          1.16 
_diffrn_reflns_theta_max          28.60 
_reflns_number_total              189104 
_reflns_number_gt                 164568 
_reflns_threshold_expression      >2sigma(I) 
 
_computing_data_collection        ? 
_computing_cell_refinement        ? 
_computing_data_reduction         ? 
_computing_structure_solution     '' 
_computing_structure_refinement   'SHELXL-97 (Sheldrick, 1997)' 
_computing_molecular_graphics     ? 
_computing_publication_material   ? 
 
_refine_special_details 
; 
 Refinement of F^2^ against ALL reflections.  The weighted R-factor wR and 
 goodness of fit S are based on F^2^, conventional R-factors R are based 
 on F, with F set to zero for negative F^2^. The threshold expression of 
 F^2^ > 2sigma(F^2^) is used only for calculating R-factors(gt) etc. and is 
 not relevant to the choice of reflections for refinement.  R-factors based 
 on F^2^ are statistically about twice as large as those based on F, and R- 
 factors based on ALL data will be even larger. 
; 
 
_refine_ls_structure_factor_coef  Fsqd  
_refine_ls_matrix_type            fullcycle 
_refine_ls_weighting_scheme       calc  
_refine_ls_weighting_details 
 'calc w=1/[\s^2^(Fo^2^)+(0.1000P)^2^+0.0000P] where P=(Fo^2^+2Fc^2^)/3' 
_atom_sites_solution_primary      direct 
_atom_sites_solution_secondary    difmap 
_atom_sites_solution_hydrogens    geom 
_refine_ls_hydrogen_treatment     mixed 
_refine_ls_extinction_method      none 
_refine_ls_extinction_coef        ? 
_refine_ls_abs_structure_details 
 'Flack H D (1983), Acta Cryst. A39, 876-881' 
_refine_ls_abs_structure_Flack    0(10) 
_refine_ls_number_reflns          189104 
_refine_ls_number_parameters      20529 
_refine_ls_number_restraints      24947 
_refine_ls_R_factor_all           0.0817 
_refine_ls_R_factor_gt            0.0728 
_refine_ls_wR_factor_ref          0.2056 
_refine_ls_wR_factor_gt           0.1999 
_refine_ls_goodness_of_fit_ref    1.691 
_refine_ls_restrained_S_all       1.614 
_refine_ls_shift/su_max           0.000 
_refine_ls_shift/su_mean          0.000 
 
loop_ 
 _atom_site_label 
 _atom_site_type_symbol 
 _atom_site_fract_x 
 _atom_site_fract_y 
 _atom_site_fract_z 
 _atom_site_U_iso_or_equiv 
 _atom_site_adp_type 
 _atom_site_occupancy 
 _atom_site_symmetry_multiplicity 
 _atom_site_calc_flag 
 _atom_site_refinement_flags 
 _atom_site_disorder_assembly 
 _atom_site_disorder_group 
CB_1 C 0.4376 0.2213 0.0872 0.075 Uani 1 1 d U . . 
HB1_1 H 0.4206 0.2149 0.0861 0.113 Uiso 1 1 calc R . . 
HB2_1 H 0.4460 0.2359 0.0808 0.113 Uiso 1 1 calc R . . 
HB3_1 H 0.4421 0.2244 0.0991 0.113 Uiso 1 1 calc R . . 
C_1 C 0.4698 0.2124 0.0834 0.053 Uani 1 1 d U . . 
O_1 O 0.4769 0.2065 0.0959 0.069 Uani 1 1 d U . . 
N_1 N 0.43013(8) 0.18075(7) 0.08886(5) 0.082 Uani 1 1 d U . . 
H0A_1 H 0.4149 0.1739 0.0853 0.123 Uiso 1 1 calc R . . 
H0B_1 H 0.4307 0.1831 0.1002 0.123 Uiso 1 1 calc R . . 
H0C_1 H 0.4361 0.1712 0.0864 0.123 Uiso 1 1 calc R . . 
CA_1 C 0.44402(8) 0.20341(8) 0.08038(5) 0.063 Uani 1 1 d U . . 
HA_1 H 0.4408 0.2013 0.0680 0.075 Uiso 1 1 calc R . . 
N_2 N 0.48433(6) 0.22811(5) 0.07212(3) 0.050 Uani 1 1 d U . . 
H0_2 H 0.4783 0.2310 0.0632 0.061 Uiso 1 1 calc R . . 
CA_2 C 0.50970(7) 0.24055(6) 0.07417(4) 0.049 Uani 1 1 d U . . 
HA_2 H 0.5142 0.2306 0.0809 0.059 Uiso 1 1 calc R . . 
CB_2 C 0.52180(7) 0.24534(7) 0.05708(4) 0.052 Uani 1 1 d U . . 
HB1_2 H 0.5141 0.2511 0.0492 0.063 Uiso 1 1 calc R . . 
HB2_2 H 0.5384 0.2579 0.0583 0.063 Uiso 1 1 calc R . . 
CG_2 C 0.52087(7) 0.22373(7) 0.04978(4) 0.053 Uani 1 1 d U . . 
OD1_2 O 0.50687(6) 0.20382(5) 0.05527(3) 0.065 Uani 1 1 d U . . 
ND2_2 N 0.53586(6) 0.22725(6) 0.03743(3) 0.056 Uani 1 1 d U . . 
HD2A_2 H 0.5361 0.2152 0.0328 0.067 Uiso 1 1 calc R . . 
HD2B_2 H 0.5455 0.2416 0.0339 0.067 Uiso 1 1 calc R . . 
C_2 C 0.51694(7) 0.26325(6) 0.08380(4) 0.051 Uani 1 1 d U . . 
O_2 O 0.51147(7) 0.27784(6) 0.07906(4) 0.080 Uani 1 1 d U . . 
N_3 N 0.53026(5) 0.26662(5) 0.09742(3) 0.042 Uani 1 1 d U . . 
H0_3 H 0.5354 0.2568 0.0994 0.050 Uiso 1 1 calc R . . 
CA_3 C 0.53650(6) 0.28608(6) 0.10909(4) 0.042 Uani 1 1 d U . . 
HA_3 H 0.5251 0.2919 0.1077 0.050 Uiso 1 1 calc R . . 
CB_3 C 0.53534(7) 0.27775(6) 0.12733(4) 0.046 Uani 1 1 d U . . 
HB_3 H 0.5481 0.2737 0.1287 0.055 Uiso 1 1 calc R . . 
CG2_3 C 0.54048(8) 0.29773(7) 0.13949(4) 0.057 Uani 1 1 d U . . 
HG2A_3 H 0.5562 0.3110 0.1373 0.085 Uiso 1 1 calc R . . 
HG2B_3 H 0.5397 0.2923 0.1511 0.085 Uiso 1 1 calc R . . 
HG2C_3 H 0.5288 0.3027 0.1379 0.085 Uiso 1 1 calc R . . 
CG1_3 C 0.51197(7) 0.25557(7) 0.13105(4) 0.056 Uani 1 1 d U . . 
HG1A_3 H 0.5106 0.2428 0.1236 0.067 Uiso 1 1 calc R . . 
HG1B_3 H 0.5124 0.2508 0.1428 0.067 Uiso 1 1 calc R . . 
CD1_3 C 0.49004(8) 0.25749(9) 0.12883(6) 0.067 Uani 1 1 d U . . 
HD1A_3 H 0.4763 0.2430 0.1328 0.101 Uiso 1 1 calc R . . 
HD1B_3 H 0.4880 0.2598 0.1169 0.101 Uiso 1 1 calc R . . 
HD1C_3 H 0.4916 0.2709 0.1353 0.101 Uiso 1 1 calc R . . 
C_3 C 0.56099(6) 0.30577(6) 0.10461(4) 0.044 Uani 1 1 d U . . 
O_3 O 0.57849(5) 0.30381(5) 0.10636(3) 0.057 Uani 1 1 d U . . 
N_4 N 0.56149(5) 0.32494(5) 0.09794(3) 0.044 Uani 1 1 d U . . 
H0_4 H 0.5481 0.3249 0.0974 0.052 Uiso 1 1 calc R . . 
CA_4 C 0.58239(6) 0.34561(6) 0.09149(4) 0.042 Uani 1 1 d U . . 
HA_4 H 0.5967 0.3449 0.0948 0.051 Uiso 1 1 calc R . . 
CB_4 C 0.58123(7) 0.34688(6) 0.07219(4) 0.049 Uani 1 1 d U . . 
HB_4 H 0.5663 0.3466 0.0692 0.059 Uiso 1 1 calc R . . 
CG1_4 C 0.60181(7) 0.36975(7) 0.06543(4) 0.054 Uani 1 1 d U . . 
HG1A_4 H 0.6008 0.3832 0.0698 0.081 Uiso 1 1 calc R . . 
HG1B_4 H 0.6012 0.3697 0.0531 0.081 Uiso 1 1 calc R . . 
HG1C_4 H 0.6167 0.3710 0.0690 0.081 Uiso 1 1 calc R . . 
CG2_4 C 0.58075(9) 0.32554(7) 0.06406(5) 0.065 Uani 1 1 d U . . 
HG2A_4 H 0.5666 0.3112 0.0676 0.097 Uiso 1 1 calc R . . 
HG2B_4 H 0.5947 0.3248 0.0675 0.097 Uiso 1 1 calc R . . 
HG2C_4 H 0.5807 0.3270 0.0518 0.097 Uiso 1 1 calc R . . 
C_4 C 0.58308(6) 0.36707(6) 0.09966(4) 0.038 Uani 1 1 d U . . 
O_4 O 0.56525(4) 0.36877(4) 0.10020(3) 0.045 Uani 1 1 d U . . 
N_5 N 0.60373(5) 0.38338(5) 0.10590(3) 0.040 Uani 1 1 d U . . 
H0_5 H 0.6159 0.3812 0.1057 0.048 Uiso 1 1 calc R . . 
CA_5 C 0.60589(6) 0.40477(6) 0.11306(4) 0.039 Uani 1 1 d U . . 
HA1_5 H 0.6223 0.4152 0.1168 0.047 Uiso 1 1 calc R . . 
HA2_5 H 0.5956 0.4007 0.1231 0.047 Uiso 1 1 calc R . . 
C_5 C 0.59923(5) 0.41784(5) 0.10054(4) 0.038 Uani 1 1 d U . . 
O_5 O 0.60558(4) 0.42013(4) 0.08561(3) 0.045 Uani 1 1 d U . . 
N_6 N 0.58656(5) 0.42677(5) 0.10669(3) 0.037 Uani 1 1 d U . . 
H0_6 H 0.5819 0.4238 0.1172 0.045 Uiso 1 1 calc R . . 
CA_6 C 0.58014(6) 0.44126(6) 0.09682(4) 0.041 Uani 1 1 d U . . 
HA1_6 H 0.5919 0.4488 0.0877 0.049 Uiso 1 1 calc R . . 
HA2_6 H 0.5812 0.4539 0.1041 0.049 Uiso 1 1 calc R . . 
C_6 C 0.55591(6) 0.42856(6) 0.08899(4) 0.042 Uani 1 1 d U . . 
O_6 O 0.54750(5) 0.44028(5) 0.08339(3) 0.056 Uani 1 1 d U . . 
N_7 N 0.54482(5) 0.40528(5) 0.08807(3) 0.042 Uani 1 1 d U . . 
H0_7 H 0.5513 0.3976 0.0925 0.050 Uiso 1 1 calc R . . 
CA_7 C 0.52212(6) 0.39241(6) 0.07979(4) 0.044 Uani 1 1 d U . . 
HA_7 H 0.5228 0.4014 0.0694 0.053 Uiso 1 1 calc R . . 
CB_7 C 0.51650(6) 0.36776(6) 0.07418(4) 0.047 Uani 1 1 d U . . 
HB_7 H 0.5019 0.3612 0.0672 0.057 Uiso 1 1 calc R . . 
CG2_7 C 0.53609(8) 0.36954(8) 0.06275(5) 0.059 Uani 1 1 d U . . 
HG2A_7 H 0.5307 0.3545 0.0571 0.088 Uiso 1 1 calc R . . 
HG2B_7 H 0.5500 0.3734 0.0695 0.088 Uiso 1 1 calc R . . 
HG2C_7 H 0.5400 0.3819 0.0543 0.088 Uiso 1 1 calc R . . 
CG1_7 C 0.51102(6) 0.35101(6) 0.08902(4) 0.047 Uani 1 1 d U . . 
HG1A_7 H 0.5246 0.3579 0.0968 0.057 Uiso 1 1 calc R . . 
HG1B_7 H 0.4974 0.3498 0.0952 0.057 Uiso 1 1 calc R . . 
CD1_7 C 0.50564(8) 0.32645(7) 0.08429(6) 0.062 Uani 1 1 d U . . 
HD1A_7 H 0.5035 0.3173 0.0945 0.092 Uiso 1 1 calc R . . 
HD1B_7 H 0.5187 0.3274 0.0777 0.092 Uiso 1 1 calc R . . 
HD1C_7 H 0.4912 0.3188 0.0775 0.092 Uiso 1 1 calc R . . 
C_7 C 0.50283(6) 0.39145(6) 0.09101(4) 0.039 Uani 1 1 d U . . 
O_7 O 0.50432(4) 0.39285(4) 0.10649(3) 0.043 Uani 1 1 d U . . 
N_8 N 0.48344(5) 0.38777(5) 0.08286(3) 0.045 Uani 1 1 d U . . 
H0_8 H 0.4830 0.3867 0.0718 0.054 Uiso 1 1 calc R . . 
CA_8 C 0.46318(6) 0.38557(6) 0.09158(4) 0.044 Uani 1 1 d U . . 
HA_8 H 0.4682 0.3992 0.0994 0.053 Uiso 1 1 calc R . . 
CB_8 C 0.44617(7) 0.38591(7) 0.07829(5) 0.052 Uani 1 1 d U . . 
HB1_8 H 0.4546 0.4008 0.0718 0.062 Uiso 1 1 calc R . . 
HB2_8 H 0.4420 0.3728 0.0703 0.062 Uiso 1 1 calc R . . 
CG_8 C 0.42373(8) 0.38381(9) 0.08517(6) 0.066 Uani 1 1 d U . . 
HG1_8 H 0.4142 0.3682 0.0905 0.079 Uiso 1 1 calc R . . 
HG2_8 H 0.4276 0.3959 0.0939 0.079 Uiso 1 1 calc R . . 
CD_8 C 0.40975(9) 0.38673(10) 0.07167(7) 0.081 Uani 1 1 d U . . 
OE1_8 O 0.38995(8) 0.37032(9) 0.06803(7) 0.126 Uani 1 1 d U . . 
OE2_8 O 0.41939(8) 0.40614(9) 0.06375(6) 0.107 Uani 1 1 d U . . 
C_8 C 0.45006(6) 0.36265(6) 0.10143(4) 0.046 Uani 1 1 d U . . 
O_8 O 0.44678(5) 0.34384(5) 0.09531(3) 0.057 Uani 1 1 d U . . 
N_9 N 0.44066(5) 0.36403(5) 0.11574(3) 0.044 Uani 1 1 d U . . 
H0_9 H 0.4458 0.3779 0.1205 0.053 Uiso 1 1 calc R . . 
CA_9 C 0.42192(6) 0.34317(6) 0.12391(4) 0.045 Uani 1 1 d U . . 
HA_9 H 0.4135 0.3308 0.1151 0.054 Uiso 1 1 calc R . . 
CB_9 C 0.43121(6) 0.33306(6) 0.13744(4) 0.046 Uani 1 1 d U . . 
HB1_9 H 0.4182 0.3174 0.1409 0.056 Uiso 1 1 calc R . . 
HB2_9 H 0.4436 0.3307 0.1324 0.056 Uiso 1 1 calc R . . 
CG_9 C 0.44101(6) 0.34791(6) 0.15289(4) 0.044 Uani 1 1 d U . . 
CD1_9 C 0.42802(6) 0.34242(7) 0.16759(4) 0.048 Uani 1 1 d U . . 
HD1_9 H 0.4127 0.3290 0.1678 0.057 Uiso 1 1 calc R . . 
CE1_9 C 0.43694(6) 0.35604(7) 0.18196(4) 0.049 Uani 1 1 d U . . 
HE1_9 H 0.4279 0.3518 0.1920 0.059 Uiso 1 1 calc R . . 
CD2_9 C 0.46353(6) 0.36756(6) 0.15296(4) 0.047 Uani 1 1 d U . . 
HD2_9 H 0.4729 0.3715 0.1431 0.057 Uiso 1 1 calc R . . 
CE2_9 C 0.47244(6) 0.38146(6) 0.16724(4) 0.045 Uani 1 1 d U . . 
HE2_9 H 0.4878 0.3949 0.1671 0.054 Uiso 1 1 calc R . . 
CZ_9 C 0.45901(6) 0.37580(6) 0.18167(4) 0.045 Uani 1 1 d U . . 
OH_9 O 0.46649(5) 0.38935(5) 0.19601(3) 0.052 Uani 1 1 d U . . 
HH_9 H 0.4805 0.4000 0.1948 0.078 Uiso 1 1 calc R . . 
C_9 C 0.40470(6) 0.35001(6) 0.13136(4) 0.045 Uani 1 1 d U . . 
O_9 O 0.41106(4) 0.37080(4) 0.13458(3) 0.052 Uani 1 1 d U . . 
N_10 N 0.38281(5) 0.33238(5) 0.13393(4) 0.048 Uani 1 1 d U . . 
H0_10 H 0.3789 0.3181 0.1307 0.058 Uiso 1 1 calc R . . 
CA_10 C 0.36529(6) 0.33636(7) 0.14199(4) 0.050 Uani 1 1 d U . . 
HA_10 H 0.3719 0.3537 0.1429 0.060 Uiso 1 1 calc R . . 
CB_10 C 0.34245(7) 0.32623(8) 0.13210(5) 0.060 Uani 1 1 d U . . 
HB1_10 H 0.3323 0.3320 0.1369 0.073 Uiso 1 1 calc R . . 
HB2_10 H 0.3458 0.3313 0.1202 0.073 Uiso 1 1 calc R . . 
OG_10 O 0.33068(5) 0.30106(6) 0.13305(4) 0.070 Uani 1 1 d U . . 
HG_10 H 0.3168 0.2954 0.1295 0.105 Uiso 1 1 calc R . . 
C_10 C 0.36029(6) 0.32613(7) 0.15982(4) 0.049 Uani 1 1 d U . . 
O_10 O 0.36375(4) 0.30996(5) 0.16388(3) 0.053 Uani 1 1 d U . . 
N_11 N 0.35112(5) 0.33557(6) 0.17012(4) 0.049 Uani 1 1 d U . . 
H0_11 H 0.3480 0.3462 0.1660 0.058 Uiso 1 1 calc R . . 
CA_11 C 0.34603(6) 0.32917(7) 0.18781(4) 0.048 Uani 1 1 d U . . 
HA_11 H 0.3491 0.3160 0.1902 0.057 Uiso 1 1 calc R . . 
CB_11 C 0.36147(7) 0.34984(7) 0.19953(5) 0.052 Uani 1 1 d U . . 
HB_11 H 0.3577 0.3626 0.1975 0.063 Uiso 1 1 calc R . . 
CG2_11 C 0.35547(8) 0.34199(9) 0.21764(5) 0.065 Uani 1 1 d U . . 
HG2A_11 H 0.3647 0.3554 0.2251 0.097 Uiso 1 1 calc R . . 
HG2B_11 H 0.3592 0.3295 0.2200 0.097 Uiso 1 1 calc R . . 
HG2C_11 H 0.3387 0.3360 0.2195 0.097 Uiso 1 1 calc R . . 
CG1_11 C 0.38769(6) 0.35973(7) 0.19578(5) 0.053 Uani 1 1 d U . . 
HG1A_11 H 0.3963 0.3638 0.2066 0.063 Uiso 1 1 calc R . . 
HG1B_11 H 0.3896 0.3471 0.1905 0.063 Uiso 1 1 calc R . . 
CD1_11 C 0.39928(7) 0.38132(8) 0.18432(5) 0.060 Uani 1 1 d U . . 
HD1A_11 H 0.4158 0.3859 0.1825 0.089 Uiso 1 1 calc R . . 
HD1B_11 H 0.3984 0.3943 0.1896 0.089 Uiso 1 1 calc R . . 
HD1C_11 H 0.3911 0.3775 0.1735 0.089 Uiso 1 1 calc R . . 
C_11 C 0.32002(6) 0.32048(7) 0.19080(5) 0.053 Uani 1 1 d U . . 
O_11 O 0.31182(5) 0.33349(5) 0.18817(4) 0.062 Uani 1 1 d U . . 
N_12 N 0.30684(5) 0.29834(6) 0.19588(4) 0.058 Uani 1 1 d U . . 
H0_12 H 0.3137 0.2900 0.1977 0.070 Uiso 1 1 calc R . . 
CA_12 C 0.28128(7) 0.28718(10) 0.19865(6) 0.070 Uani 1 1 d U . . 
HA_12 H 0.2751 0.2699 0.1994 0.084 Uiso 1 1 calc R . . 
CB_12 C 0.27567(10) 0.29452(12) 0.21538(6) 0.085 Uani 1 1 d U . . 
HB1_12 H 0.2845 0.3119 0.2162 0.102 Uiso 1 1 calc R . . 
HB2_12 H 0.2587 0.2893 0.2158 0.102 Uiso 1 1 calc R . . 
CG_12 C 0.28176(10) 0.28425(14) 0.23029(7) 0.097 Uani 1 1 d U . . 
OD1_12 O 0.28235(8) 0.26583(10) 0.22956(6) 0.109 Uani 1 1 d U . . 
ND2_12 N 0.28455(15) 0.29563(18) 0.24415(8) 0.154 Uani 1 1 d U . . 
HD2A_12 H 0.2870 0.2903 0.2536 0.185 Uiso 1 1 calc R . . 
HD2B_12 H 0.2840 0.3087 0.2441 0.185 Uiso 1 1 calc R . . 
C_12 C 0.26896(7) 0.29097(8) 0.18407(6) 0.065 Uani 1 1 d U . . 
O_12 O 0.25227(5) 0.29448(6) 0.18574(4) 0.074 Uani 1 1 d U . . 
N_13 N 0.27664(6) 0.28931(6) 0.16856(5) 0.064 Uani 1 1 d U . . 
H0_13 H 0.2887 0.2871 0.1677 0.077 Uiso 1 1 calc R . . 
CA_13 C 0.26534(7) 0.29114(8) 0.15340(6) 0.068 Uani 1 1 d U . . 
HA_13 H 0.2743 0.2898 0.1437 0.082 Uiso 1 1 calc R . . 
CB_13 C 0.23983(8) 0.27040(10) 0.15168(7) 0.081 Uani 1 1 d U . . 
HB1_13 H 0.2335 0.2644 0.1631 0.097 Uiso 1 1 calc R . . 
HB2_13 H 0.2300 0.2763 0.1466 0.097 Uiso 1 1 calc R . . 
CG_13 C 0.23769(9) 0.25062(11) 0.14133(9) 0.092 Uani 1 1 d U . . 
OD1_13 O 0.25106(8) 0.25469(9) 0.12888(7) 0.118 Uani 1 1 d U . . 
ND2_13 N 0.22104(10) 0.22997(10) 0.14482(12) 0.139 Uani 1 1 d U . . 
HD2A_13 H 0.2186 0.2180 0.1384 0.167 Uiso 1 1 calc R . . 
HD2B_13 H 0.2120 0.2277 0.1536 0.167 Uiso 1 1 calc R . . 
C_13 C 0.26658(7) 0.31475(8) 0.15156(6) 0.066 Uani 1 1 d U . . 
O_13 O 0.25252(5) 0.31669(6) 0.14239(4) 0.078 Uani 1 1 d U . . 
N_14 N 0.28430(6) 0.33304(7) 0.15922(5) 0.067 Uani 1 1 d U . . 
H0_14 H 0.2960 0.3317 0.1633 0.081 Uiso 1 1 calc R . . 
CA_14 C 0.28465(7) 0.35522(8) 0.16104(7) 0.073 Uani 1 1 d U . . 
HA_14 H 0.2735 0.3552 0.1525 0.088 Uiso 1 1 calc R . . 
CB_14 C 0.27546(8) 0.35688(10) 0.17790(8) 0.088 Uani 1 1 d U . . 
HB1_14 H 0.2593 0.3438 0.1793 0.132 Uiso 1 1 calc R . . 
HB2_14 H 0.2756 0.3718 0.1788 0.132 Uiso 1 1 calc R . . 
HB3_14 H 0.2854 0.3561 0.1867 0.132 Uiso 1 1 calc R . . 
C_14 C 0.30917(7) 0.37542(8) 0.15638(6) 0.064 Uani 1 1 d U . . 
O_14 O 0.31401(6) 0.38205(6) 0.14154(4) 0.074 Uani 1 1 d U . . 
N_15 N 0.32447(5) 0.38625(6) 0.16829(5) 0.060 Uani 1 1 d U . . 
H0_15 H 0.3208 0.3814 0.1788 0.072 Uiso 1 1 calc R . . 
CA_15 C 0.34734(7) 0.40610(7) 0.16454(5) 0.056 Uani 1 1 d U . . 
HA_15 H 0.3452 0.4178 0.1578 0.067 Uiso 1 1 calc R . . 
CB_15 C 0.36040(7) 0.41784(9) 0.18078(6) 0.067 Uani 1 1 d U . . 
HB1_15 H 0.3608 0.4059 0.1882 0.080 Uiso 1 1 calc R . . 
HB2_15 H 0.3768 0.4298 0.1781 0.080 Uiso 1 1 calc R . . 
OG_15 O 0.34919(6) 0.42862(6) 0.18924(4) 0.076 Uani 1 1 d U . . 
HG_15 H 0.3358 0.4182 0.1926 0.114 Uiso 1 1 calc R . . 
C_15 C 0.36230(6) 0.39868(7) 0.15436(5) 0.051 Uani 1 1 d U B . 
O_15 O 0.35914(5) 0.37876(5) 0.15472(4) 0.060 Uani 1 1 d U . . 
N_16 N 0.37964(5) 0.41653(6) 0.14584(4) 0.055 Uani 1 1 d U . . 
H0_16 H 0.3806 0.4304 0.1460 0.066 Uiso 1 1 calc R A 1 
CA_16 C 0.3973(2) 0.4135(2) 0.13605(17) 0.065 Uani 0.75 1 d PDU B 1 
HA_16 H 0.3937 0.3968 0.1363 0.078 Uiso 0.75 1 calc PR B 1 
CA_16 C 0.3976(6) 0.4153(6) 0.1374(5) 0.055 Uani 0.25 1 d PDU B 2 
HA1_16 H 0.3938 0.3986 0.1379 0.066 Uiso 0.25 1 calc PR B 2 
CB_16 C 0.39869(13) 0.42183(13) 0.11837(7) 0.100 Uani 1 1 d U . . 
HB1_16 H 0.4115 0.4210 0.1125 0.120 Uiso 1 1 calc R B 1 
HB2_16 H 0.4027 0.4385 0.1185 0.120 Uiso 1 1 calc R B 1 
CG_16 C 0.37597(16) 0.40759(17) 0.10857(7) 0.121 Uani 1 1 d U B . 
HG_16 H 0.3637 0.4100 0.1142 0.146 Uiso 1 1 calc R . . 
CD1_16 C 0.3785(3) 0.4168(2) 0.09094(9) 0.194 Uani 1 1 d U . . 
HD1A_16 H 0.3634 0.4081 0.0851 0.290 Uiso 1 1 calc R B . 
HD1B_16 H 0.3904 0.4146 0.0849 0.290 Uiso 1 1 calc R . . 
HD1C_16 H 0.3834 0.4335 0.0913 0.290 Uiso 1 1 calc R . . 
CD2_16 C 0.36725(14) 0.38154(16) 0.10877(8) 0.116 Uani 1 1 d U . . 
HD2A_16 H 0.3517 0.3731 0.1034 0.174 Uiso 1 1 calc R B . 
HD2B_16 H 0.3661 0.3762 0.1204 0.174 Uiso 1 1 calc R . . 
HD2C_16 H 0.3783 0.3784 0.1026 0.174 Uiso 1 1 calc R . . 
C_16 C 0.4217(3) 0.4302(3) 0.14411(19) 0.077 Uani 0.75 1 d PDU B 1 
C_16 C 0.4215(6) 0.4302(8) 0.1458(5) 0.064 Uani 0.25 1 d PDU B 2 
O_16 O 0.42752(10) 0.45044(12) 0.14609(15) 0.164 Uani 0.75 1 d PDU B 1 
O_16 O 0.4281(2) 0.4494(2) 0.15329(12) 0.050 Uani 0.25 1 d PDU B 2 
N_17 N 0.43546(5) 0.42105(6) 0.14548(4) 0.052 Uani 1 1 d DU . . 
H0_17 H 0.4296 0.4060 0.1431 0.063 Uiso 1 1 calc R B 1 
C_17 C 0.47391(5) 0.42688(5) 0.13964(4) 0.039 Uani 1 1 d DU . . 
O_17 O 0.46467(4) 0.41285(4) 0.12803(3) 0.045 Uani 1 1 d DU B . 
CA_17 C 0.45986(11) 0.43447(11) 0.15067(9) 0.049 Uani 0.75 1 d PDU B 1 
HA_17 H 0.4656 0.4515 0.1485 0.059 Uiso 0.75 1 calc PR B 1 
CA_17 C 0.4600(3) 0.4352(3) 0.1499(3) 0.058 Uani 0.19 1 d PDU B 2 
HA1_17 H 0.4655 0.4521 0.1472 0.069 Uiso 0.19 1 calc PR B 2 
CA_17 C 0.4597(3) 0.4334(4) 0.1513(3) 0.046 Uani 0.06 1 d PDU B 3 
HA1_17 H 0.4659 0.4507 0.1504 0.055 Uiso 0.06 1 calc PR B 3 
CB_17 C 0.46228(18) 0.4311(2) 0.16986(9) 0.068 Uani 0.75 1 d PDU B 1 
HB1_17 H 0.4782 0.4336 0.1720 0.081 Uiso 0.75 1 calc PR B 1 
HB2_17 H 0.4508 0.4147 0.1729 0.081 Uiso 0.75 1 calc PR B 1 
CB_17 C 0.4641(3) 0.4332(4) 0.1686(2) 0.042 Uani 0.19 1 d PDU B 2 
HB3_17 H 0.4808 0.4434 0.1717 0.050 Uiso 0.19 1 calc PR B 2 
HB4_17 H 0.4588 0.4168 0.1719 0.050 Uiso 0.19 1 calc PR B 2 
CB_17 C 0.4630(10) 0.4275(10) 0.1694(4) 0.035 Uani 0.06 1 d PDU B 3 
HB3_17 H 0.4623 0.4122 0.1680 0.042 Uiso 0.06 1 calc PR B 3 
HB4_17 H 0.4479 0.4237 0.1747 0.042 Uiso 0.06 1 calc PR B 3 
SG_17 S 0.45782(3) 0.45011(3) 0.183484(16) 0.059 Uani 0.75 1 d PDU B 1 
SG1_17 S 0.44347(15) 0.44482(15) 0.17870(7) 0.084 Uani 0.19 1 d PDU B 2 
SG1_17 S 0.4805(5) 0.4386(7) 0.1839(4) 0.109 Uani 0.06 1 d PU B 3 
N_18 N 0.49655(5) 0.43659(5) 0.14379(3) 0.038 Uani 1 1 d DU B . 
H0_18 H 0.5018 0.4461 0.1525 0.045 Uiso 1 1 calc R . . 
CA_18 C 0.51287(5) 0.43200(5) 0.13437(4) 0.036 Uani 1 1 d U . . 
HA_18 H 0.5043 0.4209 0.1249 0.043 Uiso 1 1 calc R B . 
CB_18 C 0.53238(6) 0.45510(6) 0.12720(4) 0.041 Uani 1 1 d U B . 
HB1_18 H 0.5409 0.4660 0.1366 0.049 Uiso 1 1 calc R . . 
HB2_18 H 0.5437 0.4521 0.1210 0.049 Uiso 1 1 calc R . . 
OG_18 O 0.52325(4) 0.46580(4) 0.11612(3) 0.044 Uani 1 1 d U . . 
HG_18 H 0.5155 0.4705 0.1217 0.066 Uiso 1 1 calc R B . 
C_18 C 0.52333(5) 0.42097(5) 0.14601(4) 0.035 Uani 1 1 d U B . 
O_18 O 0.52802(4) 0.42679(4) 0.16087(2) 0.040 Uani 1 1 d U . . 
N_19 N 0.52715(4) 0.40469(4) 0.13870(3) 0.036 Uani 1 1 d U . . 
H0_19 H 0.5227 0.4006 0.1282 0.043 Uiso 1 1 calc R B . 
CA_19 C 0.53842(5) 0.39370(5) 0.14770(3) 0.034 Uani 1 1 d U B . 
HA_19 H 0.5299 0.3871 0.1585 0.040 Uiso 1 1 calc R . . 
CB_19 C 0.53718(6) 0.37356(5) 0.13692(3) 0.037 Uani 1 1 d U . . 
HB_19 H 0.5435 0.3800 0.1255 0.044 Uiso 1 1 calc R B . 
CG1_19 C 0.55188(7) 0.36370(6) 0.14418(4) 0.044 Uani 1 1 d U B . 
HG1A_19 H 0.5683 0.3763 0.1450 0.066 Uiso 1 1 calc R . . 
HG1B_19 H 0.5508 0.3512 0.1368 0.066 Uiso 1 1 calc R . . 
HG1C_19 H 0.5460 0.3573 0.1554 0.066 Uiso 1 1 calc R . . 
CG2_19 C 0.51162(6) 0.35399(6) 0.13493(4) 0.045 Uani 1 1 d U B . 
HG2A_19 H 0.5024 0.3604 0.1299 0.068 Uiso 1 1 calc R . . 
HG2B_19 H 0.5051 0.3473 0.1460 0.068 Uiso 1 1 calc R . . 
HG2C_19 H 0.5109 0.3417 0.1276 0.068 Uiso 1 1 calc R . . 
C_19 C 0.56376(5) 0.41193(5) 0.15151(3) 0.032 Uani 1 1 d U . . 
O_19 O 0.57649(4) 0.42619(4) 0.14072(2) 0.035 Uani 1 1 d U B . 
N_20 N 0.57214(4) 0.41083(4) 0.16668(3) 0.032 Uani 1 1 d U B . 
H0_20 H 0.5625 0.4006 0.1741 0.039 Uiso 1 1 calc R . . 
CA_20 C 0.59676(5) 0.42606(5) 0.17121(3) 0.033 Uani 1 1 d U . . 
HA1_20 H 0.5981 0.4284 0.1835 0.040 Uiso 1 1 calc R B . 
HA2_20 H 0.6028 0.4416 0.1658 0.040 Uiso 1 1 calc R . . 
C_20 C 0.61153(5) 0.41535(5) 0.16567(3) 0.032 Uani 1 1 d U B . 
O_20 O 0.62362(4) 0.42184(4) 0.15282(2) 0.038 Uani 1 1 d U . . 
N_21 N 0.61049(4) 0.39809(4) 0.17534(3) 0.033 Uani 1 1 d U . . 
H0_21 H 0.6015 0.3936 0.1843 0.039 Uiso 1 1 calc R B . 
CA_21 C 0.62392(5) 0.38663(5) 0.17132(3) 0.032 Uani 1 1 d U B . 
HA_21 H 0.6264 0.3872 0.1589 0.038 Uiso 1 1 calc R . . 
CB_21 C 0.64816(5) 0.39811(6) 0.18025(4) 0.038 Uani 1 1 d U . . 
HB1_21 H 0.6456 0.3963 0.1926 0.045 Uiso 1 1 calc R B . 
HB2_21 H 0.6565 0.3897 0.1769 0.045 Uiso 1 1 calc R . . 
CG_21 C 0.66322(5) 0.42356(5) 0.17622(3) 0.035 Uani 1 1 d U B . 
CD1_21 C 0.67655(6) 0.43056(6) 0.16149(4) 0.042 Uani 1 1 d U . . 
HD1_21 H 0.6765 0.4191 0.1542 0.050 Uiso 1 1 calc R B . 
CD2_21 C 0.66393(6) 0.44084(6) 0.18677(4) 0.042 Uani 1 1 d U . . 
HD2_21 H 0.6552 0.4364 0.1970 0.051 Uiso 1 1 calc R B . 
CE1_21 C 0.68977(6) 0.45414(7) 0.15737(4) 0.049 Uani 1 1 d U B . 
HE1_21 H 0.6987 0.4588 0.1473 0.058 Uiso 1 1 calc R . . 
CE2_21 C 0.67716(6) 0.46431(6) 0.18250(5) 0.048 Uani 1 1 d U B . 
HE2_21 H 0.6773 0.4759 0.1898 0.058 Uiso 1 1 calc R . . 
CZ_21 C 0.69000(6) 0.47108(6) 0.16793(5) 0.051 Uani 1 1 d U . . 
HZ_21 H 0.6990 0.4873 0.1651 0.062 Uiso 1 1 calc R B . 
C_21 C 0.61089(5) 0.36112(5) 0.17698(3) 0.033 Uani 1 1 d U . . 
O_21 O 0.60024(4) 0.35553(4) 0.19064(2) 0.038 Uani 1 1 d U B . 
N_22 N 0.61336(4) 0.34618(4) 0.16715(3) 0.034 Uani 1 1 d U B . 
H0_22 H 0.6198 0.3510 0.1572 0.040 Uiso 1 1 calc R . . 
CA_22 C 0.60588(5) 0.32211(5) 0.17211(3) 0.033 Uani 1 1 d U . . 
HA_22 H 0.5887 0.3135 0.1749 0.040 Uiso 1 1 calc R B . 
CB_22 C 0.61084(6) 0.30983(6) 0.15744(3) 0.041 Uani 1 1 d U B . 
HB1_22 H 0.6276 0.3191 0.1542 0.049 Uiso 1 1 calc R . . 
HB2_22 H 0.6076 0.2941 0.1611 0.049 Uiso 1 1 calc R . . 
OG_22 O 0.59661(5) 0.30757(6) 0.14356(3) 0.062 Uani 1 1 d U . . 
HG_22 H 0.6050 0.3129 0.1349 0.094 Uiso 1 1 calc R B . 
C_22 C 0.62026(5) 0.32200(5) 0.18745(3) 0.033 Uani 1 1 d U B . 
O_22 O 0.64200(4) 0.33446(4) 0.18754(2) 0.039 Uani 1 1 d U . . 
N_23 N 0.60765(4) 0.30690(4) 0.19960(3) 0.033 Uani 1 1 d U . . 
H0_23 H 0.5923 0.2982 0.1983 0.040 Uiso 1 1 calc R B . 
CA_23 C 0.61822(5) 0.30427(5) 0.21500(3) 0.035 Uani 1 1 d U B . 
HA_23 H 0.6351 0.3094 0.2128 0.042 Uiso 1 1 calc R . . 
CB_23 C 0.61659(6) 0.31876(6) 0.22983(3) 0.040 Uani 1 1 d U . . 
HB_23 H 0.6234 0.3154 0.2400 0.048 Uiso 1 1 calc R B . 
CG1_23 C 0.63138(7) 0.34517(6) 0.22626(4) 0.048 Uani 1 1 d U B . 
HG1A_23 H 0.6477 0.3493 0.2240 0.072 Uiso 1 1 calc R . . 
HG1B_23 H 0.6310 0.3540 0.2361 0.072 Uiso 1 1 calc R . . 
HG1C_23 H 0.6250 0.3491 0.2165 0.072 Uiso 1 1 calc R . . 
CG2_23 C 0.59133(6) 0.31174(7) 0.23395(4) 0.048 Uani 1 1 d U B . 
HG2A_23 H 0.5822 0.2947 0.2359 0.072 Uiso 1 1 calc R . . 
HG2B_23 H 0.5845 0.3159 0.2245 0.072 Uiso 1 1 calc R . . 
HG2C_23 H 0.5910 0.3201 0.2441 0.072 Uiso 1 1 calc R . . 
C_23 C 0.60522(6) 0.27821(6) 0.21995(3) 0.037 Uani 1 1 d U . . 
O_23 O 0.58552(4) 0.26447(4) 0.21451(3) 0.045 Uani 1 1 d U B . 
N_24 N 0.61659(5) 0.27223(5) 0.23128(3) 0.044 Uani 1 1 d U B . 
H0_24 H 0.6314 0.2822 0.2336 0.053 Uiso 1 1 calc R . . 
CA_24 C 0.60476(7) 0.24968(6) 0.23972(4) 0.049 Uani 1 1 d DU . . 
HA_24 H 0.5879 0.2410 0.2362 0.059 Uiso 1 1 calc R B . 
CB_24 C 0.61600(9) 0.23462(8) 0.23551(5) 0.066 Uani 1 1 d U B . 
HB_24 H 0.6073 0.2194 0.2418 0.080 Uiso 1 1 calc R . . 
OG1_24 O 0.63983(6) 0.24634(6) 0.24094(4) 0.074 Uani 1 1 d U . . 
HG1_24 H 0.6480 0.2575 0.2343 0.111 Uiso 1 1 calc R B . 
CG2_24 C 0.61454(12) 0.22923(10) 0.21692(6) 0.084 Uani 1 1 d U . . 
HG2A_24 H 0.6228 0.2205 0.2146 0.126 Uiso 1 1 calc R B . 
HG2B_24 H 0.6219 0.2440 0.2105 0.126 Uiso 1 1 calc R . . 
HG2C_24 H 0.5980 0.2197 0.2136 0.126 Uiso 1 1 calc R . . 
C_24 C 0.60619(7) 0.25378(6) 0.25889(4) 0.049 Uani 1 1 d DU B . 
O_24 O 0.62171(5) 0.27138(4) 0.26556(3) 0.054 Uani 1 1 d DU . . 
N_25 N 0.58889(14) 0.23509(9) 0.26694(6) 0.060 Uani 0.74 1 d PDU B 1 
H0_25 H 0.5780 0.2234 0.2610 0.072 Uiso 0.74 1 calc PR B 1 
N_25 N 0.5898(3) 0.2373(3) 0.26820(17) 0.067 Uani 0.26 1 d PDU B 2 
H0A_25 H 0.5776 0.2261 0.2629 0.081 Uiso 0.26 1 calc PR B 2 
CA_25 C 0.58787(15) 0.23378(13) 0.28540(8) 0.062 Uani 0.74 1 d PDU B 1 
HA_25 H 0.6037 0.2454 0.2900 0.075 Uiso 0.74 1 calc PR B 1 
CA_25 C 0.5896(2) 0.2357(3) 0.28642(19) 0.045 Uani 0.26 1 d PDU B 2 
HA1_25 H 0.6057 0.2471 0.2908 0.055 Uiso 0.26 1 calc PR B 2 
CB_25 C 0.57019(16) 0.23952(16) 0.29226(7) 0.066 Uani 0.74 1 d PDU B 1 
HB1_25 H 0.5542 0.2260 0.2904 0.080 Uiso 0.74 1 calc PR B 1 
HB2_25 H 0.5715 0.2533 0.2862 0.080 Uiso 0.74 1 calc PR B 1 
CB_25 C 0.5718(3) 0.2409(3) 0.29473(18) 0.047 Uani 0.26 1 d PDU B 2 
HB3_25 H 0.5557 0.2285 0.2916 0.057 Uiso 0.26 1 calc PR B 2 
HB4_25 H 0.5741 0.2561 0.2904 0.057 Uiso 0.26 1 calc PR B 2 
CG_25 C 0.57400(10) 0.24519(11) 0.31166(6) 0.048 Uani 0.74 1 d PDU B 1 
HG1_25 H 0.5734 0.2318 0.3178 0.058 Uiso 0.74 1 calc PR B 1 
HG2_25 H 0.5895 0.2593 0.3136 0.058 Uiso 0.74 1 calc PR B 1 
CG_25 C 0.5737(6) 0.2422(7) 0.3139(2) 0.124 Uani 0.26 1 d PDU B 2 
HG3_25 H 0.5729 0.2274 0.3175 0.149 Uiso 0.26 1 calc PR B 2 
HG4_25 H 0.5899 0.2550 0.3165 0.149 Uiso 0.26 1 calc PR B 2 
CD_25 C 0.55469(9) 0.24944(9) 0.31770(6) 0.050 Uani 0.74 1 d PDU B 1 
HD1_25 H 0.5550 0.2622 0.3109 0.060 Uiso 0.74 1 calc PR B 1 
HD2_25 H 0.5394 0.2350 0.3158 0.060 Uiso 0.74 1 calc PR B 1 
CD_25 C 0.5576(4) 0.2457(4) 0.3253(3) 0.116 Uani 0.26 1 d PDU B 2 
HD3_25 H 0.5648 0.2505 0.3366 0.139 Uiso 0.26 1 calc PR B 2 
HD4_25 H 0.5554 0.2585 0.3208 0.139 Uiso 0.26 1 calc PR B 2 
NE_25 N 0.55645(7) 0.25577(7) 0.33539(5) 0.051 Uani 0.74 1 d PDU B 1 
HE_25 H 0.5648 0.2708 0.3379 0.061 Uiso 0.74 1 calc PR B 1 
NE_25 N 0.5352(3) 0.2249(4) 0.3268(2) 0.115 Uani 0.26 1 d PDU B 2 
HE1_25 H 0.5336 0.2127 0.3211 0.138 Uiso 0.26 1 calc PR B 2 
CZ_25 C 0.54665(8) 0.24107(8) 0.34799(6) 0.050 Uani 0.74 1 d PDU B 1 
CZ_25 C 0.5169(4) 0.2213(4) 0.3355(3) 0.159 Uani 0.26 1 d PDU B 2 
NH1_25 N 0.54912(9) 0.25015(9) 0.36348(5) 0.063 Uani 0.74 1 d PDU B 1 
HH1A_25 H 0.5571 0.2655 0.3649 0.075 Uiso 0.74 1 calc PR B 1 
HH1B_25 H 0.5428 0.2408 0.3722 0.075 Uiso 0.74 1 calc PR B 1 
NH1_25 N 0.4980(5) 0.2003(4) 0.3348(4) 0.186 Uani 0.26 1 d PDU B 2 
HH1C_25 H 0.4981 0.1892 0.3286 0.223 Uiso 0.26 1 calc PR B 2 
HH1D_25 H 0.4854 0.1973 0.3405 0.223 Uiso 0.26 1 calc PR B 2 
NH2_25 N 0.53465(8) 0.21806(7) 0.34571(5) 0.055 Uani 0.74 1 d PDU B 1 
HH2A_25 H 0.5330 0.2122 0.3355 0.066 Uiso 0.74 1 calc PR B 1 
HH2B_25 H 0.5283 0.2086 0.3544 0.066 Uiso 0.74 1 calc PR B 1 
NH2_25 N 0.5180(7) 0.2389(5) 0.3448(5) 0.204 Uani 0.26 1 d PDU B 2 
HH2C_25 H 0.5309 0.2526 0.3449 0.245 Uiso 0.26 1 calc PR B 2 
HH2D_25 H 0.5057 0.2366 0.3507 0.245 Uiso 0.26 1 calc PR B 2 
C_25 C 0.58288(14) 0.20889(13) 0.28956(8) 0.062 Uani 0.74 1 d PDU B 1 
C_25 C 0.5839(3) 0.2107(2) 0.29056(19) 0.051 Uani 0.26 1 d PDU B 2 
O_25 O 0.56239(12) 0.19270(11) 0.29051(7) 0.059 Uani 0.74 1 d PDU B 1 
O_25 O 0.5633(3) 0.1947(3) 0.2922(2) 0.056 Uani 0.26 1 d PDU B 2 
N_26 N 0.60116(7) 0.20606(7) 0.29126(5) 0.071 Uani 1 1 d DU . . 
H0_26 H 0.6155 0.2182 0.2921 0.085 Uiso 1 1 calc R B 1 
CA_26 C 0.59701(10) 0.18210(9) 0.29175(6) 0.074 Uani 1 1 d DU B . 
HA1_26 H 0.5870 0.1737 0.3015 0.089 Uiso 1 1 calc R . . 
HA2_26 H 0.6122 0.1824 0.2930 0.089 Uiso 1 1 calc R . . 
C_26 C 0.58507(9) 0.16951(9) 0.27575(6) 0.075 Uani 1 1 d U . . 
O_26 O 0.59302(8) 0.17861(7) 0.26194(5) 0.094 Uani 1 1 d U B . 
N_27 N 0.56580(7) 0.14867(7) 0.27724(4) 0.066 Uani 1 1 d U B . 
H0_27 H 0.5608 0.1428 0.2873 0.080 Uiso 1 1 calc R . . 
CA_27 C 0.55281(10) 0.13525(9) 0.26262(6) 0.077 Uani 1 1 d U . . 
HA_27 H 0.5643 0.1359 0.2541 0.093 Uiso 1 1 calc R B . 
CB_27 C 0.53659(13) 0.10946(10) 0.26753(8) 0.097 Uani 1 1 d U B . 
HB1_27 H 0.5460 0.1029 0.2719 0.146 Uiso 1 1 calc R . . 
HB2_27 H 0.5278 0.1005 0.2576 0.146 Uiso 1 1 calc R . . 
HB3_27 H 0.5255 0.1085 0.2762 0.146 Uiso 1 1 calc R . . 
C_27 C 0.53804(11) 0.14458(9) 0.25442(6) 0.078 Uani 1 1 d U B . 
O_27 O 0.52863(12) 0.13682(11) 0.24076(6) 0.135 Uani 1 1 d U . . 
N_28 N 0.53473(7) 0.16001(6) 0.26282(4) 0.058 Uani 1 1 d U . . 
H0_28 H 0.5422 0.1656 0.2724 0.070 Uiso 1 1 calc R B . 
CA_28 C 0.51911(7) 0.16804(7) 0.25674(5) 0.056 Uani 1 1 d U B . 
HA_28 H 0.5051 0.1545 0.2514 0.067 Uiso 1 1 calc R . . 
CB_28 C 0.51062(9) 0.17711(8) 0.27148(5) 0.064 Uani 1 1 d U . . 
HB_28 H 0.5244 0.1917 0.2760 0.077 Uiso 1 1 calc R B . 
OG1_28 O 0.50181(8) 0.15976(7) 0.28441(4) 0.090 Uani 1 1 d U B . 
HG1_28 H 0.4902 0.1474 0.2808 0.135 Uiso 1 1 calc R . . 
CG2_28 C 0.49230(9) 0.18286(9) 0.26604(6) 0.070 Uani 1 1 d U B . 
HG2A_28 H 0.4869 0.1880 0.2758 0.105 Uiso 1 1 calc R . . 
HG2B_28 H 0.4790 0.1689 0.2611 0.105 Uiso 1 1 calc R . . 
HG2C_28 H 0.4990 0.1955 0.2577 0.105 Uiso 1 1 calc R . . 
C_28 C 0.53164(7) 0.18763(6) 0.24356(4) 0.051 Uani 1 1 d U . . 
O_28 O 0.55117(6) 0.20453(5) 0.24619(4) 0.075 Uani 1 1 d U B . 
N_29 N 0.51945(6) 0.18507(5) 0.22979(3) 0.048 Uani 1 1 d U B . 
H0_29 H 0.5059 0.1721 0.2284 0.057 Uiso 1 1 calc R . . 
CA_29 C 0.52788(6) 0.20324(6) 0.21668(4) 0.045 Uani 1 1 d U . . 
HA_29 H 0.5454 0.2113 0.2160 0.054 Uiso 1 1 calc R B . 
CB_29 C 0.51727(7) 0.19146(6) 0.19971(4) 0.050 Uani 1 1 d U B . 
HB1_29 H 0.4999 0.1835 0.2005 0.060 Uiso 1 1 calc R . . 
HB2_29 H 0.5223 0.2037 0.1909 0.060 Uiso 1 1 calc R . . 
CG_29 C 0.52444(8) 0.17357(7) 0.19439(5) 0.058 Uani 1 1 d U . . 
HG1_29 H 0.5418 0.1814 0.1940 0.069 Uiso 1 1 calc R B . 
HG2_29 H 0.5188 0.1609 0.2029 0.069 Uiso 1 1 calc R . . 
CD_29 C 0.51457(10) 0.16286(8) 0.17740(5) 0.066 Uani 1 1 d U B . 
HD1_29 H 0.5205 0.1754 0.1687 0.080 Uiso 1 1 calc R . . 
HD2_29 H 0.4972 0.1552 0.1777 0.080 Uiso 1 1 calc R . . 
CE_29 C 0.52166(11) 0.14475(9) 0.17288(6) 0.078 Uani 1 1 d U . . 
HE1_29 H 0.5389 0.1520 0.1738 0.094 Uiso 1 1 calc R B . 
HE2_29 H 0.5143 0.1315 0.1809 0.094 Uiso 1 1 calc R . . 
NZ_29 N 0.51423(10) 0.13575(8) 0.15539(5) 0.089 Uani 1 1 d U B . 
HZ1_29 H 0.5193 0.1255 0.1528 0.133 Uiso 1 1 calc R . . 
HZ2_29 H 0.5206 0.1480 0.1480 0.133 Uiso 1 1 calc R . . 
HZ3_29 H 0.4983 0.1282 0.1547 0.133 Uiso 1 1 calc R . . 
C_29 C 0.52030(6) 0.22119(6) 0.22071(4) 0.041 Uani 1 1 d U B . 
O_29 O 0.50141(4) 0.21505(4) 0.22776(3) 0.048 Uani 1 1 d U . . 
N_30 N 0.53467(5) 0.24320(5) 0.21550(3) 0.041 Uani 1 1 d U . . 
H0_30 H 0.5477 0.2468 0.2101 0.049 Uiso 1 1 calc R B . 
CA_30 C 0.52842(6) 0.26101(6) 0.21890(4) 0.040 Uani 1 1 d U B . 
HA1_30 H 0.5325 0.2663 0.2307 0.048 Uiso 1 1 calc R . . 
HA2_30 H 0.5112 0.2541 0.2176 0.048 Uiso 1 1 calc R . . 
C_30 C 0.54092(5) 0.28199(5) 0.20726(3) 0.034 Uani 1 1 d U . . 
O_30 O 0.55648(4) 0.28455(4) 0.19758(2) 0.037 Uani 1 1 d U B . 
N_31 N 0.53398(4) 0.29802(4) 0.20908(3) 0.036 Uani 1 1 d U B . 
H0_31 H 0.5206 0.2942 0.2141 0.043 Uiso 1 1 calc R . . 
CA_31 C 0.54902(5) 0.32180(5) 0.20269(3) 0.032 Uani 1 1 d U . . 
HA_31 H 0.5653 0.3242 0.2019 0.039 Uiso 1 1 calc R B . 
CB_31 C 0.54234(6) 0.32626(6) 0.18500(3) 0.036 Uani 1 1 d U B . 
HB1_31 H 0.5548 0.3420 0.1813 0.044 Uiso 1 1 calc R . . 
HB2_31 H 0.5426 0.3146 0.1772 0.044 Uiso 1 1 calc R . . 
CG_31 C 0.51890(6) 0.32521(6) 0.18293(3) 0.038 Uani 1 1 d U . . 
CD1_31 C 0.51607(6) 0.34414(6) 0.18769(4) 0.042 Uani 1 1 d U B . 
HD1_31 H 0.5287 0.3574 0.1930 0.050 Uiso 1 1 calc R . . 
CD2_31 C 0.50010(6) 0.30612(6) 0.17541(4) 0.045 Uani 1 1 d U B . 
HD2_31 H 0.5016 0.2930 0.1721 0.054 Uiso 1 1 calc R . . 
CE1_31 C 0.49529(7) 0.34395(7) 0.18488(4) 0.048 Uani 1 1 d U . . 
HE1_31 H 0.4938 0.3570 0.1882 0.058 Uiso 1 1 calc R B . 
CE2_31 C 0.47889(7) 0.30580(7) 0.17257(4) 0.052 Uani 1 1 d U . . 
HE2_31 H 0.4661 0.2925 0.1674 0.062 Uiso 1 1 calc R B . 
CZ_31 C 0.47645(7) 0.32477(7) 0.17721(4) 0.050 Uani 1 1 d U B . 
HZ_31 H 0.4622 0.3247 0.1752 0.061 Uiso 1 1 calc R . . 
C_31 C 0.54988(5) 0.33930(5) 0.21556(3) 0.032 Uani 1 1 d U B . 
O_31 O 0.53267(4) 0.33496(4) 0.22441(2) 0.041 Uani 1 1 d U . . 
N_32 N 0.57017(4) 0.35961(4) 0.21660(3) 0.033 Uani 1 1 d U . . 
H0_32 H 0.5825 0.3612 0.2111 0.040 Uiso 1 1 calc R B . 
CA_32 C 0.57219(5) 0.37907(5) 0.22663(3) 0.036 Uani 1 1 d U B . 
HA_32 H 0.5609 0.3722 0.2362 0.043 Uiso 1 1 calc R . . 
CB_32 C 0.59693(6) 0.39449(6) 0.23420(4) 0.040 Uani 1 1 d U . . 
HB_32 H 0.5968 0.4076 0.2405 0.048 Uiso 1 1 calc R B . 
CG1_32 C 0.60212(7) 0.38032(7) 0.24687(4) 0.050 Uani 1 1 d U B . 
HG1A_32 H 0.5905 0.3750 0.2560 0.075 Uiso 1 1 calc R . . 
HG1B_32 H 0.6179 0.3902 0.2515 0.075 Uiso 1 1 calc R . . 
HG1C_32 H 0.6013 0.3666 0.2413 0.075 Uiso 1 1 calc R . . 
CG2_32 C 0.61593(6) 0.40549(7) 0.22102(4) 0.047 Uani 1 1 d U B . 
HG2A_32 H 0.6119 0.4142 0.2130 0.070 Uiso 1 1 calc R . . 
HG2B_32 H 0.6173 0.3931 0.2151 0.070 Uiso 1 1 calc R . . 
HG2C_32 H 0.6309 0.4162 0.2264 0.070 Uiso 1 1 calc R . . 
C_32 C 0.56482(5) 0.39384(5) 0.21618(3) 0.033 Uani 1 1 d U . . 
O_32 O 0.56715(4) 0.39525(4) 0.20066(2) 0.038 Uani 1 1 d U B . 
N_33 N 0.55626(5) 0.40509(5) 0.22498(3) 0.037 Uani 1 1 d U B . 
H0_33 H 0.5557 0.4037 0.2360 0.044 Uiso 1 1 calc R . . 
CA_33 C 0.54771(6) 0.41945(5) 0.21734(3) 0.036 Uani 1 1 d U . . 
HA_33 H 0.5589 0.4293 0.2083 0.044 Uiso 1 1 calc R B . 
CB_33 C 0.52350(6) 0.40322(6) 0.20932(4) 0.039 Uani 1 1 d DU B . 
HB_33 H 0.5249 0.3914 0.2022 0.047 Uiso 1 1 calc R . . 
OG1_33 O 0.51650(4) 0.41630(4) 0.19855(3) 0.043 Uani 1 1 d DU . . 
HG1_33 H 0.5218(7) 0.4174(8) 0.1888(3) 0.064 Uiso 1 1 d D . . 
CG2_33 C 0.50432(6) 0.38994(7) 0.22205(4) 0.048 Uani 1 1 d U . . 
HG2A_33 H 0.4905 0.3774 0.2164 0.072 Uiso 1 1 calc R B . 
HG2B_33 H 0.5002 0.4007 0.2275 0.072 Uiso 1 1 calc R . . 
HG2C_33 H 0.5099 0.3830 0.2305 0.072 Uiso 1 1 calc R . . 
C_33 C 0.54767(5) 0.43578(5) 0.23121(3) 0.036 Uani 1 1 d U B . 
O_33 O 0.55687(4) 0.43721(4) 0.24497(2) 0.042 Uani 1 1 d U . . 
N_34 N 0.53764(5) 0.44874(5) 0.22718(3) 0.040 Uani 1 1 d U . . 
H0_34 H 0.5318 0.4476 0.2170 0.048 Uiso 1 1 calc R B . 
CA_34 C 0.53647(6) 0.46459(6) 0.23952(4) 0.043 Uani 1 1 d U B . 
HA_34 H 0.5510 0.4716 0.2466 0.052 Uiso 1 1 calc R . . 
CB_34 C 0.53481(8) 0.48442(7) 0.23063(5) 0.056 Uani 1 1 d U . . 
HB1_34 H 0.5485 0.4930 0.2232 0.084 Uiso 1 1 calc R B . 
HB2_34 H 0.5345 0.4952 0.2390 0.084 Uiso 1 1 calc R . . 
HB3_34 H 0.5204 0.4777 0.2239 0.084 Uiso 1 1 calc R . . 
C_34 C 0.51493(6) 0.45094(6) 0.25084(4) 0.041 Uani 1 1 d U . . 
O_34 O 0.49583(5) 0.43512(5) 0.24554(3) 0.057 Uani 1 1 d U B . 
N_35 N 0.51811(5) 0.45809(5) 0.26691(3) 0.044 Uani 1 1 d U B . 
H0_35 H 0.5321 0.4693 0.2702 0.053 Uiso 1 1 calc R . . 
CA_35 C 0.49893(7) 0.44769(7) 0.27902(4) 0.050 Uani 1 1 d U . . 
HA1_35 H 0.5052 0.4542 0.2903 0.060 Uiso 1 1 calc R B . 
HA2_35 H 0.4929 0.4305 0.2795 0.060 Uiso 1 1 calc R . . 
C_35 C 0.47855(6) 0.45172(7) 0.27528(4) 0.047 Uani 1 1 d U B . 
O_35 O 0.45844(5) 0.43636(5) 0.27906(3) 0.060 Uani 1 1 d U . . 
N_36 N 0.48335(5) 0.47185(5) 0.26782(3) 0.045 Uani 1 1 d U . . 
H0_36 H 0.4978 0.4821 0.2648 0.053 Uiso 1 1 calc R B . 
CA_36 C 0.46428(6) 0.47641(7) 0.26475(4) 0.049 Uani 1 1 d U B . 
HA_36 H 0.4547 0.4721 0.2753 0.058 Uiso 1 1 calc R . . 
CB_36 C 0.47293(7) 0.50229(7) 0.26142(4) 0.051 Uani 1 1 d U . . 
HB1_36 H 0.4596 0.5051 0.2630 0.061 Uiso 1 1 calc R B . 
HB2_36 H 0.4850 0.5117 0.2700 0.061 Uiso 1 1 calc R . . 
CG_36 C 0.48324(6) 0.51104(7) 0.24434(4) 0.048 Uani 1 1 d U B . 
CD2_36 C 0.47194(7) 0.51045(8) 0.22989(5) 0.056 Uani 1 1 d U . . 
HD2_36 H 0.4544(9) 0.5022(8) 0.2278(5) 0.067 Uiso 1 1 d . . . 
ND1_36 N 0.50692(6) 0.52328(6) 0.24066(4) 0.052 Uani 1 1 d U . . 
HD1_36 H 0.5183(8) 0.5267(8) 0.2479(5) 0.062 Uiso 1 1 d . . . 
CE1_36 C 0.50948(8) 0.52922(7) 0.22456(5) 0.057 Uani 1 1 d U B . 
HE1_36 H 0.5232(9) 0.5358(8) 0.2199(6) 0.068 Uiso 1 1 d . . . 
NE2_36 N 0.48866(6) 0.52178(6) 0.21765(4) 0.059 Uani 1 1 d U B . 
HE2_36 H 0.4895(8) 0.5267(9) 0.2061(6) 0.071 Uiso 1 1 d . . . 
C_36 C 0.44809(7) 0.46067(7) 0.25072(5) 0.053 Uani 1 1 d U . . 
O_36 O 0.42924(5) 0.46010(6) 0.24807(4) 0.073 Uani 1 1 d U B . 
N_37 N 0.45489(5) 0.44806(5) 0.24171(3) 0.050 Uani 1 1 d DU B . 
H0_37 H 0.4685 0.4490 0.2439 0.060 Uiso 1 1 calc R C 1 
C_37 C 0.41869(6) 0.41020(7) 0.23457(5) 0.055 Uani 1 1 d DU . . 
O_37 O 0.40210(5) 0.39945(6) 0.22473(3) 0.067 Uani 1 1 d DU B . 
CA_37 C 0.44004(12) 0.43279(12) 0.22827(8) 0.055 Uani 0.75 1 d PDU B 1 
HA_37 H 0.4342 0.4417 0.2215 0.066 Uiso 0.75 1 calc PR B 1 
CA_37 C 0.4408(3) 0.4321(3) 0.2285(2) 0.048 Uani 0.19 1 d PDU B 2 
HA1_37 H 0.4360 0.4407 0.2206 0.058 Uiso 0.19 1 calc PR B 2 
CA_37 C 0.4402(7) 0.4325(6) 0.2283(2) 0.054 Uani 0.06 1 d PDU B 3 
HA1_37 H 0.4347 0.4414 0.2212 0.065 Uiso 0.06 1 calc PR B 3 
CB_37 C 0.45456(14) 0.42610(18) 0.21654(11) 0.061 Uani 0.75 1 d PDU B 1 
HB1_37 H 0.4438 0.4134 0.2088 0.073 Uiso 0.75 1 calc PR B 1 
HB2_37 H 0.4629 0.4200 0.2234 0.073 Uiso 0.75 1 calc PR B 1 
CB_37 C 0.4564(5) 0.4247(4) 0.2186(3) 0.053 Uani 0.19 1 d PDU B 2 
HB3_37 H 0.4470 0.4142 0.2093 0.063 Uiso 0.19 1 calc PR B 2 
HB4_37 H 0.4608 0.4155 0.2262 0.063 Uiso 0.19 1 calc PR B 2 
CB_37 C 0.4552(13) 0.4259(18) 0.2172(14) 0.065 Uani 0.06 1 d PDU B 3 
HB3_37 H 0.4460 0.4133 0.2090 0.077 Uiso 0.06 1 calc PR B 3 
HB4_37 H 0.4664 0.4228 0.2235 0.077 Uiso 0.06 1 calc PR B 3 
SG_37 S 0.47565(3) 0.45075(3) 0.204320(19) 0.069 Uani 0.75 1 d PDU B 1 
SG1_37 S 0.48314(11) 0.44898(10) 0.20985(7) 0.065 Uani 0.19 1 d PDU B 2 
SG1_37 S 0.4703(6) 0.4605(7) 0.2071(5) 0.114 Uani 0.06 1 d PU B 3 
N_38 N 0.41847(6) 0.40244(6) 0.25005(4) 0.059 Uani 1 1 d DU B . 
H0_38 H 0.4305 0.4105 0.2568 0.071 Uiso 1 1 calc R D 1 
CA_38 C 0.3984(2) 0.3806(2) 0.25577(11) 0.069 Uani 0.70 1 d PDU B 1 
HA1_38 H 0.3977 0.3674 0.2493 0.083 Uiso 0.70 1 calc PR B 1 
HA2_38 H 0.3838 0.3811 0.2534 0.083 Uiso 0.70 1 calc PR B 1 
CA_38 C 0.3988(5) 0.3801(4) 0.2553(3) 0.067 Uani 0.30 1 d PDU B 2 
HA3_38 H 0.4020 0.3673 0.2523 0.080 Uiso 0.30 1 calc PR B 2 
HA4_38 H 0.3844 0.3773 0.2492 0.080 Uiso 0.30 1 calc PR B 2 
C_38 C 0.39945(11) 0.37639(12) 0.27417(8) 0.064 Uani 0.70 1 d PDU B 1 
C_38 C 0.3948(3) 0.3797(3) 0.27397(19) 0.082 Uani 0.30 1 d PDU B 2 
O_38 O 0.41786(7) 0.38518(8) 0.28216(5) 0.068 Uani 0.70 1 d PDU B 1 
O_38 O 0.4052(3) 0.3976(2) 0.28261(15) 0.112 Uani 0.30 1 d PDU B 2 
N_39 N 0.37850(14) 0.36225(13) 0.28109(10) 0.072 Uani 0.70 1 d PDU B 1 
H0_39 H 0.3660 0.3577 0.2747 0.086 Uiso 0.70 1 calc PR B 1 
N_39 N 0.3794(4) 0.3585(3) 0.2796(3) 0.089 Uani 0.30 1 d PDU B 2 
H0A_39 H 0.3717 0.3470 0.2724 0.106 Uiso 0.30 1 calc PR B 2 
CA_39 C 0.37491(10) 0.35399(11) 0.29806(7) 0.085 Uani 1 1 d DU . . 
HA_39 H 0.3881 0.3660 0.3051 0.102 Uiso 1 1 calc R B 1 
CB_39 C 0.35134(13) 0.35164(12) 0.30450(9) 0.106 Uani 1 1 d U B . 
HB_39 H 0.3479 0.3445 0.3160 0.127 Uiso 1 1 calc R . . 
OG1_39 O 0.33315(8) 0.33647(10) 0.29343(8) 0.124 Uani 1 1 d U . . 
HG1_39 H 0.3390 0.3355 0.2843 0.186 Uiso 1 1 calc R B . 
CG2_39 C 0.3539(2) 0.37592(19) 0.30553(13) 0.160 Uani 1 1 d U . . 
HG2A_39 H 0.3406 0.3750 0.3118 0.240 Uiso 1 1 calc R B . 
HG2B_39 H 0.3542 0.3818 0.2941 0.240 Uiso 1 1 calc R . . 
HG2C_39 H 0.3686 0.3866 0.3114 0.240 Uiso 1 1 calc R . . 
C_39 C 0.37465(8) 0.33099(10) 0.29955(6) 0.073 Uani 1 1 d U B . 
O_39 O 0.37059(6) 0.31775(7) 0.28740(4) 0.077 Uani 1 1 d U . . 
N_40 N 0.37889(7) 0.32511(9) 0.31492(5) 0.084 Uani 1 1 d U . . 
H0_40 H 0.3818 0.3348 0.3234 0.101 Uiso 1 1 calc R B . 
CA_40 C 0.37871(9) 0.30326(12) 0.31762(6) 0.086 Uani 1 1 d U B . 
HA_40 H 0.3915 0.3036 0.3106 0.103 Uiso 1 1 calc R . . 
CB_40 C 0.38410(12) 0.30064(15) 0.33621(7) 0.107 Uani 1 1 d U . . 
HB_40 H 0.3723 0.3019 0.3435 0.128 Uiso 1 1 calc R B . 
CG1_40 C 0.38181(17) 0.27665(18) 0.33909(9) 0.132 Uani 1 1 d U B . 
HG1A_40 H 0.3658 0.2643 0.3363 0.197 Uiso 1 1 calc R . . 
HG1B_40 H 0.3851 0.2752 0.3509 0.197 Uiso 1 1 calc R . . 
HG1C_40 H 0.3930 0.2750 0.3319 0.197 Uiso 1 1 calc R . . 
CG2_40 C 0.40847(14) 0.3208(2) 0.34061(10) 0.152 Uani 1 1 d U B . 
HG2A_40 H 0.4095 0.3358 0.3376 0.228 Uiso 1 1 calc R . . 
HG2B_40 H 0.4204 0.3191 0.3344 0.228 Uiso 1 1 calc R . . 
HG2C_40 H 0.4112 0.3206 0.3527 0.228 Uiso 1 1 calc R . . 
C_40 C 0.35574(9) 0.28289(11) 0.31170(6) 0.078 Uani 1 1 d U . . 
O_40 O 0.33676(6) 0.28177(8) 0.31583(5) 0.089 Uani 1 1 d U B . 
N_41 N 0.35691(8) 0.26700(9) 0.30239(5) 0.080 Uani 1 1 d U B . 
H0_41 H 0.3711 0.2695 0.3002 0.096 Uiso 1 1 calc R . . 
CA_41 C 0.33780(11) 0.24594(11) 0.29523(7) 0.088 Uani 1 1 d U . . 
HA_41 H 0.3445 0.2357 0.2922 0.105 Uiso 1 1 calc R B . 
CB_41 C 0.31775(15) 0.23156(14) 0.30762(9) 0.120 Uani 1 1 d U B . 
HB1_41 H 0.3108 0.2412 0.3114 0.144 Uiso 1 1 calc R . . 
HB2_41 H 0.3053 0.2175 0.3018 0.144 Uiso 1 1 calc R . . 
CG_41 C 0.3261(2) 0.22384(19) 0.32284(11) 0.166 Uani 1 1 d U . . 
OD1_41 O 0.3162(3) 0.2242(3) 0.33656(12) 0.291 Uani 1 1 d U B . 
ND2_41 N 0.3401(2) 0.2169(2) 0.32061(11) 0.212 Uani 1 1 d U B . 
HD2A_41 H 0.3444 0.2114 0.3291 0.254 Uiso 1 1 calc R . . 
HD2B_41 H 0.3458 0.2175 0.3105 0.254 Uiso 1 1 calc R . . 
C_41 C 0.32812(9) 0.24997(10) 0.27904(6) 0.078 Uani 1 1 d U B . 
O_41 O 0.31261(8) 0.23288(8) 0.27102(6) 0.102 Uani 1 1 d U . . 
N_42 N 0.33701(7) 0.27182(8) 0.27303(5) 0.071 Uani 1 1 d U . . 
H0_42 H 0.3479 0.2838 0.2787 0.085 Uiso 1 1 calc R B . 
CA_42 C 0.32865(8) 0.27569(9) 0.25712(6) 0.070 Uani 1 1 d U B . 
HA_42 H 0.3112 0.2683 0.2576 0.083 Uiso 1 1 calc R . . 
CB_42 C 0.33948(9) 0.30207(10) 0.25386(6) 0.074 Uani 1 1 d U . . 
HB1_42 H 0.3360 0.3094 0.2634 0.112 Uiso 1 1 calc R B . 
HB2_42 H 0.3328 0.3045 0.2435 0.112 Uiso 1 1 calc R . . 
HB3_42 H 0.3566 0.3092 0.2526 0.112 Uiso 1 1 calc R . . 
C_42 C 0.33503(7) 0.26439(8) 0.24295(6) 0.063 Uani 1 1 d U . . 
O_42 O 0.35308(5) 0.26321(6) 0.24310(4) 0.070 Uani 1 1 d U B . 
N_43 N 0.31979(6) 0.25623(8) 0.23010(5) 0.070 Uani 1 1 d U B . 
H0_43 H 0.3081 0.2592 0.2300 0.084 Uiso 1 1 calc R . . 
CA_43 C 0.32166(8) 0.24282(8) 0.21644(6) 0.066 Uani 1 1 d U . . 
HA_43 H 0.3296 0.2342 0.2207 0.079 Uiso 1 1 calc R B . 
CB_43 C 0.29715(9) 0.22495(10) 0.21016(7) 0.083 Uani 1 1 d U B . 
HB_43 H 0.2891 0.2336 0.2062 0.100 Uiso 1 1 calc R . . 
OG1_43 O 0.28431(10) 0.21033(12) 0.22381(7) 0.152 Uani 1 1 d U . . 
HG1_43 H 0.2861 0.2186 0.2323 0.229 Uiso 1 1 calc R B . 
CG2_43 C 0.29788(11) 0.21007(11) 0.19588(9) 0.100 Uani 1 1 d U . . 
HG2A_43 H 0.2820 0.1969 0.1938 0.150 Uiso 1 1 calc R B . 
HG2B_43 H 0.3083 0.2040 0.1989 0.150 Uiso 1 1 calc R . . 
HG2C_43 H 0.3038 0.2197 0.1857 0.150 Uiso 1 1 calc R . . 
C_43 C 0.33607(7) 0.25865(8) 0.20162(5) 0.058 Uani 1 1 d U B . 
O_43 O 0.33037(5) 0.27202(6) 0.19506(4) 0.065 Uani 1 1 d U . . 
N_44 N 0.35376(6) 0.25604(6) 0.19641(4) 0.056 Uani 1 1 d U . . 
H0_44 H 0.3567 0.2461 0.2018 0.068 Uiso 1 1 calc R B . 
CA_44 C 0.36847(6) 0.26900(7) 0.18218(5) 0.053 Uani 1 1 d U B . 
HA_44 H 0.3673 0.2834 0.1802 0.063 Uiso 1 1 calc R . . 
CB_44 C 0.39429(7) 0.27628(8) 0.18561(5) 0.059 Uani 1 1 d U . . 
HB1_44 H 0.3999 0.2865 0.1956 0.089 Uiso 1 1 calc R B . 
HB2_44 H 0.4039 0.2848 0.1759 0.089 Uiso 1 1 calc R . . 
HB3_44 H 0.3955 0.2622 0.1876 0.089 Uiso 1 1 calc R . . 
C_44 C 0.36015(6) 0.25354(7) 0.16643(5) 0.054 Uani 1 1 d U . . 
O_44 O 0.35571(5) 0.23293(5) 0.16702(4) 0.061 Uani 1 1 d U B . 
N_45 N 0.35883(6) 0.26408(6) 0.15235(4) 0.056 Uani 1 1 d U B . 
H0_45 H 0.3615 0.2786 0.1530 0.067 Uiso 1 1 calc R . . 
CA_45 C 0.35322(7) 0.25252(7) 0.13601(5) 0.059 Uani 1 1 d U . . 
HA_45 H 0.3528 0.2371 0.1371 0.071 Uiso 1 1 calc R B . 
CB_45 C 0.32926(8) 0.24793(9) 0.12932(6) 0.070 Uani 1 1 d U B . 
HB1_45 H 0.3290 0.2629 0.1295 0.084 Uiso 1 1 calc R . . 
HB2_45 H 0.3276 0.2427 0.1175 0.084 Uiso 1 1 calc R . . 
CG_45 C 0.30860(8) 0.22975(9) 0.13919(7) 0.075 Uani 1 1 d U . . 
HG1_45 H 0.3112 0.2338 0.1513 0.090 Uiso 1 1 calc R B . 
HG2_45 H 0.3075 0.2143 0.1377 0.090 Uiso 1 1 calc R . . 
CD_45 C 0.28545(9) 0.22792(11) 0.13366(9) 0.093 Uani 1 1 d U B . 
HD1_45 H 0.2860 0.2430 0.1362 0.111 Uiso 1 1 calc R . . 
HD2_45 H 0.2838 0.2255 0.1213 0.111 Uiso 1 1 calc R . . 
NE_45 N 0.26502(8) 0.20901(9) 0.14178(9) 0.109 Uani 1 1 d U . . 
HE_45 H 0.2571 0.1958 0.1361 0.131 Uiso 1 1 calc R B . 
CZ_45 C 0.25719(9) 0.20970(12) 0.15675(11) 0.109 Uani 1 1 d U B . 
NH1_45 N 0.26771(8) 0.22885(10) 0.16550(7) 0.098 Uani 1 1 d U . . 
HH1A_45 H 0.2624 0.2294 0.1755 0.117 Uiso 1 1 calc R B . 
HH1B_45 H 0.2802 0.2413 0.1614 0.117 Uiso 1 1 calc R . . 
NH2_45 N 0.23864(10) 0.19109(11) 0.16260(12) 0.146 Uani 1 1 d U . . 
HH2A_45 H 0.2331 0.1915 0.1726 0.175 Uiso 1 1 calc R B . 
HH2B_45 H 0.2316 0.1782 0.1565 0.175 Uiso 1 1 calc R . . 
C_45 C 0.37181(8) 0.26754(7) 0.12315(5) 0.061 Uani 1 1 d U B . 
O_45 O 0.38117(5) 0.28907(5) 0.12313(4) 0.065 Uani 1 1 d U . . 
N_46 N 0.37670(7) 0.25543(6) 0.11189(4) 0.064 Uani 1 1 d DU . . 
H0_46 H 0.3706 0.2402 0.1134 0.077 Uiso 1 1 calc R B 1 
CA_46 C 0.39155(12) 0.26627(11) 0.09731(6) 0.073 Uani 0.84 1 d PDU B 1 
HA_46 H 0.3940 0.2825 0.0958 0.087 Uiso 0.84 1 calc PR B 1 
CA_46 C 0.3912(3) 0.2647(3) 0.0969(2) 0.081 Uani 0.16 1 d PDU B 2 
HA1_46 H 0.3926 0.2801 0.0938 0.097 Uiso 0.16 1 calc PR B 2 
CB_46 C 0.41596(9) 0.26787(8) 0.09934(5) 0.074 Uani 1 1 d DU . . 
HB_46 H 0.4131 0.2518 0.1019 0.089 Uiso 1 1 calc R B 1 
CG2_46 C 0.42969(14) 0.27593(11) 0.08274(7) 0.101 Uani 1 1 d DU B . 
HG2A_46 H 0.4205 0.2650 0.0737 0.152 Uiso 1 1 calc R . . 
HG2B_46 H 0.4447 0.2762 0.0839 0.152 Uiso 1 1 calc R . . 
HG2C_46 H 0.4327 0.2917 0.0799 0.152 Uiso 1 1 calc R . . 
CG1_46 C 0.42955(9) 0.28393(8) 0.11393(6) 0.069 Uani 1 1 d DU B . 
HG1A_46 H 0.4334 0.3001 0.1111 0.083 Uiso 1 1 calc R . . 
HG1B_46 H 0.4193 0.2790 0.1240 0.083 Uiso 1 1 calc R . . 
CD1_46 C 0.45212(10) 0.28428(11) 0.11840(8) 0.091 Uani 1 1 d DU . . 
HD1A_46 H 0.4578 0.2920 0.1293 0.137 Uiso 1 1 calc R B . 
HD1B_46 H 0.4640 0.2930 0.1098 0.137 Uiso 1 1 calc R . . 
HD1C_46 H 0.4492 0.2681 0.1190 0.137 Uiso 1 1 calc R . . 
C_46 C 0.37753(14) 0.25117(13) 0.08265(7) 0.091 Uani 0.84 1 d PDU B 1 
C_46 C 0.3862(4) 0.2497(4) 0.0812(2) 0.092 Uani 0.16 1 d PDU B 2 
O_46 O 0.36757(10) 0.22891(8) 0.08356(6) 0.092 Uani 0.84 1 d PDU B 1 
O_46 O 0.3795(4) 0.2288(3) 0.0824(2) 0.071 Uani 0.16 1 d PDU B 2 
N_47 N 0.37646(15) 0.26118(13) 0.06870(6) 0.114 Uani 0.84 1 d PDU B 1 
H0_47 H 0.3828 0.2766 0.0684 0.136 Uiso 0.84 1 calc PR B 1 
N_47 N 0.3906(5) 0.2608(4) 0.0667(2) 0.093 Uani 0.16 1 d PDU B 2 
H0A_47 H 0.3981 0.2762 0.0666 0.111 Uiso 0.16 1 calc PR B 2 
CA_47 C 0.3651(2) 0.2476(2) 0.05353(10) 0.179 Uani 0.84 1 d PDU B 1 
HA1_47 H 0.3732 0.2391 0.0499 0.214 Uiso 0.84 1 calc PR B 1 
HA2_47 H 0.3666 0.2585 0.0444 0.214 Uiso 0.84 1 calc PR B 1 
CA_47 C 0.3836(5) 0.2483(6) 0.0507(3) 0.118 Uani 0.16 1 d PDU B 2 
HA3_47 H 0.3943 0.2423 0.0482 0.142 Uiso 0.16 1 calc PR B 2 
HA4_47 H 0.3857 0.2598 0.0418 0.142 Uiso 0.16 1 calc PR B 2 
C_47 C 0.3392(2) 0.2300(2) 0.05645(14) 0.202 Uani 0.84 1 d PDU B 1 
C_47 C 0.3586(4) 0.2281(5) 0.0497(3) 0.114 Uani 0.16 1 d PDU B 2 
O_47 O 0.3295(3) 0.2119(2) 0.04798(12) 0.294 Uani 0.84 1 d PDU B 1 
O_47 O 0.3526(5) 0.2109(7) 0.0402(4) 0.168 Uani 0.16 1 d PDU B 2 
N_48 N 0.32791(16) 0.2348(2) 0.06825(14) 0.198 Uani 0.84 1 d PDU B 1 
H0_48 H 0.3357 0.2477 0.0743 0.237 Uiso 0.84 1 calc PR B 1 
N_48 N 0.3421(4) 0.2279(6) 0.0595(4) 0.116 Uani 0.16 1 d PDU B 2 
H0A_48 H 0.3467 0.2392 0.0670 0.139 Uiso 0.16 1 calc PR B 2 
CA_48 C 0.30324(19) 0.2193(3) 0.0715(2) 0.288 Uani 0.84 1 d PDU B 1 
HA1_48 H 0.2954 0.2122 0.0607 0.346 Uiso 0.84 1 calc PR B 1 
HA2_48 H 0.2965 0.2289 0.0757 0.346 Uiso 0.84 1 calc PR B 1 
CA_48 C 0.3173(5) 0.2108(7) 0.0589(4) 0.122 Uani 0.16 1 d PDU B 2 
HA3_48 H 0.3142 0.2020 0.0482 0.146 Uiso 0.16 1 calc PR B 2 
HA4_48 H 0.3086 0.2195 0.0584 0.146 Uiso 0.16 1 calc PR B 2 
C_48 C 0.29743(17) 0.1996(2) 0.08404(15) 0.183 Uani 0.84 1 d PDU B 1 
C_48 C 0.3072(4) 0.1932(4) 0.0731(3) 0.106 Uani 0.16 1 d PDU B 2 
O_48 O 0.27675(17) 0.1859(3) 0.0886(2) 0.354 Uani 0.84 1 d PDU B 1 
O_48 O 0.2879(5) 0.1750(5) 0.0709(3) 0.125 Uani 0.16 1 d PDU B 2 
N_49 N 0.31509(16) 0.19727(14) 0.08970(10) 0.127 Uani 0.84 1 d PDU B 1 
H0_49 H 0.3295 0.2081 0.0871 0.153 Uiso 0.84 1 calc PR B 1 
N_49 N 0.3179(6) 0.1965(4) 0.0878(3) 0.156 Uani 0.16 1 d PDU B 2 
H0A_49 H 0.3292 0.2107 0.0904 0.187 Uiso 0.16 1 calc PR B 2 
CA_49 C 0.31179(12) 0.17762(11) 0.10003(8) 0.108 Uani 1 1 d DU . . 
CB_49 C 0.32300(17) 0.16418(17) 0.09287(10) 0.140 Uani 1 1 d DU B . 
C_49 C 0.32236(9) 0.18678(9) 0.11735(7) 0.084 Uani 1 1 d DU B . 
O_49 O 0.34113(6) 0.20560(6) 0.11897(4) 0.079 Uani 1 1 d DU . . 
N_50 N 0.31045(8) 0.17331(7) 0.13028(6) 0.083 Uani 1 1 d DU . . 
H0_50 H 0.2964 0.1611 0.1285 0.099 Uiso 1 1 calc R B . 
CA_50 C 0.32011(8) 0.17834(8) 0.14743(6) 0.073 Uani 1 1 d U B . 
HA_50 H 0.3244 0.1948 0.1503 0.087 Uiso 1 1 calc R . . 
CB_50 C 0.30176(9) 0.16199(10) 0.15986(8) 0.088 Uani 1 1 d U . . 
HB_50 H 0.2962 0.1455 0.1562 0.106 Uiso 1 1 calc R B . 
CG1_50 C 0.31268(11) 0.16535(12) 0.17749(8) 0.095 Uani 1 1 d U B . 
HG1A_50 H 0.3005 0.1551 0.1855 0.142 Uiso 1 1 calc R . . 
HG1B_50 H 0.3193 0.1818 0.1810 0.142 Uiso 1 1 calc R . . 
HG1C_50 H 0.3252 0.1614 0.1772 0.142 Uiso 1 1 calc R . . 
CG2_50 C 0.28071(11) 0.16543(13) 0.16041(10) 0.106 Uani 1 1 d U B . 
HG2A_50 H 0.2733 0.1622 0.1493 0.160 Uiso 1 1 calc R . . 
HG2B_50 H 0.2858 0.1817 0.1636 0.160 Uiso 1 1 calc R . . 
HG2C_50 H 0.2694 0.1546 0.1687 0.160 Uiso 1 1 calc R . . 
C_50 C 0.34247(8) 0.17677(8) 0.14789(5) 0.064 Uani 1 1 d U . . 
O_50 O 0.34213(6) 0.15898(5) 0.14260(5) 0.076 Uani 1 1 d U B . 
N_51 N 0.36109(6) 0.19460(6) 0.15485(4) 0.056 Uani 1 1 d U B . 
H0_51 H 0.3602 0.2069 0.1583 0.067 Uiso 1 1 calc R . . 
CA_51 C 0.38303(7) 0.19451(7) 0.15703(5) 0.056 Uani 1 1 d U . . 
HA_51 H 0.3806 0.1795 0.1519 0.068 Uiso 1 1 calc R B . 
CB_51 C 0.40370(8) 0.21463(8) 0.14748(5) 0.058 Uani 1 1 d U B . 
HB_51 H 0.4178 0.2128 0.1491 0.070 Uiso 1 1 calc R . . 
CG1_51 C 0.39844(9) 0.21266(9) 0.12870(5) 0.068 Uani 1 1 d U . . 
HG1A_51 H 0.3958 0.1975 0.1245 0.102 Uiso 1 1 calc R B . 
HG1B_51 H 0.4118 0.2254 0.1227 0.102 Uiso 1 1 calc R . . 
HG1C_51 H 0.3843 0.2138 0.1267 0.102 Uiso 1 1 calc R . . 
CG2_51 C 0.40986(8) 0.23907(8) 0.15410(5) 0.063 Uani 1 1 d U . . 
HG2A_51 H 0.4133 0.2400 0.1662 0.094 Uiso 1 1 calc R B . 
HG2B_51 H 0.3965 0.2416 0.1522 0.094 Uiso 1 1 calc R . . 
HG2C_51 H 0.4237 0.2512 0.1481 0.094 Uiso 1 1 calc R . . 
C_51 C 0.38965(7) 0.19427(7) 0.17534(5) 0.055 Uani 1 1 d U B . 
O_51 O 0.40445(5) 0.18854(5) 0.17891(3) 0.057 Uani 1 1 d U . . 
N_52 N 0.37973(6) 0.20096(7) 0.18706(4) 0.060 Uani 1 1 d U . . 
H0_52 H 0.3695 0.2052 0.1840 0.072 Uiso 1 1 calc R B . 
CA_52 C 0.38550(9) 0.20144(10) 0.20481(5) 0.069 Uani 1 1 d U B . 
HA1_52 H 0.4028 0.2089 0.2062 0.083 Uiso 1 1 calc R . . 
HA2_52 H 0.3782 0.1852 0.2092 0.083 Uiso 1 1 calc R . . 
C_52 C 0.37652(7) 0.21519(7) 0.21458(5) 0.054 Uani 1 1 d U . . 
O_52 O 0.36174(5) 0.21936(5) 0.20860(3) 0.060 Uani 1 1 d U B . 
N_53 N 0.38556(6) 0.22151(6) 0.23002(4) 0.054 Uani 1 1 d U B . 
H0_53 H 0.3967 0.2186 0.2332 0.065 Uiso 1 1 calc R . . 
CA_53 C 0.37745(7) 0.23322(8) 0.24172(5) 0.057 Uani 1 1 d U . . 
HA_53 H 0.3702 0.2408 0.2350 0.068 Uiso 1 1 calc R B . 
CB_53 C 0.35891(9) 0.21589(10) 0.25428(6) 0.082 Uani 1 1 d U B . 
HB_53 H 0.3534 0.2251 0.2611 0.098 Uiso 1 1 calc R . . 
OG1_53 O 0.36979(10) 0.20795(10) 0.26534(6) 0.117 Uani 1 1 d U . . 
HG1_53 H 0.3741 0.1996 0.2601 0.175 Uiso 1 1 calc R B . 
CG2_53 C 0.33756(11) 0.19646(12) 0.24562(9) 0.109 Uani 1 1 d U . . 
HG2A_53 H 0.3248 0.1885 0.2538 0.164 Uiso 1 1 calc R B . 
HG2B_53 H 0.3415 0.1851 0.2408 0.164 Uiso 1 1 calc R . . 
HG2C_53 H 0.3325 0.2031 0.2366 0.164 Uiso 1 1 calc R . . 
C_53 C 0.39838(7) 0.25211(7) 0.25095(4) 0.054 Uani 1 1 d U B . 
O_53 O 0.41640(5) 0.25102(6) 0.25305(3) 0.065 Uani 1 1 d U . . 
N_54 N 0.39614(5) 0.26971(6) 0.25714(4) 0.053 Uani 1 1 d U . . 
H0_54 H 0.3834 0.2704 0.2548 0.064 Uiso 1 1 calc R B . 
CA_54 C 0.41432(6) 0.28767(7) 0.26759(4) 0.051 Uani 1 1 d U B . 
HA_54 H 0.4297 0.2942 0.2616 0.062 Uiso 1 1 calc R . . 
CB_54 C 0.40960(7) 0.30785(8) 0.27112(4) 0.055 Uani 1 1 d U . . 
HB1_54 H 0.3926 0.3012 0.2732 0.066 Uiso 1 1 calc R B . 
HB2_54 H 0.4181 0.3160 0.2815 0.066 Uiso 1 1 calc R . . 
CG_54 C 0.41698(6) 0.32561(7) 0.25705(4) 0.051 Uani 1 1 d U B . 
CD1_54 C 0.40513(7) 0.31999(7) 0.24164(5) 0.053 Uani 1 1 d U . . 
HD1_54 H 0.3916 0.3049 0.2401 0.064 Uiso 1 1 calc R B . 
CD2_54 C 0.43644(7) 0.34806(8) 0.25891(5) 0.057 Uani 1 1 d U . . 
HD2_54 H 0.4447 0.3523 0.2693 0.068 Uiso 1 1 calc R B . 
CE1_54 C 0.41285(7) 0.33619(8) 0.22856(5) 0.057 Uani 1 1 d U B . 
HE1_54 H 0.4047 0.3321 0.2181 0.069 Uiso 1 1 calc R . . 
CE2_54 C 0.44392(7) 0.36412(8) 0.24599(5) 0.059 Uani 1 1 d U B . 
HE2_54 H 0.4571 0.3794 0.2476 0.070 Uiso 1 1 calc R . . 
CZ_54 C 0.43244(7) 0.35830(8) 0.23064(5) 0.057 Uani 1 1 d U . . 
HZ_54 H 0.4379 0.3693 0.2216 0.068 Uiso 1 1 calc R B . 
C_54 C 0.41608(7) 0.27687(7) 0.28423(5) 0.055 Uani 1 1 d U . . 
O_54 O 0.39903(5) 0.26768(7) 0.29380(4) 0.078 Uani 1 1 d U B . 
N_55 N 0.43635(5) 0.27838(6) 0.28763(3) 0.051 Uani 1 1 d U B . 
H0_55 H 0.4480 0.2854 0.2804 0.061 Uiso 1 1 calc R . . 
CA_55 C 0.43995(7) 0.26862(7) 0.30320(5) 0.057 Uani 1 1 d U . . 
HA_55 H 0.4251 0.2538 0.3060 0.068 Uiso 1 1 calc R B . 
CB_55 C 0.45931(10) 0.26272(10) 0.30063(6) 0.078 Uani 1 1 d U B . 
HB1_55 H 0.4543 0.2502 0.2922 0.117 Uiso 1 1 calc R . . 
HB2_55 H 0.4626 0.2575 0.3113 0.117 Uiso 1 1 calc R . . 
HB3_55 H 0.4736 0.2767 0.2967 0.117 Uiso 1 1 calc R . . 
C_55 C 0.44619(7) 0.28546(7) 0.31764(4) 0.055 Uani 1 1 d U B . 
O_55 O 0.43971(6) 0.27779(6) 0.33219(3) 0.076 Uani 1 1 d U . . 
N_56 N 0.45945(6) 0.30820(6) 0.31450(4) 0.054 Uani 1 1 d U . . 
H0_56 H 0.4625 0.3128 0.3039 0.065 Uiso 1 1 calc R B . 
CA_56 C 0.46916(7) 0.32588(7) 0.32763(5) 0.056 Uani 1 1 d U B . 
HA_56 H 0.4566 0.3229 0.3360 0.067 Uiso 1 1 calc R . . 
CB_56 C 0.48945(9) 0.32549(9) 0.33666(6) 0.072 Uani 1 1 d U . . 
HB1_56 H 0.4841 0.3097 0.3412 0.107 Uiso 1 1 calc R B . 
HB2_56 H 0.4950 0.3369 0.3459 0.107 Uiso 1 1 calc R . . 
HB3_56 H 0.5023 0.3296 0.3287 0.107 Uiso 1 1 calc R . . 
C_56 C 0.47781(7) 0.34958(7) 0.31950(5) 0.055 Uani 1 1 d U . . 
O_56 O 0.48490(5) 0.35284(5) 0.30467(3) 0.060 Uani 1 1 d U B . 
N_57 N 0.47776(6) 0.36589(6) 0.32915(4) 0.058 Uani 1 1 d DU B . 
H0_57 H 0.4715 0.3622 0.3393 0.069 Uiso 1 1 calc R E 1 
C_57 C 0.49467(9) 0.40638(8) 0.33816(5) 0.071 Uani 1 1 d DU . . 
O_57 O 0.48459(8) 0.39921(6) 0.35184(4) 0.095 Uani 1 1 d DU . . 
CA_57 C 0.4879(2) 0.3898(2) 0.32318(13) 0.064 Uani 0.58 1 d PDU B 1 
HA_57 H 0.5023 0.3939 0.3165 0.077 Uiso 0.58 1 calc PR B 1 
CA_57 C 0.4865(2) 0.3899(2) 0.32330(16) 0.060 Uani 0.42 1 d PDU B 2 
HA1_57 H 0.5005 0.3942 0.3160 0.072 Uiso 0.42 1 calc PR B 2 
CB_57 C 0.4701(3) 0.3925(4) 0.31175(16) 0.081 Uani 0.58 1 d PDU B 1 
HB1_57 H 0.4784 0.4069 0.3048 0.098 Uiso 0.58 1 calc PR B 1 
HB2_57 H 0.4620 0.3788 0.3042 0.098 Uiso 0.58 1 calc PR B 1 
CB_57 C 0.4682(3) 0.3927(4) 0.31272(19) 0.077 Uani 0.42 1 d PDU B 2 
HB3_57 H 0.4752 0.4094 0.3096 0.092 Uiso 0.42 1 calc PR B 2 
HB4_57 H 0.4654 0.3836 0.3022 0.092 Uiso 0.42 1 calc PR B 2 
CG_57 C 0.4519(2) 0.3942(2) 0.32338(16) 0.111 Uani 0.58 1 d PDU B 1 
HG1_57 H 0.4376 0.3786 0.3243 0.133 Uiso 0.58 1 calc PR B 1 
HG2_57 H 0.4587 0.3992 0.3348 0.133 Uiso 0.58 1 calc PR B 1 
CG_57 C 0.4444(2) 0.3850(3) 0.32087(19) 0.092 Uani 0.42 1 d PDU B 2 
HG3_57 H 0.4318 0.3765 0.3124 0.111 Uiso 0.42 1 calc PR B 2 
HG4_57 H 0.4419 0.3739 0.3302 0.111 Uiso 0.42 1 calc PR B 2 
CD_57 C 0.4460(3) 0.4107(3) 0.31683(19) 0.168 Uani 0.58 1 d PDU B 1 
HD1_57 H 0.4414 0.4067 0.3049 0.201 Uiso 0.58 1 calc PR B 1 
HD2_57 H 0.4602 0.4265 0.3171 0.201 Uiso 0.58 1 calc PR B 1 
CD_57 C 0.4423(2) 0.4052(3) 0.32766(11) 0.093 Uani 0.42 1 d PDU B 2 
HD3_57 H 0.4301 0.3997 0.3365 0.112 Uiso 0.42 1 calc PR B 2 
HD4_57 H 0.4575 0.4172 0.3326 0.112 Uiso 0.42 1 calc PR B 2 
NE_57 N 0.42693(18) 0.4117(2) 0.32570(12) 0.151 Uani 0.58 1 d PDU B 1 
HE_57 H 0.4222 0.4048 0.3356 0.182 Uiso 0.58 1 calc PR B 1 
NE_57 N 0.43605(18) 0.4148(2) 0.31351(11) 0.091 Uani 0.42 1 d PDU B 2 
HE1_57 H 0.4401 0.4123 0.3035 0.109 Uiso 0.42 1 calc PR B 2 
CZ_57 C 0.41710(15) 0.42237(15) 0.31930(10) 0.077 Uani 0.58 1 d PDU B 1 
CZ_57 C 0.42491(18) 0.4267(2) 0.31388(15) 0.079 Uani 0.42 1 d PDU B 2 
NH1_57 N 0.4241(2) 0.4323(3) 0.30450(12) 0.135 Uani 0.58 1 d PDU B 1 
HH1A_57 H 0.4355 0.4315 0.2992 0.162 Uiso 0.58 1 calc PR B 1 
HH1B_57 H 0.4175 0.4398 0.2999 0.162 Uiso 0.58 1 calc PR B 1 
NH1_57 N 0.4209(2) 0.4338(2) 0.29933(15) 0.093 Uani 0.42 1 d PDU B 2 
HH1C_57 H 0.4256 0.4304 0.2899 0.112 Uiso 0.42 1 calc PR B 2 
HH1D_57 H 0.4135 0.4419 0.2991 0.112 Uiso 0.42 1 calc PR B 2 
NH2_57 N 0.40009(17) 0.4228(2) 0.32769(12) 0.120 Uani 0.58 1 d PDU B 1 
HH2A_57 H 0.3957 0.4158 0.3375 0.144 Uiso 0.58 1 calc PR B 1 
HH2B_57 H 0.3931 0.4301 0.3235 0.144 Uiso 0.58 1 calc PR B 1 
NH2_57 N 0.4177(3) 0.4307(3) 0.32896(16) 0.123 Uani 0.42 1 d PDU B 2 
HH2C_57 H 0.4206 0.4253 0.3383 0.147 Uiso 0.42 1 calc PR B 2 
HH2D_57 H 0.4103 0.4387 0.3294 0.147 Uiso 0.42 1 calc PR B 2 
N_58 N 0.51055(7) 0.42836(6) 0.33485(4) 0.066 Uani 1 1 d DU B . 
H0_58 H 0.5183 0.4315 0.3253 0.079 Uiso 1 1 calc R . . 
CA_58 C 0.51586(9) 0.44798(8) 0.34658(5) 0.067 Uani 1 1 d U . . 
HA_58 H 0.5029 0.4425 0.3550 0.080 Uiso 1 1 calc R B . 
CB_58 C 0.53906(10) 0.45741(9) 0.35588(5) 0.075 Uani 1 1 d U B . 
HB_58 H 0.5521 0.4657 0.3475 0.090 Uiso 1 1 calc R . . 
CG1_58 C 0.54075(11) 0.47568(11) 0.36885(6) 0.085 Uani 1 1 d U . . 
HG1A_58 H 0.5401 0.4885 0.3630 0.127 Uiso 1 1 calc R B . 
HG1B_58 H 0.5556 0.4820 0.3750 0.127 Uiso 1 1 calc R . . 
HG1C_58 H 0.5276 0.4681 0.3768 0.127 Uiso 1 1 calc R . . 
CG2_58 C 0.54200(13) 0.43840(11) 0.36400(7) 0.093 Uani 1 1 d U . . 
HG2A_58 H 0.5573 0.4454 0.3697 0.140 Uiso 1 1 calc R B . 
HG2B_58 H 0.5412 0.4274 0.3554 0.140 Uiso 1 1 calc R . . 
HG2C_58 H 0.5294 0.4300 0.3722 0.140 Uiso 1 1 calc R . . 
C_58 C 0.51578(8) 0.46713(8) 0.33578(5) 0.061 Uani 1 1 d U B . 
O_58 O 0.53019(6) 0.47663(5) 0.32435(4) 0.073 Uani 1 1 d U . . 
N_59 N 0.49990(6) 0.47337(6) 0.33996(4) 0.060 Uani 1 1 d U . . 
H0_59 H 0.4895 0.4654 0.3478 0.071 Uiso 1 1 calc R B . 
CA_59 C 0.49926(8) 0.49298(7) 0.33192(4) 0.057 Uani 1 1 d U B . 
HA_59 H 0.5154 0.5071 0.3318 0.068 Uiso 1 1 calc R . . 
CB_59 C 0.48927(8) 0.48709(8) 0.31389(5) 0.063 Uani 1 1 d U . . 
HB1_59 H 0.4998 0.4840 0.3068 0.076 Uiso 1 1 calc R B . 
HB2_59 H 0.4736 0.4727 0.3141 0.076 Uiso 1 1 calc R . . 
CG_59 C 0.48701(7) 0.50660(8) 0.30639(5) 0.058 Uani 1 1 d U B . 
CD1_59 C 0.46517(8) 0.50562(9) 0.30544(5) 0.069 Uani 1 1 d U . . 
HD1_59 H 0.4514 0.4919 0.3092 0.083 Uiso 1 1 calc R B . 
CD2_59 C 0.50673(7) 0.52695(7) 0.30058(5) 0.057 Uani 1 1 d U . . 
HD2_59 H 0.5217 0.5280 0.3010 0.068 Uiso 1 1 calc R B . 
CE1_59 C 0.46333(9) 0.52412(10) 0.29917(6) 0.076 Uani 1 1 d U B . 
HE1_59 H 0.4484 0.5231 0.2986 0.091 Uiso 1 1 calc R . . 
CE2_59 C 0.50494(8) 0.54556(8) 0.29421(5) 0.063 Uani 1 1 d U B . 
HE2_59 H 0.5185 0.5592 0.2902 0.075 Uiso 1 1 calc R . . 
CZ_59 C 0.48298(9) 0.54412(9) 0.29370(5) 0.070 Uani 1 1 d U . . 
HZ_59 H 0.4817 0.5570 0.2896 0.084 Uiso 1 1 calc R B . 
C_59 C 0.48270(7) 0.49807(8) 0.34253(5) 0.060 Uani 1 1 d U . . 
O_59 O 0.46342(6) 0.48127(6) 0.34629(4) 0.073 Uani 1 1 d U B . 
N_60 N 0.48911(6) 0.51999(6) 0.34660(4) 0.057 Uani 1 1 d U B . 
CD_60 C 0.47197(8) 0.52510(9) 0.35476(6) 0.073 Uani 1 1 d U . . 
HD1_60 H 0.4661 0.5162 0.3654 0.088 Uiso 1 1 calc R B . 
HD2_60 H 0.4585 0.5211 0.3472 0.088 Uiso 1 1 calc R . . 
CA_60 C 0.51171(7) 0.54146(7) 0.34393(5) 0.055 Uani 1 1 d U . . 
HA_60 H 0.5175 0.5411 0.3324 0.066 Uiso 1 1 calc R B . 
CB_60 C 0.50477(8) 0.56061(8) 0.34468(5) 0.062 Uani 1 1 d U B . 
HB1_60 H 0.5183 0.5760 0.3480 0.074 Uiso 1 1 calc R . . 
HB2_60 H 0.4986 0.5623 0.3337 0.074 Uiso 1 1 calc R . . 
CG_60 C 0.48575(8) 0.55127(9) 0.35809(6) 0.074 Uani 1 1 d U B . 
HG1_60 H 0.4927 0.5546 0.3695 0.089 Uiso 1 1 calc R . . 
HG2_60 H 0.4756 0.5584 0.3570 0.089 Uiso 1 1 calc R . . 
C_60 C 0.52986(7) 0.54320(7) 0.35681(4) 0.056 Uani 1 1 d U B . 
O_60 O 0.52851(5) 0.52503(5) 0.36274(3) 0.062 Uani 1 1 d U . . 
N_61 N 0.54775(6) 0.56434(6) 0.36033(4) 0.057 Uani 1 1 d U . . 
H0_61 H 0.5476 0.5767 0.3563 0.068 Uiso 1 1 calc R B . 
CA_61 C 0.56743(8) 0.56789(9) 0.37058(5) 0.063 Uani 1 1 d U B . 
HA1_61 H 0.5619 0.5558 0.3796 0.076 Uiso 1 1 calc R . . 
HA2_61 H 0.5746 0.5836 0.3760 0.076 Uiso 1 1 calc R . . 
C_61 C 0.58580(8) 0.56620(8) 0.35972(4) 0.056 Uani 1 1 d U . . 
O_61 O 0.60517(5) 0.58322(6) 0.35660(3) 0.064 Uani 1 1 d U B . 
N_62 N 0.57835(6) 0.54467(6) 0.35352(3) 0.055 Uani 1 1 d U B . 
H0_62 H 0.5660 0.5328 0.3582 0.066 Uiso 1 1 calc R . . 
CA_62 C 0.58948(7) 0.53973(7) 0.33955(4) 0.050 Uani 1 1 d U . . 
HA_62 H 0.6047 0.5542 0.3369 0.060 Uiso 1 1 calc R B . 
CB_62 C 0.59439(8) 0.51987(8) 0.34420(5) 0.060 Uani 1 1 d U B . 
HB1_62 H 0.5792 0.5051 0.3455 0.072 Uiso 1 1 calc R . . 
HB2_62 H 0.6029 0.5176 0.3348 0.072 Uiso 1 1 calc R . . 
CG_62 C 0.60863(9) 0.52425(10) 0.36027(5) 0.068 Uani 1 1 d U . . 
OD1_62 O 0.60149(8) 0.50879(9) 0.37108(5) 0.105 Uani 1 1 d U B . 
ND2_62 N 0.62774(8) 0.54447(9) 0.36168(4) 0.078 Uani 1 1 d U B . 
HD2A_62 H 0.6364 0.5478 0.3708 0.093 Uiso 1 1 calc R . . 
HD2B_62 H 0.6320 0.5549 0.3535 0.093 Uiso 1 1 calc R . . 
C_62 C 0.57327(6) 0.53325(6) 0.32429(4) 0.045 Uani 1 1 d U B . 
O_62 O 0.55504(4) 0.53422(5) 0.32484(3) 0.051 Uani 1 1 d U . . 
N_63 N 0.58011(5) 0.52640(5) 0.31045(3) 0.046 Uani 1 1 d U . . 
H0_63 H 0.5941 0.5276 0.3100 0.055 Uiso 1 1 calc R B . 
CA_63 C 0.56385(6) 0.51686(6) 0.29608(4) 0.041 Uani 1 1 d U B . 
HA_63 H 0.5474 0.5086 0.3005 0.050 Uiso 1 1 calc R . . 
CB_63 C 0.56647(6) 0.53592(6) 0.28364(4) 0.044 Uani 1 1 d U . . 
HB1_63 H 0.5666 0.5490 0.2900 0.053 Uiso 1 1 calc R B . 
HB2_63 H 0.5817 0.5423 0.2777 0.053 Uiso 1 1 calc R . . 
CG_63 C 0.54683(6) 0.52683(6) 0.27063(4) 0.043 Uani 1 1 d U B . 
OD1_63 O 0.54727(5) 0.54088(4) 0.25972(3) 0.051 Uani 1 1 d U . . 
OD2_63 O 0.53100(4) 0.50563(4) 0.27159(3) 0.047 Uani 1 1 d U . . 
C_63 C 0.56835(6) 0.49859(6) 0.28704(4) 0.040 Uani 1 1 d U . . 
O_63 O 0.58033(5) 0.50332(4) 0.27434(3) 0.050 Uani 1 1 d U B . 
N_64 N 0.55822(5) 0.47746(5) 0.29452(3) 0.043 Uani 1 1 d U B . 
H0_64 H 0.5485 0.4745 0.3030 0.052 Uiso 1 1 calc R . . 
CA_64 C 0.56335(6) 0.45939(6) 0.28869(4) 0.043 Uani 1 1 d U . . 
HA_64 H 0.5681 0.4623 0.2766 0.051 Uiso 1 1 calc R B . 
CB_64 C 0.58352(6) 0.45997(6) 0.29891(4) 0.048 Uani 1 1 d U B . 
HB1_64 H 0.5871 0.4481 0.2942 0.057 Uiso 1 1 calc R . . 
HB2_64 H 0.5977 0.4756 0.2975 0.057 Uiso 1 1 calc R . . 
CG_64 C 0.57825(7) 0.45517(7) 0.31765(4) 0.054 Uani 1 1 d U . . 
HG1_64 H 0.5727 0.4657 0.3220 0.064 Uiso 1 1 calc R B . 
HG2_64 H 0.5653 0.4388 0.3191 0.064 Uiso 1 1 calc R . . 
CD_64 C 0.59904(7) 0.45869(8) 0.32800(5) 0.058 Uani 1 1 d U B . 
HD1_64 H 0.5941 0.4541 0.3398 0.070 Uiso 1 1 calc R . . 
HD2_64 H 0.6050 0.4486 0.3236 0.070 Uiso 1 1 calc R . . 
NE_64 N 0.61755(6) 0.48311(6) 0.32741(4) 0.053 Uani 1 1 d U . . 
HE_64 H 0.6174 0.4916 0.3189 0.063 Uiso 1 1 calc R B . 
CZ_64 C 0.63482(7) 0.49371(8) 0.33867(4) 0.057 Uani 1 1 d U B . 
NH1_64 N 0.63715(7) 0.48173(8) 0.35149(5) 0.077 Uani 1 1 d U . . 
HH1A_64 H 0.6486 0.4890 0.3588 0.092 Uiso 1 1 calc R B . 
HH1B_64 H 0.6272 0.4666 0.3526 0.092 Uiso 1 1 calc R . . 
NH2_64 N 0.64963(6) 0.51632(7) 0.33706(4) 0.062 Uani 1 1 d U . . 
HH2A_64 H 0.6481 0.5242 0.3287 0.074 Uiso 1 1 calc R B . 
HH2B_64 H 0.6611 0.5236 0.3444 0.074 Uiso 1 1 calc R . . 
C_64 C 0.54190(6) 0.43539(6) 0.29037(4) 0.042 Uani 1 1 d U B . 
O_64 O 0.52701(4) 0.43083(4) 0.30140(3) 0.049 Uani 1 1 d U . . 
N_65 N 0.54090(5) 0.41901(5) 0.27992(3) 0.044 Uani 1 1 d U . . 
H0_65 H 0.5519 0.4231 0.2722 0.053 Uiso 1 1 calc R B . 
CA_65 C 0.52223(6) 0.39467(6) 0.28097(4) 0.042 Uani 1 1 d U B . 
HA_65 H 0.5193 0.3897 0.2930 0.050 Uiso 1 1 calc R . . 
CB_65 C 0.49948(7) 0.39080(7) 0.27291(5) 0.052 Uani 1 1 d U . . 
HB1_65 H 0.4934 0.3994 0.2793 0.078 Uiso 1 1 calc R B . 
HB2_65 H 0.4878 0.3740 0.2729 0.078 Uiso 1 1 calc R . . 
HB3_65 H 0.5026 0.3966 0.2613 0.078 Uiso 1 1 calc R . . 
C_65 C 0.53016(6) 0.37954(6) 0.27140(4) 0.038 Uani 1 1 d U . . 
O_65 O 0.54602(4) 0.38816(4) 0.26074(2) 0.043 Uani 1 1 d U B . 
N_66 N 0.51774(5) 0.35666(5) 0.27461(3) 0.040 Uani 1 1 d U B . 
H0_66 H 0.5088 0.3515 0.2836 0.048 Uiso 1 1 calc R . . 
CA_66 C 0.51911(6) 0.34023(6) 0.26305(4) 0.040 Uani 1 1 d U . . 
HA_66 H 0.5248 0.3486 0.2520 0.048 Uiso 1 1 calc R B . 
CB_66 C 0.53699(6) 0.33290(6) 0.26862(4) 0.045 Uani 1 1 d U B . 
HB1_66 H 0.5407 0.3260 0.2588 0.054 Uiso 1 1 calc R . . 
HB2_66 H 0.5517 0.3472 0.2719 0.054 Uiso 1 1 calc R . . 
CG_66 C 0.52948(6) 0.31563(6) 0.28289(4) 0.045 Uani 1 1 d U . . 
CD2_66 C 0.52301(6) 0.29120(7) 0.28135(4) 0.047 Uani 1 1 d U B . 
CE2_66 C 0.51827(7) 0.28182(7) 0.29812(5) 0.053 Uani 1 1 d U . . 
CE3_66 C 0.52096(7) 0.27669(7) 0.26799(5) 0.054 Uani 1 1 d U . . 
HE3_66 H 0.5239 0.2827 0.2568 0.065 Uiso 1 1 calc R B . 
CD1_66 C 0.52841(6) 0.31960(7) 0.29977(4) 0.051 Uani 1 1 d U B . 
HD1_66 H 0.5319 0.3343 0.3045 0.061 Uiso 1 1 calc R . . 
NE1_66 N 0.52167(6) 0.29956(6) 0.30874(4) 0.055 Uani 1 1 d U B . 
HE1_66 H 0.5198 0.2983 0.3197 0.066 Uiso 1 1 calc R . . 
CZ2_66 C 0.51131(8) 0.25846(8) 0.30112(5) 0.062 Uani 1 1 d U B . 
HZ2_66 H 0.5077 0.2521 0.3122 0.074 Uiso 1 1 calc R . . 
CZ3_66 C 0.51464(8) 0.25358(8) 0.27091(5) 0.063 Uani 1 1 d U B . 
HZ3_66 H 0.5136 0.2437 0.2618 0.075 Uiso 1 1 calc R . . 
CH2_66 C 0.50977(8) 0.24462(8) 0.28725(6) 0.067 Uani 1 1 d U . . 
HH2_66 H 0.5053 0.2286 0.2890 0.080 Uiso 1 1 calc R B . 
C_66 C 0.49442(6) 0.31965(6) 0.26009(4) 0.039 Uani 1 1 d U B . 
O_66 O 0.47904(4) 0.31247(4) 0.27093(3) 0.046 Uani 1 1 d U . . 
N_67 N 0.49154(5) 0.31125(5) 0.24445(3) 0.042 Uani 1 1 d U . . 
H0_67 H 0.5033 0.3184 0.2374 0.051 Uiso 1 1 calc R B . 
CA_67 C 0.47005(6) 0.29093(6) 0.23840(4) 0.041 Uani 1 1 d U B . 
HA_67 H 0.4570 0.2874 0.2464 0.049 Uiso 1 1 calc R . . 
CB_67 C 0.46366(6) 0.29645(6) 0.22082(4) 0.046 Uani 1 1 d U . . 
HB_67 H 0.4776 0.3018 0.2133 0.056 Uiso 1 1 calc R B . 
CG1_67 C 0.44314(7) 0.27455(8) 0.21309(5) 0.061 Uani 1 1 d U B . 
HG1A_67 H 0.4472 0.2621 0.2122 0.091 Uiso 1 1 calc R . . 
HG1B_67 H 0.4398 0.2783 0.2019 0.091 Uiso 1 1 calc R . . 
HG1C_67 H 0.4292 0.2691 0.2202 0.091 Uiso 1 1 calc R . . 
CG2_67 C 0.45800(8) 0.31615(8) 0.22216(5) 0.062 Uani 1 1 d U B . 
HG2A_67 H 0.4713 0.3300 0.2272 0.093 Uiso 1 1 calc R . . 
HG2B_67 H 0.4440 0.3110 0.2292 0.093 Uiso 1 1 calc R . . 
HG2C_67 H 0.4550 0.3201 0.2109 0.093 Uiso 1 1 calc R . . 
C_67 C 0.47417(6) 0.27031(6) 0.23788(4) 0.040 Uani 1 1 d U . . 
O_67 O 0.49077(4) 0.27129(4) 0.22993(3) 0.048 Uani 1 1 d U B . 
N_68 N 0.45907(5) 0.25162(5) 0.24693(3) 0.045 Uani 1 1 d DU B . 
H0_68 H 0.4481 0.2521 0.2530 0.054 Uiso 1 1 calc R F 1 
C_68 C 0.44458(6) 0.21435(6) 0.23305(4) 0.047 Uani 1 1 d DU . . 
O_68 O 0.42351(5) 0.20867(5) 0.23172(3) 0.060 Uani 1 1 d DU . . 
CA_68 C 0.4611(3) 0.2305(3) 0.2465(2) 0.051 Uani 0.15 1 d PDU B 1 
HA_68 H 0.4776 0.2351 0.2434 0.062 Uiso 0.15 1 calc PR B 1 
CA_68 C 0.45928(8) 0.22991(9) 0.24767(6) 0.047 Uani 0.85 1 d PDU B 2 
HA1_68 H 0.4758 0.2332 0.2466 0.057 Uiso 0.85 1 calc PR B 2 
CB_68 C 0.4553(4) 0.2176(5) 0.2634(3) 0.065 Uani 0.15 1 d PDU B 1 
HB1_68 H 0.4576 0.2039 0.2626 0.078 Uiso 0.15 1 calc PR B 1 
HB2_68 H 0.4658 0.2282 0.2723 0.078 Uiso 0.15 1 calc PR B 1 
CB_68 C 0.44954(10) 0.21870(10) 0.26476(6) 0.057 Uani 0.85 1 d PDU B 2 
HB3_68 H 0.4589 0.2298 0.2738 0.068 Uiso 0.85 1 calc PR B 2 
HB4_68 H 0.4331 0.2152 0.2659 0.068 Uiso 0.85 1 calc PR B 2 
OG_68 O 0.4317(4) 0.2101(5) 0.2674(2) 0.087 Uani 0.15 1 d PDU B 1 
OG_68 O 0.45039(9) 0.19784(7) 0.26637(4) 0.079 Uani 0.85 1 d PDU B 2 
N_69 N 0.45559(5) 0.20819(6) 0.22206(3) 0.050 Uani 1 1 d DU B . 
H0_69 H 0.4698 0.2111 0.2246 0.060 Uiso 1 1 calc R . . 
CA_69 C 0.44547(7) 0.19689(7) 0.20603(4) 0.050 Uani 1 1 d U . . 
HA_69 H 0.4325 0.1999 0.2029 0.061 Uiso 1 1 calc R B . 
CB_69 C 0.46519(7) 0.20765(7) 0.19255(4) 0.052 Uani 1 1 d U B . 
HB1_69 H 0.4782 0.2052 0.1962 0.063 Uiso 1 1 calc R . . 
HB2_69 H 0.4589 0.1989 0.1819 0.063 Uiso 1 1 calc R . . 
CG_69 C 0.47497(7) 0.23343(7) 0.18913(4) 0.051 Uani 1 1 d U . . 
HG_69 H 0.4791 0.2418 0.2002 0.061 Uiso 1 1 calc R B . 
CD1_69 C 0.49748(8) 0.24257(8) 0.17888(5) 0.060 Uani 1 1 d U B . 
HD1A_69 H 0.5037 0.2592 0.1763 0.090 Uiso 1 1 calc R . . 
HD1B_69 H 0.4941 0.2336 0.1684 0.090 Uiso 1 1 calc R . . 
HD1C_69 H 0.5091 0.2407 0.1854 0.090 Uiso 1 1 calc R . . 
CD2_69 C 0.45741(8) 0.23862(8) 0.18034(6) 0.066 Uani 1 1 d U B . 
HD2A_69 H 0.4637 0.2557 0.1800 0.098 Uiso 1 1 calc R . . 
HD2B_69 H 0.4425 0.2312 0.1866 0.098 Uiso 1 1 calc R . . 
HD2C_69 H 0.4547 0.2324 0.1689 0.098 Uiso 1 1 calc R . . 
C_69 C 0.43612(7) 0.17082(8) 0.20686(5) 0.059 Uani 1 1 d U B . 
O_69 O 0.44436(6) 0.16225(6) 0.21657(4) 0.073 Uani 1 1 d U . . 
N_70 N 0.41892(7) 0.15771(6) 0.19595(4) 0.062 Uani 1 1 d U . . 
H0_70 H 0.4124 0.1641 0.1898 0.074 Uiso 1 1 calc R B . 
CA_70 C 0.41124(9) 0.13299(8) 0.19452(6) 0.072 Uani 1 1 d U B . 
HA_70 H 0.4085 0.1264 0.2062 0.086 Uiso 1 1 calc R . . 
CB_70 C 0.38818(10) 0.11945(9) 0.18503(6) 0.082 Uani 1 1 d U . . 
HB_70 H 0.3824 0.1023 0.1866 0.098 Uiso 1 1 calc R B . 
OG1_70 O 0.39330(8) 0.12480(7) 0.16742(5) 0.100 Uani 1 1 d U B . 
HG1_70 H 0.3813 0.1160 0.1617 0.150 Uiso 1 1 calc R . . 
CG2_70 C 0.36924(11) 0.12417(13) 0.19130(9) 0.105 Uani 1 1 d U B . 
HG2A_70 H 0.3547 0.1144 0.1850 0.158 Uiso 1 1 calc R . . 
HG2B_70 H 0.3743 0.1408 0.1896 0.158 Uiso 1 1 calc R . . 
HG2C_70 H 0.3665 0.1203 0.2033 0.158 Uiso 1 1 calc R . . 
C_70 C 0.43030(10) 0.12951(8) 0.18675(6) 0.075 Uani 1 1 d U . . 
O_70 O 0.44630(6) 0.14471(5) 0.17778(4) 0.072 Uani 1 1 d U B . 
N_71 N 0.42900(10) 0.10882(9) 0.18983(7) 0.101 Uani 1 1 d DU B . 
H0_71 H 0.4171 0.0979 0.1956 0.122 Uiso 1 1 calc R G 1 
C_71 C 0.44744(14) 0.10323(10) 0.16472(9) 0.115 Uani 1 1 d DU . . 
O_71 O 0.46467(11) 0.10570(9) 0.15698(8) 0.132 Uani 1 1 d DU . . 
CA_71 C 0.4473(5) 0.1044(6) 0.1837(2) 0.122 Uani 0.18 1 d PDU B 1 
HA_71 H 0.4629 0.1175 0.1875 0.147 Uiso 0.18 1 calc PR B 1 
CA_71 C 0.4473(2) 0.1043(2) 0.18342(12) 0.126 Uani 0.82 1 d PDU B 2 
HA1_71 H 0.4630 0.1170 0.1874 0.152 Uiso 0.82 1 calc PR B 2 
CB_71 C 0.4442(15) 0.0811(10) 0.1904(5) 0.191 Uani 0.18 1 d PDU B 1 
HB1_71 H 0.4284 0.0679 0.1876 0.229 Uiso 0.18 1 calc PR B 1 
HB2_71 H 0.4562 0.0779 0.1855 0.229 Uiso 0.18 1 calc PR B 1 
CB_71 C 0.4423(4) 0.0806(3) 0.1908(2) 0.207 Uani 0.82 1 d PDU B 2 
HB3_71 H 0.4549 0.0773 0.1874 0.248 Uiso 0.82 1 calc PR B 2 
HB4_71 H 0.4422 0.0812 0.2032 0.248 Uiso 0.82 1 calc PR B 2 
OG_71 O 0.4470(8) 0.0837(8) 0.2080(4) 0.203 Uani 0.18 1 d PDU B 1 
OG_71 O 0.4202(3) 0.06228(19) 0.1849(3) 0.317 Uani 0.82 1 d PDU B 2 
N_72 N 0.42811(12) 0.09956(8) 0.15643(8) 0.113 Uani 1 1 d DU B . 
H0_72 H 0.4157 0.0972 0.1622 0.136 Uiso 1 1 calc R . . 
CA_72 C 0.42698(15) 0.09931(11) 0.13797(10) 0.132 Uani 1 1 d U . . 
HA_72 H 0.4329 0.0889 0.1337 0.158 Uiso 1 1 calc R B . 
CB_72 C 0.40174(19) 0.08868(16) 0.13282(14) 0.170 Uani 1 1 d U B . 
HB1_72 H 0.3939 0.0715 0.1339 0.254 Uiso 1 1 calc R . . 
HB2_72 H 0.4009 0.0928 0.1211 0.254 Uiso 1 1 calc R . . 
HB3_72 H 0.3939 0.0948 0.1401 0.254 Uiso 1 1 calc R . . 
C_72 C 0.44139(12) 0.12309(10) 0.12994(7) 0.101 Uani 1 1 d U B . 
O_72 O 0.44483(12) 0.12406(9) 0.11478(6) 0.145 Uani 1 1 d U . . 
N_73 N 0.45007(7) 0.14234(6) 0.13935(5) 0.071 Uani 1 1 d U . . 
H0_73 H 0.4472 0.1411 0.1502 0.085 Uiso 1 1 calc R B . 
CA_73 C 0.46429(8) 0.16545(8) 0.13188(5) 0.062 Uani 1 1 d U B . 
HA_73 H 0.4566 0.1662 0.1212 0.075 Uiso 1 1 calc R . . 
CB_73 C 0.46604(8) 0.18466(7) 0.14383(5) 0.058 Uani 1 1 d U . . 
HB1_73 H 0.4757 0.1856 0.1537 0.070 Uiso 1 1 calc R B . 
HB2_73 H 0.4742 0.2000 0.1380 0.070 Uiso 1 1 calc R . . 
CG_73 C 0.44188(8) 0.18002(8) 0.14989(5) 0.064 Uani 1 1 d U B . 
HG1_73 H 0.4351 0.1664 0.1577 0.076 Uiso 1 1 calc R . . 
HG2_73 H 0.4439 0.1939 0.1562 0.076 Uiso 1 1 calc R . . 
CD_73 C 0.42506(8) 0.17514(8) 0.13580(5) 0.064 Uani 1 1 d U . . 
OE1_73 O 0.43140(6) 0.18795(6) 0.12308(4) 0.074 Uani 1 1 d U B . 
NE2_73 N 0.40362(8) 0.15740(8) 0.13781(5) 0.077 Uani 1 1 d U B . 
HE2A_73 H 0.3930 0.1541 0.1300 0.092 Uiso 1 1 calc R . . 
HE2B_73 H 0.3999 0.1488 0.1470 0.092 Uiso 1 1 calc R . . 
C_73 C 0.48881(8) 0.16972(7) 0.12778(5) 0.060 Uani 1 1 d U . . 
O_73 O 0.49723(7) 0.15945(7) 0.13554(4) 0.081 Uani 1 1 d U B . 
N_74 N 0.50024(6) 0.18534(6) 0.11562(4) 0.052 Uani 1 1 d U B . 
H0_74 H 0.4935 0.1926 0.1108 0.062 Uiso 1 1 calc R . . 
CA_74 C 0.52358(7) 0.19072(7) 0.11011(4) 0.051 Uani 1 1 d U . . 
HA_74 H 0.5277 0.1797 0.1158 0.062 Uiso 1 1 calc R B . 
CB_74 C 0.52392(9) 0.18760(8) 0.09081(5) 0.065 Uani 1 1 d U B . 
HB_74 H 0.5191 0.1981 0.0852 0.078 Uiso 1 1 calc R . . 
OG1_74 O 0.50767(9) 0.16409(7) 0.08657(4) 0.106 Uani 1 1 d U . . 
HG1_74 H 0.4947 0.1601 0.0911 0.158 Uiso 1 1 calc R B . 
CG2_74 C 0.54804(11) 0.19381(11) 0.08466(7) 0.092 Uani 1 1 d U . . 
HG2A_74 H 0.5479 0.1929 0.0723 0.138 Uiso 1 1 calc R B . 
HG2B_74 H 0.5524 0.1828 0.0894 0.138 Uiso 1 1 calc R . . 
HG2C_74 H 0.5594 0.2098 0.0882 0.138 Uiso 1 1 calc R . . 
C_74 C 0.54149(7) 0.21583(6) 0.11515(4) 0.046 Uani 1 1 d U B . 
O_74 O 0.54236(5) 0.23277(5) 0.10798(3) 0.056 Uani 1 1 d U . . 
N_75 N 0.55589(6) 0.21809(5) 0.12769(3) 0.048 Uani 1 1 d U . . 
H0_75 H 0.5544 0.2054 0.1326 0.057 Uiso 1 1 calc R B . 
CA_75 C 0.57402(6) 0.24111(6) 0.13343(4) 0.046 Uani 1 1 d U B . 
HA_75 H 0.5675 0.2520 0.1340 0.055 Uiso 1 1 calc R . . 
CB_75 C 0.58325(7) 0.23940(7) 0.15071(4) 0.047 Uani 1 1 d U . . 
HB1_75 H 0.5893 0.2283 0.1499 0.057 Uiso 1 1 calc R B . 
HB2_75 H 0.5967 0.2550 0.1537 0.057 Uiso 1 1 calc R . . 
CG_75 C 0.56536(7) 0.23134(7) 0.16493(4) 0.053 Uani 1 1 d U B . 
HG_75 H 0.5526 0.2149 0.1626 0.064 Uiso 1 1 calc R . . 
CD1_75 C 0.57765(9) 0.23146(11) 0.18139(5) 0.083 Uani 1 1 d U . . 
HD1A_75 H 0.5866 0.2234 0.1796 0.124 Uiso 1 1 calc R B . 
HD1B_75 H 0.5658 0.2233 0.1902 0.124 Uiso 1 1 calc R . . 
HD1C_75 H 0.5883 0.2477 0.1849 0.124 Uiso 1 1 calc R . . 
CD2_75 C 0.55454(11) 0.24678(10) 0.16662(7) 0.086 Uani 1 1 d U . . 
HD2A_75 H 0.5450 0.2425 0.1769 0.128 Uiso 1 1 calc R B . 
HD2B_75 H 0.5446 0.2446 0.1568 0.128 Uiso 1 1 calc R . . 
HD2C_75 H 0.5670 0.2633 0.1673 0.128 Uiso 1 1 calc R . . 
C_75 C 0.59497(6) 0.25114(6) 0.12136(4) 0.045 Uani 1 1 d U . . 
O_75 O 0.60282(6) 0.23884(5) 0.11637(3) 0.066 Uani 1 1 d U B . 
N_76 N 0.60426(6) 0.27370(5) 0.11739(3) 0.048 Uani 1 1 d U B . 
H0_76 H 0.5983 0.2819 0.1217 0.058 Uiso 1 1 calc R . . 
CA_76 C 0.62408(6) 0.28493(6) 0.10599(4) 0.046 Uani 1 1 d U . . 
HA_76 H 0.6312 0.2747 0.1046 0.055 Uiso 1 1 calc R B . 
CB_76 C 0.61569(7) 0.28874(7) 0.08840(4) 0.049 Uani 1 1 d U B . 
HB1_76 H 0.6083 0.2986 0.0898 0.059 Uiso 1 1 calc R . . 
HB2_76 H 0.6295 0.2973 0.0809 0.059 Uiso 1 1 calc R . . 
CG_76 C 0.59811(7) 0.26546(7) 0.08019(4) 0.054 Uani 1 1 d U . . 
HG_76 H 0.5854 0.2561 0.0885 0.065 Uiso 1 1 calc R B . 
CD1_76 C 0.58711(9) 0.27078(10) 0.06525(5) 0.071 Uani 1 1 d U B . 
HD1A_76 H 0.5762 0.2561 0.0595 0.106 Uiso 1 1 calc R . . 
HD1B_76 H 0.5995 0.2812 0.0574 0.106 Uiso 1 1 calc R . . 
HD1C_76 H 0.5785 0.2785 0.0692 0.106 Uiso 1 1 calc R . . 
CD2_76 C 0.60930(8) 0.25114(8) 0.07498(4) 0.060 Uani 1 1 d U B . 
HD2A_76 H 0.5972 0.2358 0.0707 0.091 Uiso 1 1 calc R . . 
HD2B_76 H 0.6171 0.2488 0.0847 0.091 Uiso 1 1 calc R . . 
HD2C_76 H 0.6210 0.2595 0.0661 0.091 Uiso 1 1 calc R . . 
C_76 C 0.64254(6) 0.30868(6) 0.11269(4) 0.043 Uani 1 1 d U B . 
O_76 O 0.63713(4) 0.32203(4) 0.11990(2) 0.044 Uani 1 1 d U . . 
N_77 N 0.66515(5) 0.31489(5) 0.10964(3) 0.043 Uani 1 1 d U . . 
CD_77 C 0.67354(7) 0.29983(7) 0.10193(5) 0.055 Uani 1 1 d U B . 
HD1_77 H 0.6674 0.2952 0.0904 0.066 Uiso 1 1 calc R . . 
HD2_77 H 0.6687 0.2855 0.1087 0.066 Uiso 1 1 calc R . . 
CA_77 C 0.68486(6) 0.33712(7) 0.11618(4) 0.045 Uani 1 1 d U B . 
HA_77 H 0.6812 0.3407 0.1276 0.054 Uiso 1 1 calc R . . 
CB_77 C 0.70503(7) 0.33185(8) 0.11696(4) 0.056 Uani 1 1 d U . . 
HB1_77 H 0.7047 0.3239 0.1276 0.067 Uiso 1 1 calc R B . 
HB2_77 H 0.7205 0.3464 0.1158 0.067 Uiso 1 1 calc R . . 
CG_77 C 0.70004(8) 0.31547(8) 0.10183(5) 0.062 Uani 1 1 d U B . 
HG1_77 H 0.7055 0.3246 0.0912 0.074 Uiso 1 1 calc R . . 
HG2_77 H 0.7079 0.3061 0.1032 0.074 Uiso 1 1 calc R . . 
C_77 C 0.69064(6) 0.35725(6) 0.10399(3) 0.039 Uani 1 1 d U . . 
O_77 O 0.71049(4) 0.36864(4) 0.09777(3) 0.046 Uani 1 1 d U B . 
N_78 N 0.67318(5) 0.36123(5) 0.10011(3) 0.038 Uani 1 1 d DU B . 
H0_78 H 0.6602 0.3544 0.1061 0.046 Uiso 1 1 calc R H 1 
C_78 C 0.66319(5) 0.39055(6) 0.09045(4) 0.040 Uani 1 1 d DU . . 
O_78 O 0.64575(4) 0.38211(5) 0.10001(3) 0.054 Uani 1 1 d DU . . 
CA_78 C 0.67494(13) 0.37644(14) 0.08641(11) 0.040 Uani 0.57 1 d PDU B 1 
HA_78 H 0.6919 0.3874 0.0838 0.048 Uiso 0.57 1 calc PR B 1 
CA_78 C 0.67812(19) 0.37888(18) 0.08693(13) 0.045 Uani 0.43 1 d PDU B 2 
HA1_78 H 0.6950 0.3913 0.0881 0.054 Uiso 0.43 1 calc PR B 2 
CB_78 C 0.66262(8) 0.36201(10) 0.07045(6) 0.033 Uani 0.57 1 d PDU B 1 
HB1_78 H 0.6456 0.3522 0.0729 0.040 Uiso 0.57 1 calc PR B 1 
HB2_78 H 0.6643 0.3731 0.0614 0.040 Uiso 0.57 1 calc PR B 1 
CB_78 C 0.6751(3) 0.3683(2) 0.06944(10) 0.103 Uani 0.43 1 d PDU B 2 
HB3_78 H 0.6602 0.3664 0.0650 0.124 Uiso 0.43 1 calc PR B 2 
HB4_78 H 0.6878 0.3805 0.0624 0.124 Uiso 0.43 1 calc PR B 2 
CG_78 C 0.6704(3) 0.34819(18) 0.06477(10) 0.127 Uani 0.57 1 d PDU B 1 
HG1_78 H 0.6645 0.3347 0.0726 0.152 Uiso 0.57 1 calc PR B 1 
HG2_78 H 0.6877 0.3571 0.0661 0.152 Uiso 0.57 1 calc PR B 1 
CG_78 C 0.67481(15) 0.34690(18) 0.06582(11) 0.045 Uani 0.43 1 d PDU B 2 
HG3_78 H 0.6640 0.3349 0.0739 0.054 Uiso 0.43 1 calc PR B 2 
HG4_78 H 0.6908 0.3494 0.0679 0.054 Uiso 0.43 1 calc PR B 2 
CD_78 C 0.6654(2) 0.3377(2) 0.04670(11) 0.074 Uani 0.57 1 d PDU B 1 
HD1_78 H 0.6500 0.3230 0.0460 0.088 Uiso 0.57 1 calc PR B 1 
HD2_78 H 0.6660 0.3491 0.0383 0.088 Uiso 0.57 1 calc PR B 1 
CD_78 C 0.6676(2) 0.3370(2) 0.04840(10) 0.042 Uani 0.43 1 d PDU B 2 
HD3_78 H 0.6515 0.3341 0.0461 0.051 Uiso 0.43 1 calc PR B 2 
HD4_78 H 0.6783 0.3487 0.0401 0.051 Uiso 0.43 1 calc PR B 2 
NE_78 N 0.68514(12) 0.33328(12) 0.04471(7) 0.075 Uani 0.57 1 d PDU B 1 
HE_78 H 0.6984 0.3448 0.0407 0.090 Uiso 0.57 1 calc PR B 1 
NE_78 N 0.66790(12) 0.31474(12) 0.04606(7) 0.046 Uani 0.43 1 d PDU B 2 
HE1_78 H 0.6547 0.3019 0.0434 0.055 Uiso 0.43 1 calc PR B 2 
CZ_78 C 0.68450(15) 0.31349(17) 0.04849(10) 0.073 Uani 0.57 1 d PDU B 1 
CZ_78 C 0.6873(2) 0.3133(2) 0.04776(11) 0.052 Uani 0.43 1 d PDU B 2 
NH1_78 N 0.66435(11) 0.29364(12) 0.05163(7) 0.069 Uani 0.57 1 d PDU B 1 
HH1A_78 H 0.6509 0.2936 0.0512 0.083 Uiso 0.57 1 calc PR B 1 
HH1B_78 H 0.6645 0.2807 0.0541 0.083 Uiso 0.57 1 calc PR B 1 
NH1_78 N 0.70783(13) 0.33263(14) 0.05001(8) 0.055 Uani 0.43 1 d PDU B 2 
HH1C_78 H 0.7207 0.3317 0.0510 0.066 Uiso 0.43 1 calc PR B 2 
HH1D_78 H 0.7086 0.3464 0.0505 0.066 Uiso 0.43 1 calc PR B 2 
NH2_78 N 0.70430(14) 0.31176(16) 0.04828(11) 0.103 Uani 0.57 1 d PDU B 1 
HH2A_78 H 0.7179 0.3240 0.0456 0.123 Uiso 0.57 1 calc PR B 1 
HH2B_78 H 0.7035 0.2984 0.0508 0.123 Uiso 0.57 1 calc PR B 1 
NH2_78 N 0.68616(17) 0.29274(14) 0.04700(9) 0.065 Uani 0.43 1 d PDU B 2 
HH2C_78 H 0.6990 0.2919 0.0480 0.078 Uiso 0.43 1 calc PR B 2 
HH2D_78 H 0.6725 0.2799 0.0455 0.078 Uiso 0.43 1 calc PR B 2 
N_79 N 0.67179(5) 0.41080(5) 0.08241(3) 0.039 Uani 1 1 d DU B . 
H0_79 H 0.6847 0.4153 0.0765 0.047 Uiso 1 1 calc R . . 
CA_79 C 0.66205(6) 0.42653(6) 0.08240(3) 0.037 Uani 1 1 d U . . 
HA_79 H 0.6465 0.4187 0.0882 0.045 Uiso 1 1 calc R B . 
CB_79 C 0.67886(6) 0.44973(6) 0.09148(4) 0.040 Uani 1 1 d U B . 
HB_79 H 0.6948 0.4564 0.0862 0.048 Uiso 1 1 calc R . . 
CG1_79 C 0.67100(6) 0.46783(6) 0.08987(4) 0.045 Uani 1 1 d U . . 
HG1A_79 H 0.6818 0.4820 0.0962 0.067 Uiso 1 1 calc R B . 
HG1B_79 H 0.6551 0.4613 0.0944 0.067 Uiso 1 1 calc R . . 
HG1C_79 H 0.6711 0.4718 0.0780 0.067 Uiso 1 1 calc R . . 
CG2_79 C 0.68102(6) 0.44509(7) 0.11008(4) 0.047 Uani 1 1 d U . . 
HG2A_79 H 0.6851 0.4327 0.1111 0.070 Uiso 1 1 calc R B . 
HG2B_79 H 0.6660 0.4401 0.1158 0.070 Uiso 1 1 calc R . . 
HG2C_79 H 0.6933 0.4595 0.1153 0.070 Uiso 1 1 calc R . . 
C_79 C 0.65869(5) 0.43130(6) 0.06401(3) 0.037 Uani 1 1 d U B . 
O_79 O 0.67416(4) 0.43545(5) 0.05344(3) 0.048 Uani 1 1 d U . . 
N_80 N 0.63910(5) 0.43131(5) 0.06032(3) 0.038 Uani 1 1 d U . . 
H0_80 H 0.6288 0.4285 0.0683 0.046 Uiso 1 1 calc R B . 
CA_80 C 0.63413(6) 0.43585(6) 0.04322(3) 0.040 Uani 1 1 d U B . 
HA_80 H 0.6364 0.4254 0.0352 0.049 Uiso 1 1 calc R . . 
CB_80 C 0.60874(6) 0.43049(7) 0.04227(4) 0.051 Uani 1 1 d U . . 
HB1_80 H 0.5981 0.4137 0.0444 0.077 Uiso 1 1 calc R B . 
HB2_80 H 0.6057 0.4346 0.0311 0.077 Uiso 1 1 calc R . . 
HB3_80 H 0.6061 0.4397 0.0508 0.077 Uiso 1 1 calc R . . 
C_80 C 0.65014(6) 0.46122(6) 0.03821(4) 0.039 Uani 1 1 d U . . 
O_80 O 0.65299(4) 0.47767(4) 0.04733(3) 0.046 Uani 1 1 d U B . 
N_81 N 0.65975(5) 0.46464(5) 0.02274(3) 0.043 Uani 1 1 d U B . 
H0_81 H 0.6580 0.4523 0.0172 0.052 Uiso 1 1 calc R . . 
CA_81 C 0.67278(7) 0.48753(6) 0.01462(4) 0.046 Uani 1 1 d U . . 
HA_81 H 0.6697 0.4991 0.0206 0.055 Uiso 1 1 calc R B . 
CB_81 C 0.69898(7) 0.49626(8) 0.01460(4) 0.057 Uani 1 1 d U B . 
HB1_81 H 0.7051 0.5006 0.0262 0.069 Uiso 1 1 calc R . . 
HB2_81 H 0.7017 0.4834 0.0108 0.069 Uiso 1 1 calc R . . 
CG_81 C 0.71230(9) 0.51733(10) 0.00324(5) 0.080 Uani 1 1 d U . . 
OD1_81 O 0.70362(7) 0.52788(6) -0.00298(4) 0.083 Uani 1 1 d U B . 
ND2_81 N 0.73455(10) 0.52198(16) -0.00030(10) 0.168 Uani 1 1 d U B . 
HD2A_81 H 0.7433 0.5332 -0.0075 0.202 Uiso 1 1 calc R . . 
HD2B_81 H 0.7401 0.5138 0.0046 0.202 Uiso 1 1 calc R . . 
C_81 C 0.66338(7) 0.48403(6) -0.00342(4) 0.043 Uani 1 1 d U B . 
O_81 O 0.67175(5) 0.47699(5) -0.01455(3) 0.050 Uani 1 1 d U . . 
N_82 N 0.64569(6) 0.48766(5) -0.00623(3) 0.050 Uani 1 1 d U . . 
H0_82 H 0.6412 0.4940 0.0016 0.060 Uiso 1 1 calc R B . 
CA_82 C 0.63370(8) 0.48125(7) -0.02233(4) 0.053 Uani 1 1 d U B . 
HA1_82 H 0.6449 0.4900 -0.0315 0.064 Uiso 1 1 calc R . . 
HA2_82 H 0.6211 0.4854 -0.0225 0.064 Uiso 1 1 calc R . . 
C_82 C 0.62319(7) 0.45503(7) -0.02504(4) 0.054 Uani 1 1 d U . . 
O_82 O 0.61120(6) 0.44111(5) -0.01376(3) 0.071 Uani 1 1 d U B . 
N_83 N 0.62747(6) 0.44821(5) -0.03976(3) 0.054 Uani 1 1 d DU B . 
H0_83 H 0.6350 0.4589 -0.0476 0.065 Uiso 1 1 calc R I 1 
C_83 C 0.63741(10) 0.41663(8) -0.03748(5) 0.074 Uani 1 1 d DU . . 
O_83 O 0.63200(11) 0.39585(7) -0.03871(6) 0.117 Uani 1 1 d DU . . 
CA_83 C 0.62019(19) 0.42380(17) -0.04346(12) 0.069 Uani 0.63 1 d PDU B 1 
HA_83 H 0.6049 0.4137 -0.0376 0.083 Uiso 0.63 1 calc PR B 1 
CA_83 C 0.6191(3) 0.4234(3) -0.04225(18) 0.067 Uani 0.37 1 d PDU B 2 
HA1_83 H 0.6050 0.4143 -0.0349 0.081 Uiso 0.37 1 calc PR B 2 
CB_83 C 0.6160(2) 0.4196(3) -0.06261(12) 0.098 Uani 0.63 1 d PDU B 1 
HB1_83 H 0.6303 0.4307 -0.0689 0.118 Uiso 0.63 1 calc PR B 1 
HB2_83 H 0.6121 0.4034 -0.0655 0.118 Uiso 0.63 1 calc PR B 1 
CB_83 C 0.6114(4) 0.4168(4) -0.06060(18) 0.122 Uani 0.37 1 d PDU B 2 
HB3_83 H 0.6064 0.4001 -0.0624 0.147 Uiso 0.37 1 calc PR B 2 
HB4_83 H 0.5978 0.4190 -0.0630 0.147 Uiso 0.37 1 calc PR B 2 
OG_83 O 0.59694(15) 0.42316(14) -0.06687(9) 0.119 Uani 0.63 1 d PDU B 1 
OG_83 O 0.6299(5) 0.4309(3) -0.07172(13) 0.239 Uani 0.37 1 d PDU B 2 
N_84 N 0.65805(7) 0.43353(6) -0.03127(4) 0.063 Uani 1 1 d DU B . 
H0_84 H 0.6605 0.4480 -0.0312 0.076 Uiso 1 1 calc R J 1 
C_84 C 0.67479(8) 0.42756(6) -0.00550(4) 0.052 Uani 1 1 d DU . . 
O_84 O 0.65791(5) 0.42627(5) 0.00240(3) 0.056 Uani 1 1 d DU . . 
CA_84 C 0.67681(17) 0.42981(16) -0.02453(10) 0.075 Uani 0.67 1 d PDU B 1 
HA_84 H 0.6742 0.4145 -0.0291 0.090 Uiso 0.67 1 calc PR B 1 
CA_84 C 0.6745(3) 0.4272(2) -0.02486(16) 0.060 Uani 0.33 1 d PDU B 2 
HA1_84 H 0.6699 0.4110 -0.0288 0.072 Uiso 0.33 1 calc PR B 2 
CB_84 C 0.7006(2) 0.4493(2) -0.03124(14) 0.120 Uani 0.67 1 d PDU B 1 
HB1_84 H 0.6997 0.4521 -0.0434 0.144 Uiso 0.67 1 calc PR B 1 
HB2_84 H 0.7062 0.4641 -0.0250 0.144 Uiso 0.67 1 calc PR B 1 
CB_84 C 0.6989(2) 0.44460(19) -0.03195(14) 0.048 Uani 0.33 1 d PDU B 2 
HB3_84 H 0.7030 0.4607 -0.0286 0.058 Uiso 0.33 1 calc PR B 2 
HB4_84 H 0.7107 0.4413 -0.0268 0.058 Uiso 0.33 1 calc PR B 2 
OG_84 O 0.71548(11) 0.43874(12) -0.02806(6) 0.091 Uani 0.67 1 d PDU B 1 
OG_84 O 0.7004(3) 0.4437(3) -0.04889(12) 0.130 Uani 0.33 1 d PDU B 2 
N_85 N 0.69291(6) 0.42756(6) 0.00190(3) 0.052 Uani 1 1 d DU B . 
H0_85 H 0.7050 0.4300 -0.0043 0.063 Uiso 1 1 calc R . . 
CA_85 C 0.69356(7) 0.42378(7) 0.01978(4) 0.052 Uani 1 1 d U . . 
HA_85 H 0.6823 0.4273 0.0257 0.063 Uiso 1 1 calc R B . 
CB_85 C 0.68675(8) 0.39762(8) 0.02309(5) 0.064 Uani 1 1 d U B . 
HB1_85 H 0.6991 0.3949 0.0183 0.077 Uiso 1 1 calc R . . 
HB2_85 H 0.6862 0.3949 0.0354 0.077 Uiso 1 1 calc R . . 
CG_85 C 0.66364(8) 0.38043(7) 0.01560(4) 0.056 Uani 1 1 d U . . 
CD1_85 C 0.64260(8) 0.37520(7) 0.02325(4) 0.055 Uani 1 1 d U B . 
HD1_85 H 0.6429 0.3820 0.0338 0.067 Uiso 1 1 calc R . . 
CD2_85 C 0.66246(9) 0.36990(7) 0.00023(5) 0.064 Uani 1 1 d U B . 
HD2_85 H 0.6767 0.3732 -0.0052 0.076 Uiso 1 1 calc R . . 
CE1_85 C 0.62115(8) 0.36018(7) 0.01577(5) 0.058 Uani 1 1 d U . . 
HE1_85 H 0.6069 0.3568 0.0212 0.070 Uiso 1 1 calc R B . 
CE2_85 C 0.64146(9) 0.35485(7) -0.00731(5) 0.068 Uani 1 1 d U . . 
HE2_85 H 0.6411 0.3477 -0.0178 0.082 Uiso 1 1 calc R B . 
CZ_85 C 0.62064(9) 0.35021(8) 0.00049(5) 0.070 Uani 1 1 d U B . 
HZ_85 H 0.6060 0.3401 -0.0048 0.084 Uiso 1 1 calc R . . 
C_85 C 0.71787(7) 0.43922(8) 0.02652(4) 0.055 Uani 1 1 d U B . 
O_85 O 0.73538(6) 0.44440(7) 0.01771(3) 0.078 Uani 1 1 d U . . 
N_86 N 0.71908(5) 0.44586(5) 0.04243(3) 0.047 Uani 1 1 d U . . 
H0_86 H 0.7061 0.4437 0.0472 0.056 Uiso 1 1 calc R B . 
CA_86 C 0.74054(6) 0.45656(7) 0.05256(4) 0.048 Uani 1 1 d U B . 
HA_86 H 0.7543 0.4609 0.0450 0.057 Uiso 1 1 calc R . . 
CB_86 C 0.74417(7) 0.47856(7) 0.06174(5) 0.058 Uani 1 1 d U . . 
HB_86 H 0.7301 0.4742 0.0689 0.070 Uiso 1 1 calc R B . 
CG1_86 C 0.76578(8) 0.48875(9) 0.07301(6) 0.068 Uani 1 1 d U B . 
HG1A_86 H 0.7674 0.5026 0.0789 0.102 Uiso 1 1 calc R . . 
HG1B_86 H 0.7798 0.4933 0.0661 0.102 Uiso 1 1 calc R . . 
HG1C_86 H 0.7641 0.4769 0.0813 0.102 Uiso 1 1 calc R . . 
CG2_86 C 0.74635(12) 0.49702(10) 0.04876(8) 0.092 Uani 1 1 d U B . 
HG2A_86 H 0.7444 0.5092 0.0545 0.138 Uiso 1 1 calc R . . 
HG2B_86 H 0.7341 0.4894 0.0402 0.138 Uiso 1 1 calc R . . 
HG2C_86 H 0.7619 0.5042 0.0434 0.138 Uiso 1 1 calc R . . 
C_86 C 0.73820(6) 0.43776(6) 0.06499(4) 0.040 Uani 1 1 d U . . 
O_86 O 0.72059(4) 0.42736(5) 0.07385(3) 0.050 Uani 1 1 d U B . 
N_87 N 0.75594(5) 0.43329(5) 0.06531(3) 0.043 Uani 1 1 d U B . 
H0_87 H 0.7679 0.4407 0.0584 0.052 Uiso 1 1 calc R . . 
CA_87 C 0.75554(6) 0.41624(6) 0.07714(4) 0.042 Uani 1 1 d U . . 
HA_87 H 0.7393 0.4022 0.0774 0.050 Uiso 1 1 calc R B . 
CB_87 C 0.77294(7) 0.40834(7) 0.07178(4) 0.048 Uani 1 1 d U B . 
HB_87 H 0.7891 0.4223 0.0714 0.057 Uiso 1 1 calc R . . 
OG1_87 O 0.76654(5) 0.39830(5) 0.05527(3) 0.055 Uani 1 1 d U . . 
HG1_87 H 0.7528 0.3953 0.0531 0.082 Uiso 1 1 calc R B . 
CG2_87 C 0.77270(8) 0.39038(8) 0.08366(4) 0.056 Uani 1 1 d U . . 
HG2A_87 H 0.7828 0.3846 0.0792 0.084 Uiso 1 1 calc R B . 
HG2B_87 H 0.7566 0.3772 0.0848 0.084 Uiso 1 1 calc R . . 
HG2C_87 H 0.7786 0.3976 0.0947 0.084 Uiso 1 1 calc R . . 
C_87 C 0.76174(6) 0.42688(6) 0.09485(4) 0.041 Uani 1 1 d U B . 
O_87 O 0.77903(5) 0.44649(5) 0.09733(3) 0.053 Uani 1 1 d U . . 
N_88 N 0.74760(5) 0.41310(5) 0.10696(3) 0.040 Uani 1 1 d U . . 
H0_88 H 0.7350 0.3998 0.1042 0.048 Uiso 1 1 calc R B . 
CA_88 C 0.75234(6) 0.41919(6) 0.12484(3) 0.039 Uani 1 1 d U B . 
HA_88 H 0.7591 0.4365 0.1263 0.047 Uiso 1 1 calc R . . 
CB_88 C 0.72954(6) 0.40582(6) 0.13498(4) 0.043 Uani 1 1 d U . . 
HB_88 H 0.7233 0.3886 0.1334 0.051 Uiso 1 1 calc R B . 
CG1_88 C 0.73457(7) 0.41146(7) 0.15371(4) 0.052 Uani 1 1 d U B . 
HG1A_88 H 0.7197 0.4043 0.1600 0.078 Uiso 1 1 calc R . . 
HG1B_88 H 0.7428 0.4285 0.1553 0.078 Uiso 1 1 calc R . . 
HG1C_88 H 0.7444 0.4052 0.1579 0.078 Uiso 1 1 calc R . . 
CG2_88 C 0.71093(6) 0.41155(7) 0.12886(4) 0.048 Uani 1 1 d U B . 
HG2A_88 H 0.6962 0.4019 0.1350 0.072 Uiso 1 1 calc R . . 
HG2B_88 H 0.7083 0.4082 0.1168 0.072 Uiso 1 1 calc R . . 
HG2C_88 H 0.7164 0.4282 0.1309 0.072 Uiso 1 1 calc R . . 
C_88 C 0.77034(6) 0.41217(6) 0.13057(4) 0.043 Uani 1 1 d U . . 
O_88 O 0.76544(5) 0.39158(5) 0.12994(3) 0.053 Uani 1 1 d U B . 
N_89 N 0.79088(5) 0.42971(6) 0.13582(3) 0.048 Uani 1 1 d DU B . 
H0_89 H 0.7928 0.4439 0.1366 0.057 Uiso 1 1 calc R K 1 
CA_89 C 0.81035(18) 0.4260(2) 0.14032(11) 0.060 Uani 0.63 1 d PDU B 1 
HA_89 H 0.8056 0.4093 0.1375 0.072 Uiso 0.63 1 calc PR B 1 
CA_89 C 0.8105(3) 0.4267(2) 0.14034(17) 0.047 Uani 0.37 1 d PDU B 2 
HA1_89 H 0.8067 0.4106 0.1369 0.056 Uiso 0.37 1 calc PR B 2 
CB_89 C 0.83240(19) 0.4422(2) 0.12965(12) 0.063 Uani 0.63 1 d PDU B 1 
HB1_89 H 0.8368 0.4588 0.1317 0.076 Uiso 0.63 1 calc PR B 1 
HB2_89 H 0.8457 0.4402 0.1334 0.076 Uiso 0.63 1 calc PR B 1 
CB_89 C 0.8324(3) 0.4446(3) 0.1306(2) 0.062 Uani 0.37 1 d PDU B 2 
HB3_89 H 0.8354 0.4606 0.1329 0.075 Uiso 0.37 1 calc PR B 2 
HB4_89 H 0.8462 0.4436 0.1346 0.075 Uiso 0.37 1 calc PR B 2 
CG_89 C 0.82882(13) 0.43731(18) 0.11087(9) 0.056 Uani 0.63 1 d PDU B 1 
HG1_89 H 0.8148 0.4382 0.1074 0.067 Uiso 0.63 1 calc PR B 1 
HG2_89 H 0.8254 0.4210 0.1088 0.067 Uiso 0.63 1 calc PR B 1 
CG_89 C 0.8300(4) 0.4405(5) 0.1119(3) 0.119 Uani 0.37 1 d PDU B 2 
HG3_89 H 0.8191 0.4454 0.1072 0.142 Uiso 0.37 1 calc PR B 2 
HG4_89 H 0.8237 0.4237 0.1094 0.142 Uiso 0.37 1 calc PR B 2 
CD_89 C 0.84954(11) 0.45391(16) 0.09963(8) 0.065 Uani 0.63 1 d PDU B 1 
HD1_89 H 0.8458 0.4489 0.0877 0.078 Uiso 0.63 1 calc PR B 1 
HD2_89 H 0.8521 0.4701 0.1006 0.078 Uiso 0.63 1 calc PR B 1 
CD_89 C 0.8544(3) 0.4552(5) 0.1040(2) 0.160 Uani 0.37 1 d PDU B 2 
HD3_89 H 0.8530 0.4574 0.0919 0.192 Uiso 0.37 1 calc PR B 2 
HD4_89 H 0.8629 0.4708 0.1095 0.192 Uiso 0.37 1 calc PR B 2 
NE_89 N 0.87112(9) 0.45381(13) 0.10453(7) 0.072 Uani 0.63 1 d PDU B 1 
HE_89 H 0.8734 0.4428 0.1003 0.086 Uiso 0.63 1 calc PR B 1 
NE_89 N 0.8673(3) 0.4424(5) 0.1066(2) 0.195 Uani 0.37 1 d PDU B 2 
HE1_89 H 0.8618 0.4286 0.1018 0.234 Uiso 0.37 1 calc PR B 2 
CZ_89 C 0.88714(12) 0.46903(15) 0.11480(8) 0.077 Uani 0.63 1 d PDU B 1 
CZ_89 C 0.8869(3) 0.4504(4) 0.1159(2) 0.132 Uani 0.37 1 d PDU B 2 
NH1_89 N 0.90522(11) 0.46617(18) 0.11901(8) 0.095 Uani 0.63 1 d PDU B 1 
HH1A_89 H 0.9159 0.4759 0.1261 0.115 Uiso 0.63 1 calc PR B 1 
HH1B_89 H 0.9065 0.4545 0.1146 0.115 Uiso 0.63 1 calc PR B 1 
NH1_89 N 0.8959(4) 0.4369(4) 0.1168(3) 0.165 Uani 0.37 1 d PDU B 2 
HH1C_89 H 0.9090 0.4415 0.1224 0.199 Uiso 0.37 1 calc PR B 2 
HH1D_89 H 0.8888 0.4230 0.1119 0.199 Uiso 0.37 1 calc PR B 2 
NH2_89 N 0.88548(11) 0.48631(14) 0.12132(8) 0.084 Uani 0.63 1 d PDU B 1 
HH2A_89 H 0.8734 0.4880 0.1189 0.101 Uiso 0.63 1 calc PR B 1 
HH2B_89 H 0.8965 0.4963 0.1282 0.101 Uiso 0.63 1 calc PR B 1 
NH2_89 N 0.8964(5) 0.4714(4) 0.1229(3) 0.191 Uani 0.37 1 d PDU B 2 
HH2C_89 H 0.9096 0.4769 0.1286 0.230 Uiso 0.37 1 calc PR B 2 
HH2D_89 H 0.8896 0.4800 0.1219 0.230 Uiso 0.37 1 calc PR B 2 
C_89 C 0.81626(7) 0.42957(7) 0.15891(5) 0.057 Uani 1 1 d DU . . 
O_89 O 0.82963(6) 0.42314(7) 0.16467(4) 0.080 Uani 1 1 d DU B . 
N_90 N 0.80701(6) 0.43930(6) 0.16858(4) 0.055 Uani 1 1 d DU B . 
H0_90 H 0.7972 0.4432 0.1641 0.066 Uiso 1 1 calc R . . 
CA_90 C 0.81242(7) 0.44368(8) 0.18639(5) 0.057 Uani 1 1 d U . . 
HA1_90 H 0.8297 0.4519 0.1880 0.069 Uiso 1 1 calc R B . 
HA2_90 H 0.8054 0.4286 0.1925 0.069 Uiso 1 1 calc R . . 
C_90 C 0.80270(6) 0.45858(7) 0.19323(4) 0.045 Uani 1 1 d U B . 
O_90 O 0.78974(4) 0.46270(4) 0.18452(3) 0.046 Uani 1 1 d U . . 
N_91 N 0.80946(5) 0.46653(6) 0.20882(3) 0.047 Uani 1 1 d U . . 
H0_91 H 0.8197 0.4637 0.2138 0.057 Uiso 1 1 calc R B . 
CA_91 C 0.80070(6) 0.47960(7) 0.21790(4) 0.050 Uani 1 1 d U B . 
HA_91 H 0.7923 0.4844 0.2097 0.060 Uiso 1 1 calc R . . 
CB_91 C 0.78302(8) 0.46407(10) 0.23139(6) 0.078 Uani 1 1 d U . . 
HB1_91 H 0.7784 0.4737 0.2383 0.093 Uiso 1 1 calc R B . 
HB2_91 H 0.7687 0.4515 0.2259 0.093 Uiso 1 1 calc R . . 
OG_91 O 0.79318(8) 0.45377(8) 0.24196(4) 0.100 Uani 1 1 d U B . 
HG_91 H 0.7943 0.4588 0.2518 0.150 Uiso 1 1 calc R . . 
C_91 C 0.82050(6) 0.50182(7) 0.22600(4) 0.047 Uani 1 1 d U . . 
O_91 O 0.81683(4) 0.51003(5) 0.23896(3) 0.054 Uani 1 1 d U B . 
N_92 N 0.84131(5) 0.51252(6) 0.21835(4) 0.048 Uani 1 1 d U B . 
H0_92 H 0.8436 0.5062 0.2093 0.058 Uiso 1 1 calc R . . 
CA_92 C 0.86008(6) 0.53446(7) 0.22484(4) 0.052 Uani 1 1 d U . . 
HA_92 H 0.8631 0.5324 0.2369 0.063 Uiso 1 1 calc R B . 
CB_92 C 0.88250(6) 0.54258(8) 0.21454(5) 0.055 Uani 1 1 d U B . 
HB_92 H 0.8788 0.5445 0.2026 0.067 Uiso 1 1 calc R . . 
OG1_92 O 0.88901(5) 0.52490(6) 0.21468(4) 0.066 Uani 1 1 d U . . 
HG1_92 H 0.8925 0.5232 0.2245 0.098 Uiso 1 1 calc R B . 
CG2_92 C 0.90262(7) 0.56625(9) 0.22034(6) 0.072 Uani 1 1 d U . . 
HG2A_92 H 0.9163 0.5710 0.2130 0.109 Uiso 1 1 calc R B . 
HG2B_92 H 0.9068 0.5649 0.2320 0.109 Uiso 1 1 calc R . . 
HG2C_92 H 0.8977 0.5781 0.2198 0.109 Uiso 1 1 calc R . . 
C_92 C 0.85335(6) 0.55364(7) 0.22358(4) 0.048 Uani 1 1 d U B . 
O_92 O 0.84779(5) 0.55806(5) 0.20974(3) 0.056 Uani 1 1 d U . . 
N_93 N 0.85488(5) 0.56560(6) 0.23744(4) 0.053 Uani 1 1 d DU . . 
H0_93 H 0.8598 0.5625 0.2469 0.064 Uiso 1 1 calc R B 1 
CA_93 C 0.84840(13) 0.58395(13) 0.23714(10) 0.060 Uani 0.74 1 d PDU B 1 
HA_93 H 0.8342 0.5786 0.2298 0.072 Uiso 0.74 1 calc PR B 1 
CA_93 C 0.8496(2) 0.5846(3) 0.2376(2) 0.051 Uani 0.26 1 d PDU B 2 
HA1_93 H 0.8347 0.5795 0.2312 0.061 Uiso 0.26 1 calc PR B 2 
CB_93 C 0.84203(11) 0.58671(11) 0.25531(7) 0.057 Uani 0.74 1 d PDU B 1 
HB1_93 H 0.8291 0.5715 0.2594 0.068 Uiso 0.74 1 calc PR B 1 
HB2_93 H 0.8558 0.5915 0.2627 0.068 Uiso 0.74 1 calc PR B 1 
CB_93 C 0.8478(4) 0.5940(3) 0.2548(2) 0.083 Uani 0.26 1 d PDU B 2 
HB3_93 H 0.8617 0.5974 0.2618 0.099 Uiso 0.26 1 calc PR B 2 
HB4_93 H 0.8473 0.6087 0.2535 0.099 Uiso 0.26 1 calc PR B 2 
CG_93 C 0.83452(12) 0.60502(12) 0.25606(7) 0.069 Uani 0.74 1 d PDU B 1 
HG1_93 H 0.8234 0.6020 0.2467 0.083 Uiso 0.74 1 calc PR B 1 
HG2_93 H 0.8485 0.6207 0.2541 0.083 Uiso 0.74 1 calc PR B 1 
CG_93 C 0.8259(3) 0.5757(3) 0.26309(19) 0.077 Uani 0.26 1 d PDU B 2 
HG3_93 H 0.8127 0.5711 0.2552 0.092 Uiso 0.26 1 calc PR B 2 
HG4_93 H 0.8275 0.5616 0.2650 0.092 Uiso 0.26 1 calc PR B 2 
CD_93 C 0.82308(12) 0.60582(12) 0.27240(7) 0.074 Uani 0.74 1 d PDU B 1 
CD_93 C 0.8198(3) 0.5823(3) 0.27914(18) 0.081 Uani 0.26 1 d PDU B 2 
OE1_93 O 0.81084(13) 0.58713(12) 0.28002(7) 0.107 Uani 0.74 1 d PDU B 1 
OE1_93 O 0.8339(3) 0.6001(3) 0.28708(15) 0.097 Uani 0.26 1 d PDU B 2 
OE2_93 O 0.82333(9) 0.62465(9) 0.27593(5) 0.081 Uani 0.74 1 d PDU B 1 
OE2_93 O 0.7995(3) 0.5698(3) 0.28494(17) 0.102 Uani 0.26 1 d PDU B 2 
C_93 C 0.86872(6) 0.60655(7) 0.22980(5) 0.057 Uani 1 1 d DU . . 
O_93 O 0.88892(5) 0.61561(6) 0.23562(4) 0.079 Uani 1 1 d DU B . 
N_94 N 0.86306(5) 0.61623(6) 0.21756(4) 0.054 Uani 1 1 d DU B . 
H0_94 H 0.8484 0.6091 0.2141 0.065 Uiso 1 1 calc R . . 
CA_94 C 0.87973(7) 0.63803(8) 0.20941(5) 0.057 Uani 1 1 d U . . 
HA_94 H 0.8951 0.6384 0.2083 0.068 Uiso 1 1 calc R B . 
CB_94 C 0.87092(8) 0.63913(8) 0.19197(5) 0.064 Uani 1 1 d U B . 
HB1_94 H 0.8683 0.6253 0.1855 0.095 Uiso 1 1 calc R . . 
HB2_94 H 0.8827 0.6535 0.1863 0.095 Uiso 1 1 calc R . . 
HB3_94 H 0.8561 0.6393 0.1929 0.095 Uiso 1 1 calc R . . 
C_94 C 0.88366(7) 0.65930(8) 0.21991(5) 0.060 Uani 1 1 d U B . 
O_94 O 0.86817(5) 0.65843(6) 0.22913(4) 0.075 Uani 1 1 d U . . 
N_95 N 0.90431(6) 0.67852(7) 0.21786(5) 0.067 Uani 1 1 d U . . 
H0_95 H 0.9144 0.6780 0.2109 0.080 Uiso 1 1 calc R B . 
CA_95 C 0.91120(8) 0.70055(9) 0.22658(6) 0.070 Uani 1 1 d U B . 
HA_95 H 0.9041 0.6969 0.2381 0.084 Uiso 1 1 calc R . . 
CB_95 C 0.93814(9) 0.71448(11) 0.22834(7) 0.087 Uani 1 1 d U . . 
HB1_95 H 0.9436 0.7043 0.2331 0.131 Uiso 1 1 calc R B . 
HB2_95 H 0.9427 0.7280 0.2358 0.131 Uiso 1 1 calc R . . 
HB3_95 H 0.9453 0.7200 0.2172 0.131 Uiso 1 1 calc R . . 
C_95 C 0.90293(8) 0.71527(8) 0.21744(6) 0.071 Uani 1 1 d U . . 
O_95 O 0.89780(6) 0.71270(6) 0.20232(4) 0.077 Uani 1 1 d U B . 
N_96 N 0.90223(7) 0.73215(7) 0.22665(5) 0.075 Uani 1 1 d U B . 
H0_96 H 0.9037 0.7321 0.2377 0.090 Uiso 1 1 calc R . . 
CA_96 C 0.89907(8) 0.75020(9) 0.21893(7) 0.079 Uani 1 1 d U . . 
HA_96 H 0.8830 0.7426 0.2139 0.094 Uiso 1 1 calc R B . 
CB_96 C 0.90084(10) 0.76829(10) 0.23202(8) 0.093 Uani 1 1 d U B . 
HB_96 H 0.9161 0.7744 0.2382 0.111 Uiso 1 1 calc R . . 
CG1_96 C 0.90062(16) 0.78872(14) 0.22361(11) 0.122 Uani 1 1 d U . . 
HG1A_96 H 0.9012 0.7997 0.2322 0.183 Uiso 1 1 calc R B . 
HG1B_96 H 0.8862 0.7830 0.2170 0.183 Uiso 1 1 calc R . . 
HG1C_96 H 0.9143 0.7968 0.2162 0.183 Uiso 1 1 calc R . . 
CG2_96 C 0.88084(12) 0.75677(14) 0.24482(10) 0.115 Uani 1 1 d U . . 
HG2A_96 H 0.8823 0.7685 0.2531 0.172 Uiso 1 1 calc R B . 
HG2B_96 H 0.8817 0.7440 0.2506 0.172 Uiso 1 1 calc R . . 
HG2C_96 H 0.8657 0.7504 0.2390 0.172 Uiso 1 1 calc R . . 
C_96 C 0.91687(8) 0.76175(10) 0.20492(7) 0.083 Uani 1 1 d U B . 
O_96 O 0.93765(6) 0.76740(8) 0.20663(6) 0.099 Uani 1 1 d U . . 
N_97 N 0.90811(7) 0.76461(8) 0.19054(6) 0.087 Uani 1 1 d U . . 
H0_97 H 0.8932 0.7606 0.1903 0.105 Uiso 1 1 calc R B . 
CA_97 C 0.92195(11) 0.77397(12) 0.17525(8) 0.100 Uani 1 1 d U B . 
HA1_97 H 0.9388 0.7831 0.1783 0.120 Uiso 1 1 calc R . . 
HA2_97 H 0.9177 0.7850 0.1699 0.120 Uiso 1 1 calc R . . 
C_97 C 0.91863(10) 0.75573(12) 0.16272(8) 0.100 Uani 1 1 d U . . 
O_97 O 0.92446(10) 0.76154(10) 0.14771(6) 0.137 Uani 1 1 d U B . 
N_98 N 0.90917(7) 0.73350(8) 0.16748(6) 0.082 Uani 1 1 d U B . 
H0_98 H 0.9052 0.7298 0.1781 0.098 Uiso 1 1 calc R . . 
CA_98 C 0.90525(8) 0.71520(11) 0.15563(6) 0.080 Uani 1 1 d U . . 
HA_98 H 0.9200 0.7199 0.1492 0.095 Uiso 1 1 calc R B . 
CB_98 C 0.89806(10) 0.69239(11) 0.16503(6) 0.082 Uani 1 1 d U B . 
HB1_98 H 0.9110 0.6945 0.1724 0.124 Uiso 1 1 calc R . . 
HB2_98 H 0.8945 0.6798 0.1569 0.124 Uiso 1 1 calc R . . 
HB3_98 H 0.8841 0.6882 0.1719 0.124 Uiso 1 1 calc R . . 
C_98 C 0.88554(8) 0.71053(9) 0.14346(6) 0.069 Uani 1 1 d U B . 
O_98 O 0.86858(6) 0.71241(7) 0.14758(4) 0.080 Uani 1 1 d U . . 
N_99 N 0.88789(6) 0.70380(8) 0.12830(5) 0.072 Uani 1 1 d U . . 
H0_99 H 0.9015 0.7053 0.1254 0.087 Uiso 1 1 calc R B . 
CA_99 C 0.86859(7) 0.69394(9) 0.11607(6) 0.070 Uani 1 1 d U B . 
HA_99 H 0.8618 0.7046 0.1153 0.084 Uiso 1 1 calc R . . 
CB_99 C 0.87757(9) 0.69228(11) 0.09899(6) 0.086 Uani 1 1 d U . . 
HB1_99 H 0.8899 0.7079 0.0954 0.130 Uiso 1 1 calc R B . 
HB2_99 H 0.8646 0.6861 0.0909 0.130 Uiso 1 1 calc R . . 
HB3_99 H 0.8841 0.6818 0.0996 0.130 Uiso 1 1 calc R . . 
C_99 C 0.84939(8) 0.66981(9) 0.12237(7) 0.074 Uani 1 1 d U . . 
O_99 O 0.85446(6) 0.65657(7) 0.12988(6) 0.100 Uani 1 1 d U B . 
N_100 N 0.82761(6) 0.66408(6) 0.11869(5) 0.063 Uani 1 1 d U B . 
H0_100 H 0.8250 0.6743 0.1134 0.075 Uiso 1 1 calc R . . 
CA_100 C 0.80794(7) 0.64131(7) 0.12315(5) 0.057 Uani 1 1 d U . . 
HA_100 H 0.8127 0.6291 0.1217 0.068 Uiso 1 1 calc R B . 
CB_100 C 0.80058(7) 0.64118(8) 0.14169(6) 0.064 Uani 1 1 d U B . 
HB_100 H 0.8152 0.6481 0.1486 0.077 Uiso 1 1 calc R . . 
CG1_100 C 0.78985(8) 0.65705(9) 0.14391(6) 0.072 Uani 1 1 d U . . 
HG1A_100 H 0.8011 0.6730 0.1401 0.108 Uiso 1 1 calc R B . 
HG1B_100 H 0.7862 0.6575 0.1558 0.108 Uiso 1 1 calc R . . 
HG1C_100 H 0.7754 0.6508 0.1373 0.108 Uiso 1 1 calc R . . 
CG2_100 C 0.78440(8) 0.61638(9) 0.14827(6) 0.071 Uani 1 1 d U . . 
HG2A_100 H 0.7916 0.6066 0.1462 0.106 Uiso 1 1 calc R B . 
HG2B_100 H 0.7692 0.6096 0.1425 0.106 Uiso 1 1 calc R . . 
HG2C_100 H 0.7820 0.6170 0.1604 0.106 Uiso 1 1 calc R . . 
C_100 C 0.78803(7) 0.63602(7) 0.11092(5) 0.058 Uani 1 1 d U B . 
O_100 O 0.78621(5) 0.65205(5) 0.10400(4) 0.070 Uani 1 1 d U . . 
N_101 N 0.77266(5) 0.61343(6) 0.10845(4) 0.052 Uani 1 1 d U . . 
H0_101 H 0.7752 0.6029 0.1133 0.062 Uiso 1 1 calc R B . 
CA_101 C 0.75209(6) 0.60540(7) 0.09817(5) 0.052 Uani 1 1 d U B . 
HA_101 H 0.7508 0.6193 0.0948 0.062 Uiso 1 1 calc R . . 
C_101 C 0.73011(6) 0.58870(6) 0.10820(4) 0.043 Uani 1 1 d U . . 
O_101 O 0.73157(4) 0.57997(5) 0.12159(3) 0.055 Uani 1 1 d U B . 
CB_101 C 0.75358(8) 0.59319(9) 0.08226(6) 0.074 Uani 1 1 d DU . . 
HB1_101 H 0.7395 0.5887 0.0753 0.089 Uiso 1 1 calc R B . 
HB2_101 H 0.7535 0.5786 0.0855 0.089 Uiso 1 1 calc R . . 
SG_101 S 0.77980(3) 0.61148(3) 0.069734(19) 0.091 Uani 1 1 d DU B . 
N_102 N 0.70984(5) 0.58422(5) 0.10132(3) 0.043 Uani 1 1 d U B . 
H0_102 H 0.7099 0.5914 0.0920 0.051 Uiso 1 1 calc R . . 
CA_102 C 0.68748(5) 0.56754(5) 0.10909(4) 0.038 Uani 1 1 d U . . 
HA_102 H 0.6899 0.5560 0.1157 0.045 Uiso 1 1 calc R B . 
CB_102 C 0.67851(6) 0.57954(6) 0.12109(4) 0.041 Uani 1 1 d U B . 
HB1_102 H 0.6888 0.5851 0.1311 0.049 Uiso 1 1 calc R . . 
HB2_102 H 0.6625 0.5678 0.1249 0.049 Uiso 1 1 calc R . . 
CG_102 C 0.67765(6) 0.60054(6) 0.11320(4) 0.047 Uani 1 1 d U . . 
HG1_102 H 0.6925 0.6152 0.1157 0.056 Uiso 1 1 calc R B . 
HG2_102 H 0.6764 0.5986 0.1008 0.056 Uiso 1 1 calc R . . 
CD_102 C 0.65704(6) 0.60279(6) 0.11970(4) 0.047 Uani 1 1 d U B . 
HD1_102 H 0.6579 0.6040 0.1321 0.056 Uiso 1 1 calc R . . 
HD2_102 H 0.6582 0.6174 0.1152 0.056 Uiso 1 1 calc R . . 
NE_102 N 0.63443(5) 0.58277(5) 0.11480(3) 0.045 Uani 1 1 d U . . 
HE_102 H 0.6255 0.5729 0.1226 0.054 Uiso 1 1 calc R B . 
CZ_102 C 0.62682(6) 0.57890(6) 0.09888(4) 0.043 Uani 1 1 d U B . 
NH1_102 N 0.63552(6) 0.59595(5) 0.08774(3) 0.049 Uani 1 1 d U . . 
HH1A_102 H 0.6303 0.5932 0.0773 0.058 Uiso 1 1 calc R B . 
HH1B_102 H 0.6466 0.6101 0.0907 0.058 Uiso 1 1 calc R . . 
NH2_102 N 0.61027(5) 0.55764(5) 0.09441(4) 0.048 Uani 1 1 d U . . 
HH2A_102 H 0.6051 0.5549 0.0840 0.058 Uiso 1 1 calc R B . 
HH2B_102 H 0.6044 0.5462 0.1019 0.058 Uiso 1 1 calc R . . 
C_102 C 0.66995(6) 0.55426(6) 0.09512(4) 0.039 Uani 1 1 d U B . 
O_102 O 0.67231(5) 0.56224(4) 0.08096(3) 0.052 Uani 1 1 d U . . 
N_103 N 0.65182(4) 0.53334(5) 0.09986(3) 0.036 Uani 1 1 d U . . 
H0_103 H 0.6502 0.5294 0.1106 0.044 Uiso 1 1 calc R B . 
CA_103 C 0.63482(5) 0.51711(5) 0.08776(3) 0.035 Uani 1 1 d U B . 
HA_103 H 0.6360 0.5256 0.0770 0.042 Uiso 1 1 calc R . . 
CB_103 C 0.64056(6) 0.49744(6) 0.08445(4) 0.040 Uani 1 1 d U . . 
HB1_103 H 0.6573 0.5045 0.0812 0.048 Uiso 1 1 calc R B . 
HB2_103 H 0.6381 0.4883 0.0949 0.048 Uiso 1 1 calc R . . 
OG_103 O 0.62633(4) 0.48218(4) 0.07150(3) 0.045 Uani 1 1 d U B . 
HG_103 H 0.6346 0.4790 0.0652 0.067 Uiso 1 1 calc R . . 
C_103 C 0.61026(5) 0.50692(5) 0.09505(3) 0.034 Uani 1 1 d U . . 
O_103 O 0.60655(4) 0.50026(4) 0.10988(2) 0.040 Uani 1 1 d U B . 
N_104 N 0.59338(4) 0.50573(5) 0.08501(3) 0.036 Uani 1 1 d U B . 
H0_104 H 0.5967 0.5106 0.0745 0.044 Uiso 1 1 calc R . . 
CA_104 C 0.56971(6) 0.49660(6) 0.09116(4) 0.040 Uani 1 1 d U . . 
HA1_104 H 0.5694 0.5078 0.0993 0.048 Uiso 1 1 calc R B . 
HA2_104 H 0.5646 0.4815 0.0970 0.048 Uiso 1 1 calc R . . 
C_104 C 0.55299(6) 0.49277(6) 0.07681(4) 0.041 Uani 1 1 d U B . 
O_104 O 0.56005(4) 0.50074(5) 0.06261(3) 0.053 Uani 1 1 d U . . 
N_105 N 0.53023(5) 0.48038(5) 0.08086(3) 0.042 Uani 1 1 d DU . . 
H0_105 H 0.5260 0.4779 0.0915 0.050 Uiso 1 1 calc R B 1 
CA_105 C 0.51218(13) 0.47087(14) 0.06760(9) 0.048 Uani 0.74 1 d PDU B 1 
HA_105 H 0.5187 0.4655 0.0584 0.057 Uiso 0.74 1 calc PR B 1 
CA_105 C 0.5117(3) 0.4711(3) 0.0683(2) 0.049 Uani 0.26 1 d PDU B 2 
HA1_105 H 0.5161 0.4632 0.0594 0.059 Uiso 0.26 1 calc PR B 2 
CB_105 C 0.49013(11) 0.44897(11) 0.07384(8) 0.057 Uani 0.74 1 d PDU B 1 
HB1_105 H 0.4945 0.4369 0.0765 0.068 Uiso 0.74 1 calc PR B 1 
HB2_105 H 0.4788 0.4428 0.0644 0.068 Uiso 0.74 1 calc PR B 1 
CB_105 C 0.4888(3) 0.4524(3) 0.0766(2) 0.059 Uani 0.26 1 d PDU B 2 
HB3_105 H 0.4777 0.4423 0.0678 0.071 Uiso 0.26 1 calc PR B 2 
HB4_105 H 0.4923 0.4422 0.0839 0.071 Uiso 0.26 1 calc PR B 2 
CG_105 C 0.47704(9) 0.45121(10) 0.08931(7) 0.053 Uani 0.74 1 d PDU B 1 
HG1_105 H 0.4657 0.4352 0.0934 0.064 Uiso 0.74 1 calc PR B 1 
HG2_105 H 0.4886 0.4594 0.0984 0.064 Uiso 0.74 1 calc PR B 1 
CG_105 C 0.4774(2) 0.4629(3) 0.0870(2) 0.072 Uani 0.26 1 d PDU B 2 
HG3_105 H 0.4729 0.4718 0.0793 0.087 Uiso 0.26 1 calc PR B 2 
HG4_105 H 0.4895 0.4744 0.0948 0.087 Uiso 0.26 1 calc PR B 2 
CD_105 C 0.46379(9) 0.46437(11) 0.08603(8) 0.064 Uani 0.74 1 d PDU B 1 
HD1_105 H 0.4563 0.4653 0.0966 0.077 Uiso 0.74 1 calc PR B 1 
HD2_105 H 0.4750 0.4806 0.0823 0.077 Uiso 0.74 1 calc PR B 1 
CD_105 C 0.4561(3) 0.4469(3) 0.0974(2) 0.077 Uani 0.26 1 d PDU B 2 
HD3_105 H 0.4449 0.4335 0.0903 0.093 Uiso 0.26 1 calc PR B 2 
HD4_105 H 0.4610 0.4404 0.1068 0.093 Uiso 0.26 1 calc PR B 2 
NE_105 N 0.44597(8) 0.45282(9) 0.07331(7) 0.071 Uani 0.74 1 d PDU B 1 
HE_105 H 0.4407 0.4378 0.0716 0.085 Uiso 0.74 1 calc PR B 1 
NE_105 N 0.4443(2) 0.4590(3) 0.10419(19) 0.085 Uani 0.26 1 d PDU B 2 
HE1_105 H 0.4473 0.4638 0.1147 0.102 Uiso 0.26 1 calc PR B 2 
CZ_105 C 0.43683(11) 0.46296(13) 0.06401(9) 0.089 Uani 0.74 1 d PDU B 1 
CZ_105 C 0.4294(2) 0.4633(3) 0.0958(2) 0.085 Uani 0.26 1 d PDU B 2 
NH1_105 N 0.41977(12) 0.44970(14) 0.05339(10) 0.111 Uani 0.74 1 d PDU B 1 
HH1A_105 H 0.4148 0.4346 0.0527 0.133 Uiso 0.74 1 calc PR B 1 
HH1B_105 H 0.4134 0.4560 0.0471 0.133 Uiso 0.74 1 calc PR B 1 
NH1_105 N 0.4201(3) 0.4750(3) 0.1029(2) 0.094 Uani 0.26 1 d PDU B 2 
HH1C_105 H 0.4239 0.4801 0.1133 0.113 Uiso 0.26 1 calc PR B 2 
HH1D_105 H 0.4102 0.4778 0.0971 0.113 Uiso 0.26 1 calc PR B 2 
NH2_105 N 0.44471(13) 0.48615(12) 0.06515(12) 0.117 Uani 0.74 1 d PDU B 1 
HH2A_105 H 0.4385 0.4926 0.0588 0.140 Uiso 0.74 1 calc PR B 1 
HH2B_105 H 0.4561 0.4949 0.0722 0.140 Uiso 0.74 1 calc PR B 1 
NH2_105 N 0.4241(3) 0.4555(4) 0.0801(2) 0.102 Uani 0.26 1 d PDU B 2 
HH2C_105 H 0.4143 0.4581 0.0742 0.123 Uiso 0.26 1 calc PR B 2 
HH2D_105 H 0.4304 0.4477 0.0756 0.123 Uiso 0.26 1 calc PR B 2 
C_105 C 0.50713(7) 0.48904(7) 0.05979(4) 0.052 Uani 1 1 d DU . . 
O_105 O 0.49439(6) 0.48305(6) 0.04721(4) 0.075 Uani 1 1 d DU B . 
N_106 N 0.51566(5) 0.50987(5) 0.06708(3) 0.048 Uani 1 1 d DU B . 
H0_106 H 0.5243 0.5131 0.0762 0.057 Uiso 1 1 calc R . . 
CA_106 C 0.51082(7) 0.52770(7) 0.06008(5) 0.053 Uani 1 1 d U . . 
HA_106 H 0.4963 0.5193 0.0530 0.063 Uiso 1 1 calc R B . 
CB_106 C 0.50553(8) 0.54027(8) 0.07437(5) 0.059 Uani 1 1 d U B . 
HB_106 H 0.5187 0.5469 0.0827 0.071 Uiso 1 1 calc R . . 
OG1_106 O 0.48483(6) 0.52233(6) 0.08205(5) 0.077 Uani 1 1 d U . . 
HG1_106 H 0.4801 0.5283 0.0893 0.115 Uiso 1 1 calc R B . 
CG2_106 C 0.50163(9) 0.55973(9) 0.06756(6) 0.074 Uani 1 1 d U . . 
HG2A_106 H 0.4992 0.5679 0.0770 0.112 Uiso 1 1 calc R B . 
HG2B_106 H 0.4878 0.5529 0.0602 0.112 Uiso 1 1 calc R . . 
HG2C_106 H 0.5154 0.5709 0.0611 0.112 Uiso 1 1 calc R . . 
C_106 C 0.53032(7) 0.54530(7) 0.04893(5) 0.055 Uani 1 1 d U B . 
O_106 O 0.52593(6) 0.54913(7) 0.03463(4) 0.081 Uani 1 1 d U . . 
N_107 N 0.55202(6) 0.55625(6) 0.05523(3) 0.049 Uani 1 1 d U . . 
H0_107 H 0.5545 0.5527 0.0654 0.059 Uiso 1 1 calc R B . 
CA_107 C 0.57170(7) 0.57405(7) 0.04556(4) 0.053 Uani 1 1 d U B . 
HA_107 H 0.5650 0.5781 0.0357 0.064 Uiso 1 1 calc R . . 
CB_107 C 0.58624(8) 0.59662(7) 0.05553(5) 0.058 Uani 1 1 d DU . . 
HB_107 H 0.5988 0.6082 0.0479 0.070 Uiso 1 1 calc R B . 
OG1_107 O 0.59755(5) 0.59236(5) 0.06927(3) 0.060 Uani 1 1 d DU B . 
HG1_107 H 0.5881 0.5867 0.0774 0.089 Uiso 1 1 calc RD . . 
CG2_107 C 0.57165(9) 0.60751(8) 0.06161(5) 0.064 Uani 1 1 d U B . 
HG2A_107 H 0.5817 0.6218 0.0681 0.096 Uiso 1 1 calc R . . 
HG2B_107 H 0.5587 0.5962 0.0687 0.096 Uiso 1 1 calc R . . 
HG2C_107 H 0.5652 0.6116 0.0519 0.096 Uiso 1 1 calc R . . 
C_107 C 0.58780(7) 0.56567(8) 0.03874(4) 0.057 Uani 1 1 d U . . 
O_107 O 0.60528(6) 0.57934(6) 0.03033(4) 0.077 Uani 1 1 d U B . 
N_108 N 0.58241(6) 0.54373(6) 0.04144(4) 0.054 Uani 1 1 d U B . 
H0_108 H 0.5697 0.5343 0.0473 0.065 Uiso 1 1 calc R . . 
CA_108 C 0.59705(8) 0.53490(9) 0.03497(4) 0.059 Uani 1 1 d U . . 
HA1_108 H 0.6001 0.5388 0.0229 0.071 Uiso 1 1 calc R B . 
HA2_108 H 0.5886 0.5176 0.0361 0.071 Uiso 1 1 calc R . . 
C_108 C 0.62037(7) 0.54523(7) 0.04427(4) 0.051 Uani 1 1 d U B . 
O_108 O 0.62118(5) 0.54798(6) 0.05976(3) 0.062 Uani 1 1 d U . . 
N_109 N 0.63861(6) 0.54951(6) 0.03479(3) 0.053 Uani 1 1 d U . . 
H0_109 H 0.6366 0.5478 0.0238 0.064 Uiso 1 1 calc R B . 
CA_109 C 0.66208(7) 0.55693(7) 0.04153(4) 0.051 Uani 1 1 d U B . 
HA_109 H 0.6608 0.5528 0.0537 0.061 Uiso 1 1 calc R . . 
CB_109 C 0.67265(7) 0.54413(8) 0.03204(5) 0.058 Uani 1 1 d U . . 
HB1_109 H 0.6609 0.5271 0.0318 0.069 Uiso 1 1 calc R B . 
HB2_109 H 0.6757 0.5498 0.0203 0.069 Uiso 1 1 calc R . . 
CG_109 C 0.69514(7) 0.54727(7) 0.03940(5) 0.055 Uani 1 1 d U B . 
CD1_109 C 0.71681(9) 0.56257(10) 0.03303(6) 0.076 Uani 1 1 d U . . 
HD1_109 H 0.7177 0.5722 0.0238 0.092 Uiso 1 1 calc R B . 
CE1_109 C 0.73737(9) 0.56480(11) 0.03920(9) 0.094 Uani 1 1 d U B . 
HE1_109 H 0.7521 0.5757 0.0343 0.112 Uiso 1 1 calc R . . 
CD2_109 C 0.69440(9) 0.53372(8) 0.05290(6) 0.069 Uani 1 1 d U . . 
HD2_109 H 0.6796 0.5228 0.0576 0.083 Uiso 1 1 calc R B . 
CE2_109 C 0.71480(11) 0.53566(10) 0.05977(7) 0.088 Uani 1 1 d U B . 
HE2_109 H 0.7139 0.5265 0.0693 0.106 Uiso 1 1 calc R . . 
CZ_109 C 0.73619(11) 0.55089(11) 0.05266(9) 0.095 Uani 1 1 d U . . 
OH_109 O 0.75549(10) 0.55164(10) 0.05992(9) 0.157 Uani 1 1 d U B . 
HH_109 H 0.7672 0.5592 0.0537 0.235 Uiso 1 1 calc R . . 
C_109 C 0.67693(8) 0.58352(8) 0.03959(4) 0.056 Uani 1 1 d U . . 
O_109 O 0.68015(8) 0.59256(6) 0.02546(3) 0.086 Uani 1 1 d U B . 
N_110 N 0.68521(6) 0.59591(6) 0.05349(3) 0.052 Uani 1 1 d U B . 
H0_110 H 0.6829 0.5882 0.0630 0.062 Uiso 1 1 calc R . . 
CA_110 C 0.69791(7) 0.62138(7) 0.05413(4) 0.056 Uani 1 1 d U . . 
HA_110 H 0.7024 0.6277 0.0424 0.067 Uiso 1 1 calc R B . 
CB_110 C 0.68324(8) 0.63089(8) 0.06208(5) 0.064 Uani 1 1 d U B . 
HB1_110 H 0.6793 0.6249 0.0737 0.076 Uiso 1 1 calc R . . 
HB2_110 H 0.6929 0.6482 0.0627 0.076 Uiso 1 1 calc R . . 
CG_110 C 0.66069(9) 0.62436(9) 0.05271(6) 0.071 Uani 1 1 d U . . 
HG1_110 H 0.6517 0.6071 0.0512 0.085 Uiso 1 1 calc R B . 
HG2_110 H 0.6511 0.6289 0.0596 0.085 Uiso 1 1 calc R . . 
CD_110 C 0.66449(11) 0.63568(11) 0.03591(7) 0.092 Uani 1 1 d U B . 
OE1_110 O 0.68284(9) 0.65461(9) 0.03267(7) 0.122 Uani 1 1 d U . . 
NE2_110 N 0.64700(12) 0.62567(13) 0.02525(7) 0.135 Uani 1 1 d U . . 
HE2A_110 H 0.6479 0.6323 0.0154 0.162 Uiso 1 1 calc R B . 
HE2B_110 H 0.6343 0.6124 0.0279 0.162 Uiso 1 1 calc R . . 
C_110 C 0.72023(8) 0.62986(7) 0.06466(5) 0.058 Uani 1 1 d U B . 
O_110 O 0.71922(5) 0.61919(5) 0.07756(3) 0.069 Uani 1 1 d U . . 
N_111 N 0.73900(7) 0.64958(6) 0.06009(4) 0.066 Uani 1 1 d U . . 
H0_111 H 0.7380 0.6577 0.0516 0.080 Uiso 1 1 calc R B . 
CA_111 C 0.76107(8) 0.65821(8) 0.06861(5) 0.066 Uani 1 1 d U B . 
HA_111 H 0.7581 0.6482 0.0788 0.079 Uiso 1 1 calc R . . 
C_111 C 0.77065(8) 0.68353(8) 0.07463(5) 0.066 Uani 1 1 d U . . 
O_111 O 0.76457(7) 0.69703(6) 0.06805(5) 0.091 Uani 1 1 d U B . 
CB_111 C 0.77942(11) 0.65651(11) 0.05808(7) 0.091 Uani 1 1 d DU . . 
HB1_111 H 0.7940 0.6622 0.0648 0.109 Uiso 1 1 calc R B . 
HB2_111 H 0.7832 0.6669 0.0481 0.109 Uiso 1 1 calc R . . 
SG_111 S 0.76980(3) 0.62661(3) 0.050926(19) 0.099 Uani 1 1 d DU B . 
N_112 N 0.78547(6) 0.68979(6) 0.08738(4) 0.061 Uani 1 1 d U B . 
H0_112 H 0.7883 0.6792 0.0919 0.073 Uiso 1 1 calc R . . 
CA_112 C 0.79728(8) 0.71351(8) 0.09427(6) 0.065 Uani 1 1 d U . . 
HA1_112 H 0.7858 0.7166 0.1001 0.078 Uiso 1 1 calc R B . 
HA2_112 H 0.8047 0.7251 0.0851 0.078 Uiso 1 1 calc R . . 
C_112 C 0.81602(7) 0.71560(7) 0.10676(5) 0.062 Uani 1 1 d U B . 
O_112 O 0.82661(5) 0.70475(6) 0.10405(4) 0.067 Uani 1 1 d U . . 
N_113 N 0.81981(7) 0.72934(7) 0.11981(5) 0.070 Uani 1 1 d DU . . 
H0_113 H 0.8120 0.7369 0.1208 0.084 Uiso 1 1 calc R B 1 
C_113 C 0.82609(7) 0.73027(8) 0.15000(6) 0.069 Uani 1 1 d DU . . 
O_113 O 0.80918(6) 0.73331(7) 0.15241(4) 0.080 Uani 1 1 d DU B . 
CA_113 C 0.83698(17) 0.73214(17) 0.13276(14) 0.065 Uani 0.51 1 d PDU B 1 
HA_113 H 0.8401 0.7188 0.1316 0.078 Uiso 0.51 1 calc PR B 1 
CA_113 C 0.8375(2) 0.7353(2) 0.13279(15) 0.074 Uani 0.49 1 d PDU B 2 
HA1_113 H 0.8451 0.7254 0.1312 0.089 Uiso 0.49 1 calc PR B 2 
CB_113 C 0.86086(15) 0.75534(16) 0.13220(13) 0.076 Uani 0.51 1 d PDU B 1 
HB_113 H 0.8707 0.7558 0.1420 0.092 Uiso 0.51 1 calc PR B 1 
CB_113 C 0.85612(18) 0.7614(2) 0.13000(13) 0.090 Uani 0.49 1 d PDU B 2 
HB1_113 H 0.8488 0.7712 0.1326 0.108 Uiso 0.49 1 calc PR B 2 
OG1_113 O 0.85575(13) 0.77416(12) 0.13382(10) 0.089 Uani 0.51 1 d PDU B 1 
OG1_113 O 0.8621(2) 0.76397(19) 0.11195(11) 0.124 Uani 0.49 1 d PDU B 2 
CG2_113 C 0.8743(2) 0.7580(2) 0.11598(14) 0.097 Uani 0.51 1 d PDU B 1 
CG2_113 C 0.8769(2) 0.7690(3) 0.14121(17) 0.127 Uani 0.49 1 d PDU B 2 
N_114 N 0.83624(6) 0.72483(7) 0.16207(4) 0.066 Uani 1 1 d DU B . 
H0_114 H 0.8471 0.7214 0.1593 0.079 Uiso 1 1 calc R . . 
CA_114 C 0.83033(7) 0.72428(8) 0.17971(5) 0.064 Uani 1 1 d U . . 
HA_114 H 0.8130 0.7175 0.1808 0.077 Uiso 1 1 calc R B . 
CB_114 C 0.83762(8) 0.70904(9) 0.18996(6) 0.069 Uani 1 1 d U B . 
HB_114 H 0.8549 0.7156 0.1885 0.083 Uiso 1 1 calc R . . 
CG2_114 C 0.83254(8) 0.70994(10) 0.20876(6) 0.077 Uani 1 1 d U . . 
HG2A_114 H 0.8418 0.7262 0.2128 0.116 Uiso 1 1 calc R B . 
HG2B_114 H 0.8368 0.6999 0.2151 0.116 Uiso 1 1 calc R . . 
HG2C_114 H 0.8158 0.7044 0.2103 0.116 Uiso 1 1 calc R . . 
CG1_114 C 0.82504(11) 0.68417(10) 0.18307(9) 0.094 Uani 1 1 d U . . 
HG1A_114 H 0.8288 0.6847 0.1710 0.113 Uiso 1 1 calc R B . 
HG1B_114 H 0.8079 0.6778 0.1840 0.113 Uiso 1 1 calc R . . 
CD1_114 C 0.83140(15) 0.66762(14) 0.19195(15) 0.141 Uani 1 1 d U B . 
HD1A_114 H 0.8264 0.6535 0.1851 0.212 Uiso 1 1 calc R . . 
HD1B_114 H 0.8235 0.6631 0.2029 0.212 Uiso 1 1 calc R . . 
HD1C_114 H 0.8485 0.6755 0.1936 0.212 Uiso 1 1 calc R . . 
C_114 C 0.84261(7) 0.74918(8) 0.18624(6) 0.068 Uani 1 1 d U B . 
O_114 O 0.86412(5) 0.76163(6) 0.18521(5) 0.082 Uani 1 1 d U . . 
N_115 N 0.82909(6) 0.75671(7) 0.19329(5) 0.071 Uani 1 1 d U . . 
H0_115 H 0.8140 0.7466 0.1946 0.085 Uiso 1 1 calc R B . 
CA_115 C 0.83803(9) 0.78086(9) 0.19895(7) 0.078 Uani 1 1 d U B . 
HA_115 H 0.8547 0.7899 0.1949 0.094 Uiso 1 1 calc R . . 
CB_115 C 0.82512(12) 0.79171(12) 0.19002(8) 0.096 Uani 1 1 d U . . 
HB_115 H 0.8312 0.8080 0.1944 0.115 Uiso 1 1 calc R B . 
OG1_115 O 0.80091(8) 0.77790(9) 0.19437(6) 0.108 Uani 1 1 d U B . 
HG1_115 H 0.7927 0.7801 0.1873 0.162 Uiso 1 1 calc R . . 
CG2_115 C 0.82820(13) 0.79284(13) 0.17125(9) 0.108 Uani 1 1 d U B . 
HG2A_115 H 0.8171 0.7967 0.1660 0.163 Uiso 1 1 calc R . . 
HG2B_115 H 0.8253 0.7776 0.1671 0.163 Uiso 1 1 calc R . . 
HG2C_115 H 0.8443 0.8050 0.1684 0.163 Uiso 1 1 calc R . . 
C_115 C 0.83910(9) 0.78401(9) 0.21776(7) 0.076 Uani 1 1 d U . . 
O_115 O 0.85278(8) 0.80357(7) 0.22365(5) 0.099 Uani 1 1 d U B . 
N_116 N 0.82488(7) 0.76586(7) 0.22772(5) 0.070 Uani 1 1 d U B . 
H0_116 H 0.8153 0.7521 0.2232 0.084 Uiso 1 1 calc R . . 
CA_116 C 0.82508(8) 0.76863(8) 0.24596(6) 0.070 Uani 1 1 d U . . 
HA_116 H 0.8418 0.7774 0.2499 0.084 Uiso 1 1 calc R B . 
CB_116 C 0.81261(11) 0.78193(10) 0.25152(7) 0.086 Uani 1 1 d U B . 
HB1_116 H 0.8211 0.7980 0.2471 0.128 Uiso 1 1 calc R . . 
HB2_116 H 0.8123 0.7824 0.2638 0.128 Uiso 1 1 calc R . . 
HB3_116 H 0.7965 0.7739 0.2472 0.128 Uiso 1 1 calc R . . 
C_116 C 0.81300(7) 0.74446(8) 0.25395(6) 0.064 Uani 1 1 d U B . 
O_116 O 0.79857(5) 0.72709(5) 0.24561(4) 0.070 Uani 1 1 d U . . 
N_117 N 0.81788(6) 0.74347(7) 0.26972(5) 0.068 Uani 1 1 d U . . 
H0_117 H 0.8289 0.7564 0.2745 0.082 Uiso 1 1 calc R B . 
CA_117 C 0.80620(7) 0.72208(8) 0.28006(5) 0.064 Uani 1 1 d U B . 
HA_117 H 0.7930 0.7098 0.2732 0.077 Uiso 1 1 calc R . . 
CB_117 C 0.82218(8) 0.71252(9) 0.28446(6) 0.070 Uani 1 1 d U . . 
HB1_117 H 0.8142 0.6997 0.2928 0.084 Uiso 1 1 calc R B . 
HB2_117 H 0.8367 0.7251 0.2898 0.084 Uiso 1 1 calc R . . 
CG_117 C 0.82887(8) 0.70317(9) 0.26905(6) 0.069 Uani 1 1 d U B . 
HG1_117 H 0.8143 0.6915 0.2632 0.083 Uiso 1 1 calc R . . 
HG2_117 H 0.8379 0.7163 0.2611 0.083 Uiso 1 1 calc R . . 
CD_117 C 0.84329(11) 0.69186(12) 0.27351(7) 0.090 Uani 1 1 d U . . 
HD1_117 H 0.8341 0.6784 0.2812 0.107 Uiso 1 1 calc R B . 
HD2_117 H 0.8577 0.7034 0.2795 0.107 Uiso 1 1 calc R . . 
CE_117 C 0.85023(10) 0.68314(10) 0.25788(7) 0.084 Uani 1 1 d U B . 
HE1_117 H 0.8359 0.6726 0.2514 0.101 Uiso 1 1 calc R . . 
HE2_117 H 0.8605 0.6967 0.2506 0.101 Uiso 1 1 calc R . . 
NZ_117 N 0.86254(12) 0.67063(12) 0.26224(7) 0.112 Uani 1 1 d U . . 
HZ1_117 H 0.8669 0.6662 0.2527 0.169 Uiso 1 1 calc R B . 
HZ2_117 H 0.8529 0.6576 0.2684 0.169 Uiso 1 1 calc R . . 
HZ3_117 H 0.8755 0.6802 0.2684 0.169 Uiso 1 1 calc R . . 
C_117 C 0.79539(7) 0.72619(8) 0.29546(6) 0.066 Uani 1 1 d U . . 
O_117 O 0.80149(6) 0.74639(6) 0.30073(4) 0.080 Uani 1 1 d U B . 
N_118 N 0.77985(6) 0.70717(7) 0.30342(4) 0.063 Uani 1 1 d U B . 
H0_118 H 0.7759 0.6934 0.2989 0.076 Uiso 1 1 calc R . . 
CA_118 C 0.76879(8) 0.70747(9) 0.31931(6) 0.070 Uani 1 1 d U . . 
HA_118 H 0.7573 0.6907 0.3221 0.084 Uiso 1 1 calc R B . 
CB_118 C 0.78609(10) 0.71704(13) 0.33378(6) 0.094 Uani 1 1 d U B . 
HB1_118 H 0.7978 0.7118 0.3325 0.113 Uiso 1 1 calc R . . 
HB2_118 H 0.7946 0.7344 0.3334 0.113 Uiso 1 1 calc R . . 
CG_118 C 0.77418(15) 0.70904(18) 0.35043(8) 0.127 Uani 1 1 d U . . 
OD1_118 O 0.75476(15) 0.68962(14) 0.35210(7) 0.184 Uani 1 1 d U B . 
ND2_118 N 0.78444(17) 0.7215(2) 0.36368(9) 0.194 Uani 1 1 d U B . 
HD2A_118 H 0.7781 0.7166 0.3737 0.232 Uiso 1 1 calc R . . 
HD2B_118 H 0.7978 0.7349 0.3627 0.232 Uiso 1 1 calc R . . 
C_118 C 0.75452(8) 0.71996(8) 0.31779(6) 0.068 Uani 1 1 d U B . 
O_118 O 0.75450(7) 0.73257(7) 0.32953(5) 0.090 Uani 1 1 d U . . 
N_119 N 0.74164(6) 0.71586(7) 0.30412(5) 0.065 Uani 1 1 d U . . 
H0_119 H 0.7418 0.7061 0.2966 0.078 Uiso 1 1 calc R B . 
CA_119 C 0.72737(7) 0.72642(8) 0.30073(6) 0.065 Uani 1 1 d U B . 
HA_119 H 0.7346 0.7421 0.3064 0.078 Uiso 1 1 calc R . . 
CB_119 C 0.72664(9) 0.72996(9) 0.28167(6) 0.076 Uani 1 1 d U . . 
HB_119 H 0.7200 0.7142 0.2761 0.091 Uiso 1 1 calc R B . 
CG1_119 C 0.71106(12) 0.74021(12) 0.27716(8) 0.097 Uani 1 1 d U B . 
HG1A_119 H 0.6948 0.7291 0.2803 0.146 Uiso 1 1 calc R . . 
HG1B_119 H 0.7119 0.7431 0.2650 0.146 Uiso 1 1 calc R . . 
HG1C_119 H 0.7165 0.7550 0.2832 0.146 Uiso 1 1 calc R . . 
CG2_119 C 0.75167(12) 0.74553(13) 0.27513(8) 0.103 Uani 1 1 d U B . 
HG2A_119 H 0.7511 0.7511 0.2638 0.155 Uiso 1 1 calc R . . 
HG2B_119 H 0.7598 0.7364 0.2748 0.155 Uiso 1 1 calc R . . 
HG2C_119 H 0.7602 0.7590 0.2826 0.155 Uiso 1 1 calc R . . 
C_119 C 0.70265(8) 0.71098(8) 0.30770(6) 0.065 Uani 1 1 d U . . 
O_119 O 0.69208(5) 0.68991(5) 0.30571(4) 0.070 Uani 1 1 d U B . 
N_120 N 0.69297(7) 0.72266(7) 0.31503(6) 0.076 Uani 1 1 d U B . 
H0_120 H 0.7015 0.7380 0.3163 0.091 Uiso 1 1 calc R . . 
CA_120 C 0.66874(9) 0.71054(10) 0.32082(7) 0.078 Uani 1 1 d U . . 
HA_120 H 0.6634 0.6935 0.3226 0.093 Uiso 1 1 calc R B . 
CB_120 C 0.66675(10) 0.72138(12) 0.33728(8) 0.095 Uani 1 1 d U B . 
HB_120 H 0.6733 0.7387 0.3357 0.114 Uiso 1 1 calc R . . 
OG1_120 O 0.68029(8) 0.71750(10) 0.34931(5) 0.114 Uani 1 1 d U . . 
HG1_120 H 0.6923 0.7187 0.3447 0.172 Uiso 1 1 calc R B . 
CG2_120 C 0.64076(12) 0.70994(17) 0.34339(10) 0.126 Uani 1 1 d U . . 
HG2A_120 H 0.6403 0.7164 0.3544 0.189 Uiso 1 1 calc R B . 
HG2B_120 H 0.6340 0.6929 0.3443 0.189 Uiso 1 1 calc R . . 
HG2C_120 H 0.6316 0.7134 0.3353 0.189 Uiso 1 1 calc R . . 
C_120 C 0.65322(9) 0.71281(9) 0.30755(8) 0.081 Uani 1 1 d U B . 
O_120 O 0.65840(7) 0.73188(7) 0.30063(7) 0.105 Uani 1 1 d U . . 
N_121 N 0.63335(7) 0.69275(7) 0.30379(5) 0.072 Uani 1 1 d U . . 
H0_121 H 0.6317 0.6794 0.3076 0.086 Uiso 1 1 calc R B . 
CA_121 C 0.61463(8) 0.69190(9) 0.29381(6) 0.071 Uani 1 1 d U B . 
HA_121 H 0.6205 0.7071 0.2876 0.085 Uiso 1 1 calc R . . 
CB_121 C 0.60498(10) 0.67130(12) 0.28120(7) 0.091 Uani 1 1 d U . . 
HB1_121 H 0.6177 0.6731 0.2738 0.137 Uiso 1 1 calc R B . 
HB2_121 H 0.5925 0.6713 0.2745 0.137 Uiso 1 1 calc R . . 
HB3_121 H 0.5986 0.6564 0.2874 0.137 Uiso 1 1 calc R . . 
C_121 C 0.59455(8) 0.68797(9) 0.30554(6) 0.068 Uani 1 1 d U . . 
O_121 O 0.58769(7) 0.67287(7) 0.31644(5) 0.090 Uani 1 1 d U B . 
N_122 N 0.58467(6) 0.70103(7) 0.30260(5) 0.066 Uani 1 1 d U B . 
H0_122 H 0.5905 0.7118 0.2946 0.079 Uiso 1 1 calc R . . 
CA_122 C 0.56446(8) 0.69811(9) 0.31215(6) 0.068 Uani 1 1 d U . . 
HA_122 H 0.5626 0.6884 0.3223 0.082 Uiso 1 1 calc R B . 
CB_122 C 0.56835(11) 0.72182(11) 0.31794(9) 0.096 Uani 1 1 d U B . 
HB1_122 H 0.5545 0.7196 0.3244 0.115 Uiso 1 1 calc R . . 
HB2_122 H 0.5702 0.7317 0.3080 0.115 Uiso 1 1 calc R . . 
CG_122 C 0.59031(15) 0.73407(16) 0.32896(12) 0.132 Uani 1 1 d U . . 
OD1_122 O 0.59046(12) 0.72391(15) 0.34228(9) 0.159 Uani 1 1 d U B . 
ND2_122 N 0.60731(19) 0.75339(19) 0.32375(17) 0.239 Uani 1 1 d U B . 
HD2A_122 H 0.6204 0.7606 0.3296 0.287 Uiso 1 1 calc R . . 
HD2B_122 H 0.6060 0.7596 0.3143 0.287 Uiso 1 1 calc R . . 
C_122 C 0.54271(8) 0.68487(8) 0.30122(6) 0.066 Uani 1 1 d U B . 
O_122 O 0.53527(8) 0.69508(8) 0.29251(6) 0.102 Uani 1 1 d U . . 
N_123 N 0.53255(6) 0.66169(7) 0.30124(4) 0.063 Uani 1 1 d U . . 
H0_123 H 0.5383 0.6550 0.3078 0.075 Uiso 1 1 calc R B . 
CA_123 C 0.51246(7) 0.64710(8) 0.29092(6) 0.062 Uani 1 1 d U B . 
HA_123 H 0.5143 0.6551 0.2799 0.074 Uiso 1 1 calc R . . 
CB_123 C 0.51060(8) 0.62312(8) 0.28777(6) 0.066 Uani 1 1 d U . . 
HB1_123 H 0.5096 0.6156 0.2988 0.079 Uiso 1 1 calc R B . 
HB2_123 H 0.4958 0.6130 0.2816 0.079 Uiso 1 1 calc R . . 
CG_123 C 0.53073(8) 0.62421(8) 0.27792(5) 0.060 Uani 1 1 d U B . 
CD1_123 C 0.54018(8) 0.61046(8) 0.28268(5) 0.061 Uani 1 1 d U . . 
HD1_123 H 0.5347 0.6014 0.2927 0.073 Uiso 1 1 calc R B . 
CE1_123 C 0.55751(8) 0.60956(8) 0.27319(5) 0.059 Uani 1 1 d U B . 
HE1_123 H 0.5638 0.6000 0.2768 0.071 Uiso 1 1 calc R . . 
CD2_123 C 0.53990(10) 0.63775(9) 0.26326(6) 0.074 Uani 1 1 d U . . 
HD2_123 H 0.5340 0.6476 0.2596 0.089 Uiso 1 1 calc R B . 
CE2_123 C 0.55731(11) 0.63702(10) 0.25398(6) 0.080 Uani 1 1 d U B . 
HE2_123 H 0.5636 0.6466 0.2443 0.096 Uiso 1 1 calc R . . 
CZ_123 C 0.56551(8) 0.62224(8) 0.25885(5) 0.062 Uani 1 1 d U . . 
OH_123 O 0.58310(6) 0.62253(6) 0.24917(4) 0.074 Uani 1 1 d U B . 
HH_123 H 0.5830 0.6098 0.2504 0.110 Uiso 1 1 calc R . . 
C_123 C 0.48997(8) 0.64348(8) 0.29925(5) 0.064 Uani 1 1 d U . . 
O_123 O 0.48932(5) 0.64798(6) 0.31436(4) 0.073 Uani 1 1 d U B . 
N_124 N 0.47058(7) 0.63325(7) 0.28989(5) 0.070 Uani 1 1 d U B . 
H0_124 H 0.4714 0.6296 0.2794 0.084 Uiso 1 1 calc R . . 
CA_124 C 0.44824(8) 0.62817(10) 0.29684(6) 0.071 Uani 1 1 d U . . 
HA_124 H 0.4487 0.6434 0.2990 0.085 Uiso 1 1 calc R B . 
CB_124 C 0.42879(9) 0.61410(12) 0.28371(7) 0.086 Uani 1 1 d U B . 
HB1_124 H 0.4303 0.6244 0.2743 0.128 Uiso 1 1 calc R . . 
HB2_124 H 0.4133 0.6080 0.2890 0.128 Uiso 1 1 calc R . . 
HB3_124 H 0.4304 0.6009 0.2795 0.128 Uiso 1 1 calc R . . 
C_124 C 0.44271(8) 0.61473(9) 0.31313(6) 0.070 Uani 1 1 d U B . 
O_124 O 0.43323(6) 0.61846(6) 0.32509(4) 0.075 Uani 1 1 d U . . 
N_125 N 0.44780(6) 0.59713(7) 0.31387(5) 0.065 Uani 1 1 d U . . 
H0_125 H 0.4559 0.5957 0.3056 0.078 Uiso 1 1 calc R B . 
CA_125 C 0.44073(7) 0.58071(8) 0.32749(5) 0.065 Uani 1 1 d U B . 
HA_125 H 0.4247 0.5770 0.3312 0.078 Uiso 1 1 calc R . . 
CB_125 C 0.43914(9) 0.55775(9) 0.32123(6) 0.075 Uani 1 1 d U . . 
HB1_125 H 0.4340 0.5463 0.3306 0.089 Uiso 1 1 calc R B . 
HB2_125 H 0.4549 0.5610 0.3177 0.089 Uiso 1 1 calc R . . 
CG_125 C 0.42189(10) 0.54679(12) 0.30637(9) 0.106 Uani 1 1 d U B . 
HG1_125 H 0.4157 0.5296 0.3065 0.127 Uiso 1 1 calc R . . 
HG2_125 H 0.4084 0.5494 0.3083 0.127 Uiso 1 1 calc R . . 
CD_125 C 0.43162(15) 0.55583(17) 0.28933(8) 0.114 Uani 1 1 d U . . 
OE1_125 O 0.45106(9) 0.57186(9) 0.28708(5) 0.101 Uani 1 1 d U B . 
OE2_125 O 0.41874(13) 0.54651(19) 0.27595(8) 0.197 Uani 1 1 d U B . 
C_125 C 0.45718(7) 0.58961(8) 0.34274(5) 0.060 Uani 1 1 d U . . 
O_125 O 0.45084(5) 0.57885(6) 0.35631(4) 0.069 Uani 1 1 d U B . 
N_126 N 0.47810(6) 0.60843(7) 0.34057(4) 0.060 Uani 1 1 d U B . 
H0_126 H 0.4814 0.6155 0.3307 0.072 Uiso 1 1 calc R . . 
CA_126 C 0.49571(7) 0.61794(8) 0.35346(5) 0.061 Uani 1 1 d U . . 
HA1_126 H 0.4932 0.6053 0.3615 0.073 Uiso 1 1 calc R B . 
HA2_126 H 0.4943 0.6302 0.3598 0.073 Uiso 1 1 calc R . . 
C_126 C 0.52002(7) 0.62850(8) 0.34582(5) 0.059 Uani 1 1 d U B . 
O_126 O 0.52316(5) 0.62716(6) 0.33077(3) 0.069 Uani 1 1 d U . . 
N_127 N 0.53796(6) 0.63951(6) 0.35679(4) 0.058 Uani 1 1 d U . . 
H0_127 H 0.5350 0.6410 0.3674 0.070 Uiso 1 1 calc R B . 
CA_127 C 0.56211(7) 0.64897(8) 0.35136(5) 0.060 Uani 1 1 d U B . 
HA_127 H 0.5649 0.6587 0.3410 0.072 Uiso 1 1 calc R . . 
CB_127 C 0.57885(8) 0.66431(10) 0.36528(6) 0.078 Uani 1 1 d U . . 
HB1_127 H 0.5758 0.6771 0.3680 0.117 Uiso 1 1 calc R B . 
HB2_127 H 0.5951 0.6710 0.3614 0.117 Uiso 1 1 calc R . . 
HB3_127 H 0.5764 0.6547 0.3754 0.117 Uiso 1 1 calc R . . 
C_127 C 0.56738(7) 0.62939(7) 0.34761(4) 0.053 Uani 1 1 d U . . 
O_127 O 0.55892(5) 0.61133(5) 0.35621(3) 0.060 Uani 1 1 d U B . 
N_128 N 0.58280(5) 0.63380(6) 0.33526(4) 0.053 Uani 1 1 d U B . 
H0_128 H 0.5862 0.6457 0.3285 0.064 Uiso 1 1 calc R . . 
CA_128 C 0.59440(6) 0.62023(7) 0.33225(4) 0.050 Uani 1 1 d U . . 
HA_128 H 0.5902 0.6085 0.3415 0.060 Uiso 1 1 calc R B . 
CB_128 C 0.58705(7) 0.60707(7) 0.31537(4) 0.051 Uani 1 1 d U B . 
HB_128 H 0.5895 0.6186 0.3062 0.061 Uiso 1 1 calc R . . 
CG1_128 C 0.60201(7) 0.59581(7) 0.31160(5) 0.055 Uani 1 1 d U . . 
HG1A_128 H 0.5967 0.5869 0.3011 0.082 Uiso 1 1 calc R B . 
HG1B_128 H 0.6004 0.5852 0.3208 0.082 Uiso 1 1 calc R . . 
HG1C_128 H 0.6185 0.6081 0.3105 0.082 Uiso 1 1 calc R . . 
CG2_128 C 0.56105(7) 0.58832(7) 0.31591(5) 0.054 Uani 1 1 d U . . 
HG2A_128 H 0.5518 0.5955 0.3193 0.081 Uiso 1 1 calc R B . 
HG2B_128 H 0.5587 0.5761 0.3241 0.081 Uiso 1 1 calc R . . 
HG2C_128 H 0.5560 0.5812 0.3047 0.081 Uiso 1 1 calc R . . 
C_128 C 0.62062(7) 0.63744(7) 0.33289(4) 0.054 Uani 1 1 d U B . 
O_128 O 0.62949(5) 0.65510(6) 0.32375(4) 0.068 Uani 1 1 d U . . 
N_129 N 0.63280(6) 0.63251(7) 0.34373(4) 0.063 Uani 1 1 d DU . . 
H0_129 H 0.6256 0.6192 0.3494 0.076 Uiso 1 1 calc R B . 
CA_129 C 0.65792(7) 0.64843(9) 0.34666(5) 0.070 Uani 1 1 d DU B . 
HA_129 H 0.6623 0.6643 0.3421 0.084 Uiso 1 1 calc R . . 
CB_129 C 0.66278(10) 0.65064(17) 0.36555(6) 0.114 Uani 0.90 1 d PDU . . 
HB1_129 H 0.6799 0.6599 0.3676 0.137 Uiso 0.90 1 calc PR B . 
HB2_129 H 0.6568 0.6348 0.3705 0.137 Uiso 0.90 1 calc PR . . 
CG_129 C 0.65052(18) 0.6630(3) 0.37394(12) 0.193 Uani 0.90 1 d PDU B . 
HG1_129 H 0.6554 0.6780 0.3680 0.231 Uiso 0.90 1 calc PR . . 
HG2_129 H 0.6333 0.6530 0.3725 0.231 Uiso 0.90 1 calc PR . . 
CD_129 C 0.6558(2) 0.6682(4) 0.39254(13) 0.290 Uani 0.90 1 d PDU . . 
HD1_129 H 0.6729 0.6759 0.3947 0.348 Uiso 0.90 1 calc PR B . 
HD2_129 H 0.6476 0.6536 0.3993 0.348 Uiso 0.90 1 calc PR . . 
NE_129 N 0.6464(3) 0.6846(4) 0.39660(14) 0.377 Uani 0.90 1 d PDU B . 
HE_129 H 0.6564 0.6999 0.3964 0.452 Uiso 0.90 1 calc PR . . 
CZ_129 C 0.6250(3) 0.6780(4) 0.40031(14) 0.372 Uani 0.90 1 d PDU . . 
NH1_129 N 0.6101(3) 0.6547(4) 0.40261(12) 0.337 Uani 0.90 1 d PDU B . 
HH1A_129 H 0.6152 0.6447 0.4015 0.404 Uiso 0.90 1 calc PR . . 
HH1B_129 H 0.5953 0.6496 0.4052 0.404 Uiso 0.90 1 calc PR . . 
NH2_129 N 0.6170(4) 0.6924(4) 0.40303(18) 0.430 Uani 0.90 1 d PDU B . 
HH2A_129 H 0.6265 0.7077 0.4023 0.516 Uiso 0.90 1 calc PR . . 
HH2B_129 H 0.6021 0.6867 0.4055 0.516 Uiso 0.90 1 calc PR . . 
C_129 C 0.67226(7) 0.63957(8) 0.33785(5) 0.058 Uani 1 1 d DU . . 
O_129 O 0.66380(6) 0.61951(6) 0.33253(4) 0.075 Uani 1 1 d DU B . 
N_130 N 0.69550(6) 0.65539(7) 0.33616(4) 0.059 Uani 1 1 d DU B . 
H0_130 H 0.7008 0.6704 0.3381 0.070 Uiso 1 1 calc R . . 
CA_130 C 0.71161(7) 0.64742(8) 0.33104(4) 0.057 Uani 1 1 d U . . 
HA1_130 H 0.7072 0.6326 0.3370 0.068 Uiso 1 1 calc R B . 
HA2_130 H 0.7277 0.6592 0.3347 0.068 Uiso 1 1 calc R . . 
C_130 C 0.71221(7) 0.64329(7) 0.31218(4) 0.051 Uani 1 1 d U B . 
O_130 O 0.72194(5) 0.63228(5) 0.30732(3) 0.055 Uani 1 1 d U . . 
N_131 N 0.70224(5) 0.65133(6) 0.30175(3) 0.049 Uani 1 1 d U . . 
H0_131 H 0.6965 0.6599 0.3057 0.059 Uiso 1 1 calc R B . 
CA_131 C 0.70061(6) 0.64622(7) 0.28391(4) 0.047 Uani 1 1 d U B . 
HA_131 H 0.6972 0.6297 0.2824 0.056 Uiso 1 1 calc R . . 
CB_131 C 0.68037(6) 0.64853(7) 0.27618(4) 0.050 Uani 1 1 d U . . 
HB1_131 H 0.6837 0.6648 0.2779 0.059 Uiso 1 1 calc R B . 
HB2_131 H 0.6800 0.6459 0.2639 0.059 Uiso 1 1 calc R . . 
CG_131 C 0.65608(6) 0.63157(7) 0.28344(4) 0.050 Uani 1 1 d U B . 
HG_131 H 0.6572 0.6333 0.2960 0.060 Uiso 1 1 calc R . . 
CD1_131 C 0.63827(8) 0.63827(11) 0.27751(6) 0.076 Uani 1 1 d U . . 
HD1A_131 H 0.6228 0.6274 0.2824 0.114 Uiso 1 1 calc R B . 
HD1B_131 H 0.6372 0.6374 0.2652 0.114 Uiso 1 1 calc R . . 
HD1C_131 H 0.6432 0.6543 0.2811 0.114 Uiso 1 1 calc R . . 
CD2_131 C 0.64826(8) 0.60595(8) 0.27933(7) 0.077 Uani 1 1 d U . . 
HD2A_131 H 0.6599 0.6021 0.2837 0.116 Uiso 1 1 calc R B . 
HD2B_131 H 0.6470 0.6037 0.2671 0.116 Uiso 1 1 calc R . . 
HD2C_131 H 0.6329 0.5957 0.2845 0.116 Uiso 1 1 calc R . . 
C_131 C 0.72371(6) 0.66276(6) 0.27500(4) 0.047 Uani 1 1 d U . . 
O_131 O 0.73662(5) 0.68284(5) 0.27976(4) 0.064 Uani 1 1 d U B . 
N_132 N 0.72832(5) 0.65370(5) 0.26137(3) 0.044 Uani 1 1 d U B . 
H0_132 H 0.7192 0.6387 0.2589 0.052 Uiso 1 1 calc R . . 
CA_132 C 0.74817(6) 0.66829(6) 0.25071(4) 0.044 Uani 1 1 d U . . 
HA_132 H 0.7597 0.6822 0.2574 0.053 Uiso 1 1 calc R B . 
CB_132 C 0.76039(6) 0.65489(6) 0.24470(4) 0.045 Uani 1 1 d U B . 
HB_132 H 0.7488 0.6400 0.2389 0.054 Uiso 1 1 calc R . . 
OG1_132 O 0.76881(5) 0.64943(5) 0.25968(3) 0.052 Uani 1 1 d U . . 
HG1_132 H 0.7791 0.6459 0.2571 0.078 Uiso 1 1 calc R B . 
CG2_132 C 0.78052(6) 0.66965(7) 0.23291(5) 0.052 Uani 1 1 d U . . 
HG2A_132 H 0.7898 0.6619 0.2310 0.078 Uiso 1 1 calc R B . 
HG2B_132 H 0.7906 0.6852 0.2379 0.078 Uiso 1 1 calc R . . 
HG2C_132 H 0.7743 0.6714 0.2221 0.078 Uiso 1 1 calc R . . 
C_132 C 0.73980(6) 0.67710(6) 0.23587(4) 0.046 Uani 1 1 d U B . 
O_132 O 0.72093(4) 0.66376(4) 0.22855(3) 0.055 Uani 1 1 d U . . 
N_133 N 0.75353(5) 0.69946(5) 0.23155(4) 0.054 Uani 1 1 d DU . . 
H0_133 H 0.7668 0.7080 0.2371 0.065 Uiso 1 1 calc R B 1 
CA_133 C 0.7475(2) 0.7102(2) 0.21812(14) 0.054 Uani 0.60 1 d PDU B 1 
HA_133 H 0.7305 0.7001 0.2152 0.065 Uiso 0.60 1 calc PR B 1 
CA_133 C 0.7479(3) 0.7111(3) 0.21832(19) 0.057 Uani 0.40 1 d PDU B 2 
HA1_133 H 0.7309 0.7012 0.2154 0.068 Uiso 0.40 1 calc PR B 2 
CB_133 C 0.7520(3) 0.7341(2) 0.2244(2) 0.062 Uani 0.60 1 d PDU B 1 
HB1_133 H 0.7687 0.7437 0.2278 0.074 Uiso 0.60 1 calc PR B 1 
HB2_133 H 0.7423 0.7317 0.2345 0.074 Uiso 0.60 1 calc PR B 1 
CB_133 C 0.7524(6) 0.7351(4) 0.2241(3) 0.071 Uani 0.40 1 d PDU B 2 
HB3_133 H 0.7453 0.7333 0.2353 0.085 Uiso 0.40 1 calc PR B 2 
HB4_133 H 0.7696 0.7456 0.2253 0.085 Uiso 0.40 1 calc PR B 2 
CG_133 C 0.74651(18) 0.74791(17) 0.21135(15) 0.064 Uani 0.60 1 d PDU B 1 
HG1_133 H 0.7555 0.7498 0.2009 0.077 Uiso 0.60 1 calc PR B 1 
HG2_133 H 0.7295 0.7393 0.2086 0.077 Uiso 0.60 1 calc PR B 1 
CG_133 C 0.7431(4) 0.7467(3) 0.2126(3) 0.088 Uani 0.40 1 d PDU B 2 
HG3_133 H 0.7265 0.7352 0.2099 0.106 Uiso 0.40 1 calc PR B 2 
HG4_133 H 0.7520 0.7507 0.2019 0.106 Uiso 0.40 1 calc PR B 2 
CD_133 C 0.75332(17) 0.77194(16) 0.21864(13) 0.088 Uani 0.60 1 d PDU B 1 
CD_133 C 0.7443(3) 0.7688(2) 0.21942(19) 0.102 Uani 0.40 1 d PDU B 2 
OE1_133 O 0.77436(15) 0.78690(12) 0.21913(11) 0.118 Uani 0.60 1 d PDU B 1 
OE1_133 O 0.7498(3) 0.7857(2) 0.2101(2) 0.153 Uani 0.40 1 d PDU B 2 
NE2_133 N 0.73561(17) 0.77425(17) 0.22384(11) 0.099 Uani 0.60 1 d PDU B 1 
HE2A_133 H 0.7382 0.7876 0.2282 0.119 Uiso 0.60 1 calc PR B 1 
HE2B_133 H 0.7211 0.7624 0.2229 0.119 Uiso 0.60 1 calc PR B 1 
NE2_133 N 0.7391(3) 0.7685(2) 0.23531(18) 0.108 Uani 0.40 1 d PDU B 2 
HE2C_133 H 0.7395 0.7809 0.2399 0.130 Uiso 0.40 1 calc PR B 2 
HE2D_133 H 0.7353 0.7560 0.2414 0.130 Uiso 0.40 1 calc PR B 2 
C_133 C 0.76263(6) 0.71381(7) 0.20269(5) 0.056 Uani 1 1 d DU . . 
O_133 O 0.78435(5) 0.72260(6) 0.20395(4) 0.068 Uani 1 1 d DU B . 
N_134 N 0.75107(6) 0.70779(6) 0.18823(4) 0.061 Uani 1 1 d DU B . 
H0_134 H 0.7356 0.6999 0.1885 0.073 Uiso 1 1 calc R . . 
CA_134 C 0.76258(8) 0.71356(9) 0.17212(5) 0.067 Uani 1 1 d U . . 
HA1_134 H 0.7603 0.6990 0.1666 0.080 Uiso 1 1 calc R B . 
HA2_134 H 0.7797 0.7242 0.1737 0.080 Uiso 1 1 calc R . . 
C_134 C 0.75284(7) 0.72533(7) 0.16096(5) 0.059 Uani 1 1 d U B . 
O_134 O 0.73594(5) 0.72720(6) 0.16518(4) 0.069 Uani 1 1 d U . . 
N_135 N 0.76354(6) 0.73217(7) 0.14583(4) 0.062 Uani 1 1 d U . . 
H0_135 H 0.7750 0.7295 0.1432 0.075 Uiso 1 1 calc R B . 
CA_135 C 0.75594(8) 0.74395(8) 0.13398(6) 0.067 Uani 1 1 d U B . 
HA_135 H 0.7420 0.7439 0.1392 0.081 Uiso 1 1 calc R . . 
CB_135 C 0.77480(10) 0.76980(9) 0.13172(7) 0.078 Uani 1 1 d U . . 
HB1_135 H 0.7683 0.7777 0.1247 0.094 Uiso 1 1 calc R B . 
HB2_135 H 0.7788 0.7776 0.1429 0.094 Uiso 1 1 calc R . . 
CG_135 C 0.79677(9) 0.77288(9) 0.12363(7) 0.082 Uani 1 1 d U B . 
OD1_135 O 0.79703(6) 0.75626(7) 0.11700(5) 0.081 Uani 1 1 d U . . 
ND2_135 N 0.81550(11) 0.79451(9) 0.12441(10) 0.126 Uani 1 1 d U . . 
HD2A_135 H 0.8290 0.7974 0.1200 0.152 Uiso 1 1 calc R B . 
HD2B_135 H 0.8144 0.8059 0.1294 0.152 Uiso 1 1 calc R . . 
C_135 C 0.74774(8) 0.73122(8) 0.11734(6) 0.064 Uani 1 1 d U . . 
O_135 O 0.74388(6) 0.74056(6) 0.10526(4) 0.074 Uani 1 1 d U B . 
N_136 N 0.74310(7) 0.70868(7) 0.11666(5) 0.067 Uani 1 1 d U B . 
H0_136 H 0.7495 0.7036 0.1241 0.080 Uiso 1 1 calc R . . 
CA_136 C 0.72784(8) 0.69297(8) 0.10385(5) 0.066 Uani 1 1 d U . . 
HA_136 H 0.7343 0.6994 0.0924 0.080 Uiso 1 1 calc R B . 
CB_136 C 0.72593(9) 0.66885(9) 0.10605(6) 0.070 Uani 1 1 d U B . 
HB1_136 H 0.7417 0.6709 0.1070 0.104 Uiso 1 1 calc R . . 
HB2_136 H 0.7179 0.6589 0.0963 0.104 Uiso 1 1 calc R . . 
HB3_136 H 0.7170 0.6613 0.1163 0.104 Uiso 1 1 calc R . . 
C_136 C 0.70321(8) 0.69010(8) 0.10588(5) 0.062 Uani 1 1 d U B . 
O_136 O 0.69531(6) 0.68877(7) 0.12000(4) 0.079 Uani 1 1 d U . . 
N_137 N 0.69173(6) 0.68893(6) 0.09184(4) 0.057 Uani 1 1 d DU . . 
H0_137 H 0.6983 0.6903 0.0819 0.069 Uiso 1 1 calc R B 1 
C_137 C 0.65001(7) 0.65976(6) 0.09611(4) 0.048 Uani 1 1 d DU . . 
O_137 O 0.65473(5) 0.64393(4) 0.09445(3) 0.055 Uani 1 1 d DU B . 
CA_137 C 0.66824(11) 0.68545(11) 0.09316(9) 0.059 Uani 0.80 1 d PDU B 1 
HA_137 H 0.6681 0.6942 0.1034 0.071 Uiso 0.80 1 calc PR B 1 
CA_137 C 0.6680(3) 0.6853(3) 0.0923(2) 0.050 Uani 0.20 1 d PDU B 2 
HA1_137 H 0.6674 0.6951 0.1018 0.060 Uiso 0.20 1 calc PR B 2 
CB_137 C 0.66228(16) 0.69621(12) 0.07856(8) 0.066 Uani 0.80 1 d PDU B 1 
HB1_137 H 0.6759 0.7120 0.0764 0.079 Uiso 0.80 1 calc PR B 1 
HB2_137 H 0.6490 0.6984 0.0819 0.079 Uiso 0.80 1 calc PR B 1 
CB_137 C 0.6629(6) 0.6943(5) 0.0761(2) 0.065 Uani 0.20 1 d PDU B 2 
HB3_137 H 0.6744 0.7113 0.0750 0.078 Uiso 0.20 1 calc PR B 2 
HB4_137 H 0.6471 0.6927 0.0770 0.078 Uiso 0.20 1 calc PR B 2 
SG_137 S 0.65449(4) 0.67951(3) 0.05888(2) 0.086 Uani 0.80 1 d PDU B 1 
SG1_137 S 0.66378(13) 0.67958(13) 0.05701(7) 0.071 Uani 0.20 1 d PDU B 2 
N_138 N 0.62904(6) 0.65630(5) 0.10106(4) 0.051 Uani 1 1 d DU B . 
H0_138 H 0.6269 0.6685 0.1015 0.061 Uiso 1 1 calc R L 1 
CA_138 C 0.60966(10) 0.63345(10) 0.10572(9) 0.047 Uani 0.75 1 d PDU B 1 
HA_138 H 0.6085 0.6216 0.0973 0.057 Uiso 0.75 1 calc PR B 1 
CA_138 C 0.6095(3) 0.6334(3) 0.1056(3) 0.059 Uani 0.13 1 d PDU B 2 
HA1_138 H 0.6083 0.6216 0.0971 0.071 Uiso 0.13 1 calc PR B 2 
CA_138 C 0.6097(3) 0.6341(3) 0.1067(3) 0.043 Uani 0.12 1 d PDU B 3 
HA2_138 H 0.6089 0.6210 0.0998 0.051 Uiso 0.12 1 calc PR B 3 
CB_138 C 0.6131(2) 0.62582(16) 0.12327(9) 0.060 Uani 0.75 1 d PDU B 1 
HB1_138 H 0.5997 0.6099 0.1256 0.072 Uiso 0.75 1 calc PR B 1 
HB2_138 H 0.6276 0.6248 0.1232 0.072 Uiso 0.75 1 calc PR B 1 
CB_138 C 0.6129(8) 0.6257(6) 0.1231(4) 0.053 Uani 0.13 1 d PDU B 2 
HB3_138 H 0.6232 0.6188 0.1221 0.064 Uiso 0.13 1 calc PR B 2 
HB4_138 H 0.5975 0.6134 0.1274 0.064 Uiso 0.13 1 calc PR B 2 
CB_138 C 0.6130(7) 0.6302(5) 0.1254(3) 0.054 Uani 0.12 1 d PDU B 3 
HB5_138 H 0.5987 0.6160 0.1297 0.065 Uiso 0.12 1 calc PR B 3 
HB6_138 H 0.6265 0.6277 0.1268 0.065 Uiso 0.12 1 calc PR B 3 
CG_138 C 0.61477(16) 0.64225(15) 0.13748(9) 0.089 Uani 0.75 1 d PDU B 1 
HG1_138 H 0.6244 0.6586 0.1335 0.106 Uiso 0.75 1 calc PR B 1 
HG2_138 H 0.6233 0.6402 0.1470 0.106 Uiso 0.75 1 calc PR B 1 
CG_138 C 0.6238(4) 0.6459(6) 0.1358(4) 0.065 Uani 0.13 1 d PDU B 2 
HG3_138 H 0.6371 0.6598 0.1305 0.078 Uiso 0.13 1 calc PR B 2 
HG4_138 H 0.6301 0.6412 0.1455 0.078 Uiso 0.13 1 calc PR B 2 
CG_138 C 0.6171(7) 0.6517(5) 0.1354(2) 0.083 Uani 0.12 1 d PDU B 3 
HG5_138 H 0.6059 0.6564 0.1314 0.099 Uiso 0.12 1 calc PR B 3 
HG6_138 H 0.6331 0.6646 0.1327 0.099 Uiso 0.12 1 calc PR B 3 
SD_138 S 0.58757(9) 0.63854(11) 0.14534(3) 0.189 Uani 0.75 1 d PDU B 1 
SD_138 S 0.60254(14) 0.65394(9) 0.14361(8) 0.049 Uani 0.13 1 d PDU B 2 
SD_138 S 0.61457(17) 0.64895(17) 0.15782(10) 0.063 Uani 0.12 1 d PDU B 3 
CE_138 C 0.5753(3) 0.6136(3) 0.15722(14) 0.246 Uani 0.75 1 d PDU B 1 
HE1_138 H 0.5603 0.6108 0.1618 0.369 Uiso 0.75 1 calc PR B 1 
HE2_138 H 0.5859 0.6154 0.1665 0.369 Uiso 0.75 1 calc PR B 1 
HE3_138 H 0.5727 0.6002 0.1502 0.369 Uiso 0.75 1 calc PR B 1 
CE_138 C 0.5800(3) 0.6291(3) 0.1431(2) 0.049 Uani 0.13 1 d PDU B 2 
HE4_138 H 0.5664 0.6304 0.1467 0.073 Uiso 0.13 1 calc PR B 2 
HE5_138 H 0.5819 0.6185 0.1507 0.073 Uiso 0.13 1 calc PR B 2 
HE6_138 H 0.5774 0.6229 0.1316 0.073 Uiso 0.13 1 calc PR B 2 
CE_138 C 0.5928(7) 0.6564(9) 0.1598(4) 0.084 Uani 0.12 1 d PDU B 3 
HE7_138 H 0.5891 0.6566 0.1717 0.126 Uiso 0.12 1 calc PR B 3 
HE8_138 H 0.5786 0.6447 0.1539 0.126 Uiso 0.12 1 calc PR B 3 
HE9_138 H 0.5982 0.6720 0.1549 0.126 Uiso 0.12 1 calc PR B 3 
C_138 C 0.58712(6) 0.63485(6) 0.10489(4) 0.048 Uani 1 1 d DU . . 
O_138 O 0.58748(5) 0.65363(4) 0.10349(3) 0.057 Uani 1 1 d DU B . 
N_139 N 0.56735(6) 0.61424(6) 0.10610(4) 0.055 Uani 1 1 d DU B . 
H0_139 H 0.5681 0.6013 0.1066 0.066 Uiso 1 1 calc R . . 
CA_139 C 0.54449(7) 0.61272(7) 0.10661(6) 0.063 Uani 1 1 d U . . 
HA1_139 H 0.5385 0.6114 0.0950 0.076 Uiso 1 1 calc R B . 
HA2_139 H 0.5462 0.6273 0.1116 0.076 Uiso 1 1 calc R . . 
C_139 C 0.52705(7) 0.59203(7) 0.11669(5) 0.058 Uani 1 1 d U B . 
O_139 O 0.53093(5) 0.57643(5) 0.12166(4) 0.065 Uani 1 1 d U . . 
N_140 N 0.5072(5) 0.5911(6) 0.1193(7) 0.063 Uani 0.40 1 d PDU B 1 
H0_140 H 0.5046 0.6020 0.1151 0.076 Uiso 0.40 1 calc PR B 1 
N_140 N 0.5065(8) 0.5909(7) 0.1192(7) 0.055 Uani 0.13 1 d PDU B 2 
H0A_140 H 0.5050 0.6027 0.1155 0.066 Uiso 0.13 1 calc PR B 2 
N_140 N 0.5067(6) 0.5912(7) 0.1191(7) 0.058 Uani 0.28 1 d PDU B 3 
H0B_140 H 0.5048 0.6026 0.1150 0.070 Uiso 0.28 1 calc PR B 3 
N_140 N 0.5071(5) 0.5927(4) 0.1229(3) 0.064 Uani 0.19 1 d PDU B 4 
H0C_140 H 0.5050 0.6046 0.1203 0.077 Uiso 0.19 1 calc PR B 4 
C_140 C 0.4815(3) 0.5488(4) 0.1206(3) 0.053 Uani 0.40 1 d PDU B 1 
C_140 C 0.4812(5) 0.5481(6) 0.1205(5) 0.045 Uani 0.13 1 d PDU B 2 
C_140 C 0.4824(4) 0.5489(5) 0.1205(3) 0.061 Uani 0.28 1 d PDU B 3 
C_140 C 0.4808(3) 0.5513(4) 0.1232(2) 0.047 Uani 0.19 1 d PDU B 4 
O_140 O 0.4768(4) 0.5463(4) 0.1055(2) 0.061 Uani 0.40 1 d PDU B 1 
O_140 O 0.4780(8) 0.5450(9) 0.1052(5) 0.046 Uani 0.13 1 d PDU B 2 
O_140 O 0.4809(3) 0.5456(4) 0.1052(2) 0.077 Uani 0.28 1 d PDU B 3 
O_140 O 0.4749(4) 0.5492(4) 0.1083(2) 0.047 Uani 0.19 1 d PDU B 4 
CA_140 C 0.4893(3) 0.5722(3) 0.1292(2) 0.058 Uani 0.40 1 d PDU B 1 
HA_140 H 0.4959 0.5721 0.1406 0.069 Uiso 0.40 1 calc PR B 1 
CA_140 C 0.4865(7) 0.5719(7) 0.1277(4) 0.049 Uani 0.13 1 d PDU B 2 
HA1_140 H 0.4902 0.5724 0.1399 0.059 Uiso 0.13 1 calc PR B 2 
CA_140 C 0.4870(5) 0.5720(5) 0.1282(3) 0.071 Uani 0.28 1 d PDU B 3 
HA2_140 H 0.4918 0.5725 0.1402 0.085 Uiso 0.28 1 calc PR B 3 
CA_140 C 0.4900(4) 0.5736(3) 0.1334(2) 0.059 Uani 0.19 1 d PDU B 4 
HA3_140 H 0.4985 0.5723 0.1434 0.071 Uiso 0.19 1 calc PR B 4 
CB_140 C 0.4680(3) 0.5757(2) 0.13145(16) 0.060 Uani 0.40 1 d PDU B 1 
HB1_140 H 0.4611 0.5752 0.1203 0.072 Uiso 0.40 1 calc PR B 1 
HB2_140 H 0.4559 0.5626 0.1383 0.072 Uiso 0.40 1 calc PR B 1 
CB_140 C 0.4643(7) 0.5737(7) 0.1258(5) 0.070 Uani 0.13 1 d PDU B 2 
HB3_140 H 0.4617 0.5749 0.1136 0.084 Uiso 0.13 1 calc PR B 2 
HB4_140 H 0.4508 0.5588 0.1299 0.084 Uiso 0.13 1 calc PR B 2 
CB_140 C 0.4651(5) 0.5746(5) 0.1278(4) 0.091 Uani 0.28 1 d PDU B 3 
HB5_140 H 0.4589 0.5714 0.1162 0.109 Uiso 0.28 1 calc PR B 3 
HB6_140 H 0.4531 0.5621 0.1351 0.109 Uiso 0.28 1 calc PR B 3 
CB_140 C 0.4705(4) 0.5783(4) 0.1398(4) 0.078 Uani 0.19 1 d PDU B 4 
HB7_140 H 0.4593 0.5752 0.1305 0.093 Uiso 0.19 1 calc PR B 4 
HB8_140 H 0.4618 0.5670 0.1489 0.093 Uiso 0.19 1 calc PR B 4 
CG_140 C 0.4741(2) 0.5988(2) 0.13990(13) 0.054 Uani 0.40 1 d PDU B 1 
HG1_140 H 0.4835 0.6008 0.1502 0.065 Uiso 0.40 1 calc PR B 1 
HG2_140 H 0.4838 0.6120 0.1322 0.065 Uiso 0.40 1 calc PR B 1 
CG_140 C 0.4638(8) 0.5938(8) 0.1346(4) 0.080 Uani 0.13 1 d PDU B 2 
HG3_140 H 0.4486 0.5929 0.1323 0.096 Uiso 0.13 1 calc PR B 2 
HG4_140 H 0.4763 0.6088 0.1298 0.096 Uiso 0.13 1 calc PR B 2 
CG_140 C 0.4676(5) 0.5978(5) 0.1333(5) 0.129 Uani 0.28 1 d PDU B 3 
HG5_140 H 0.4802 0.6106 0.1265 0.155 Uiso 0.28 1 calc PR B 3 
HG6_140 H 0.4726 0.6006 0.1452 0.155 Uiso 0.28 1 calc PR B 3 
CG_140 C 0.4795(5) 0.6030(4) 0.1462(3) 0.078 Uani 0.19 1 d PDU B 4 
HG7_140 H 0.4842 0.6136 0.1363 0.093 Uiso 0.19 1 calc PR B 4 
HG8_140 H 0.4939 0.6076 0.1528 0.093 Uiso 0.19 1 calc PR B 4 
CD_140 C 0.45197(17) 0.59915(19) 0.14454(12) 0.058 Uani 0.40 1 d PDU B 1 
HD1_140 H 0.4444 0.6001 0.1340 0.069 Uiso 0.40 1 calc PR B 1 
HD2_140 H 0.4410 0.5839 0.1499 0.069 Uiso 0.40 1 calc PR B 1 
CD_140 C 0.4672(6) 0.5945(6) 0.1536(3) 0.080 Uani 0.13 1 d PDU B 2 
HD3_140 H 0.4586 0.5783 0.1582 0.096 Uiso 0.13 1 calc PR B 2 
HD4_140 H 0.4841 0.6012 0.1562 0.096 Uiso 0.13 1 calc PR B 2 
CD_140 C 0.4453(5) 0.5991(4) 0.1315(4) 0.162 Uani 0.28 1 d PDU B 3 
HD5_140 H 0.4384 0.5928 0.1203 0.194 Uiso 0.28 1 calc PR B 3 
HD6_140 H 0.4339 0.5886 0.1400 0.194 Uiso 0.28 1 calc PR B 3 
CD_140 C 0.4631(3) 0.6076(3) 0.15690(19) 0.055 Uani 0.19 1 d PDU B 4 
HD7_140 H 0.4691 0.6248 0.1572 0.066 Uiso 0.19 1 calc PR B 4 
HD8_140 H 0.4474 0.6000 0.1516 0.066 Uiso 0.19 1 calc PR B 4 
NE_140 N 0.45435(15) 0.61788(16) 0.15563(10) 0.063 Uani 0.40 1 d PDU B 1 
HE_140 H 0.4551 0.6304 0.1511 0.076 Uiso 0.40 1 calc PR B 1 
NE_140 N 0.4585(3) 0.6086(4) 0.1613(3) 0.067 Uani 0.13 1 d PDU B 2 
HE1_140 H 0.4449 0.6059 0.1573 0.080 Uiso 0.13 1 calc PR B 2 
NE_140 N 0.4474(5) 0.6214(4) 0.1331(3) 0.177 Uani 0.28 1 d PDU B 3 
HE2_140 H 0.4585 0.6292 0.1406 0.213 Uiso 0.28 1 calc PR B 3 
NE_140 N 0.4610(2) 0.5989(3) 0.17412(17) 0.066 Uani 0.19 1 d PDU B 4 
HE3_140 H 0.4654 0.5884 0.1760 0.080 Uiso 0.19 1 calc PR B 4 
CZ_140 C 0.45550(14) 0.6170(2) 0.17213(12) 0.069 Uani 0.40 1 d PDU B 1 
CZ_140 C 0.4671(6) 0.6246(5) 0.1731(4) 0.120 Uani 0.13 1 d PDU B 2 
CZ_140 C 0.4397(4) 0.6351(3) 0.1282(3) 0.151 Uani 0.28 1 d PDU B 3 
CZ_140 C 0.4531(3) 0.6054(3) 0.1868(2) 0.066 Uani 0.19 1 d PDU B 4 
NH1_140 N 0.4560(2) 0.6341(3) 0.18169(15) 0.110 Uani 0.40 1 d PDU B 1 
HH1A_140 H 0.4555 0.6460 0.1769 0.132 Uiso 0.40 1 calc PR B 1 
HH1B_140 H 0.4567 0.6335 0.1927 0.132 Uiso 0.40 1 calc PR B 1 
NH1_140 N 0.4549(7) 0.6347(7) 0.1779(3) 0.124 Uani 0.13 1 d PDU B 2 
HH1C_140 H 0.4412 0.6305 0.1732 0.149 Uiso 0.13 1 calc PR B 2 
HH1D_140 H 0.4604 0.6455 0.1858 0.149 Uiso 0.13 1 calc PR B 2 
NH1_140 N 0.4494(5) 0.6558(3) 0.1352(2) 0.151 Uani 0.28 1 d PDU B 3 
HH1E_140 H 0.4604 0.6597 0.1428 0.182 Uiso 0.28 1 calc PR B 3 
HH1F_140 H 0.4449 0.6659 0.1324 0.182 Uiso 0.28 1 calc PR B 3 
NH1_140 N 0.4462(3) 0.6209(4) 0.1857(3) 0.075 Uani 0.19 1 d PDU B 4 
HH1G_140 H 0.4467 0.6275 0.1760 0.090 Uiso 0.19 1 calc PR B 4 
HH1H_140 H 0.4410 0.6247 0.1947 0.090 Uiso 0.19 1 calc PR B 4 
NH2_140 N 0.4563(2) 0.5997(3) 0.17991(12) 0.101 Uani 0.40 1 d PDU B 1 
HH2A_140 H 0.4561 0.5883 0.1740 0.121 Uiso 0.40 1 calc PR B 1 
HH2B_140 H 0.4571 0.5997 0.1910 0.121 Uiso 0.40 1 calc PR B 1 
NH2_140 N 0.4877(8) 0.6297(13) 0.1795(8) 0.246 Uani 0.13 1 d PDU B 2 
HH2C_140 H 0.4950 0.6224 0.1759 0.296 Uiso 0.13 1 calc PR B 2 
HH2D_140 H 0.4941 0.6404 0.1875 0.296 Uiso 0.13 1 calc PR B 2 
NH2_140 N 0.4234(6) 0.6283(7) 0.1165(5) 0.283 Uani 0.28 1 d PDU B 3 
HH2E_140 H 0.4177 0.6142 0.1120 0.339 Uiso 0.28 1 calc PR B 3 
HH2F_140 H 0.4183 0.6377 0.1132 0.339 Uiso 0.28 1 calc PR B 3 
NH2_140 N 0.4523(4) 0.5962(3) 0.20185(18) 0.075 Uani 0.19 1 d PDU B 4 
HH2G_140 H 0.4570 0.5859 0.2031 0.090 Uiso 0.19 1 calc PR B 4 
HH2H_140 H 0.4470 0.6004 0.2106 0.090 Uiso 0.19 1 calc PR B 4 
N_141 N 0.47997(6) 0.53224(6) 0.13110(4) 0.056 Uani 1 1 d DU . . 
H0_141 H 0.4800(8) 0.5354(8) 0.1441(6) 0.068 Uiso 1 1 d . . . 
CA_141 C 0.47501(7) 0.50938(7) 0.12550(5) 0.054 Uani 1 1 d U B . 
HA1_141 H 0.4677 0.5063 0.1142 0.065 Uiso 1 1 calc R . . 
HA2_141 H 0.4635 0.4974 0.1333 0.065 Uiso 1 1 calc R . . 
C_141 C 0.49689(6) 0.50663(6) 0.12456(4) 0.046 Uani 1 1 d U . . 
O_141 O 0.49476(4) 0.48697(4) 0.12449(3) 0.050 Uani 1 1 d U B . 
N_142 N 0.51753(5) 0.52648(5) 0.12424(3) 0.044 Uani 1 1 d U B . 
H0_142 H 0.5179 0.5400 0.1235 0.052 Uiso 1 1 calc R . . 
CA_142 C 0.53959(6) 0.52617(6) 0.12507(4) 0.040 Uani 1 1 d U . . 
HA_142 H 0.5385 0.5138 0.1172 0.048 Uiso 1 1 calc R B . 
CB_142 C 0.56010(6) 0.54972(6) 0.11958(4) 0.040 Uani 1 1 d U B . 
HB1_142 H 0.5749 0.5504 0.1230 0.048 Uiso 1 1 calc R . . 
HB2_142 H 0.5592 0.5624 0.1257 0.048 Uiso 1 1 calc R . . 
CG_142 C 0.56118(6) 0.55477(6) 0.10056(4) 0.042 Uani 1 1 d U . . 
OD1_142 O 0.57174(5) 0.57598(4) 0.09652(3) 0.053 Uani 1 1 d U B . 
OD2_142 O 0.55242(4) 0.53783(4) 0.09036(3) 0.048 Uani 1 1 d U B . 
C_142 C 0.54416(5) 0.52025(5) 0.14296(4) 0.037 Uani 1 1 d U B . 
O_142 O 0.55977(4) 0.51518(4) 0.14515(2) 0.039 Uani 1 1 d U . . 
N_143 N 0.53160(5) 0.52147(5) 0.15541(3) 0.041 Uani 1 1 d U . . 
H0_143 H 0.5227(7) 0.5227(7) 0.1531(5) 0.049 Uiso 1 1 d . . . 
CA_143 C 0.53428(6) 0.51625(6) 0.17279(4) 0.040 Uani 1 1 d U B . 
HA_143 H 0.5499 0.5288 0.1770 0.048 Uiso 1 1 calc R . . 
CB_143 C 0.51509(8) 0.51543(8) 0.18403(5) 0.058 Uani 1 1 d U . . 
HB1_143 H 0.4995 0.5054 0.1787 0.070 Uiso 1 1 calc R B . 
HB2_143 H 0.5152 0.5084 0.1950 0.070 Uiso 1 1 calc R . . 
OG_143 O 0.51861(7) 0.53827(6) 0.18658(4) 0.071 Uani 1 1 d U B . 
HG_143 H 0.5057(12) 0.5365(12) 0.1795(8) 0.107 Uiso 1 1 d . . . 
C_143 C 0.53319(5) 0.49269(5) 0.17397(3) 0.036 Uani 1 1 d U . . 
O_143 O 0.51901(4) 0.47547(4) 0.16588(3) 0.042 Uani 1 1 d U B . 
N_144 N 0.54854(4) 0.49261(4) 0.18499(3) 0.034 Uani 1 1 d U B . 
H0_144 H 0.5574 0.5054 0.1908 0.041 Uiso 1 1 calc R . . 
CA_144 C 0.55099(6) 0.47203(6) 0.18761(4) 0.038 Uani 1 1 d U . . 
HA1_144 H 0.5354 0.4578 0.1861 0.045 Uiso 1 1 calc R B . 
HA2_144 H 0.5559 0.4721 0.1994 0.045 Uiso 1 1 calc R . . 
C_144 C 0.56842(5) 0.47038(5) 0.17603(3) 0.033 Uani 1 1 d U B . 
O_144 O 0.57629(4) 0.45746(4) 0.17964(2) 0.041 Uani 1 1 d U . . 
N_145 N 0.57429(4) 0.48360(4) 0.16204(3) 0.033 Uani 1 1 d U . . 
H0_145 H 0.5698 0.4941 0.1607 0.039 Uiso 1 1 calc R B . 
CA_145 C 0.58805(5) 0.48056(5) 0.14921(3) 0.033 Uani 1 1 d U B . 
HA1_145 H 0.5865 0.4875 0.1386 0.040 Uiso 1 1 calc R . . 
HA2_145 H 0.5817 0.4635 0.1473 0.040 Uiso 1 1 calc R . . 
C_145 C 0.61400(5) 0.49188(5) 0.15373(3) 0.030 Uani 1 1 d U . . 
O_145 O 0.62375(4) 0.50701(4) 0.16454(2) 0.037 Uani 1 1 d U B . 
N_146 N 0.62539(4) 0.48383(4) 0.14441(3) 0.032 Uani 1 1 d U B . 
H0_146 H 0.6178 0.4741 0.1361 0.038 Uiso 1 1 calc R . . 
CA_146 C 0.64952(5) 0.49023(5) 0.14736(3) 0.031 Uani 1 1 d U . . 
HA_146 H 0.6513 0.4849 0.1588 0.037 Uiso 1 1 calc R B . 
CB_146 C 0.65635(5) 0.47799(5) 0.13357(3) 0.035 Uani 1 1 d U B . 
HB1_146 H 0.6613 0.4879 0.1233 0.042 Uiso 1 1 calc R . . 
HB2_146 H 0.6699 0.4766 0.1376 0.042 Uiso 1 1 calc R . . 
OG_146 O 0.63791(4) 0.45558(4) 0.12942(2) 0.037 Uani 1 1 d U . . 
HG_146 H 0.6346 0.4467 0.1378 0.055 Uiso 1 1 calc R B . 
C_146 C 0.66668(5) 0.51655(5) 0.14525(3) 0.031 Uani 1 1 d U B . 
O_146 O 0.66526(4) 0.52696(4) 0.13293(2) 0.040 Uani 1 1 d U . . 
N_147 N 0.68395(4) 0.52600(4) 0.15653(3) 0.032 Uani 1 1 d U . . 
H0_147 H 0.6820 0.5186 0.1662 0.038 Uiso 1 1 calc R B . 
CA_147 C 0.70609(5) 0.54800(5) 0.15385(3) 0.032 Uani 1 1 d U B . 
HA_147 H 0.7055 0.5547 0.1427 0.039 Uiso 1 1 calc R . . 
CB_147 C 0.71132(5) 0.56635(5) 0.16756(3) 0.035 Uani 1 1 d U . . 
HB1_147 H 0.7084 0.5587 0.1787 0.042 Uiso 1 1 calc R B . 
HB2_147 H 0.7282 0.5785 0.1670 0.042 Uiso 1 1 calc R . . 
CG_147 C 0.69670(5) 0.57796(5) 0.16598(3) 0.036 Uani 1 1 d U B . 
CD2_147 C 0.70572(5) 0.60249(6) 0.16232(4) 0.038 Uani 1 1 d U . . 
CE2_147 C 0.68620(6) 0.60601(6) 0.16193(4) 0.039 Uani 1 1 d U B . 
CE3_147 C 0.72808(6) 0.62147(6) 0.15921(4) 0.046 Uani 1 1 d U B . 
HE3_147 H 0.7414 0.6194 0.1592 0.055 Uiso 1 1 calc R . . 
CD1_147 C 0.67283(5) 0.56791(6) 0.16724(4) 0.038 Uani 1 1 d U . . 
HD1_147 H 0.6622 0.5518 0.1694 0.045 Uiso 1 1 calc R B . 
NE1_147 N 0.66658(5) 0.58483(5) 0.16486(3) 0.040 Uani 1 1 d U B . 
HE1_147 H 0.6521 0.5823 0.1652 0.048 Uiso 1 1 calc R . . 
CZ2_147 C 0.68878(7) 0.62817(7) 0.15896(4) 0.050 Uani 1 1 d U . . 
HZ2_147 H 0.6755 0.6304 0.1589 0.060 Uiso 1 1 calc R B . 
CZ3_147 C 0.73058(7) 0.64335(7) 0.15612(5) 0.056 Uani 1 1 d U . . 
HZ3_147 H 0.7458 0.6564 0.1540 0.068 Uiso 1 1 calc R B . 
CH2_147 C 0.71108(7) 0.64668(7) 0.15606(5) 0.057 Uani 1 1 d U B . 
HH2_147 H 0.7133 0.6619 0.1540 0.068 Uiso 1 1 calc R . . 
C_147 C 0.72530(5) 0.54132(5) 0.15346(3) 0.034 Uani 1 1 d U . . 
O_147 O 0.72649(4) 0.52928(4) 0.16532(2) 0.038 Uani 1 1 d U B . 
N_148 N 0.73967(4) 0.54840(5) 0.14045(3) 0.037 Uani 1 1 d U B . 
H0_148 H 0.7391 0.5583 0.1333 0.045 Uiso 1 1 calc R . . 
CA_148 C 0.75660(5) 0.54036(6) 0.13749(4) 0.038 Uani 1 1 d U . . 
HA_148 H 0.7624 0.5381 0.1486 0.046 Uiso 1 1 calc R B . 
CB_148 C 0.74465(6) 0.51666(6) 0.12794(4) 0.043 Uani 1 1 d U B . 
HB_148 H 0.7304 0.5057 0.1346 0.052 Uiso 1 1 calc R . . 
CG2_148 C 0.73595(7) 0.51853(8) 0.11037(5) 0.057 Uani 1 1 d U . . 
HG2A_148 H 0.7263 0.5261 0.1113 0.085 Uiso 1 1 calc R B . 
HG2B_148 H 0.7265 0.5028 0.1056 0.085 Uiso 1 1 calc R . . 
HG2C_148 H 0.7495 0.5280 0.1031 0.085 Uiso 1 1 calc R . . 
CG1_148 C 0.76055(6) 0.50567(6) 0.12741(4) 0.047 Uani 1 1 d U . . 
HG1A_148 H 0.7734 0.5145 0.1193 0.056 Uiso 1 1 calc R B . 
HG1B_148 H 0.7677 0.5073 0.1386 0.056 Uiso 1 1 calc R . . 
CD1_148 C 0.74759(7) 0.47979(8) 0.12241(6) 0.064 Uani 1 1 d U B . 
HD1A_148 H 0.7588 0.4741 0.1216 0.096 Uiso 1 1 calc R . . 
HD1B_148 H 0.7399 0.4780 0.1115 0.096 Uiso 1 1 calc R . . 
HD1C_148 H 0.7357 0.4706 0.1310 0.096 Uiso 1 1 calc R . . 
C_148 C 0.77713(6) 0.55939(6) 0.12775(4) 0.040 Uani 1 1 d U B . 
O_148 O 0.77404(4) 0.57115(5) 0.11702(3) 0.050 Uani 1 1 d U . . 
N_149 N 0.79837(5) 0.56241(5) 0.13128(4) 0.048 Uani 1 1 d U . . 
H0_149 H 0.8003 0.5551 0.1399 0.058 Uiso 1 1 calc R B . 
CA_149 C 0.81805(7) 0.57773(8) 0.12083(5) 0.059 Uani 1 1 d U B . 
HA_149 H 0.8167 0.5918 0.1178 0.071 Uiso 1 1 calc R . . 
CB_149 C 0.84142(7) 0.58614(8) 0.13012(6) 0.063 Uani 1 1 d U . . 
HB_149 H 0.8545 0.5973 0.1226 0.076 Uiso 1 1 calc R B . 
OG1_149 O 0.84398(5) 0.56609(5) 0.13282(4) 0.060 Uani 1 1 d U B . 
HG1_149 H 0.8582 0.5705 0.1346 0.091 Uiso 1 1 calc R . . 
CG2_149 C 0.84263(8) 0.59895(9) 0.14641(6) 0.071 Uani 1 1 d U B . 
HG2A_149 H 0.8584 0.6056 0.1513 0.106 Uiso 1 1 calc R . . 
HG2B_149 H 0.8310 0.5878 0.1544 0.106 Uiso 1 1 calc R . . 
HG2C_149 H 0.8392 0.6116 0.1440 0.106 Uiso 1 1 calc R . . 
C_149 C 0.81762(8) 0.56495(11) 0.10449(5) 0.074 Uani 1 1 d U . . 
O_149 O 0.80713(5) 0.54354(7) 0.10342(3) 0.072 Uani 1 1 d U B . 
N_150 N 0.83046(10) 0.57887(12) 0.09175(6) 0.111 Uani 1 1 d DU B . 
H0_150 H 0.8379 0.5943 0.0927 0.133 Uiso 1 1 calc R M 1 
C_150 C 0.8424(2) 0.5523(3) 0.07869(11) 0.136 Uani 0.78 1 d PDU B 1 
C_150 C 0.8422(7) 0.5523(7) 0.0779(4) 0.133 Uani 0.22 1 d PDU B 2 
O_150 O 0.8365(2) 0.5343(3) 0.06980(9) 0.180 Uani 0.78 1 d PDU B 1 
O_150 O 0.8371(12) 0.5364(10) 0.0676(5) 0.232 Uani 0.22 1 d PDU B 2 
CA_150 C 0.8318(2) 0.5676(3) 0.07613(12) 0.151 Uani 0.78 1 d PDU B 1 
HA_150 H 0.8154 0.5576 0.0717 0.182 Uiso 0.78 1 calc PR B 1 
CA_150 C 0.8310(6) 0.5677(6) 0.0760(3) 0.135 Uani 0.22 1 d PDU B 2 
HA1_150 H 0.8145 0.5577 0.0719 0.161 Uiso 0.22 1 calc PR B 2 
CB_150 C 0.8458(4) 0.5882(4) 0.0634(2) 0.223 Uani 0.78 1 d PDU B 1 
HB1_150 H 0.8475 0.5816 0.0526 0.268 Uiso 0.78 1 calc PR B 1 
HB2_150 H 0.8366 0.5961 0.0611 0.268 Uiso 0.78 1 calc PR B 1 
CB_150 C 0.8449(9) 0.5871(10) 0.0629(5) 0.175 Uani 0.22 1 d PDU B 2 
HB3_150 H 0.8605 0.5984 0.0676 0.210 Uiso 0.22 1 calc PR B 2 
HB4_150 H 0.8474 0.5800 0.0527 0.210 Uiso 0.22 1 calc PR B 2 
OG_150 O 0.8684(3) 0.6052(4) 0.06911(15) 0.327 Uani 0.78 1 d PDU B 1 
OG_150 O 0.8328(4) 0.5990(5) 0.0586(2) 0.149 Uani 0.22 1 d PDU B 2 
N_151 N 0.85821(17) 0.5581(3) 0.09112(12) 0.102 Uani 0.78 1 d PDU B 1 
H0_151 H 0.8620 0.5709 0.0970 0.122 Uiso 0.78 1 calc PR B 1 
N_151 N 0.8570(8) 0.5571(11) 0.0907(5) 0.124 Uani 0.22 1 d PDU B 2 
H0A_151 H 0.8596 0.5691 0.0970 0.149 Uiso 0.22 1 calc PR B 2 
CA_151 C 0.86909(10) 0.54497(16) 0.09534(8) 0.115 Uani 1 1 d DU . . 
HA_151 H 0.8733 0.5400 0.0846 0.138 Uiso 1 1 calc R B 1 
CB_151 C 0.89172(12) 0.56060(19) 0.10472(11) 0.134 Uani 1 1 d U B . 
HB1_151 H 0.9028 0.5731 0.0972 0.201 Uiso 1 1 calc R . . 
HB2_151 H 0.8986 0.5512 0.1086 0.201 Uiso 1 1 calc R . . 
HB3_151 H 0.8884 0.5676 0.1145 0.201 Uiso 1 1 calc R . . 
C_151 C 0.85239(10) 0.52210(13) 0.10552(7) 0.092 Uani 1 1 d U B . 
O_151 O 0.85959(9) 0.50930(11) 0.11045(11) 0.161 Uani 1 1 d U . . 
N_152 N 0.83078(7) 0.51766(8) 0.10840(4) 0.068 Uani 1 1 d U . . 
H0_152 H 0.8270 0.5284 0.1060 0.081 Uiso 1 1 calc R B . 
CA_152 C 0.81357(9) 0.49590(9) 0.11528(5) 0.069 Uani 1 1 d U B . 
HA1_152 H 0.8173 0.4837 0.1117 0.082 Uiso 1 1 calc R . . 
HA2_152 H 0.7982 0.4918 0.1103 0.082 Uiso 1 1 calc R . . 
C_152 C 0.81103(6) 0.49472(7) 0.13428(4) 0.051 Uani 1 1 d U . . 
O_152 O 0.79962(5) 0.47531(5) 0.14116(3) 0.061 Uani 1 1 d U B . 
N_153 N 0.82112(5) 0.51493(6) 0.14273(3) 0.044 Uani 1 1 d U B . 
H0_153 H 0.8289 0.5284 0.1373 0.053 Uiso 1 1 calc R . . 
CA_153 C 0.81904(6) 0.51449(6) 0.16119(4) 0.041 Uani 1 1 d U . . 
HA_153 H 0.8165 0.4990 0.1654 0.049 Uiso 1 1 calc R B . 
CB_153 C 0.84119(6) 0.53406(7) 0.16949(4) 0.046 Uani 1 1 d U B . 
HB1_153 H 0.8390 0.5333 0.1818 0.055 Uiso 1 1 calc R . . 
HB2_153 H 0.8438 0.5495 0.1656 0.055 Uiso 1 1 calc R . . 
CG_153 C 0.86284(6) 0.53204(7) 0.16527(4) 0.050 Uani 1 1 d U . . 
HG1_153 H 0.8653 0.5335 0.1529 0.060 Uiso 1 1 calc R B . 
HG2_153 H 0.8768 0.5453 0.1706 0.060 Uiso 1 1 calc R . . 
CD_153 C 0.86096(6) 0.50945(8) 0.17092(5) 0.053 Uani 1 1 d U B . 
OE1_153 O 0.85244(5) 0.50070(5) 0.18488(3) 0.060 Uani 1 1 d U . . 
NE2_153 N 0.86952(7) 0.49972(8) 0.16070(5) 0.073 Uani 1 1 d U . . 
HE2A_153 H 0.8693 0.4867 0.1637 0.088 Uiso 1 1 calc R B . 
HE2B_153 H 0.8754 0.5062 0.1509 0.088 Uiso 1 1 calc R . . 
C_153 C 0.79741(5) 0.51646(6) 0.16561(4) 0.039 Uani 1 1 d U B . 
O_153 O 0.79649(4) 0.53446(4) 0.16228(3) 0.042 Uani 1 1 d U . . 
N_154 N 0.78018(5) 0.49775(5) 0.17290(3) 0.039 Uani 1 1 d U . . 
H0_154 H 0.7821 0.4857 0.1749 0.046 Uiso 1 1 calc R B . 
CA_154 C 0.75779(5) 0.49613(6) 0.17785(3) 0.037 Uani 1 1 d U B . 
HA_154 H 0.7514 0.5009 0.1682 0.044 Uiso 1 1 calc R . . 
CB_154 C 0.74073(6) 0.47073(6) 0.18238(4) 0.042 Uani 1 1 d U . . 
HB1_154 H 0.7383 0.4607 0.1726 0.064 Uiso 1 1 calc R B . 
HB2_154 H 0.7257 0.4692 0.1858 0.064 Uiso 1 1 calc R . . 
HB3_154 H 0.7472 0.4659 0.1917 0.064 Uiso 1 1 calc R . . 
C_154 C 0.76223(5) 0.51253(6) 0.19275(3) 0.036 Uani 1 1 d U . . 
O_154 O 0.77197(4) 0.51111(5) 0.20557(3) 0.047 Uani 1 1 d U B . 
N_155 N 0.75465(4) 0.52794(5) 0.19076(3) 0.036 Uani 1 1 d U B . 
H0_155 H 0.7467 0.5270 0.1816 0.043 Uiso 1 1 calc R . . 
CA_155 C 0.75905(5) 0.54599(6) 0.20294(4) 0.037 Uani 1 1 d U . . 
HA_155 H 0.7725 0.5482 0.2102 0.044 Uiso 1 1 calc R B . 
CB_155 C 0.76613(5) 0.56956(6) 0.19444(4) 0.039 Uani 1 1 d U B . 
HB1_155 H 0.7688 0.5813 0.2032 0.047 Uiso 1 1 calc R . . 
HB2_155 H 0.7530 0.5677 0.1872 0.047 Uiso 1 1 calc R . . 
CG_155 C 0.78847(6) 0.57878(6) 0.18363(4) 0.045 Uani 1 1 d U . . 
HG1_155 H 0.7856 0.5677 0.1743 0.054 Uiso 1 1 calc R B . 
HG2_155 H 0.7925 0.5942 0.1787 0.054 Uiso 1 1 calc R . . 
CD_155 C 0.80864(6) 0.58129(6) 0.19434(4) 0.043 Uani 1 1 d U B . 
OE1_155 O 0.81532(4) 0.59440(5) 0.20676(3) 0.053 Uani 1 1 d U . . 
NE2_155 N 0.81790(5) 0.56825(6) 0.19010(4) 0.052 Uani 1 1 d U . . 
HE2A_155 H 0.8293 0.5687 0.1962 0.062 Uiso 1 1 calc R B . 
HE2B_155 H 0.8127 0.5591 0.1812 0.062 Uiso 1 1 calc R . . 
C_155 C 0.73845(5) 0.54036(5) 0.21445(3) 0.034 Uani 1 1 d U B . 
O_155 O 0.74203(4) 0.54718(4) 0.22930(2) 0.040 Uani 1 1 d U . . 
N_156 N 0.71682(4) 0.52903(5) 0.20785(3) 0.035 Uani 1 1 d U . . 
H0_156 H 0.7146 0.5231 0.1976 0.042 Uiso 1 1 calc R B . 
CA_156 C 0.69707(5) 0.52653(6) 0.21757(4) 0.038 Uani 1 1 d U B . 
HA1_156 H 0.7013 0.5417 0.2229 0.045 Uiso 1 1 calc R . . 
HA2_156 H 0.6933 0.5148 0.2266 0.045 Uiso 1 1 calc R . . 
C_156 C 0.67573(5) 0.51880(5) 0.20643(3) 0.032 Uani 1 1 d U . . 
O_156 O 0.67552(4) 0.51233(4) 0.19183(2) 0.037 Uani 1 1 d U B . 
N_157 N 0.65769(4) 0.51926(5) 0.21390(3) 0.033 Uani 1 1 d U B . 
H0_157 H 0.6595 0.5248 0.2242 0.040 Uiso 1 1 calc R . . 
CA_157 C 0.63516(5) 0.51077(5) 0.20545(3) 0.034 Uani 1 1 d U . . 
HA_157 H 0.6372 0.5076 0.1934 0.040 Uiso 1 1 calc R B . 
CB_157 C 0.61526(6) 0.48794(6) 0.21294(4) 0.041 Uani 1 1 d U B . 
HB_157 H 0.6008 0.4834 0.2062 0.049 Uiso 1 1 calc R . . 
CG1_157 C 0.62137(7) 0.46847(7) 0.21101(5) 0.056 Uani 1 1 d U . . 
HG1A_157 H 0.6264 0.4683 0.1994 0.084 Uiso 1 1 calc R B . 
HG1B_157 H 0.6075 0.4533 0.2136 0.084 Uiso 1 1 calc R . . 
HG1C_157 H 0.6342 0.4713 0.2188 0.084 Uiso 1 1 calc R . . 
CG2_157 C 0.60980(6) 0.49053(7) 0.23125(4) 0.051 Uani 1 1 d U . . 
HG2A_157 H 0.5970 0.4754 0.2353 0.077 Uiso 1 1 calc R B . 
HG2B_157 H 0.6050 0.5024 0.2320 0.077 Uiso 1 1 calc R . . 
HG2C_157 H 0.6239 0.4954 0.2381 0.077 Uiso 1 1 calc R . . 
C_157 C 0.62903(5) 0.53044(5) 0.20572(3) 0.033 Uani 1 1 d U B . 
O_157 O 0.63294(4) 0.54338(4) 0.21788(2) 0.039 Uani 1 1 d U . . 
N_158 N 0.61865(4) 0.53235(4) 0.19182(3) 0.033 Uani 1 1 d DU . . 
H0_158 H 0.6149 0.5219 0.1837 0.040 Uiso 1 1 calc R B 1 
CA_158 C 0.6133(2) 0.55114(19) 0.18970(14) 0.032 Uani 0.67 1 d PDU B 1 
HA_158 H 0.6281 0.5667 0.1903 0.039 Uiso 0.67 1 calc PR B 1 
CA_158 C 0.6130(4) 0.5510(3) 0.1896(3) 0.035 Uani 0.33 1 d PDU B 2 
HA1_158 H 0.6278 0.5666 0.1902 0.041 Uiso 0.33 1 calc PR B 2 
CB_158 C 0.6020(4) 0.5476(3) 0.17209(16) 0.034 Uani 0.67 1 d PDU B 1 
HB1_158 H 0.6130 0.5474 0.1637 0.041 Uiso 0.67 1 calc PR B 1 
HB2_158 H 0.5876 0.5319 0.1718 0.041 Uiso 0.67 1 calc PR B 1 
CB_158 C 0.6022(9) 0.5478(6) 0.1721(3) 0.037 Uani 0.33 1 d PDU B 2 
HB3_158 H 0.6135 0.5480 0.1638 0.045 Uiso 0.33 1 calc PR B 2 
HB4_158 H 0.5879 0.5321 0.1716 0.045 Uiso 0.33 1 calc PR B 2 
CG_158 C 0.5953(2) 0.5657(2) 0.1666(3) 0.038 Uani 0.67 1 d PDU B 1 
HG1_158 H 0.5891 0.5701 0.1764 0.045 Uiso 0.67 1 calc PR B 1 
HG2_158 H 0.5826 0.5585 0.1581 0.045 Uiso 0.67 1 calc PR B 1 
CG_158 C 0.5956(5) 0.5659(4) 0.1668(6) 0.043 Uani 0.33 1 d PDU B 2 
HG3_158 H 0.5880 0.5690 0.1765 0.051 Uiso 0.33 1 calc PR B 2 
HG4_158 H 0.5839 0.5592 0.1576 0.051 Uiso 0.33 1 calc PR B 2 
SD_158 S 0.61955(5) 0.59229(4) 0.15770(2) 0.038 Uani 0.67 1 d PDU B 1 
SD_158 S 0.61993(11) 0.59348(11) 0.15978(6) 0.054 Uani 0.33 1 d PDU B 2 
CE_158 C 0.63009(14) 0.61142(11) 0.17565(7) 0.063 Uani 0.67 1 d PDU B 1 
HE1_158 H 0.6434 0.6266 0.1723 0.094 Uiso 0.67 1 calc PR B 1 
HE2_158 H 0.6352 0.6044 0.1844 0.094 Uiso 0.67 1 calc PR B 1 
HE3_158 H 0.6175 0.6137 0.1801 0.094 Uiso 0.67 1 calc PR B 1 
CE_158 C 0.6210(2) 0.6149(2) 0.17422(15) 0.057 Uani 0.33 1 d PDU B 2 
HE4_158 H 0.6340 0.6305 0.1711 0.085 Uiso 0.33 1 calc PR B 2 
HE5_158 H 0.6235 0.6109 0.1856 0.085 Uiso 0.33 1 calc PR B 2 
HE6_158 H 0.6061 0.6149 0.1738 0.085 Uiso 0.33 1 calc PR B 2 
C_158 C 0.59588(5) 0.54971(5) 0.20316(3) 0.034 Uani 1 1 d DU . . 
O_158 O 0.57680(4) 0.53156(4) 0.20498(2) 0.040 Uani 1 1 d DU B . 
N_159 N 0.60206(4) 0.56924(5) 0.21201(3) 0.034 Uani 1 1 d DU B . 
H0_159 H 0.6158 0.5818 0.2101 0.041 Uiso 1 1 calc R . . 
CA_159 C 0.58661(6) 0.57035(6) 0.22473(4) 0.039 Uani 1 1 d U . . 
HA_159 H 0.5737 0.5539 0.2268 0.046 Uiso 1 1 calc R B . 
CB_159 C 0.60006(6) 0.57982(7) 0.24145(4) 0.044 Uani 1 1 d U B . 
HB1_159 H 0.6048 0.5687 0.2458 0.053 Uiso 1 1 calc R . . 
HB2_159 H 0.6145 0.5951 0.2394 0.053 Uiso 1 1 calc R . . 
OG_159 O 0.58608(5) 0.58288(5) 0.25358(3) 0.050 Uani 1 1 d U . . 
HG_159 H 0.5729(9) 0.5676(9) 0.2570(6) 0.075 Uiso 1 1 d . . . 
C_159 C 0.57530(6) 0.58454(6) 0.21904(4) 0.042 Uani 1 1 d U B . 
O_159 O 0.55401(4) 0.57601(5) 0.22097(4) 0.057 Uani 1 1 d U . . 
N_160 N 0.58890(5) 0.60580(5) 0.21290(3) 0.045 Uani 1 1 d U . . 
H0_160 H 0.6041 0.6112 0.2116 0.054 Uiso 1 1 calc R B . 
CA_160 C 0.57874(7) 0.62038(7) 0.20830(5) 0.055 Uani 1 1 d U B . 
HA1_160 H 0.5716 0.6232 0.2184 0.066 Uiso 1 1 calc R . . 
HA2_160 H 0.5662 0.6121 0.1998 0.066 Uiso 1 1 calc R . . 
C_160 C 0.59718(7) 0.64333(8) 0.20131(6) 0.064 Uani 1 1 d U . . 
O_160 O 0.61713(5) 0.64751(6) 0.19880(5) 0.077 Uani 1 1 d U B . 
N_161 N 0.59022(8) 0.65861(8) 0.19789(9) 0.110 Uani 1 1 d U B . 
H0_161 H 0.5756 0.6550 0.1996 0.132 Uiso 1 1 calc R . . 
CA_161 C 0.60745(12) 0.68152(13) 0.19116(17) 0.172 Uani 1 1 d U . . 
HA1_161 H 0.6150 0.6794 0.1810 0.206 Uiso 1 1 calc R B . 
HA2_161 H 0.6198 0.6903 0.1996 0.206 Uiso 1 1 calc R . . 
C_161 C 0.59522(9) 0.69530(9) 0.18666(9) 0.088 Uani 1 1 d U B . 
O_161 O 0.57411(6) 0.68727(7) 0.18865(6) 0.092 Uani 1 1 d U . . 
N_162 N 0.60961(7) 0.71654(6) 0.18017(5) 0.068 Uani 1 1 d U . . 
H0_162 H 0.6243 0.7207 0.1779 0.082 Uiso 1 1 calc R B . 
CA_162 C 0.60111(9) 0.73267(8) 0.17695(5) 0.066 Uani 1 1 d U B . 
HA_162 H 0.5887 0.7295 0.1855 0.079 Uiso 1 1 calc R . . 
CB_162 C 0.62018(10) 0.75816(8) 0.17883(6) 0.071 Uani 1 1 d U . . 
HB1_162 H 0.6128 0.7681 0.1778 0.086 Uiso 1 1 calc R B . 
HB2_162 H 0.6268 0.7604 0.1903 0.086 Uiso 1 1 calc R . . 
CG_162 C 0.64033(10) 0.76709(8) 0.16640(6) 0.074 Uani 1 1 d U B . 
OD1_162 O 0.64718(6) 0.75417(5) 0.16049(4) 0.069 Uani 1 1 d U . . 
ND2_162 N 0.65126(11) 0.79016(8) 0.16322(7) 0.099 Uani 1 1 d U . . 
HD2A_162 H 0.6638 0.7966 0.1567 0.119 Uiso 1 1 calc R B . 
HD2B_162 H 0.6459 0.7989 0.1676 0.119 Uiso 1 1 calc R . . 
C_162 C 0.58938(9) 0.72842(8) 0.15935(6) 0.068 Uani 1 1 d U . . 
O_162 O 0.59741(7) 0.74290(6) 0.14810(4) 0.076 Uani 1 1 d U B . 
N_163 N 0.56943(8) 0.70811(8) 0.15766(6) 0.081 Uani 1 1 d U B . 
H0_163 H 0.5641 0.6981 0.1661 0.097 Uiso 1 1 calc R . . 
CA_163 C 0.55644(11) 0.70228(11) 0.14218(8) 0.089 Uani 1 1 d U . . 
HA_163 H 0.5675 0.7043 0.1328 0.107 Uiso 1 1 calc R B . 
CB_163 C 0.53644(15) 0.67667(12) 0.14209(11) 0.119 Uani 1 1 d U B . 
HB_163 H 0.5283 0.6741 0.1310 0.143 Uiso 1 1 calc R . . 
CG1_163 C 0.54635(16) 0.66068(13) 0.14252(9) 0.117 Uani 1 1 d U . . 
HG1A_163 H 0.5557 0.6630 0.1323 0.175 Uiso 1 1 calc R B . 
HG1B_163 H 0.5335 0.6443 0.1430 0.175 Uiso 1 1 calc R . . 
HG1C_163 H 0.5564 0.6642 0.1525 0.175 Uiso 1 1 calc R . . 
CG2_163 C 0.51821(18) 0.67199(18) 0.15541(17) 0.172 Uani 1 1 d U . . 
HG2A_163 H 0.5057 0.6555 0.1548 0.257 Uiso 1 1 calc R B . 
HG2B_163 H 0.5115 0.6822 0.1535 0.257 Uiso 1 1 calc R . . 
HG2C_163 H 0.5256 0.6752 0.1665 0.257 Uiso 1 1 calc R . . 
C_163 C 0.54744(11) 0.71969(11) 0.13932(8) 0.088 Uani 1 1 d U B . 
O_163 O 0.54127(9) 0.72785(9) 0.15099(5) 0.108 Uani 1 1 d U . . 
N_164 N 0.54723(9) 0.72513(9) 0.12349(6) 0.089 Uani 1 1 d U . . 
H0_164 H 0.5518 0.7184 0.1159 0.107 Uiso 1 1 calc R B . 
CA_164 C 0.54008(11) 0.74132(11) 0.11775(8) 0.088 Uani 1 1 d U B . 
HA_164 H 0.5419 0.7521 0.1273 0.106 Uiso 1 1 calc R . . 
CB_164 C 0.55635(12) 0.75599(11) 0.10356(9) 0.102 Uani 1 1 d U . . 
HB1_164 H 0.5524 0.7681 0.1003 0.122 Uiso 1 1 calc R B . 
HB2_164 H 0.5536 0.7457 0.0937 0.122 Uiso 1 1 calc R . . 
CG_164 C 0.58237(13) 0.76802(12) 0.10828(10) 0.105 Uani 1 1 d U B . 
HG1_164 H 0.5860 0.7560 0.1126 0.126 Uiso 1 1 calc R . . 
HG2_164 H 0.5919 0.7749 0.0980 0.126 Uiso 1 1 calc R . . 
CD_164 C 0.58932(15) 0.78677(12) 0.12113(11) 0.119 Uani 1 1 d U . . 
OE1_164 O 0.58904(14) 0.80509(9) 0.11785(9) 0.157 Uani 1 1 d U B . 
NE2_164 N 0.59557(12) 0.78331(9) 0.13594(9) 0.120 Uani 1 1 d U B . 
HE2A_164 H 0.5997 0.7941 0.1438 0.144 Uiso 1 1 calc R . . 
HE2B_164 H 0.5957 0.7702 0.1381 0.144 Uiso 1 1 calc R . . 
C_164 C 0.51432(12) 0.72810(11) 0.11264(8) 0.091 Uani 1 1 d U . . 
O_164 O 0.50223(7) 0.70687(7) 0.11484(5) 0.090 Uani 1 1 d U B . 
N_165 N 0.50567(10) 0.74044(10) 0.10446(8) 0.111 Uani 1 1 d DU B . 
H0_165 H 0.5150 0.7550 0.1012 0.133 Uiso 1 1 calc R N 1 
C_165 C 0.47274(16) 0.70908(19) 0.08837(15) 0.107 Uani 0.72 1 d PDU B 1 
C_165 C 0.4723(4) 0.7082(4) 0.0890(3) 0.112 Uani 0.28 1 d PDU B 2 
O_165 O 0.45273(16) 0.6936(2) 0.08731(17) 0.167 Uani 0.72 1 d PDU B 1 
O_165 O 0.4523(3) 0.6926(4) 0.09074(13) 0.090 Uani 0.28 1 d PDU B 2 
CA_165 C 0.48037(17) 0.7286(2) 0.10123(15) 0.115 Uani 0.72 1 d PDU B 1 
HA_165 H 0.4720 0.7216 0.1120 0.139 Uiso 0.72 1 calc PR B 1 
CA_165 C 0.4813(3) 0.7304(4) 0.0996(3) 0.133 Uani 0.28 1 d PDU B 2 
HA1_165 H 0.4715 0.7266 0.1100 0.160 Uiso 0.28 1 calc PR B 2 
CB_165 C 0.4737(3) 0.7472(3) 0.09547(18) 0.147 Uani 0.72 1 d PDU B 1 
HB1_165 H 0.4564 0.7397 0.0945 0.177 Uiso 0.72 1 calc PR B 1 
HB2_165 H 0.4791 0.7599 0.1040 0.177 Uiso 0.72 1 calc PR B 1 
CB_165 C 0.4773(4) 0.7476(5) 0.0888(5) 0.164 Uani 0.28 1 d PDU B 2 
HB3_165 H 0.4831 0.7627 0.0949 0.197 Uiso 0.28 1 calc PR B 2 
HB4_165 H 0.4861 0.7508 0.0781 0.197 Uiso 0.28 1 calc PR B 2 
OG_165 O 0.4843(2) 0.75718(19) 0.07948(15) 0.177 Uani 0.72 1 d PDU B 1 
OG_165 O 0.4525(4) 0.7372(5) 0.0855(7) 0.281 Uani 0.28 1 d PDU B 2 
N_166 N 0.4892(2) 0.7098(2) 0.07786(15) 0.082 Uani 0.72 1 d PDU B 1 
H0_166 H 0.5035 0.7221 0.0784 0.099 Uiso 0.72 1 calc PR B 1 
N_166 N 0.4879(6) 0.7089(7) 0.0781(5) 0.094 Uani 0.28 1 d PDU B 2 
H0A_166 H 0.5020 0.7215 0.0784 0.113 Uiso 0.28 1 calc PR B 2 
CA_166 C 0.48443(9) 0.69139(9) 0.06575(7) 0.083 Uani 1 1 d DU . . 
HA_166 H 0.4682 0.6856 0.0614 0.099 Uiso 1 1 calc R B 1 
CB_166 C 0.50090(11) 0.70088(10) 0.05078(7) 0.092 Uani 1 1 d U B . 
HB1_166 H 0.4950 0.6889 0.0417 0.110 Uiso 1 1 calc R . . 
HB2_166 H 0.5009 0.7150 0.0464 0.110 Uiso 1 1 calc R . . 
CG_166 C 0.52566(9) 0.70721(8) 0.05519(6) 0.074 Uani 1 1 d U . . 
OD1_166 O 0.53191(6) 0.70790(6) 0.06978(4) 0.072 Uani 1 1 d U B . 
ND2_166 N 0.54060(9) 0.71197(8) 0.04237(5) 0.090 Uani 1 1 d U B . 
HD2A_166 H 0.5552 0.7157 0.0444 0.107 Uiso 1 1 calc R . . 
HD2B_166 H 0.5358 0.7114 0.0320 0.107 Uiso 1 1 calc R . . 
C_166 C 0.48482(8) 0.67025(9) 0.07346(6) 0.072 Uani 1 1 d U B . 
O_166 O 0.48228(7) 0.65397(6) 0.06427(4) 0.083 Uani 1 1 d U . . 
N_167 N 0.48774(7) 0.67018(7) 0.08987(5) 0.066 Uani 1 1 d U . . 
H0_167 H 0.4901 0.6825 0.0958 0.079 Uiso 1 1 calc R B . 
CA_167 C 0.48714(8) 0.65014(8) 0.09844(6) 0.065 Uani 1 1 d U B . 
HA1_167 H 0.4755 0.6355 0.0927 0.078 Uiso 1 1 calc R . . 
HA2_167 H 0.4816 0.6495 0.1101 0.078 Uiso 1 1 calc R . . 
C_167 C 0.51042(8) 0.65055(7) 0.09905(5) 0.058 Uani 1 1 d U . . 
O_167 O 0.51133(6) 0.63433(6) 0.10572(4) 0.072 Uani 1 1 d U B . 
N_168 N 0.52915(6) 0.66893(6) 0.09270(4) 0.056 Uani 1 1 d U B . 
H0_168 H 0.5278 0.6805 0.0883 0.068 Uiso 1 1 calc R . . 
CA_168 C 0.55220(7) 0.67050(7) 0.09290(4) 0.053 Uani 1 1 d U . . 
HA_168 H 0.5524 0.6612 0.1028 0.064 Uiso 1 1 calc R B . 
CB_168 C 0.55568(8) 0.65909(7) 0.07704(5) 0.057 Uani 1 1 d U B . 
HB1_168 H 0.5704 0.6585 0.0783 0.068 Uiso 1 1 calc R . . 
HB2_168 H 0.5425 0.6427 0.0762 0.068 Uiso 1 1 calc R . . 
CG_168 C 0.55697(8) 0.67193(8) 0.06112(5) 0.062 Uani 1 1 d U . . 
OD1_168 O 0.57284(6) 0.69287(6) 0.05925(4) 0.082 Uani 1 1 d U B . 
ND2_168 N 0.54138(7) 0.66044(7) 0.04942(4) 0.071 Uani 1 1 d U B . 
HD2A_168 H 0.5418 0.6674 0.0399 0.085 Uiso 1 1 calc R . . 
HD2B_168 H 0.5304 0.6457 0.0511 0.085 Uiso 1 1 calc R . . 
C_168 C 0.57112(7) 0.69587(7) 0.09588(4) 0.054 Uani 1 1 d U B . 
O_168 O 0.56618(6) 0.71170(5) 0.09665(4) 0.065 Uani 1 1 d U . . 
N_169 N 0.59314(6) 0.70006(5) 0.09792(4) 0.050 Uani 1 1 d U . . 
H0_169 H 0.5957 0.6882 0.0989 0.061 Uiso 1 1 calc R B . 
CA_169 C 0.61283(8) 0.72404(7) 0.09844(5) 0.056 Uani 1 1 d U B . 
HA_169 H 0.6060 0.7345 0.0968 0.068 Uiso 1 1 calc R . . 
CB_169 C 0.62529(8) 0.73081(7) 0.11553(5) 0.057 Uani 1 1 d U . . 
HB1_169 H 0.6382 0.7474 0.1150 0.068 Uiso 1 1 calc R B . 
HB2_169 H 0.6140 0.7298 0.1242 0.068 Uiso 1 1 calc R . . 
CG_169 C 0.63529(7) 0.71537(7) 0.12071(4) 0.052 Uani 1 1 d U B . 
OD1_169 O 0.63633(5) 0.70180(5) 0.11059(3) 0.055 Uani 1 1 d U . . 
ND2_169 N 0.64342(7) 0.71820(6) 0.13645(4) 0.060 Uani 1 1 d U . . 
HD2A_169 H 0.6499 0.7101 0.1400 0.072 Uiso 1 1 calc R B . 
HD2B_169 H 0.6423 0.7282 0.1432 0.072 Uiso 1 1 calc R . . 
C_169 C 0.62985(8) 0.72923(7) 0.08376(5) 0.059 Uani 1 1 d U . . 
O_169 O 0.65033(6) 0.74534(5) 0.08465(4) 0.070 Uani 1 1 d U B . 
N_170 N 0.62038(7) 0.71613(6) 0.06995(4) 0.063 Uani 1 1 d DU B . 
H0_170 H 0.6054 0.7053 0.0698 0.075 Uiso 1 1 calc R O 1 
CA_170 C 0.63505(14) 0.72000(12) 0.05523(8) 0.079 Uani 0.80 1 d PDU B 1 
HA_170 H 0.6508 0.7231 0.0592 0.095 Uiso 0.80 1 calc PR B 1 
CA_170 C 0.6323(3) 0.7185(3) 0.0541(2) 0.064 Uani 0.20 1 d PDU B 2 
HA1_170 H 0.6471 0.7183 0.0564 0.077 Uiso 0.20 1 calc PR B 2 
CB_170 C 0.62457(15) 0.69820(12) 0.04437(9) 0.089 Uani 0.80 1 d PDU B 1 
HB1_170 H 0.6349 0.7013 0.0345 0.107 Uiso 0.80 1 calc PR B 1 
HB2_170 H 0.6091 0.6952 0.0402 0.107 Uiso 0.80 1 calc PR B 1 
CB_170 C 0.6175(4) 0.6985(2) 0.04174(18) 0.054 Uani 0.20 1 d PDU B 2 
HB3_170 H 0.6271 0.7003 0.0317 0.065 Uiso 0.20 1 calc PR B 2 
HB4_170 H 0.6039 0.7000 0.0380 0.065 Uiso 0.20 1 calc PR B 2 
SG_170 S 0.62056(4) 0.67195(3) 0.05489(2) 0.093 Uani 0.80 1 d PDU B 1 
SG1_170 S 0.60663(14) 0.66934(9) 0.05049(7) 0.073 Uani 0.20 1 d PDU B 2 
C_170 C 0.63878(10) 0.74162(9) 0.04498(6) 0.081 Uani 1 1 d DU . . 
O_170 O 0.65530(8) 0.75020(8) 0.03501(5) 0.105 Uani 1 1 d DU B . 
N_171 N 0.62484(9) 0.75001(7) 0.04777(5) 0.082 Uani 1 1 d DU B . 
H0_171 H 0.6141 0.7436 0.0557 0.098 Uiso 1 1 calc R . . 
CA_171 C 0.62650(12) 0.76960(10) 0.03816(7) 0.098 Uani 1 1 d U . . 
HA1_171 H 0.6105 0.7670 0.0363 0.118 Uiso 1 1 calc R B . 
HA2_171 H 0.6333 0.7699 0.0270 0.118 Uiso 1 1 calc R . . 
C_171 C 0.64146(13) 0.79348(11) 0.04667(8) 0.104 Uani 1 1 d U B . 
O_171 O 0.64193(11) 0.81088(8) 0.04016(7) 0.132 Uani 1 1 d U . . 
N_172 N 0.65361(10) 0.79425(8) 0.06002(6) 0.097 Uani 1 1 d U . . 
H0_172 H 0.6513 0.7809 0.0643 0.116 Uiso 1 1 calc R B . 
CA_172 C 0.67092(12) 0.81639(10) 0.06821(9) 0.101 Uani 1 1 d U B . 
HA_172 H 0.6720 0.8298 0.0615 0.122 Uiso 1 1 calc R . . 
CB_172 C 0.66378(13) 0.81828(10) 0.08580(9) 0.105 Uani 1 1 d U . . 
HB_172 H 0.6762 0.8338 0.0902 0.126 Uiso 1 1 calc R B . 
CG2_172 C 0.64021(17) 0.81899(17) 0.08559(13) 0.138 Uani 1 1 d U B . 
HG2A_172 H 0.6417 0.8312 0.0778 0.207 Uiso 1 1 calc R . . 
HG2B_172 H 0.6369 0.8224 0.0969 0.207 Uiso 1 1 calc R . . 
HG2C_172 H 0.6273 0.8037 0.0819 0.207 Uiso 1 1 calc R . . 
CG1_172 C 0.66273(17) 0.79987(11) 0.09770(8) 0.114 Uani 1 1 d U B . 
HG1A_172 H 0.6782 0.8007 0.0975 0.137 Uiso 1 1 calc R . . 
HG1B_172 H 0.6510 0.7842 0.0933 0.137 Uiso 1 1 calc R . . 
CD1_172 C 0.65664(14) 0.80136(11) 0.11595(9) 0.105 Uani 1 1 d U . . 
HD1A_172 H 0.6558 0.7881 0.1223 0.158 Uiso 1 1 calc R B . 
HD1B_172 H 0.6414 0.8007 0.1165 0.158 Uiso 1 1 calc R . . 
HD1C_172 H 0.6688 0.8162 0.1209 0.158 Uiso 1 1 calc R . . 
C_172 C 0.69461(12) 0.81732(10) 0.06715(8) 0.098 Uani 1 1 d U . . 
O_172 O 0.69539(8) 0.79878(7) 0.06587(5) 0.097 Uani 1 1 d U B . 
N_173 N 0.71402(11) 0.83804(9) 0.06857(8) 0.112 Uani 1 1 d U B . 
CD_173 C 0.71562(17) 0.86144(12) 0.06896(14) 0.152 Uani 1 1 d U . . 
HD1_173 H 0.7137 0.8657 0.0806 0.182 Uiso 1 1 calc R B . 
HD2_173 H 0.7035 0.8617 0.0616 0.182 Uiso 1 1 calc R . . 
CA_173 C 0.73684(14) 0.83993(14) 0.06725(10) 0.127 Uani 1 1 d U . . 
HA_173 H 0.7386 0.8335 0.0563 0.152 Uiso 1 1 calc R B . 
CB_173 C 0.75388(18) 0.86738(15) 0.06822(14) 0.173 Uani 1 1 d U B . 
HB1_173 H 0.7594 0.8723 0.0799 0.207 Uiso 1 1 calc R . . 
HB2_173 H 0.7677 0.8723 0.0608 0.207 Uiso 1 1 calc R . . 
CG_173 C 0.7397(2) 0.87764(17) 0.06249(19) 0.188 Uani 1 1 d U B . 
HG1_173 H 0.7397 0.8785 0.0501 0.225 Uiso 1 1 calc R . . 
HG2_173 H 0.7459 0.8936 0.0671 0.225 Uiso 1 1 calc R . . 
C_173 C 0.74122(12) 0.82787(10) 0.08211(8) 0.097 Uani 1 1 d U B . 
O_173 O 0.73274(7) 0.82655(6) 0.09580(5) 0.096 Uani 1 1 d U . . 
N_174 N 0.75680(11) 0.82124(10) 0.07894(7) 0.107 Uani 1 1 d U . . 
H0_174 H 0.7632 0.8237 0.0689 0.128 Uiso 1 1 calc R B . 
CA_174 C 0.76362(12) 0.80963(11) 0.09217(7) 0.095 Uani 1 1 d U B . 
HA_174 H 0.7495 0.7942 0.0951 0.114 Uiso 1 1 calc R . . 
CB_174 C 0.78313(14) 0.80508(14) 0.08579(9) 0.112 Uani 1 1 d U . . 
HB1_174 H 0.7775 0.7949 0.0759 0.169 Uiso 1 1 calc R B . 
HB2_174 H 0.7873 0.7974 0.0947 0.169 Uiso 1 1 calc R . . 
HB3_174 H 0.7970 0.8201 0.0828 0.169 Uiso 1 1 calc R . . 
C_174 C 0.77189(11) 0.82452(10) 0.10768(8) 0.094 Uani 1 1 d U . . 
O_174 O 0.76661(8) 0.81507(7) 0.12187(5) 0.094 Uani 1 1 d U B . 
N_175 N 0.78477(9) 0.84817(9) 0.10672(8) 0.108 Uani 1 1 d U B . 
H0_175 H 0.7881 0.8546 0.0966 0.130 Uiso 1 1 calc R . . 
CA_175 C 0.79316(14) 0.86308(12) 0.12053(11) 0.121 Uani 1 1 d U . . 
HA_175 H 0.8033 0.8586 0.1271 0.145 Uiso 1 1 calc R B . 
CB_175 C 0.80883(18) 0.88860(15) 0.11481(16) 0.163 Uani 1 1 d U B . 
HB1_175 H 0.8157 0.8990 0.1247 0.196 Uiso 1 1 calc R . . 
HB2_175 H 0.8218 0.8899 0.1077 0.196 Uiso 1 1 calc R . . 
OG_175 O 0.79419(16) 0.89546(11) 0.10526(12) 0.195 Uani 1 1 d U . . 
HG_175 H 0.7953 0.8933 0.0949 0.292 Uiso 1 1 calc R B . 
C_175 C 0.77428(14) 0.86136(12) 0.13225(10) 0.117 Uani 1 1 d U B . 
O_175 O 0.77907(12) 0.86930(12) 0.14698(8) 0.150 Uani 1 1 d U . . 
N_176 N 0.7523(3) 0.8521(2) 0.1259(3) 0.098 Uani 0.62 1 d PDU B 1 
H0_176 H 0.7499 0.8470 0.1155 0.117 Uiso 0.62 1 calc PR B 1 
N_176 N 0.7525(6) 0.8530(6) 0.1263(4) 0.106 Uani 0.38 1 d PDU B 2 
H0A_176 H 0.7500 0.8488 0.1157 0.128 Uiso 0.38 1 calc PR B 2 
CA_176 C 0.7325(4) 0.8500(3) 0.1353(2) 0.105 Uani 0.62 1 d PDU B 1 
HA_176 H 0.7387 0.8608 0.1453 0.126 Uiso 0.62 1 calc PR B 1 
CA_176 C 0.7327(6) 0.8503(5) 0.1361(4) 0.105 Uani 0.38 1 d PDU B 2 
HA1_176 H 0.7389 0.8607 0.1463 0.126 Uiso 0.38 1 calc PR B 2 
CB_176 C 0.7180(3) 0.8575(2) 0.1247(3) 0.111 Uani 0.62 1 d PDU B 1 
HB1_176 H 0.7036 0.8540 0.1309 0.134 Uiso 0.62 1 calc PR B 1 
HB2_176 H 0.7132 0.8482 0.1142 0.134 Uiso 0.62 1 calc PR B 1 
CB_176 C 0.7187(7) 0.8586(5) 0.1255(6) 0.158 Uani 0.38 1 d PDU B 2 
HB3_176 H 0.7049 0.8566 0.1320 0.190 Uiso 0.38 1 calc PR B 2 
HB4_176 H 0.7129 0.8489 0.1152 0.190 Uiso 0.38 1 calc PR B 2 
CG_176 C 0.7317(4) 0.8840(3) 0.1201(3) 0.175 Uani 0.62 1 d PDU B 1 
HG1_176 H 0.7346 0.8933 0.1305 0.210 Uiso 0.62 1 calc PR B 1 
HG2_176 H 0.7472 0.8879 0.1154 0.210 Uiso 0.62 1 calc PR B 1 
CG_176 C 0.7341(7) 0.8847(5) 0.1206(5) 0.230 Uani 0.38 1 d PDU B 2 
HG3_176 H 0.7453 0.8860 0.1117 0.276 Uiso 0.38 1 calc PR B 2 
HG4_176 H 0.7239 0.8904 0.1157 0.276 Uiso 0.38 1 calc PR B 2 
CD_176 C 0.7185(3) 0.8905(2) 0.1075(2) 0.236 Uani 0.62 1 d PDU B 1 
CD_176 C 0.7479(5) 0.9005(4) 0.1350(5) 0.265 Uani 0.38 1 d PDU B 2 
OE1_176 O 0.6964(3) 0.8783(2) 0.10615(19) 0.206 Uani 0.62 1 d PDU B 1 
OE1_176 O 0.7403(10) 0.9023(7) 0.1488(6) 0.448 Uani 0.38 1 d PDU B 2 
NE2_176 N 0.7326(4) 0.9103(3) 0.0995(3) 0.276 Uani 0.62 1 d PDU B 1 
HE2A_176 H 0.7268 0.9163 0.0923 0.331 Uiso 0.62 1 calc PR B 1 
HE2B_176 H 0.7478 0.9175 0.1014 0.331 Uiso 0.62 1 calc PR B 1 
NE2_176 N 0.7713(5) 0.9133(5) 0.1323(6) 0.281 Uani 0.38 1 d PDU B 2 
HE2C_176 H 0.7806 0.9226 0.1403 0.338 Uiso 0.38 1 calc PR B 2 
HE2D_176 H 0.7772 0.9124 0.1226 0.338 Uiso 0.38 1 calc PR B 2 
C_176 C 0.7160(3) 0.8253(3) 0.1418(2) 0.091 Uani 0.62 1 d PDU B 1 
C_176 C 0.7165(5) 0.8254(6) 0.1421(4) 0.088 Uani 0.38 1 d PDU B 2 
O_176 O 0.6990(4) 0.8215(3) 0.1500(3) 0.119 Uani 0.62 1 d PDU B 1 
O_176 O 0.6993(5) 0.8205(6) 0.1507(4) 0.104 Uani 0.38 1 d PDU B 2 
N_177 N 0.72141(8) 0.80839(7) 0.13750(5) 0.080 Uani 1 1 d DU . . 
H0_177 H 0.7344 0.8122 0.1319 0.096 Uiso 1 1 calc R B 1 
CA_177 C 0.70574(10) 0.78405(8) 0.14221(6) 0.075 Uani 1 1 d U B . 
HA_177 H 0.6893 0.7811 0.1424 0.090 Uiso 1 1 calc R . . 
CB_177 C 0.70724(9) 0.76788(8) 0.12946(6) 0.072 Uani 1 1 d U . . 
HB1_177 H 0.6972 0.7514 0.1332 0.086 Uiso 1 1 calc R B . 
HB2_177 H 0.7236 0.7711 0.1291 0.086 Uiso 1 1 calc R . . 
CG_177 C 0.69976(9) 0.77032(8) 0.11169(6) 0.076 Uani 1 1 d U B . 
HG1_177 H 0.6833 0.7671 0.1119 0.091 Uiso 1 1 calc R . . 
HG2_177 H 0.7099 0.7866 0.1077 0.091 Uiso 1 1 calc R . . 
CD_177 C 0.70159(10) 0.75359(9) 0.09974(6) 0.077 Uani 1 1 d U . . 
HD1_177 H 0.7166 0.7538 0.1017 0.092 Uiso 1 1 calc R B . 
HD2_177 H 0.6885 0.7374 0.1018 0.092 Uiso 1 1 calc R . . 
NE_177 N 0.70066(9) 0.76017(8) 0.08254(6) 0.085 Uani 1 1 d U B . 
HE_177 H 0.6904 0.7646 0.0801 0.102 Uiso 1 1 calc R . . 
CZ_177 C 0.71404(12) 0.76008(10) 0.07017(7) 0.088 Uani 1 1 d U . . 
NH1_177 N 0.72824(10) 0.75156(10) 0.07224(6) 0.100 Uani 1 1 d U B . 
HH1A_177 H 0.7365 0.7511 0.0637 0.120 Uiso 1 1 calc R . . 
HH1B_177 H 0.7295 0.7463 0.0822 0.120 Uiso 1 1 calc R . . 
NH2_177 N 0.71251(15) 0.76781(13) 0.05520(7) 0.133 Uani 1 1 d U B . 
HH2A_177 H 0.7209 0.7672 0.0468 0.160 Uiso 1 1 calc R . . 
HH2B_177 H 0.7031 0.7736 0.0536 0.160 Uiso 1 1 calc R . . 
C_177 C 0.71146(9) 0.77821(9) 0.15928(7) 0.079 Uani 1 1 d U . . 
O_177 O 0.73205(7) 0.78532(8) 0.16348(6) 0.110 Uani 1 1 d U B . 
N_178 N 0.69328(7) 0.76425(6) 0.16872(4) 0.066 Uani 1 1 d DU B . 
H0_178 H 0.6794 0.7618 0.1656 0.079 Uiso 1 1 calc R P 1 
CA_178 C 0.69461(9) 0.75260(8) 0.18393(6) 0.070 Uani 0.98 1 d PDU B 1 
HA_178 H 0.7109 0.7553 0.1851 0.085 Uiso 0.98 1 calc PR B 1 
CA_178 C 0.6955(5) 0.7526(4) 0.1836(4) 0.066 Uani 0.02 1 d PDU B 2 
HA1_178 H 0.7117 0.7547 0.1838 0.079 Uiso 0.02 1 calc PR B 2 
CB_178 C 0.68871(13) 0.76212(11) 0.19944(6) 0.088 Uani 0.98 1 d PDU B 1 
HB1_178 H 0.7004 0.7790 0.2009 0.105 Uiso 0.98 1 calc PR B 1 
HB2_178 H 0.6730 0.7605 0.1982 0.105 Uiso 0.98 1 calc PR B 1 
CB_178 C 0.6917(14) 0.7626(10) 0.1998(5) 0.074 Uani 0.02 1 d PDU B 2 
HB3_178 H 0.6903 0.7522 0.2093 0.089 Uiso 0.02 1 calc PR B 2 
HB4_178 H 0.7054 0.7783 0.2019 0.089 Uiso 0.02 1 calc PR B 2 
OG_178 O 0.68896(11) 0.74931(9) 0.21374(5) 0.117 Uani 0.98 1 d PDU B 1 
OG_178 O 0.6712(15) 0.7645(13) 0.1990(7) 0.046 Uani 0.02 1 d PDU B 2 
C_178 C 0.67781(8) 0.72661(7) 0.18158(5) 0.064 Uani 1 1 d DU . . 
O_178 O 0.65659(6) 0.71866(6) 0.18226(6) 0.096 Uani 1 1 d DU B . 
N_179 N 0.68742(6) 0.71356(5) 0.17829(4) 0.052 Uani 1 1 d DU B . 
H0_179 H 0.7028 0.7205 0.1776 0.062 Uiso 1 1 calc R . . 
CA_179 C 0.67366(6) 0.68813(6) 0.17569(4) 0.048 Uani 1 1 d U . . 
HA_179 H 0.6565 0.6827 0.1769 0.057 Uiso 1 1 calc R B . 
CB_179 C 0.67820(7) 0.68168(7) 0.15832(4) 0.049 Uani 1 1 d U B . 
HB1_179 H 0.6952 0.6873 0.1569 0.059 Uiso 1 1 calc R . . 
HB2_179 H 0.6694 0.6644 0.1568 0.059 Uiso 1 1 calc R . . 
OG_179 O 0.67063(6) 0.69256(6) 0.14617(3) 0.062 Uani 1 1 d U . . 
HG_179 H 0.6777 0.6941 0.1370 0.093 Uiso 1 1 calc R B . 
C_179 C 0.68128(6) 0.67699(6) 0.18958(4) 0.046 Uani 1 1 d U B . 
O_179 O 0.70189(5) 0.68201(6) 0.19055(3) 0.062 Uani 1 1 d U . . 
N_180 N 0.66468(5) 0.66309(5) 0.20042(3) 0.042 Uani 1 1 d U . . 
H0_180 H 0.6498 0.6579 0.1979 0.050 Uiso 1 1 calc R B . 
CA_180 C 0.67035(6) 0.65615(6) 0.21637(4) 0.042 Uani 1 1 d U B . 
HA_180 H 0.6878 0.6650 0.2181 0.051 Uiso 1 1 calc R . . 
CB_180 C 0.65839(7) 0.66170(7) 0.23077(4) 0.050 Uani 1 1 d U . . 
HB1_180 H 0.6623 0.6567 0.2415 0.061 Uiso 1 1 calc R B . 
HB2_180 H 0.6412 0.6522 0.2292 0.061 Uiso 1 1 calc R . . 
CG_180 C 0.66533(8) 0.68782(7) 0.23226(5) 0.060 Uani 1 1 d U B . 
HG_180 H 0.6612 0.6926 0.2214 0.072 Uiso 1 1 calc R . . 
CD1_180 C 0.65098(12) 0.69071(11) 0.24619(8) 0.095 Uani 1 1 d U . . 
HD1A_180 H 0.6343 0.6825 0.2430 0.142 Uiso 1 1 calc R B . 
HD1B_180 H 0.6565 0.7075 0.2479 0.142 Uiso 1 1 calc R . . 
HD1C_180 H 0.6529 0.6840 0.2567 0.142 Uiso 1 1 calc R . . 
CD2_180 C 0.69101(10) 0.70344(9) 0.23501(8) 0.087 Uani 1 1 d U . . 
HD2A_180 H 0.6996 0.7026 0.2252 0.130 Uiso 1 1 calc R B . 
HD2B_180 H 0.6958 0.6983 0.2451 0.130 Uiso 1 1 calc R . . 
HD2C_180 H 0.6944 0.7197 0.2366 0.130 Uiso 1 1 calc R . . 
C_180 C 0.66167(5) 0.62991(6) 0.21655(4) 0.041 Uani 1 1 d U . . 
O_180 O 0.64118(4) 0.61573(4) 0.21278(3) 0.047 Uani 1 1 d U B . 
N_181 N 0.67718(5) 0.62379(5) 0.22193(3) 0.040 Uani 1 1 d U B . 
H0_181 H 0.6915 0.6348 0.2246 0.048 Uiso 1 1 calc R . . 
CA_181 C 0.67088(6) 0.59947(6) 0.22351(4) 0.039 Uani 1 1 d U . . 
HA_181 H 0.6536 0.5899 0.2215 0.046 Uiso 1 1 calc R B . 
CB_181 C 0.68283(6) 0.59186(6) 0.21005(4) 0.045 Uani 1 1 d U B . 
HB1_181 H 0.6755 0.5745 0.2105 0.054 Uiso 1 1 calc R . . 
HB2_181 H 0.6793 0.5959 0.1988 0.054 Uiso 1 1 calc R . . 
CG_181 C 0.70918(6) 0.60236(6) 0.21138(4) 0.044 Uani 1 1 d U . . 
CD1_181 C 0.71876(7) 0.59207(6) 0.22158(4) 0.049 Uani 1 1 d U B . 
HD1_181 H 0.7087 0.5793 0.2286 0.059 Uiso 1 1 calc R . . 
CD2_181 C 0.72427(7) 0.62169(7) 0.20159(4) 0.050 Uani 1 1 d U B . 
HD2_181 H 0.7182 0.6295 0.1950 0.060 Uiso 1 1 calc R . . 
CE1_181 C 0.74265(7) 0.60017(8) 0.22162(5) 0.057 Uani 1 1 d U . . 
HE1_181 H 0.7489 0.5930 0.2287 0.069 Uiso 1 1 calc R B . 
CE2_181 C 0.74829(7) 0.62946(7) 0.20157(5) 0.056 Uani 1 1 d U . . 
HE2_181 H 0.7585 0.6424 0.1947 0.067 Uiso 1 1 calc R B . 
CZ_181 C 0.75740(7) 0.61867(8) 0.21141(5) 0.060 Uani 1 1 d U B . 
HZ_181 H 0.7738 0.6240 0.2112 0.072 Uiso 1 1 calc R . . 
C_181 C 0.67517(5) 0.59394(6) 0.24137(4) 0.037 Uani 1 1 d U B . 
O_181 O 0.69058(4) 0.60830(4) 0.25052(3) 0.042 Uani 1 1 d U . . 
N_182 N 0.66028(5) 0.57163(5) 0.24598(3) 0.038 Uani 1 1 d U . . 
H0_182 H 0.6485 0.5628 0.2392 0.045 Uiso 1 1 calc R B . 
CA_182 C 0.66247(6) 0.56119(6) 0.26158(3) 0.038 Uani 1 1 d U B . 
HA_182 H 0.6681 0.5730 0.2709 0.046 Uiso 1 1 calc R . . 
CB_182 C 0.63842(6) 0.54044(6) 0.26585(4) 0.042 Uani 1 1 d U . . 
HB1_182 H 0.6324 0.5301 0.2559 0.050 Uiso 1 1 calc R B . 
HB2_182 H 0.6275 0.5465 0.2680 0.050 Uiso 1 1 calc R . . 
CG_182 C 0.63756(7) 0.52553(7) 0.28100(4) 0.049 Uani 1 1 d U B . 
HG1_182 H 0.6236 0.5097 0.2799 0.059 Uiso 1 1 calc R . . 
HG2_182 H 0.6516 0.5237 0.2807 0.059 Uiso 1 1 calc R . . 
CD_182 C 0.63663(7) 0.53569(7) 0.29795(4) 0.051 Uani 1 1 d U . . 
OE1_182 O 0.64987(6) 0.55769(5) 0.30039(3) 0.068 Uani 1 1 d U B . 
OE2_182 O 0.62276(5) 0.52201(5) 0.30878(3) 0.052 Uani 1 1 d U B . 
C_182 C 0.68004(6) 0.55282(6) 0.25853(3) 0.038 Uani 1 1 d U . . 
O_182 O 0.67762(4) 0.53940(4) 0.24669(2) 0.043 Uani 1 1 d U B . 
N_183 N 0.69815(5) 0.56087(5) 0.26919(3) 0.042 Uani 1 1 d U B . 
H0_183 H 0.6993 0.5705 0.2773 0.050 Uiso 1 1 calc R . . 
CA_183 C 0.71603(6) 0.55412(6) 0.26767(4) 0.042 Uani 1 1 d U . . 
HA_183 H 0.7243 0.5598 0.2566 0.051 Uiso 1 1 calc R B . 
CB_183 C 0.73376(6) 0.56541(6) 0.28206(4) 0.046 Uani 1 1 d U B . 
HB1_183 H 0.7251 0.5617 0.2929 0.055 Uiso 1 1 calc R . . 
HB2_183 H 0.7441 0.5585 0.2824 0.055 Uiso 1 1 calc R . . 
CG_183 C 0.74902(7) 0.59216(7) 0.28035(4) 0.053 Uani 1 1 d U . . 
HG1_183 H 0.7595 0.5958 0.2705 0.063 Uiso 1 1 calc R B . 
HG2_183 H 0.7387 0.5989 0.2782 0.063 Uiso 1 1 calc R . . 
CD_183 C 0.76372(8) 0.60350(8) 0.29586(5) 0.066 Uani 1 1 d U B . 
HD1_183 H 0.7744 0.6204 0.2936 0.079 Uiso 1 1 calc R . . 
HD2_183 H 0.7532 0.6022 0.3053 0.079 Uiso 1 1 calc R . . 
NE_183 N 0.77754(7) 0.59287(7) 0.30089(4) 0.065 Uani 1 1 d U . . 
HE_183 H 0.7886 0.5944 0.2939 0.078 Uiso 1 1 calc R B . 
CZ_183 C 0.77521(8) 0.58113(8) 0.31489(5) 0.066 Uani 1 1 d U B . 
NH1_183 N 0.76044(8) 0.57825(9) 0.32677(5) 0.082 Uani 1 1 d U . . 
HH1A_183 H 0.7512 0.5843 0.3257 0.098 Uiso 1 1 calc R B . 
HH1B_183 H 0.7597 0.5702 0.3359 0.098 Uiso 1 1 calc R . . 
NH2_183 N 0.78858(9) 0.57113(10) 0.31659(6) 0.089 Uani 1 1 d U . . 
HH2A_183 H 0.7872 0.5628 0.3256 0.107 Uiso 1 1 calc R B . 
HH2B_183 H 0.7987 0.5729 0.3087 0.107 Uiso 1 1 calc R . . 
C_183 C 0.70526(6) 0.52773(6) 0.26879(4) 0.041 Uani 1 1 d U B . 
O_183 O 0.68983(4) 0.51544(4) 0.27911(3) 0.049 Uani 1 1 d U . . 
N_184 N 0.71483(5) 0.51865(5) 0.25842(3) 0.042 Uani 1 1 d U . . 
H0_184 H 0.7268 0.5281 0.2520 0.050 Uiso 1 1 calc R B . 
CA_184 C 0.70560(6) 0.49341(6) 0.25769(4) 0.040 Uani 1 1 d U B . 
HA_184 H 0.6881 0.4854 0.2569 0.048 Uiso 1 1 calc R . . 
CB_184 C 0.71500(6) 0.48755(6) 0.24177(4) 0.041 Uani 1 1 d U . . 
HB1_184 H 0.7102 0.4933 0.2318 0.050 Uiso 1 1 calc R B . 
HB2_184 H 0.7324 0.4963 0.2422 0.050 Uiso 1 1 calc R . . 
CG_184 C 0.70673(6) 0.46163(6) 0.23922(4) 0.044 Uani 1 1 d U B . 
HG_184 H 0.7123 0.4561 0.2490 0.053 Uiso 1 1 calc R . . 
CD1_184 C 0.67991(7) 0.44647(7) 0.23823(4) 0.054 Uani 1 1 d U . . 
HD1A_184 H 0.6755 0.4302 0.2357 0.081 Uiso 1 1 calc R B . 
HD1B_184 H 0.6740 0.4525 0.2293 0.081 Uiso 1 1 calc R . . 
HD1C_184 H 0.6730 0.4471 0.2490 0.081 Uiso 1 1 calc R . . 
CD2_184 C 0.71787(8) 0.45875(8) 0.22319(4) 0.058 Uani 1 1 d U . . 
HD2A_184 H 0.7143 0.4424 0.2222 0.087 Uiso 1 1 calc R B . 
HD2B_184 H 0.7349 0.4692 0.2237 0.087 Uiso 1 1 calc R . . 
HD2C_184 H 0.7115 0.4628 0.2134 0.087 Uiso 1 1 calc R . . 
C_184 C 0.71201(6) 0.48395(6) 0.27307(3) 0.039 Uani 1 1 d U . . 
O_184 O 0.69747(4) 0.46452(4) 0.27904(2) 0.042 Uani 1 1 d U B . 
N_185 N 0.73378(5) 0.49679(5) 0.27914(3) 0.045 Uani 1 1 d U B . 
H0_185 H 0.7433 0.5109 0.2751 0.054 Uiso 1 1 calc R . . 
CA_185 C 0.74150(6) 0.48695(7) 0.29274(4) 0.049 Uani 1 1 d U . . 
HA_185 H 0.7412 0.4727 0.2880 0.059 Uiso 1 1 calc R B . 
CB_185 C 0.76722(7) 0.50425(9) 0.29751(5) 0.064 Uani 1 1 d U B . 
HB1_185 H 0.7694 0.5202 0.2989 0.077 Uiso 1 1 calc R . . 
HB2_185 H 0.7709 0.4995 0.3084 0.077 Uiso 1 1 calc R . . 
CG_185 C 0.78381(9) 0.50467(11) 0.28408(7) 0.083 Uani 1 1 d U . . 
HG1_185 H 0.7828 0.4891 0.2837 0.099 Uiso 1 1 calc R B . 
HG2_185 H 0.7787 0.5074 0.2730 0.099 Uiso 1 1 calc R . . 
CD_185 C 0.80831(10) 0.52280(16) 0.28688(7) 0.109 Uani 1 1 d U B . 
OE1_185 O 0.81508(9) 0.53487(16) 0.29927(7) 0.190 Uani 1 1 d U . . 
NE2_185 N 0.82408(9) 0.52589(13) 0.27424(6) 0.115 Uani 1 1 d U . . 
HE2A_185 H 0.8390 0.5367 0.2753 0.138 Uiso 1 1 calc R B . 
HE2B_185 H 0.8192 0.5171 0.2651 0.138 Uiso 1 1 calc R . . 
C_185 C 0.72522(6) 0.47862(6) 0.30799(4) 0.045 Uani 1 1 d U B . 
O_185 O 0.71924(4) 0.45897(5) 0.31386(3) 0.049 Uani 1 1 d U . . 
N_186 N 0.71763(5) 0.49236(5) 0.31472(3) 0.046 Uani 1 1 d U . . 
CD_186 C 0.72519(7) 0.51710(7) 0.31155(5) 0.053 Uani 1 1 d U B . 
HD1_186 H 0.7256 0.5203 0.2993 0.064 Uiso 1 1 calc R . . 
HD2_186 H 0.7409 0.5276 0.3164 0.064 Uiso 1 1 calc R . . 
CA_186 C 0.70227(6) 0.48340(7) 0.32959(4) 0.047 Uani 1 1 d U B . 
HA_186 H 0.7102 0.4790 0.3385 0.057 Uiso 1 1 calc R . . 
CB_186 C 0.70043(8) 0.50472(7) 0.33557(4) 0.057 Uani 1 1 d U . . 
HB1_186 H 0.6844 0.4997 0.3396 0.068 Uiso 1 1 calc R B . 
HB2_186 H 0.7117 0.5130 0.3448 0.068 Uiso 1 1 calc R . . 
CG_186 C 0.70620(9) 0.52022(8) 0.32048(5) 0.065 Uani 1 1 d U B . 
HG1_186 H 0.7123 0.5368 0.3238 0.078 Uiso 1 1 calc R . . 
HG2_186 H 0.6922 0.5151 0.3132 0.078 Uiso 1 1 calc R . . 
C_186 C 0.67849(6) 0.46232(6) 0.32561(4) 0.042 Uani 1 1 d U . . 
O_186 O 0.66697(4) 0.44862(4) 0.33696(3) 0.048 Uani 1 1 d U B . 
N_187 N 0.67014(5) 0.45985(5) 0.30990(3) 0.041 Uani 1 1 d U B . 
H0_187 H 0.6779 0.4708 0.3023 0.049 Uiso 1 1 calc R . . 
CA_187 C 0.64806(6) 0.43886(6) 0.30535(4) 0.041 Uani 1 1 d U . . 
HA_187 H 0.6358 0.4369 0.3137 0.049 Uiso 1 1 calc R B . 
CB_187 C 0.63952(6) 0.44079(6) 0.28765(4) 0.042 Uani 1 1 d U B . 
HB_187 H 0.6504 0.4401 0.2792 0.050 Uiso 1 1 calc R . . 
CG2_187 C 0.61506(7) 0.41971(7) 0.28470(4) 0.050 Uani 1 1 d U . . 
HG2A_187 H 0.6158 0.4052 0.2855 0.075 Uiso 1 1 calc R B . 
HG2B_187 H 0.6095 0.4209 0.2735 0.075 Uiso 1 1 calc R . . 
HG2C_187 H 0.6042 0.4196 0.2932 0.075 Uiso 1 1 calc R . . 
CG1_187 C 0.63998(6) 0.46419(7) 0.28525(4) 0.046 Uani 1 1 d U . . 
HG1A_187 H 0.6297 0.4655 0.2938 0.055 Uiso 1 1 calc R B . 
HG1B_187 H 0.6562 0.4773 0.2871 0.055 Uiso 1 1 calc R . . 
CD1_187 C 0.63181(7) 0.46660(8) 0.26768(4) 0.055 Uani 1 1 d U B . 
HD1A_187 H 0.6351 0.4828 0.2660 0.082 Uiso 1 1 calc R . . 
HD1B_187 H 0.6149 0.4558 0.2666 0.082 Uiso 1 1 calc R . . 
HD1C_187 H 0.6402 0.4628 0.2592 0.082 Uiso 1 1 calc R . . 
C_187 C 0.65085(6) 0.41718(6) 0.30632(3) 0.039 Uani 1 1 d U B . 
O_187 O 0.63621(4) 0.39868(4) 0.31303(3) 0.046 Uani 1 1 d U . . 
N_188 N 0.67024(5) 0.41935(5) 0.29878(3) 0.038 Uani 1 1 d U . . 
H0_188 H 0.6803 0.4327 0.2940 0.045 Uiso 1 1 calc R B . 
CA_188 C 0.67463(6) 0.39983(6) 0.29849(3) 0.039 Uani 1 1 d U B . 
HA_188 H 0.6610 0.3863 0.2927 0.046 Uiso 1 1 calc R . . 
CB_188 C 0.69684(6) 0.40581(6) 0.28856(4) 0.042 Uani 1 1 d U . . 
HB1_188 H 0.6996 0.3923 0.2894 0.050 Uiso 1 1 calc R B . 
HB2_188 H 0.7103 0.4195 0.2940 0.050 Uiso 1 1 calc R . . 
CG_188 C 0.69638(7) 0.41156(6) 0.26975(4) 0.045 Uani 1 1 d U B . 
HG_188 H 0.6935 0.4251 0.2689 0.055 Uiso 1 1 calc R . . 
CD1_188 C 0.72035(8) 0.41887(9) 0.26188(5) 0.062 Uani 1 1 d U . . 
HD1A_188 H 0.7325 0.4331 0.2675 0.093 Uiso 1 1 calc R B . 
HD1B_188 H 0.7200 0.4221 0.2499 0.093 Uiso 1 1 calc R . . 
HD1C_188 H 0.7239 0.4061 0.2632 0.093 Uiso 1 1 calc R . . 
CD2_188 C 0.67699(9) 0.39081(8) 0.26015(4) 0.065 Uani 1 1 d U . . 
HD2A_188 H 0.6616 0.3881 0.2639 0.097 Uiso 1 1 calc R B . 
HD2B_188 H 0.6782 0.3767 0.2623 0.097 Uiso 1 1 calc R . . 
HD2C_188 H 0.6787 0.3943 0.2481 0.097 Uiso 1 1 calc R . . 
C_188 C 0.67614(6) 0.39202(6) 0.31638(4) 0.038 Uani 1 1 d U . . 
O_188 O 0.66555(4) 0.37105(4) 0.32032(2) 0.045 Uani 1 1 d U B . 
N_189 N 0.68996(5) 0.40879(5) 0.32740(3) 0.039 Uani 1 1 d U B . 
H0_189 H 0.6976 0.4237 0.3245 0.046 Uiso 1 1 calc R . . 
CA_189 C 0.69183(6) 0.40144(6) 0.34438(3) 0.042 Uani 1 1 d U . . 
HA_189 H 0.6939 0.3874 0.3432 0.051 Uiso 1 1 calc R B . 
CB_189 C 0.71332(6) 0.42024(7) 0.35345(4) 0.048 Uani 1 1 d U B . 
HB1_189 H 0.7139 0.4148 0.3650 0.057 Uiso 1 1 calc R . . 
HB2_189 H 0.7277 0.4231 0.3474 0.057 Uiso 1 1 calc R . . 
OG_189 O 0.71266(5) 0.44144(5) 0.35436(3) 0.054 Uani 1 1 d U . . 
HG_189 H 0.7258 0.4527 0.3515 0.080 Uiso 1 1 calc R B . 
C_189 C 0.66939(6) 0.39356(6) 0.35449(3) 0.042 Uani 1 1 d U B . 
O_189 O 0.66285(5) 0.37680(5) 0.36440(3) 0.053 Uani 1 1 d U . . 
N_190 N 0.65732(5) 0.40470(5) 0.35249(3) 0.042 Uani 1 1 d DU . . 
H0_190 H 0.6614 0.4162 0.3452 0.051 Uiso 1 1 calc R B 1 
CA_190 C 0.63685(11) 0.39646(12) 0.36332(6) 0.043 Uani 0.59 1 d PDU B 1 
HA_190 H 0.6419 0.3979 0.3754 0.052 Uiso 0.59 1 calc PR B 1 
CA_190 C 0.63414(15) 0.39795(17) 0.36024(9) 0.045 Uani 0.41 1 d PDU B 2 
HA1_190 H 0.6370 0.4026 0.3724 0.055 Uiso 0.41 1 calc PR B 2 
CB_190 C 0.62490(11) 0.41114(12) 0.36043(8) 0.047 Uani 0.59 1 d PDU B 1 
HB1_190 H 0.6360 0.4278 0.3633 0.057 Uiso 0.59 1 calc PR B 1 
HB2_190 H 0.6207 0.4104 0.3484 0.057 Uiso 0.59 1 calc PR B 1 
CB_190 C 0.62260(15) 0.41142(16) 0.35204(13) 0.050 Uani 0.41 1 d PDU B 2 
HB3_190 H 0.6339 0.4285 0.3526 0.060 Uiso 0.41 1 calc PR B 2 
HB4_190 H 0.6196 0.4070 0.3400 0.060 Uiso 0.41 1 calc PR B 2 
CG_190 C 0.60287(11) 0.40228(12) 0.37109(7) 0.052 Uani 0.59 1 d PDU B 1 
HG1_190 H 0.5909 0.3866 0.3668 0.062 Uiso 0.59 1 calc PR B 1 
HG2_190 H 0.6067 0.4002 0.3828 0.062 Uiso 0.59 1 calc PR B 1 
CG_190 C 0.59967(16) 0.40651(18) 0.36026(11) 0.056 Uani 0.41 1 d PDU B 2 
HG3_190 H 0.5897 0.4081 0.3516 0.068 Uiso 0.41 1 calc PR B 2 
HG4_190 H 0.5913 0.3900 0.3642 0.068 Uiso 0.41 1 calc PR B 2 
CD_190 C 0.59221(15) 0.41756(16) 0.37148(9) 0.072 Uani 0.59 1 d PDU B 1 
CD_190 C 0.60218(18) 0.42216(17) 0.37488(11) 0.059 Uani 0.41 1 d PDU B 2 
OE1_190 O 0.60146(12) 0.43703(11) 0.36506(8) 0.079 Uani 0.59 1 d PDU B 1 
OE1_190 O 0.61288(18) 0.44357(13) 0.37273(10) 0.076 Uani 0.41 1 d PDU B 2 
NE2_190 N 0.57168(17) 0.40846(19) 0.37937(14) 0.127 Uani 0.59 1 d PDU B 1 
HE2A_190 H 0.5643 0.4165 0.3801 0.152 Uiso 0.59 1 calc PR B 1 
HE2B_190 H 0.5654 0.3944 0.3839 0.152 Uiso 0.59 1 calc PR B 1 
NE2_190 N 0.5924(2) 0.4120(2) 0.38933(11) 0.088 Uani 0.41 1 d PDU B 2 
HE2C_190 H 0.5933 0.4206 0.3981 0.105 Uiso 0.41 1 calc PR B 2 
HE2D_190 H 0.5849 0.3965 0.3902 0.105 Uiso 0.41 1 calc PR B 2 
C_190 C 0.61883(6) 0.37109(6) 0.35962(4) 0.046 Uani 1 1 d DU . . 
O_190 O 0.60735(5) 0.35872(5) 0.37163(3) 0.066 Uani 1 1 d DU B . 
N_191 N 0.61657(5) 0.36272(5) 0.34388(3) 0.041 Uani 1 1 d DU B . 
H0_191 H 0.6262 0.3718 0.3360 0.049 Uiso 1 1 calc R . . 
CA_191 C 0.59847(6) 0.33903(6) 0.33970(4) 0.045 Uani 1 1 d U . . 
HA_191 H 0.5879 0.3326 0.3497 0.053 Uiso 1 1 calc R B . 
CB_191 C 0.58346(7) 0.33961(7) 0.32512(4) 0.052 Uani 1 1 d U B . 
HB1_191 H 0.5936 0.3470 0.3152 0.062 Uiso 1 1 calc R . . 
HB2_191 H 0.5715 0.3233 0.3220 0.062 Uiso 1 1 calc R . . 
CG_191 C 0.57127(6) 0.35307(7) 0.32971(4) 0.052 Uani 1 1 d U . . 
CD1_191 C 0.57368(7) 0.37177(8) 0.31971(5) 0.059 Uani 1 1 d U B . 
HD1_191 H 0.5836 0.3761 0.3101 0.071 Uiso 1 1 calc R . . 
CE1_191 C 0.56224(8) 0.38404(8) 0.32335(6) 0.069 Uani 1 1 d U . . 
HE1_191 H 0.5640 0.3965 0.3162 0.082 Uiso 1 1 calc R B . 
CD2_191 C 0.55724(7) 0.34771(8) 0.34385(5) 0.057 Uani 1 1 d U B . 
HD2_191 H 0.5554 0.3353 0.3509 0.069 Uiso 1 1 calc R . . 
CE2_191 C 0.54582(8) 0.35979(9) 0.34802(6) 0.067 Uani 1 1 d U . . 
HE2_191 H 0.5365 0.3558 0.3579 0.080 Uiso 1 1 calc R B . 
CZ_191 C 0.54798(8) 0.37787(9) 0.33769(6) 0.069 Uani 1 1 d U B . 
OH_191 O 0.53632(7) 0.38980(7) 0.34092(5) 0.089 Uani 1 1 d U . . 
HH_191 H 0.5285 0.3846 0.3498 0.134 Uiso 1 1 calc R B . 
C_191 C 0.60816(6) 0.32265(6) 0.33611(4) 0.045 Uani 1 1 d U B . 
O_191 O 0.59499(5) 0.30244(5) 0.33122(3) 0.055 Uani 1 1 d U . . 
N_192 N 0.63104(5) 0.33062(5) 0.33916(3) 0.042 Uani 1 1 d U . . 
H0_192 H 0.6401 0.3451 0.3427 0.050 Uiso 1 1 calc R B . 
CA_192 C 0.64095(7) 0.31547(7) 0.33668(4) 0.047 Uani 1 1 d U B . 
HA1_192 H 0.6317 0.3009 0.3433 0.057 Uiso 1 1 calc R . . 
HA2_192 H 0.6572 0.3235 0.3412 0.057 Uiso 1 1 calc R . . 
C_192 C 0.64154(6) 0.30884(6) 0.31855(4) 0.043 Uani 1 1 d U . . 
O_192 O 0.63922(5) 0.28945(5) 0.31509(3) 0.056 Uani 1 1 d U B . 
N_193 N 0.64481(5) 0.32471(5) 0.30697(3) 0.041 Uani 1 1 d U B . 
H0_193 H 0.6483 0.3389 0.3102 0.049 Uiso 1 1 calc R . . 
CA_193 C 0.64273(6) 0.31944(6) 0.28894(3) 0.040 Uani 1 1 d U . . 
HA_193 H 0.6324 0.3021 0.2872 0.048 Uiso 1 1 calc R B . 
CB_193 C 0.63193(6) 0.33264(6) 0.28021(3) 0.043 Uani 1 1 d U B . 
HB1_193 H 0.6434 0.3497 0.2806 0.051 Uiso 1 1 calc R . . 
HB2_193 H 0.6293 0.3280 0.2682 0.051 Uiso 1 1 calc R . . 
CG_193 C 0.60878(7) 0.32841(7) 0.28776(4) 0.048 Uani 1 1 d U . . 
HG_193 H 0.6115 0.3323 0.3000 0.057 Uiso 1 1 calc R B . 
CD1_193 C 0.60163(8) 0.34510(7) 0.27982(4) 0.054 Uani 1 1 d U B . 
HD1A_193 H 0.6139 0.3614 0.2819 0.081 Uiso 1 1 calc R . . 
HD1B_193 H 0.5868 0.3423 0.2848 0.081 Uiso 1 1 calc R . . 
HD1C_193 H 0.5996 0.3423 0.2677 0.081 Uiso 1 1 calc R . . 
CD2_193 C 0.58961(7) 0.30315(8) 0.28629(5) 0.062 Uani 1 1 d U B . 
HD2A_193 H 0.5752 0.3012 0.2915 0.093 Uiso 1 1 calc R . . 
HD2B_193 H 0.5945 0.2931 0.2921 0.093 Uiso 1 1 calc R . . 
HD2C_193 H 0.5867 0.2987 0.2744 0.093 Uiso 1 1 calc R . . 
C_193 C 0.66690(6) 0.32761(6) 0.28114(4) 0.043 Uani 1 1 d U B . 
O_193 O 0.68418(4) 0.34563(5) 0.28590(3) 0.054 Uani 1 1 d U . . 
N_194 N 0.66668(5) 0.31390(5) 0.26850(3) 0.046 Uani 1 1 d U . . 
H0_194 H 0.6536 0.3006 0.2664 0.055 Uiso 1 1 calc R B . 
CA_194 C 0.68720(6) 0.32007(7) 0.25809(4) 0.050 Uani 1 1 d DU B . 
HA_194 H 0.7009 0.3346 0.2627 0.059 Uiso 1 1 calc R . . 
CB_194 C 0.69322(8) 0.30063(9) 0.25796(5) 0.063 Uani 1 1 d U . . 
HB1_194 H 0.6788 0.2854 0.2558 0.076 Uiso 1 1 calc R B . 
HB2_194 H 0.7045 0.3035 0.2488 0.076 Uiso 1 1 calc R . . 
OG_194 O 0.70321(7) 0.29980(9) 0.27371(4) 0.095 Uani 1 1 d U B . 
HG_194 H 0.6924 0.2916 0.2805 0.142 Uiso 1 1 calc R . . 
C_194 C 0.68246(6) 0.32509(6) 0.24023(4) 0.045 Uani 1 1 d DU . . 
O_194 O 0.66377(4) 0.31143(5) 0.23291(3) 0.054 Uani 1 1 d DU B . 
N_195 N 0.69959(12) 0.34430(13) 0.23360(7) 0.052 Uani 0.74 1 d PDU B 1 
H0_195 H 0.7125 0.3528 0.2395 0.062 Uiso 0.74 1 calc PR B 1 
N_195 N 0.6986(3) 0.3448(3) 0.2322(2) 0.049 Uani 0.26 1 d PDU B 2 
H0A_195 H 0.7108 0.3556 0.2378 0.058 Uiso 0.26 1 calc PR B 2 
CA_195 C 0.69780(11) 0.35191(10) 0.21659(7) 0.049 Uani 0.74 1 d PDU B 1 
HA_195 H 0.6822 0.3509 0.2151 0.058 Uiso 0.74 1 calc PR B 1 
CA_195 C 0.6962(3) 0.3483(3) 0.21455(18) 0.061 Uani 0.26 1 d PDU B 2 
HA1_195 H 0.6804 0.3466 0.2126 0.073 Uiso 0.26 1 calc PR B 2 
CB_195 C 0.71754(8) 0.37757(9) 0.21516(5) 0.045 Uani 0.74 1 d PDU B 1 
HB1_195 H 0.7164 0.3865 0.2248 0.054 Uiso 0.74 1 calc PR B 1 
HB2_195 H 0.7328 0.3781 0.2160 0.054 Uiso 0.74 1 calc PR B 1 
CB_195 C 0.7150(3) 0.3712(2) 0.20611(19) 0.059 Uani 0.26 1 d PDU B 2 
HB3_195 H 0.7308 0.3738 0.2092 0.071 Uiso 0.26 1 calc PR B 2 
HB4_195 H 0.7134 0.3692 0.1937 0.071 Uiso 0.26 1 calc PR B 2 
CG_195 C 0.71718(7) 0.38987(8) 0.19887(5) 0.040 Uani 0.74 1 d PDU B 1 
HG_195 H 0.7169 0.3801 0.1891 0.048 Uiso 0.74 1 calc PR B 1 
CG_195 C 0.7139(2) 0.3927(2) 0.21077(14) 0.053 Uani 0.26 1 d PDU B 2 
HG1_195 H 0.7132 0.3934 0.2233 0.064 Uiso 0.26 1 calc PR B 2 
CD1_195 C 0.69582(9) 0.39296(9) 0.19779(6) 0.047 Uani 0.74 1 d PDU B 1 
CD1_195 C 0.7364(2) 0.4148(3) 0.2047(2) 0.063 Uani 0.26 1 d PDU B 2 
CD2_195 C 0.73991(9) 0.41365(8) 0.19808(6) 0.047 Uani 0.74 1 d PDU B 1 
CD2_195 C 0.6919(2) 0.3915(3) 0.2035(2) 0.063 Uani 0.26 1 d PDU B 2 
C_195 C 0.70040(11) 0.33639(10) 0.20383(7) 0.054 Uani 0.74 1 d PDU B 1 
C_195 C 0.6986(2) 0.3304(2) 0.20380(14) 0.054 Uani 0.26 1 d PDU B 2 
O_195 O 0.71666(8) 0.33219(9) 0.20511(5) 0.070 Uani 0.74 1 d PDU B 1 
O_195 O 0.7112(3) 0.3223(3) 0.20601(16) 0.093 Uani 0.26 1 d PDU B 2 
N_196 N 0.68497(6) 0.32724(7) 0.19076(3) 0.057 Uani 1 1 d DU . . 
H0_196 H 0.6729 0.3296 0.1906 0.068 Uiso 1 1 calc R B 1 
CA_196 C 0.68719(8) 0.31382(8) 0.17694(4) 0.062 Uani 1 1 d DU B . 
HA_196 H 0.6926 0.3031 0.1815 0.074 Uiso 1 1 calc R . . 
CB_196 C 0.66368(8) 0.29929(8) 0.16824(5) 0.065 Uani 1 1 d U . . 
HB_196 H 0.6580 0.3101 0.1644 0.078 Uiso 1 1 calc R B . 
CG1_196 C 0.66565(12) 0.28647(12) 0.15290(6) 0.096 Uani 1 1 d U B . 
HG1A_196 H 0.6762 0.2980 0.1446 0.144 Uiso 1 1 calc R . . 
HG1B_196 H 0.6501 0.2768 0.1479 0.144 Uiso 1 1 calc R . . 
HG1C_196 H 0.6720 0.2764 0.1563 0.144 Uiso 1 1 calc R . . 
CG2_196 C 0.64585(10) 0.28166(9) 0.18067(6) 0.073 Uani 1 1 d U B . 
HG2A_196 H 0.6433 0.2901 0.1898 0.109 Uiso 1 1 calc R . . 
HG2B_196 H 0.6519 0.2719 0.1853 0.109 Uiso 1 1 calc R . . 
HG2C_196 H 0.6310 0.2716 0.1749 0.109 Uiso 1 1 calc R . . 
C_196 C 0.70588(7) 0.33161(8) 0.16495(4) 0.056 Uani 1 1 d U . . 
O_196 O 0.70392(5) 0.34754(5) 0.15851(3) 0.058 Uani 1 1 d U B . 
N_197 N 0.72430(7) 0.32859(8) 0.16190(4) 0.068 Uani 1 1 d U B . 
H0_197 H 0.7242 0.3160 0.1659 0.081 Uiso 1 1 calc R . . 
CA_197 C 0.74453(8) 0.34566(9) 0.15211(5) 0.064 Uani 1 1 d U . . 
HA_197 H 0.7405 0.3571 0.1470 0.077 Uiso 1 1 calc R B . 
CB_197 C 0.76667(10) 0.35944(13) 0.16302(6) 0.091 Uani 1 1 d U B . 
HB_197 H 0.7791 0.3717 0.1557 0.110 Uiso 1 1 calc R . . 
OG1_197 O 0.77480(11) 0.34435(14) 0.16817(6) 0.142 Uani 1 1 d U . . 
HG1_197 H 0.7807 0.3412 0.1599 0.213 Uiso 1 1 calc R B . 
CG2_197 C 0.76309(11) 0.37199(14) 0.17751(6) 0.101 Uani 1 1 d U . . 
HG2A_197 H 0.7782 0.3822 0.1830 0.151 Uiso 1 1 calc R B . 
HG2B_197 H 0.7522 0.3604 0.1856 0.151 Uiso 1 1 calc R . . 
HG2C_197 H 0.7565 0.3815 0.1734 0.151 Uiso 1 1 calc R . . 
C_197 C 0.74968(8) 0.33345(9) 0.13789(5) 0.068 Uani 1 1 d U B . 
O_197 O 0.74174(8) 0.31211(7) 0.13769(5) 0.100 Uani 1 1 d U . . 
N_198 N 0.76319(7) 0.34767(7) 0.12592(4) 0.063 Uani 1 1 d U . . 
H0_198 H 0.7678 0.3627 0.1268 0.075 Uiso 1 1 calc R B . 
CA_198 C 0.77079(9) 0.33988(9) 0.11143(6) 0.068 Uani 1 1 d U B . 
HA1_198 H 0.7600 0.3373 0.1019 0.082 Uiso 1 1 calc R . . 
HA2_198 H 0.7697 0.3246 0.1141 0.082 Uiso 1 1 calc R . . 
C_198 C 0.79602(8) 0.35739(9) 0.10602(5) 0.067 Uani 1 1 d U . . 
OT1_198 O 0.80197(6) 0.35390(8) 0.09170(4) 0.088 Uani 1 1 d U B . 
OT2_198 O 0.80877(7) 0.37286(9) 0.11570(5) 0.098 Uani 1 1 d U B . 
S_200 S 0.69948(7) 0.25033(7) 0.05041(4) 0.071 Uani 0.31 1 d PDU . . 
O1_200 O 0.6822(2) 0.22529(16) 0.05212(12) 0.076 Uani 0.31 1 d PDU . . 
O2_200 O 0.7215(2) 0.2553(3) 0.05848(14) 0.103 Uani 0.31 1 d PDU . . 
O3_200 O 0.70401(16) 0.25697(16) 0.03278(9) 0.065 Uani 0.31 1 d PDU . . 
O4_200 O 0.69100(19) 0.26495(16) 0.05903(10) 0.068 Uani 0.31 1 d PDU . . 
S_201 S 0.76668(2) 0.53875(3) 0.359513(15) 0.059 Uani 0.76 1 d PDU . . 
O1_201 O 0.77662(8) 0.54182(9) 0.37689(4) 0.076 Uani 0.76 1 d PDU . . 
O2_201 O 0.75637(8) 0.55380(9) 0.35761(5) 0.075 Uani 0.76 1 d PDU . . 
O3_201 O 0.78455(9) 0.54493(9) 0.34669(5) 0.082 Uani 0.76 1 d PDU . . 
O4_201 O 0.74759(9) 0.51393(9) 0.35835(8) 0.099 Uani 0.76 1 d PDU . . 
S_202 S 0.46888(4) 0.53922(4) 0.17474(2) 0.087 Uani 0.76 1 d PDU Q 1 
S_202 S 0.47012(12) 0.54462(12) 0.17886(7) 0.039 Uani 0.13 1 d PDU R 2 
O1_202 O 0.48903(7) 0.54141(9) 0.16569(5) 0.073 Uani 0.76 1 d PDU Q 1 
O1_202 O 0.4737(3) 0.5672(3) 0.17166(16) 0.042 Uani 0.13 1 d PDU R 2 
O2_202 O 0.46494(8) 0.52451(10) 0.18985(5) 0.086 Uani 0.76 1 d PDU Q 1 
O2_202 O 0.4803(4) 0.5487(4) 0.19493(16) 0.057 Uani 0.13 1 d PDU R 2 
O3_202 O 0.44842(9) 0.52746(15) 0.16444(8) 0.127 Uani 0.76 1 d PDU Q 1 
O3_202 O 0.4805(4) 0.5351(5) 0.1673(2) 0.067 Uani 0.13 1 d PDU R 2 
O4_202 O 0.4748(2) 0.56320(14) 0.18043(17) 0.206 Uani 0.76 1 d PDU Q 1 
O4_202 O 0.4448(2) 0.5274(3) 0.1776(3) 0.058 Uani 0.13 1 d PDU R 2 
S_203 S 0.40659(13) 0.40947(14) 0.37239(8) 0.122 Uani 0.28 1 d PDU S 1 
S_203 S 0.37915(12) 0.36387(15) 0.35424(7) 0.123 Uani 0.29 1 d PDU T 2 
O1_203 O 0.4144(4) 0.3964(4) 0.3606(2) 0.137 Uani 0.28 1 d PDU S 1 
O1_203 O 0.3897(2) 0.3612(2) 0.33885(13) 0.082 Uani 0.29 1 d PDU T 2 
O2_203 O 0.3909(4) 0.3927(4) 0.3842(2) 0.165 Uani 0.28 1 d PDU S 1 
O2_203 O 0.3542(3) 0.3455(6) 0.3545(3) 0.323 Uani 0.29 1 d PDU T 2 
O3_203 O 0.3956(4) 0.4195(4) 0.3624(2) 0.151 Uani 0.28 1 d PDU S 1 
O3_203 O 0.3776(6) 0.3850(5) 0.3551(2) 0.226 Uani 0.29 1 d PDU T 2 
O4_203 O 0.4273(3) 0.4274(3) 0.3805(2) 0.147 Uani 0.28 1 d PDU S 1 
O4_203 O 0.3913(6) 0.3612(7) 0.3686(2) 0.238 Uani 0.29 1 d PDU T 2 
S_204 S 0.54683(10) 0.64639(11) 0.41065(6) 0.095 Uani 0.27 1 d PDU . . 
O1_204 O 0.5338(3) 0.6465(4) 0.39656(14) 0.129 Uani 0.27 1 d PDU . . 
O2_204 O 0.5670(4) 0.6702(3) 0.4136(2) 0.174 Uani 0.27 1 d PDU . . 
O3_204 O 0.5316(3) 0.6396(3) 0.42567(15) 0.112 Uani 0.27 1 d PDU . . 
O4_204 O 0.5569(3) 0.6308(3) 0.40856(17) 0.111 Uani 0.27 1 d PDU . . 
S_205 S 0.67322(19) 0.7501(3) 0.38494(18) 0.239 Uani 0.29 1 d PDU . . 
O1_205 O 0.6809(4) 0.7341(5) 0.3794(2) 0.231 Uani 0.29 1 d PDU . . 
O2_205 O 0.6877(4) 0.7634(6) 0.3989(3) 0.276 Uani 0.29 1 d PDU . . 
O3_205 O 0.6771(5) 0.7655(5) 0.3700(3) 0.258 Uani 0.29 1 d PDU . . 
O4_205 O 0.6481(3) 0.7375(7) 0.3895(5) 0.297 Uani 0.29 1 d PDU . . 
S_206 S 0.5266(2) 0.80618(19) 0.0949(2) 0.186 Uani 0.28 1 d PDU U 1 
S_206 S 0.5328(4) 0.8107(3) 0.0884(3) 0.178 Uani 0.14 1 d PDU V 2 
O1_206 O 0.5075(4) 0.8109(5) 0.0991(6) 0.287 Uani 0.28 1 d PDU U 1 
O1_206 O 0.5140(7) 0.8088(7) 0.0773(7) 0.219 Uani 0.14 1 d PDU V 2 
O2_206 O 0.5487(4) 0.8282(4) 0.0933(5) 0.248 Uani 0.28 1 d PDU U 1 
O2_206 O 0.5558(5) 0.8279(7) 0.0815(5) 0.210 Uani 0.14 1 d PDU V 2 
O3_206 O 0.5198(6) 0.7938(7) 0.0785(3) 0.285 Uani 0.28 1 d PDU U 1 
O3_206 O 0.5311(5) 0.7880(4) 0.0903(4) 0.100 Uani 0.14 1 d PDU V 2 
O4_206 O 0.5284(4) 0.7905(3) 0.1068(3) 0.147 Uani 0.28 1 d PDU U 1 
O4_206 O 0.5310(9) 0.8199(8) 0.1048(5) 0.238 Uani 0.14 1 d PDU V 2 
S_207 S 0.23060(10) 0.20999(13) 0.20394(10) 0.133 Uani 0.30 1 d PDU . . 
O1_207 O 0.2100(3) 0.2120(5) 0.2059(5) 0.235 Uani 0.30 1 d PDU . . 
O2_207 O 0.2477(3) 0.2288(3) 0.1932(2) 0.137 Uani 0.30 1 d PDU . . 
O3_207 O 0.2244(6) 0.1876(3) 0.1960(4) 0.278 Uani 0.30 1 d PDU . . 
O4_207 O 0.2404(3) 0.2112(6) 0.2206(2) 0.190 Uani 0.30 1 d PDU . . 
S_208 S 0.9185(2) 0.7253(3) 0.27629(11) 0.285 Uani 0.48 1 d PDU . . 
O1_208 O 0.9414(3) 0.7282(5) 0.2783(3) 0.395 Uani 0.48 1 d PDU . . 
O2_208 O 0.9136(5) 0.7383(4) 0.28907(18) 0.423 Uani 0.48 1 d PDU . . 
O3_208 O 0.9141(3) 0.7331(4) 0.26114(11) 0.225 Uani 0.48 1 d PDU . . 
O4_208 O 0.9008(3) 0.6994(3) 0.2794(3) 0.273 Uani 0.48 1 d PDU . . 
S_209 S 0.3968(5) 0.4806(5) 0.0202(2) 0.239 Uani 0.19 1 d PDU W 1 
S_209 S 0.4073(6) 0.5197(7) 0.0271(4) 0.457 Uani 0.23 1 d PDU X 2 
O1_209 O 0.4216(6) 0.4917(9) 0.0248(5) 0.259 Uani 0.19 1 d PDU W 1 
O1_209 O 0.4229(9) 0.5350(10) 0.0405(6) 0.340 Uani 0.23 1 d PDU X 2 
O2_209 O 0.3868(11) 0.4563(6) 0.0150(6) 0.303 Uani 0.19 1 d PDU W 1 
O2_209 O 0.4202(9) 0.5136(8) 0.0151(4) 0.300 Uani 0.23 1 d PDU X 2 
O3_209 O 0.3956(8) 0.4935(8) 0.0054(3) 0.192 Uani 0.19 1 d PDU W 1 
O3_209 O 0.3967(12) 0.5315(11) 0.0183(5) 0.366 Uani 0.23 1 d PDU X 2 
O4_209 O 0.3838(9) 0.4826(8) 0.0346(4) 0.251 Uani 0.19 1 d PDU W 1 
O4_209 O 0.3896(6) 0.4976(7) 0.0351(6) 0.300 Uani 0.23 1 d PDU X 2 
CX1_210 C 0.51109(11) 0.58200(12) 0.23653(8) 0.065 Uani 0.70 1 d PDU Y 1 
OX1_210 O 0.52487(9) 0.59314(11) 0.22236(6) 0.086 Uani 0.70 1 d PDU Y 1 
CX2_210 C 0.49111(12) 0.58683(14) 0.23667(8) 0.073 Uani 0.70 1 d PDU Y 1 
OX2_210 O 0.47787(10) 0.57868(17) 0.22166(6) 0.124 Uani 0.70 1 d PDU Y 1 
CX3_210 C 0.47478(12) 0.57411(13) 0.25114(8) 0.069 Uani 0.70 1 d PDU Y 1 
OX3_210 O 0.45666(10) 0.57969(11) 0.25193(7) 0.093 Uani 0.70 1 d PDU Y 1 
S_211 S 0.62027(19) 0.82399(17) 0.17633(14) 0.134 Uani 0.23 1 d PDU . . 
O1_211 O 0.6396(5) 0.8353(6) 0.1631(3) 0.191 Uani 0.23 1 d PDU . . 
O2_211 O 0.6312(5) 0.8147(4) 0.1872(3) 0.154 Uani 0.23 1 d PDU . . 
O3_211 O 0.6165(6) 0.8414(4) 0.1833(4) 0.175 Uani 0.23 1 d PDU . . 
O4_211 O 0.5993(4) 0.8062(6) 0.1678(4) 0.207 Uani 0.23 1 d PDU . . 
CX1_212 C 0.7913(3) 0.4524(3) 0.02395(13) 0.121 Uani 0.57 1 d PDU . . 
OX1_212 O 0.79052(8) 0.46052(10) 0.04025(6) 0.067 Uani 0.57 1 d PDU . . 
CX2_212 C 0.7994(4) 0.4376(3) 0.02086(12) 0.142 Uani 0.57 1 d PDU . . 
OX2_212 O 0.80281(10) 0.42756(10) 0.03507(6) 0.068 Uani 0.57 1 d PDU . . 
CX3_212 C 0.8007(2) 0.4274(2) 0.00449(11) 0.097 Uani 0.57 1 d PDU . . 
OX3_212 O 0.8242(3) 0.4443(4) 0.0003(3) 0.316 Uani 0.57 1 d PDU . . 
O_300 O 0.4199 0.2753 0.0338 0.169 Uani 0.70 1 d PU . . 
O_300 O 0.4342 0.2731 0.0229 0.221 Uani 0.30 1 d PU Z 2 
O_301 O 0.4633 0.3066 0.0464 0.128 Uani 1 1 d U . . 
O_302 O 0.4491 0.3337 0.0627 0.095 Uani 1 1 d U . . 
O_303 O 0.2923 0.2854 0.1129 0.114 Uani 0.80 1 d PU . . 
O_304 O 0.2353 0.2300 0.0997 0.429 Uani 1 1 d U . . 
O_305 O 0.2035 0.1877 0.1223 0.425 Uani 1 1 d U . . 
O_306 O 0.3216 0.1136 0.1546 0.174 Uani 1 1 d U . . 
O_307 O 0.3532 0.0979 0.1493 0.154 Uani 1 1 d U . . 
O_308 O 0.3812 0.0626 0.1734 0.282 Uani 1 1 d U . . 
O_309 O 0.4741 0.1445 0.2235 0.099 Uani 1 1 d U . . 
O_310 O 0.5560 0.1770 0.1407 0.080 Uani 0.80 1 d PU A 1 
O_310 O 0.5677 0.1652 0.1320 0.154 Uani 0.20 1 d PU B 2 
O_313 O 0.7230 0.3786 0.0380 0.077 Uani 1 1 d U . . 
O_314 O 0.7480 0.5771 -0.0099 0.193 Uani 0.70 1 d PU C 1 
O_314 O 0.7679 0.5604 -0.0236 0.141 Uani 0.30 1 d PU D 2 
O_315 O 0.6759 0.5457 -0.0144 0.094 Uani 1 1 d U . . 
O_316 O 0.4882 0.5041 0.0168 0.235 Uani 0.60 1 d PU E 1 
O_316 O 0.4672 0.4899 0.0225 0.225 Uani 0.40 1 d PU F 2 
O_317 O 0.6128 0.4923 0.0143 0.094 Uani 1 1 d U . . 
O_318 O 0.6001 0.4889 0.0472 0.076 Uani 1 1 d U . . 
O_319 O 0.5549 0.4508 0.0493 0.118 Uani 1 1 d U . . 
O_320 O 0.5583 0.3323 0.0206 0.113 Uani 0.50 1 d PU G 1 
O_320 O 0.5467 0.3281 0.0107 0.265 Uani 0.50 1 d PU H 2 
O_321 O 0.5751 0.3722 -0.0218 0.140 Uani 1 1 d U . . 
O_322 O 0.6087 0.4026 0.0013 0.076 Uani 1 1 d U . . 
O_323 O 0.6238 0.3553 -0.0509 0.065 Uani 1 1 d U . . 
O_324 O 0.7182 0.6939 0.0614 0.105 Uani 0.80 1 d PU I 1 
O_324 O 0.7067 0.6942 0.0568 0.078 Uani 0.20 1 d PU J 2 
O_325 O 0.7754 0.7452 0.0722 0.282 Uani 1 1 d U . . 
O_326 O 0.8166 0.7718 0.0826 0.151 Uani 0.50 1 d PU . . 
O_327 O 0.8879 0.8371 0.2038 0.334 Uani 1 1 d U . . 
O_328 O 0.8569 0.7853 0.2837 0.236 Uani 1 1 d U . . 
O_329 O 0.8018 0.7875 0.3057 0.283 Uani 1 1 d U . . 
O_330 O 0.7225 0.7736 0.3200 0.173 Uani 1 1 d U . . 
O_331 O 0.7129 0.7033 0.3489 0.099 Uani 1 1 d U . . 
O_332 O 0.7187 0.7074 0.3832 0.331 Uani 1 1 d U . . 
O_333 O 0.7252 0.6635 0.3762 0.137 Uani 0.50 1 d PU . . 
O_334 O 0.6854 0.5462 0.3597 0.193 Uani 1 1 d U . . 
O_335 O 0.7171 0.5394 0.3771 0.063 Uani 0.75 1 d PU K 1 
O_335 O 0.7256 0.5424 0.3746 0.148 Uani 0.25 1 d PU L 2 
O_336 O 0.4957 0.4923 0.3848 0.128 Uani 1 1 d U . . 
O_337 O 0.4763 0.5171 0.3999 0.207 Uani 1 1 d U . . 
O_338 O 0.4296 0.5036 0.3878 0.324 Uani 1 1 d U . . 
O_339 O 0.4741 0.6286 0.2544 0.108 Uani 1 1 d U . . 
O_340 O 0.5178 0.6727 0.2465 0.298 Uani 0.50 1 d PU . . 
O_341 O 0.6046 0.5351 0.1289 0.051 Uani 1 1 d U . . 
O_342 O 0.7709 0.5416 0.2662 0.081 Uani 1 1 d U . . 
O_343 O 0.7863 0.5284 0.2381 0.106 Uani 1 1 d U . . 
O_344 O 0.7951 0.6292 0.2525 0.068 Uani 1 1 d U . . 
O_345 O 0.8181 0.6331 0.2233 0.101 Uani 1 1 d U . . 
O_346 O 0.8281 0.6426 0.3080 0.116 Uani 0.75 1 d PU . . 
O_347 O 0.7995 0.6613 0.3161 0.159 Uani 1 1 d U . . 
O_348 O 0.7672 0.6592 0.2930 0.060 Uani 1 1 d U . . 
O_349 O 0.6978 0.5845 0.2993 0.067 Uani 1 1 d U . . 
O_350 O 0.6487 0.5729 0.3317 0.079 Uani 1 1 d U . . 
O_351 O 0.5713 0.7009 0.3942 0.188 Uani 1 1 d U . . 
O_352 O 0.5735 0.7317 0.4178 0.128 Uani 1 1 d U . . 
O_353 O 0.5497 0.7391 0.3672 0.108 Uani 1 1 d U . . 
O_354 O 0.4896 0.6909 0.2879 0.114 Uani 1 1 d U . . 
O_355 O 0.5868 0.8183 0.0849 0.168 Uani 0.50 1 d PU M 1 
O_355 O 0.5922 0.8201 0.0610 0.293 Uani 0.50 1 d PU N 2 
O_356 O 0.5747 0.7768 0.0601 0.226 Uani 1 1 d U . . 
O_357 O 0.5279 0.7578 0.0657 0.168 Uani 1 1 d U . . 
O_358 O 0.4517 0.7415 0.0551 0.321 Uani 1 1 d U . . 
O_359 O 0.6317 0.2229 0.1660 0.323 Uani 1 1 d U . . 
O_360 O 0.4905 0.7560 -0.0039 0.171 Uani 1 1 d U . . 
O_361 O 0.6117 0.7809 -0.0083 0.408 Uani 1 1 d U . . 
O_362 O 0.6847 0.7921 0.0191 0.206 Uani 1 1 d U . . 
O_363 O 0.7015 0.8364 0.0288 0.292 Uani 1 1 d U . . 
O_364 O 0.7736 0.8264 0.0459 0.185 Uani 0.50 1 d PU O 1 
O_364 O 0.7831 0.8353 0.0378 0.334 Uani 0.50 1 d PU P 2 
O_365 O 0.7727 0.7868 0.1744 0.189 Uani 1 1 d U . . 
O_366 O 0.9412 0.8087 0.1384 0.319 Uani 1 1 d U . . 
O_367 O 0.9757 0.7795 0.1551 0.240 Uani 1 1 d U . . 
O_368 O 0.9660 0.7815 0.2342 0.209 Uani 1 1 d U . . 
O_369 O 0.9726 0.6767 0.2368 0.236 Uani 1 1 d U . . 
O_370 O 0.9181 0.5408 0.1858 0.065 Uani 1 1 d U . . 
O_371 O 0.8781 0.4786 0.2028 0.131 Uani 1 1 d U . . 
O_372 O 0.7784 0.4093 0.2319 0.108 Uani 1 1 d U . . 
O_373 O 0.7438 0.3714 0.2502 0.071 Uani 1 1 d U . . 
O_374 O 0.7606 0.4222 0.2937 0.089 Uani 1 1 d U . . 
O_375 O 0.7517 0.4431 0.3192 0.116 Uani 1 1 d U . . 
O_377 O 0.7928 0.4592 0.2747 0.131 Uani 0.70 1 d PU . . 
O_378 O 0.8731 0.5573 0.2686 0.097 Uani 0.90 1 d PU Q 1 
O_378 O 0.8890 0.5529 0.2755 0.073 Uani 0.10 1 d PU R 2 
O_379 O 0.8480 0.7163 0.0734 0.202 Uani 0.50 1 d PU S 1 
O_379 O 0.8373 0.6986 0.0702 0.140 Uani 0.50 1 d PU T 2 
O_380 O 0.7585 0.7610 0.0437 0.155 Uani 0.40 1 d PU U 1 
O_380 O 0.7632 0.7776 0.0398 0.254 Uani 0.30 1 d PU V 2 
O_381 O 0.5896 0.7159 0.0170 0.217 Uani 1 1 d U . . 
O_382 O 0.5875 0.7442 0.0684 0.092 Uani 1 1 d U . . 
O_383 O 0.4477 0.5788 -0.0036 0.108 Uani 0.50 1 d PU W 1 
O_383 O 0.4319 0.5692 0.0003 0.236 Uani 0.50 1 d PU X 2 
O_384 O 0.3943 0.4533 0.2252 0.123 Uani 1 1 d U . . 
O_385 O 0.3633 0.4051 0.2245 0.100 Uani 1 1 d U . . 
O_387 O 0.3349 0.3539 0.2608 0.091 Uani 0.50 1 d PU . . 
O_389 O 0.3019 0.4169 0.1837 0.046 Uani 0.50 1 d PU Y 1 
O_389 O 0.3029 0.4161 0.1874 0.153 Uani 0.50 1 d PU Z 2 
O_390 O 0.2325 0.3079 0.2110 0.132 Uani 1 1 d U . . 
O_391 O 0.3267 0.2974 0.3449 0.318 Uani 1 1 d U . . 
O_392 O 0.4613 0.3480 0.3637 0.100 Uani 1 1 d U . . 
O_393 O 0.5101 0.3732 0.3702 0.110 Uani 1 1 d U . . 
O_394 O 0.5093 0.3366 0.3886 0.160 Uani 0.50 1 d PU . . 
O_395 O 0.4969 0.2972 0.3721 0.275 Uani 1 1 d U . . 
O_396 O 0.5142 0.2854 0.3444 0.101 Uani 1 1 d U . . 
O_397 O 0.4783 0.4122 0.3825 0.165 Uani 1 1 d U . . 
O_398 O 0.4715 0.4483 0.3704 0.103 Uani 1 1 d U . . 
O_399 O 0.2973 0.3613 0.1105 0.150 Uani 1 1 d U . . 
O_400 O 0.2444 0.3461 0.0736 0.212 Uani 1 1 d U . . 
O_401 O 0.3620 0.3814 0.0492 0.230 Uani 0.50 1 d PU . . 
O_402 O 0.3112 0.2745 0.1619 0.068 Uani 1 1 d U . . 
O_403 O 0.3323 0.1499 0.2127 0.210 Uani 1 1 d U . . 
O_404 O 0.3103 0.1117 0.1900 0.228 Uani 1 1 d U . . 
O_405 O 0.3624 0.1472 0.1159 0.109 Uani 1 1 d U . . 
O_406 O 0.3813 0.1640 0.0847 0.127 Uani 1 1 d U . . 
O_407 O 0.3759 0.1969 0.0660 0.145 Uani 1 1 d U . . 
O_409 O 0.4812 0.2794 0.0559 0.132 Uani 1 1 d U . . 
O_410 O 0.4524 0.1117 0.0560 0.212 Uani 0.75 1 d PU A 1 
O_410 O 0.4712 0.1167 0.0572 0.099 Uani 0.25 1 d PU B 2 
O_411 O 0.5007 0.1602 0.0486 0.183 Uani 1 1 d U . . 
O_412 O 0.5264 0.1328 0.0571 0.180 Uani 1 1 d U . . 
O_413 O 0.6454 0.2398 0.2753 0.080 Uani 1 1 d U . . 
O_414 O 0.6684 0.2776 0.2972 0.084 Uani 1 1 d U . . 
O_415 O 0.6390 0.2594 0.3391 0.051 Uani 0.70 1 d PU . . 
O_416 O 0.5928 0.2331 0.3500 0.079 Uani 1 1 d U . . 
O_417 O 0.4178 0.2005 0.3123 0.259 Uani 1 1 d U . . 
O_418 O 0.6434 0.3704 0.1382 0.056 Uani 1 1 d U . . 
O_419 O 0.6712 0.3620 0.1598 0.050 Uani 1 1 d U . . 
O_420 O 0.7158 0.2908 0.2166 0.186 Uani 0.60 1 d PU . . 
O_421 O 0.7635 0.2473 0.0130 0.115 Uani 0.75 1 d PU . . 
O_424 O 0.5213 0.1337 0.0930 0.258 Uani 0.50 1 d PU C 1 
O_424 O 0.5084 0.1284 0.1026 0.232 Uani 0.50 1 d PU D 2 
O_425 O 0.6149 0.7391 0.3721 0.363 Uani 1 1 d U . . 
O_426 O 0.6568 0.7487 0.2349 0.193 Uani 0.50 1 d PU E 1 
O_426 O 0.6329 0.7268 0.2195 0.258 Uani 0.50 1 d PU F 2 
O_427 O 0.6626 0.7528 0.2687 0.301 Uani 1 1 d U . . 
O_428 O 0.6746 0.7757 0.3141 0.431 Uani 1 1 d U . . 
O_429 O 0.7277 0.2769 0.1144 0.164 Uani 0.50 1 d PU . . 
O_430 O 0.7669 0.7123 0.3984 0.325 Uani 1 1 d U . . 
O_431 O 0.3010 0.3462 0.2363 0.195 Uani 0.60 1 d PU G 1 
O_431 O 0.2831 0.3423 0.2477 0.250 Uani 0.40 1 d PU H 2 
O_433 O 0.8746 0.4601 0.1718 0.107 Uani 1 1 d U . . 
O_434 O 0.6855 0.7320 0.0223 0.141 Uani 0.50 1 d PU . . 
O_435 O 0.8638 0.4790 0.2536 0.139 Uani 0.50 1 d PU I 1 
O_435 O 0.8449 0.4761 0.2581 0.243 Uani 0.50 1 d PU J 2 
O_437 O 0.5172 0.5596 0.4028 0.219 Uani 1 1 d U . . 
O_444 O 0.7976 0.4811 0.3278 0.227 Uani 0.50 1 d PU K 1 
O_444 O 0.8205 0.4769 0.3257 0.458 Uani 0.50 1 d PU L 2 
O_445 O 0.3880 0.1662 0.2876 0.364 Uani 1 1 d U . . 
O_446 O 0.8357 0.8158 0.0694 0.551 Uani 1 1 d U . . 
O_447 O 0.6490 0.7731 -0.0105 0.275 Uani 0.50 1 d PU M 1 
O_447 O 0.6714 0.7893 -0.0111 0.259 Uani 0.50 1 d PU N 2 
O_449 O 0.9047 0.5206 0.2451 0.094 Uani 0.70 1 d PU O 1 
O_449 O 0.9008 0.5148 0.2623 0.109 Uani 0.30 1 d PU P 2 
O_450 O 0.4168 0.5327 0.3641 0.192 Uani 1 1 d U . . 
O_451 O 0.4134 0.2317 0.0454 0.149 Uani 0.75 1 d PU . . 
O_452 O 0.2699 0.1286 0.1222 0.242 Uani 1 1 d U . . 
O_454 O 0.7455 0.6621 0.0248 0.179 Uani 0.50 1 d PU Q 1 
O_454 O 0.7353 0.6737 0.0303 0.152 Uani 0.50 1 d PU R 2 
O_455 O 0.4815 0.4435 0.0276 0.221 Uani 1 1 d U . . 
O_457 O 0.2482 0.3686 0.0449 0.423 Uani 1 1 d U . . 
O_460 O 0.8779 0.8268 0.2523 0.371 Uani 1 1 d U . . 
O_461 O 0.4213 0.6638 0.1158 0.362 Uani 1 1 d U . . 
O_462 O 0.5517 0.5532 0.4146 0.412 Uani 1 1 d U . . 
O_464 O 0.2601 0.3153 0.0694 0.218 Uani 0.50 1 d PU S 1 
O_464 O 0.2670 0.2857 0.0702 0.381 Uani 0.50 1 d PU T 2 
O_465 O 0.5236 0.4913 0.4101 0.220 Uani 0.50 1 d PU . . 
O_466 O 0.2900 0.1842 0.2759 0.257 Uani 1 1 d U . . 
O_467 O 0.6734 0.2466 0.2215 0.156 Uani 0.60 1 d PU U 1 
O_467 O 0.6798 0.2695 0.2169 0.236 Uani 0.40 1 d PU V 2 
O_468 O 0.5215 0.3997 0.3994 0.239 Uani 0.50 1 d PU W 2 
O_471 O 0.7927 0.7151 0.0265 0.568 Uani 1 1 d U X 2 
O_475 O 0.4639 0.6102 0.2143 0.174 Uani 1 1 d U Y 2 
O_476 O 0.5876 0.1818 0.1667 0.271 Uani 1 1 d U Z 2 
O_477 O 0.2203 0.2760 0.2385 0.336 Uani 1 1 d U A 2 
O_478 O 0.2596 0.1034 0.1807 0.269 Uani 0.50 1 d PU B 2 
O_484 O 0.2431 0.1968 0.0936 0.542 Uani 1 1 d U C 2 
O_489 O 0.8290 0.6850 0.0232 0.476 Uani 1 1 d U D 2 
O_495 O 0.8114 0.8697 0.0760 0.175 Uani 0.80 1 d PU E 1 
O_495 O 0.8109 0.8775 0.0475 0.308 Uani 0.50 1 d PU F 2 
O_496 O 0.8451 0.8593 0.0919 0.459 Uani 1 1 d U . . 
O_499 O 0.7514 0.8463 0.1796 0.637 Uani 1 1 d U . . 
O_500 O 0.3182 0.1311 0.2687 0.328 Uani 0.50 1 d PU . . 
O_507 O 0.6179 0.1456 0.2819 0.278 Uani 0.50 1 d PU . . 
O_508 O 0.6366 0.2295 0.1301 0.463 Uani 1 1 d U . . 
O_515 O 0.5336 0.1866 0.3181 0.075 Uani 1 1 d U . . 
O_516 O 0.8419 0.4553 0.2252 0.078 Uani 0.50 1 d PU G 1 
O_516 O 0.8426 0.4530 0.2246 0.134 Uani 0.50 1 d PU H 2 
O_517 O 0.7927 0.2794 -0.0100 0.086 Uani 0.74 1 d PU . . 
O_519 O 0.2941 0.4118 0.1484 0.086 Uani 1 1 d U . . 
O_520 O 0.5131 0.6766 0.3408 0.063 Uani 0.70 1 d PU . . 
O_521 O 0.3413 0.5230 0.2559 0.086 Uani 0.70 1 d PU I 1 
O_521 O 0.3553 0.5322 0.2526 0.159 Uani 0.30 1 d PU J 2 
O_522 O 0.7541 0.3504 0.0490 0.064 Uani 0.80 1 d PU . . 
O_523 O 0.4173 0.4801 0.1672 0.065 Uani 0.50 1 d PU K 1 
O_523 O 0.4224 0.4818 0.1647 0.239 Uani 0.50 1 d PU L 2 
O_524 O 0.7544 0.4792 0.3479 0.083 Uani 0.70 1 d PU M 1 
O_524 O 0.7620 0.4755 0.3579 0.134 Uani 0.30 1 d PU N 2 
O_525 O 0.5279 0.5972 0.3842 0.143 Uani 1 1 d U . . 
O_529 O 0.5750 0.3757 0.0256 0.098 Uani 0.50 1 d PU O 1 
O_529 O 0.5687 0.3817 0.0216 0.159 Uani 0.50 1 d PU P 2 
O_530 O 0.4004 0.3103 0.0640 0.158 Uani 1 1 d U . . 
O_535 O 0.4776 0.3785 0.0470 0.076 Uani 0.50 1 d PU Q 1 
O_535 O 0.4866 0.3961 0.0467 0.178 Uani 0.50 1 d PU R 2 
O_539 O 0.5525 0.6993 0.3617 0.096 Uani 0.70 1 d PU . . 
O_542 O 0.3864 0.1800 0.2550 0.086 Uani 0.50 1 d PU . . 
O_543 O 0.6924 0.5849 0.3476 0.095 Uani 0.60 1 d PU S 1 
O_543 O 0.6835 0.5883 0.3564 0.200 Uani 0.40 1 d PU T 2 
O_549 O 0.4227 0.4696 0.3617 0.297 Uani 1 1 d U . . 
O_551 O 0.8450 0.6275 0.0955 0.230 Uani 1 1 d U . . 
O_553 O 0.5536 0.5536 0.0000 0.282 Uani 1 2 d SU . . 
O_554 O 0.4450 0.2973 0.3645 0.111 Uani 0.50 1 d PU U 1 
O_554 O 0.4362 0.3104 0.3823 0.280 Uani 0.50 1 d PU V 2 
O_555 O 0.8879 0.6477 0.1205 0.190 Uani 1 1 d U . . 
O_556 O 0.3058 0.2921 0.3023 0.148 Uani 0.60 1 d PU W 1 
O_556 O 0.2913 0.2683 0.3032 0.222 Uani 0.40 1 d PU X 2 
O_559 O 0.4267 0.5144 0.2599 0.149 Uani 0.70 1 d PU Y 1 
O_559 O 0.4429 0.5330 0.2546 0.250 Uani 0.30 1 d PU Z 2 
O_561 O 0.4027 0.1263 0.0961 0.196 Uani 0.80 1 d PU . . 
O_562 O 0.3837 0.4827 0.2462 0.210 Uani 0.70 1 d PU A 1 
O_562 O 0.4144 0.5197 0.2411 0.318 Uani 0.30 1 d PU B 2 
O_565 O 0.5391 0.6347 0.2060 0.223 Uani 0.80 1 d PU C 1 
O_565 O 0.5210 0.6341 0.1981 0.110 Uani 0.10 1 d PU D 2 
O_568 O 0.2850 0.3893 0.2209 0.211 Uani 0.60 1 d PU E 1 
O_568 O 0.2784 0.3925 0.2400 0.199 Uani 0.40 1 d PU F 2 
O_569 O 0.9335 0.7572 0.1140 0.293 Uani 1 1 d U . . 
O_571 O 0.4200 0.6515 0.0828 0.245 Uani 0.40 1 d PU G 1 
O_571 O 0.4151 0.6652 0.0700 0.102 Uani 0.60 1 d PU H 2 
O_577 O 0.3214 0.3771 0.2066 0.117 Uani 1 1 d U . . 
O_578 O 0.7729 0.3269 0.0667 0.127 Uani 1 1 d U . . 
O_580 O 0.6350 0.5405 -0.0014 0.147 Uani 0.70 1 d PU I 1 
O_580 O 0.6289 0.5427 -0.0074 0.258 Uani 0.30 1 d PU J 2 
O_584 O 0.3525 0.4009 0.2584 0.120 Uani 0.70 1 d PU . . 
O_589 O 0.5077 0.7405 0.2873 0.118 Uani 0.50 1 d PU . . 
O_591 O 0.7356 0.6080 0.3324 0.112 Uani 0.60 1 d PU K 1 
O_591 O 0.7216 0.5837 0.3290 0.068 Uani 0.40 1 d PU L 2 
O_595 O 0.7956 0.5841 0.0353 0.189 Uani 0.50 1 d PU M 1 
O_595 O 0.7934 0.5692 0.0445 0.155 Uani 0.50 1 d PU N 2 
O_598 O 0.8086 0.5267 0.3314 0.192 Uani 0.70 1 d PU O 1 
O_598 O 0.8223 0.5439 0.3402 0.231 Uani 0.30 1 d PU P 2 
O_600 O 0.3764 0.5396 0.2789 0.185 Uani 0.70 1 d PU Q 1 
O_600 O 0.3959 0.5598 0.2671 0.199 Uani 0.30 1 d PU R 2 
O_604 O 0.4832 0.1051 0.1222 0.324 Uani 1 1 d U . . 
O_605 O 0.5239 0.6018 0.1728 0.172 Uani 0.60 1 d PU S 1 
O_605 O 0.5068 0.5928 0.1905 0.235 Uani 0.40 1 d PU T 2 
O_608 O 0.6951 0.6168 0.3720 0.192 Uani 0.60 1 d PU . . 
O_611 O 0.8965 0.8108 0.1793 0.127 Uani 0.50 1 d PU . . 
O_613 O 0.7233 0.6220 0.0078 0.239 Uani 0.50 1 d PU U 1 
O_613 O 0.7088 0.6230 0.0037 0.187 Uani 0.50 1 d PU V 2 
O_616 O 0.5094 0.6516 0.2127 0.263 Uani 0.80 1 d PU W 1 
O_616 O 0.5131 0.6436 0.1934 0.103 Uani 0.10 1 d PU X 2 
O_621 O 0.6125 0.1747 0.2343 0.387 Uani 1 1 d U . . 
O_623 O 0.5002 0.6840 0.2017 0.375 Uani 1 1 d U . . 
O_624 O 0.3903 0.4351 0.2768 0.315 Uani 1 1 d U . . 
O_625 O 0.3904 0.4718 0.1949 0.061 Uani 0.50 1 d PU Y 1 
O_625 O 0.3714 0.4757 0.1990 0.187 Uani 0.50 1 d PU Z 2 
O_626 O 0.7448 0.4201 -0.0078 0.060 Uani 0.60 1 d PU A 1 
O_626 O 0.7284 0.4201 -0.0139 0.125 Uani 0.40 1 d PU B 2 
O_627 O 0.6004 0.7327 0.2749 0.145 Uani 0.60 1 d PU C 1 
O_627 O 0.6082 0.7614 0.2767 0.170 Uani 0.40 1 d PU D 2 
O_628 O 0.5683 0.7043 0.2512 0.274 Uani 0.40 1 d PU E 1 
O_628 O 0.5931 0.7036 0.2440 0.408 Uani 0.60 1 d PU F 2 
O_630 O 0.5854 0.7739 0.2939 0.342 Uani 0.60 1 d PU G 1 
O_630 O 0.6122 0.7829 0.2915 0.340 Uani 0.40 1 d PU H 2 
O_631 O 0.7875 0.5907 0.2358 0.109 Uani 0.50 1 d PU I 1 
O_631 O 0.7758 0.5780 0.2511 0.120 Uani 0.50 1 d PU J 2 
O_632 O 0.4573 0.1533 0.0848 0.131 Uani 0.60 1 d PU K 1 
O_632 O 0.4644 0.1383 0.0853 0.086 Uani 0.40 1 d PU L 2 
O_633 O 0.2314 0.1542 0.1144 0.147 Uani 0.30 1 d PU M 1 
O_633 O 0.2507 0.1701 0.1182 0.173 Uani 0.50 1 d PU N 2 
O_634 O 0.5453 0.4841 0.0268 0.127 Uani 0.50 1 d PU O 1 
O_634 O 0.5366 0.4663 0.0247 0.167 Uani 0.50 1 d PU P 2 
O_636 O 0.7127 0.2782 0.1704 0.135 Uani 0.50 1 d PU Q 1 
O_636 O 0.7319 0.2974 0.1847 0.161 Uani 0.50 1 d PU R 2 
O_637 O 0.7720 0.5953 0.3748 0.320 Uani 1 1 d U . . 
O_638 O 0.4639 0.5776 0.0882 0.124 Uani 0.50 1 d PU S 1 
O_638 O 0.4415 0.5469 0.0828 0.181 Uani 0.30 1 d PU T 2 
O_639 O 0.2774 0.2688 0.2761 0.167 Uani 0.50 1 d PU . . 
O_640 O 0.3505 0.1417 0.2411 0.164 Uani 0.50 1 d PU . . 
O_641 O 0.3754 0.3111 0.0914 0.182 Uani 0.50 1 d PU U 1 
O_641 O 0.3789 0.3271 0.0879 0.228 Uani 0.50 1 d PU V 2 
O_642 O 0.3493 0.3318 0.0845 0.248 Uani 0.50 1 d PU . . 
O_643 O 0.5447 0.7254 0.1858 0.232 Uani 0.60 1 d PU W 1 
O_643 O 0.5641 0.7524 0.1809 0.184 Uani 0.40 1 d PU X 2 
O_644 O 0.7964 0.8242 0.1502 0.312 Uani 1 1 d U . . 
O_645 O 0.3413 0.2781 0.0900 0.430 Uani 1 1 d U . . 
O_646 O 0.6679 0.2391 0.1872 0.210 Uani 0.50 1 d PU . . 
O_647 O 0.7653 0.7973 0.3075 0.248 Uani 0.50 1 d PU . . 
O_648 O 0.3270 0.1067 0.1027 0.207 Uani 0.50 1 d PU Y 1 
O_648 O 0.3054 0.0903 0.1024 0.363 Uani 0.50 1 d PU Z 2 
O_649 O 0.3499 0.1187 0.0672 0.615 Uani 1 1 d U . . 
O_650 O 0.8378 0.7046 0.3281 0.234 Uani 0.50 1 d PU . . 
O_651 O 0.8574 0.7997 0.1050 0.374 Uani 1 1 d U . . 
O_652 O 0.6053 0.2023 0.1009 0.271 Uani 0.50 1 d PU . . 
O_657 O 0.5348 0.5073 0.0207 0.189 Uani 0.50 1 d PU A 1 
O_657 O 0.5569 0.5140 0.0008 0.156 Uani 0.50 1 d PU B 2 
O_658 O 0.4127 0.5540 -0.0282 0.090 Uani 0.50 1 d PU C 1 
O_658 O 0.3868 0.5432 -0.0187 0.192 Uani 0.50 1 d PU D 2 
O_659 O 0.9101 0.5514 0.2708 0.180 Uani 0.70 1 d PU E 1 
O_659 O 0.8810 0.5149 0.2676 0.199 Uani 0.30 1 d PU F 2 
O_661 O 0.4046 0.4715 0.0278 0.258 Uani 0.40 1 d PU G 1 
O_661 O 0.4068 0.4922 0.0297 0.115 Uani 0.40 1 d PU H 2 
O_662 O 0.5074 0.3823 0.0229 0.161 Uani 0.50 1 d PU I 1 
O_662 O 0.5265 0.4115 0.0343 0.188 Uani 0.50 1 d PU J 2 
O_663 O 0.6642 0.6336 -0.0111 0.181 Uani 0.50 1 d PU K 1 
O_663 O 0.6315 0.5976 -0.0151 0.316 Uani 0.50 1 d PU L 2 
O_664 O 0.8003 0.4687 0.0450 0.217 Uani 0.43 1 d PU . . 
O_665 O 0.8185 0.5089 0.0399 0.127 Uani 0.50 1 d PU . . 
O_666 O 0.3603 0.0975 0.1132 0.181 Uani 0.50 1 d PU . . 
O_667 O 0.5837 0.3519 0.4026 0.177 Uani 0.50 1 d PU M 1 
O_667 O 0.5742 0.3615 0.3932 0.112 Uani 0.50 1 d PU N 2 
O_668 O 0.8459 0.6024 0.3231 0.351 Uani 0.50 1 d PU O 1 
O_668 O 0.8488 0.5838 0.3076 0.192 Uani 0.50 1 d PU P 2 
O_669 O 0.8198 0.6181 0.0371 0.249 Uani 0.50 1 d PU . . 
O_670 O 0.4753 0.5383 0.0263 0.428 Uani 1 1 d U . . 
O_671 O 0.3157 0.4071 0.2700 0.200 Uani 0.50 1 d PU . . 
O_672 O 0.4497 0.3980 0.0343 0.247 Uani 0.50 1 d PU Q 1 
O_672 O 0.4321 0.4098 0.0305 0.274 Uani 0.50 1 d PU R 2 
O_674 O 0.6369 0.5929 0.3833 0.322 Uani 0.50 1 d PU . . 
O_675 O 0.6272 0.8215 0.0114 0.183 Uani 0.50 1 d PU . . 
O_677 O 0.2985 0.2589 0.0891 0.253 Uani 0.50 1 d PU . . 
O_678 O 0.6437 0.6128 0.3991 0.314 Uani 0.50 1 d PU S 1 
O_678 O 0.6065 0.6075 0.4059 0.247 Uani 0.50 1 d PU T 2 
O_679 O 0.8824 0.7370 0.0679 0.175 Uani 0.30 1 d PU . . 
O_681 O 0.3395 0.0584 0.1644 0.273 Uani 0.50 1 d PU . . 
O_683 O 0.3546 0.4598 0.2755 0.262 Uani 0.50 1 d PU . . 
O_685 O 0.5059 0.7645 0.0334 0.357 Uani 0.80 1 d PU U 1 
O_685 O 0.4777 0.7618 0.0279 0.160 Uani 0.20 1 d PU V 2 
O_686 O 0.5563 0.3946 -0.0497 0.214 Uani 0.50 1 d PU W 1 
O_686 O 0.5204 0.3582 -0.0526 0.306 Uani 0.50 1 d PU X 2 
O_687 O 0.6541 0.7758 0.3429 0.216 Uani 0.50 1 d PU . . 
O_688 O 0.8294 0.6210 0.3409 0.259 Uani 0.50 1 d PU . . 
O_690 O 0.3536 0.1744 0.0374 0.747 Uani 1 1 d U . . 
O_691 O 0.7139 0.7146 0.0329 0.298 Uani 0.50 1 d PU Y 1 
O_691 O 0.7395 0.7384 0.0315 0.250 Uani 0.30 1 d PU Z 2 
O_692 O 0.9248 0.4985 0.2315 0.250 Uani 0.74 1 d PU B 1 
O_692 O 0.9215 0.4957 0.2038 0.072 Uani 0.26 1 d PU B 2 
O_693 O 0.6706 0.2182 0.2788 0.157 Uani 0.50 1 d PU A 1 
O_693 O 0.6765 0.2120 0.2963 0.160 Uani 0.30 1 d PU B 2 
O_694 O 0.4041 0.0862 0.2212 0.263 Uani 0.50 1 d PU C 1 
O_694 O 0.3929 0.0786 0.2120 0.272 Uani 0.50 1 d PU D 2 
O_695 O 0.8504 0.6497 0.0666 0.305 Uani 0.50 1 d PU E 1 
O_695 O 0.8394 0.6468 0.0611 0.348 Uani 0.50 1 d PU F 2 
O_696 O 0.5978 0.5137 0.4064 0.384 Uani 0.60 1 d PU G 1 
O_696 O 0.5793 0.5290 0.3978 0.195 Uani 0.30 1 d PU H 2 
O_697 O 0.5928 0.5126 -0.0247 0.301 Uani 0.70 1 d PU I 1 
O_697 O 0.5957 0.5110 -0.0103 0.166 Uani 0.30 1 d PU J 2 
O_698 O 0.7442 0.2869 0.0828 0.145 Uani 0.30 1 d PU K 1 
O_698 O 0.7300 0.2848 0.0782 0.151 Uani 0.30 1 d PU L 2 
O_699 O 0.5843 0.1598 0.1928 0.269 Uani 0.50 1 d PU M 1 
O_699 O 0.5729 0.1618 0.2025 0.360 Uani 0.50 1 d PU N 2 
O_700 O 0.2915 0.1432 0.2251 0.177 Uani 0.50 1 d PU O 1 
O_700 O 0.2911 0.1623 0.2212 0.224 Uani 0.50 1 d PU P 2 
O_701 O 0.4344 0.3648 0.3783 0.258 Uani 0.60 1 d PU Q 1 
O_701 O 0.4183 0.3627 0.3826 0.103 Uani 0.20 1 d PU R 2 
O_702 O 0.7083 0.7814 0.2451 0.595 Uani 1 1 d U . . 
O_703 O 0.3641 0.4332 0.3113 0.279 Uani 0.50 1 d PU S 1 
O_703 O 0.3993 0.4661 0.3156 0.266 Uani 0.50 1 d PU T 2 
O_704 O 0.5577 0.1493 0.1103 0.284 Uani 0.50 1 d PU U 1 
O_704 O 0.5451 0.1413 0.1170 0.383 Uani 0.50 1 d PU V 2 
O_705 O 0.2453 0.2648 0.0696 0.258 Uani 0.50 1 d PU . . 
O_706 O 0.4429 0.4725 0.0068 0.241 Uani 0.50 1 d PU . . 
O_708 O 0.6738 0.2532 0.0882 0.282 Uani 0.50 1 d PU . . 
O_709 O 0.6911 0.8516 0.1687 0.342 Uani 0.50 1 d PU . . 
O_710 O 0.4919 0.3371 0.0209 0.237 Uani 0.50 1 d PU . . 
O_711 O 0.4041 0.4944 0.3457 0.375 Uani 1 1 d U . . 
O_712 O 0.7237 0.5835 0.3931 0.318 Uani 0.60 1 d PU W 1 
O_712 O 0.7144 0.5631 0.4029 0.082 Uani 0.40 1 d PU X 2 
O_713 O 0.4966 0.1014 0.2257 0.284 Uani 0.50 1 d PU Y 1 
O_713 O 0.4886 0.1144 0.2109 0.244 Uani 0.50 1 d PU Z 2 
O_714 O 0.7282 0.7927 0.0189 0.569 Uani 1 1 d U . . 
O_715 O 0.7045 0.6540 0.0006 0.357 Uani 0.50 1 d PU . . 
O_716 O 0.3634 0.4950 0.3247 0.351 Uani 0.50 1 d PU A 1 
O_716 O 0.3758 0.5314 0.3453 0.176 Uani 0.25 1 d PU B 2 
O_717 O 0.6654 0.8637 0.1256 0.304 Uani 0.50 1 d PU . . 
O_719 O 0.5925 0.4126 -0.1026 0.209 Uani 0.50 1 d PU C 1 
O_719 O 0.5869 0.4286 -0.0978 0.091 Uani 0.50 1 d PU D 2 
O_720 O 0.4933 0.6164 0.0651 0.108 Uani 0.50 1 d PU E 1 
O_720 O 0.5114 0.6130 0.0520 0.166 Uani 0.50 1 d PU F 2 
O_721 O 0.8028 0.3944 0.2136 0.189 Uani 0.50 1 d PU G 1 
O_721 O 0.8031 0.3794 0.2272 0.128 Uani 0.25 1 d PU H 2 
O_722 O 0.2515 0.1297 0.2040 0.206 Uani 0.50 1 d PU . . 
O_723 O 0.6383 0.5761 -0.0090 0.367 Uani 0.50 1 d PU I 1 
O_723 O 0.6661 0.5955 -0.0067 0.255 Uani 0.50 1 d PU J 2 
O_724 O 0.8003 0.5185 0.0124 0.249 Uani 0.50 1 d PU K 1 
O_724 O 0.7930 0.5376 0.0214 0.345 Uani 0.50 1 d PU L 2 
O_726 O 0.6029 0.5504 -0.0158 0.598 Uani 1 1 d U . . 
O_727 O 0.3639 0.4966 0.2947 0.212 Uani 0.50 1 d PU . . 
O_730 O 0.5157 0.3066 0.0334 0.333 Uani 0.50 1 d PU . . 
O_731 O 0.5344 0.1080 0.1492 0.476 Uani 1 1 d U . . 
O_732 O 0.4099 0.2332 0.3408 0.251 Uani 0.50 1 d PU M 1 
O_732 O 0.4397 0.2313 0.3425 0.206 Uani 0.50 1 d PU N 2 
O_733 O 0.4754 0.6969 0.1803 0.283 Uani 0.50 1 d PU . . 
O_734 O 0.5805 0.4657 -0.0383 0.389 Uani 0.50 1 d PU . . 
O_736 O 0.8209 0.4793 0.3003 0.225 Uani 0.50 1 d PU . . 
O_737 O 0.2152 0.1432 0.1484 0.230 Uani 0.30 1 d PU O 1 
O_737 O 0.2205 0.1403 0.1331 0.318 Uani 0.30 1 d PU P 2 
O_738 O 0.4434 0.3579 0.0366 0.146 Uani 0.30 1 d PU . . 
O_739 O 0.9714 0.8163 0.2038 0.325 Uani 0.50 1 d PU . . 
O_742 O 0.6124 0.1350 0.2465 0.336 Uani 0.50 1 d PU . . 
O_744 O 0.5509 0.3631 0.3967 0.218 Uani 0.50 1 d PU . . 
O_753 O 0.5564 0.6877 0.2283 0.494 Uani 1 1 d U . . 
O_754 O 0.4121 0.4753 0.2813 0.341 Uani 0.50 1 d PU Q 1 
O_754 O 0.3988 0.4857 0.2879 0.319 Uani 0.50 1 d PU R 2 
O_755 O 0.2686 0.2195 0.2510 0.262 Uani 0.50 1 d PU S 1 
O_755 O 0.2677 0.2282 0.2745 0.371 Uani 0.50 1 d PU T 2 
O_756 O 0.8371 0.8477 0.1276 0.431 Uani 0.50 1 d PU U 1 
O_756 O 0.8401 0.8572 0.1575 0.374 Uani 0.50 1 d PU V 2 
O_757 O 0.3092 0.0769 0.2088 0.269 Uani 0.50 1 d PU . . 
O_758 O 0.7697 0.7683 0.3524 0.521 Uani 1 1 d U . . 
O_759 O 0.8904 0.6501 0.0768 0.412 Uani 0.50 1 d PU W 1 
O_759 O 0.8912 0.6573 0.0609 0.518 Uani 0.50 1 d PU X 2 
O_760 O 0.6227 0.8501 0.1264 0.386 Uani 0.50 1 d PU . . 
O_761 O 0.3935 0.2933 0.0208 0.309 Uani 0.50 1 d PU . . 
O_762 O 0.4054 0.2793 0.3846 0.251 Uani 0.30 1 d PU . . 
O_763 O 0.5451 0.1268 0.2118 0.177 Uani 0.30 1 d PU . . 
O_764 O 0.2759 0.1707 0.2366 0.309 Uani 0.50 1 d PU . . 
O_765 O 0.5749 0.1784 0.2284 0.262 Uani 0.50 1 d PU . . 
O_766 O 0.3493 0.1943 0.2951 0.335 Uani 0.50 1 d PU Y 1 
O_766 O 0.2920 0.1563 0.2896 0.424 Uani 0.50 1 d PU Z 2 
O_767 O 0.5481 0.3888 -0.0279 0.366 Uani 0.50 1 d PU A 1 
O_767 O 0.5463 0.3928 -0.0100 0.375 Uani 0.50 1 d PU B 2 
O_772 O 0.8167 0.9114 0.0749 0.317 Uani 0.50 1 d PU C 1 
O_772 O 0.8224 0.8883 0.0669 0.178 Uani 0.50 1 d PU D 2 
O_774 O 0.4447 0.0884 0.0937 0.466 Uani 0.50 1 d PU . . 
O_775 O 0.3522 0.4128 0.0496 0.371 Uani 0.50 1 d PU . . 
O_777 O 0.2429 0.1068 0.1506 0.359 Uani 0.50 1 d PU . . 
O_782 O 0.5761 0.4610 0.4103 0.327 Uani 0.50 1 d PU E 1 
O_782 O 0.5583 0.4760 0.4172 0.310 Uani 0.50 1 d PU F 2 
O_784 O 0.5189 0.4398 0.4100 0.534 Uani 1 1 d U . . 
O_785 O 0.8153 0.5645 0.0176 0.251 Uani 0.50 1 d PU G 1 
O_785 O 0.8098 0.5717 -0.0085 0.373 Uani 0.50 1 d PU H 2 
O_786 O 0.8792 0.8025 0.2811 0.353 Uani 0.50 1 d PU . . 
O_787 O 0.6691 0.8646 0.0426 0.510 Uani 0.50 1 d PU . . 
O_789 O 0.7977 0.8044 0.0377 0.250 Uani 0.50 1 d PU . . 
O_793 O 0.6171 0.7380 0.4283 0.322 Uani 0.50 1 d PU . . 
O_797 O 0.8650 0.5173 0.3002 0.246 Uani 0.50 1 d PU . . 
O_800 O 0.8486 0.8129 0.2982 0.516 Uani 0.50 1 d PU . . 
O_805 O 0.6318 0.8040 0.3486 0.414 Uani 0.50 1 d PU . . 
O_807 O 0.3775 0.3588 0.3401 0.145 Uani 0.29 1 d PU T 1 
O_808 O 0.4252 0.4202 0.3649 0.214 Uani 0.72 1 d PU . . 
O_809 O 0.8260 0.6375 0.2797 0.147 Uani 0.26 1 d PU . . 
O_810 O 0.4969 0.5735 0.2467 0.139 Uani 0.30 1 d PU . . 
O_815 O 0.6678 0.2083 0.2377 0.327 Uani 0.60 1 d PU . . 
O_816 O 0.5986 0.5986 0.0000 0.316 Uani 0.40 2 d SPU I 1 
O_816 O 0.6138 0.6138 0.0000 0.404 Uani 0.40 2 d SPU J 2 
O_824 O 0.8242 0.7302 0.0524 0.381 Uani 0.50 1 d PU . . 
O_825 O 0.7618 0.5157 0.3434 0.122 Uani 0.25 1 d PU . . 
O_826 O 0.7819 0.5616 0.3706 0.034 Uani 0.25 1 d PU K 1 
O_826 O 0.7954 0.5694 0.3560 0.199 Uani 0.25 1 d PU L 2 
O_827 O 0.7037 0.2596 0.0295 0.065 Uani 0.30 1 d PU M 1 
O_827 O 0.7139 0.2665 0.0156 0.239 Uani 0.30 1 d PU N 2 
O_829 O 0.4632 0.5906 0.0631 0.273 Uani 0.50 1 d PU . . 
O_830 O 0.3800 0.2196 0.3168 0.355 Uani 0.50 1 d PU O 1 
O_830 O 0.3887 0.2153 0.2951 0.340 Uani 0.50 1 d PU P 2 
O_831 O 0.8354 0.5028 0.0602 0.248 Uani 0.50 1 d PU . . 
O_832 O 0.8143 0.5407 0.0389 0.251 Uani 0.50 1 d PU . . 
O_833 O 0.5554 0.5818 0.1765 0.168 Uani 0.60 1 d PU Q 1 
O_833 O 0.5438 0.5872 0.1832 0.152 Uani 0.30 1 d PU R 2 
O_834 O 0.8895 0.8150 0.1475 0.254 Uani 0.50 1 d PU . . 
O_835 O 0.5706 0.4725 0.0024 0.149 Uani 0.30 1 d PU . . 
O_842 O 0.4198 0.2515 0.0081 0.200 Uani 0.30 1 d PU . . 
O_843 O 0.3641 0.2085 0.3463 0.308 Uani 0.50 1 d PU S 1 
O_844 O 0.7115 0.8011 0.2961 0.335 Uani 0.50 1 d PU T 1 
O_844 O 0.7111 0.7969 0.2719 0.357 Uani 0.50 1 d PU U 2 
O_849 O 0.8768 0.6764 0.3009 0.312 Uani 0.50 1 d PU V 1 
O_849 O 0.8874 0.7007 0.3056 0.363 Uani 0.30 1 d PU W 2 
O_850 O 0.5482 0.7373 0.2773 0.264 Uani 0.50 1 d PU . . 
O_851 O 0.2734 0.2376 0.3345 0.531 Uani 1 1 d U . . 
O_853 O 0.8646 0.5856 0.0217 0.562 Uani 0.50 1 d PU . . 
O_854 O 0.8265 0.7721 0.3568 0.391 Uani 0.50 1 d PU . . 
O_855 O 0.4916 0.5483 0.4349 0.635 Uani 1 1 d U . . 
O_856 O 0.8484 0.7681 0.3197 0.360 Uani 0.50 1 d PU . . 
O_857 O 0.7064 0.6761 0.3968 0.775 Uani 0.50 1 d PU . . 
O_858 O 0.6688 0.6814 0.0109 0.581 Uani 1 1 d U . . 
O_859 O 0.8205 0.8959 0.1632 0.319 Uani 0.50 1 d PU . . 
O_860 O 1.0000 0.8271 0.1647 0.451 Uani 0.50 1 d PU . . 
O_861 O 0.7713 0.6429 0.3444 0.457 Uani 0.50 1 d PU X 1 
O_861 O 0.7424 0.6172 0.3501 0.218 Uani 0.30 1 d PU Y 2 
O_862 O 0.4971 0.6983 0.2380 0.394 Uani 0.50 1 d PU Z 1 
O_862 O 0.4920 0.6855 0.2518 0.173 Uani 0.30 1 d PU A 2 
O_863 O 0.7770 0.8322 0.3313 0.807 Uani 1 1 d U . . 
O_864 O 0.4111 0.0401 0.1516 0.395 Uani 0.50 1 d PU . . 
O_865 O 0.8935 0.7571 0.0990 0.235 Uani 0.40 1 d PU B 2 
O_867 O 0.5286 0.6443 0.3913 0.188 Uani 0.65 1 d PU . . 
O_868 O 0.5716 0.6480 0.4285 0.451 Uani 0.40 1 d PU C 1 
O_868 O 0.5502 0.6658 0.4157 0.181 Uani 0.30 1 d PU D 2 
O_870 O 0.4624 0.6592 0.1881 0.108 Uani 0.20 1 d PU . . 
O_871 O 0.3667 0.3041 0.0394 0.408 Uani 0.50 1 d PU . . 
O_874 O 0.4307 0.5143 0.0460 0.256 Uani 0.75 1 d PU E 1 
O_874 O 0.4476 0.5070 0.0553 0.180 Uani 0.25 1 d PU F 2 
O_875 O 0.6681 0.2181 0.3065 0.256 Uani 0.50 1 d PU . . 
O_876 O 0.3517 0.0540 0.1951 0.449 Uani 0.50 1 d PU . . 
O_877 O 0.4611 0.5547 0.1721 0.072 Uani 0.20 1 d PU . . 
O_878 O 0.5423 0.5696 0.1531 0.150 Uani 0.30 1 d PU G 1 
O_878 O 0.4962 0.5444 0.1633 0.255 Uani 0.30 1 d PU H 2 
O_879 O 0.4178 0.4830 0.2004 0.334 Uani 0.50 1 d PU . . 
O_880 O 0.5161 0.5841 0.2135 0.087 Uani 0.25 1 d PU . . 
O_881 O 0.8463 0.6796 0.0535 0.237 Uani 0.50 1 d PU . . 
O_882 O 0.6495 0.8099 0.2953 0.431 Uani 0.40 1 d PU . . 
O_883 O 0.5168 0.4403 0.0127 0.368 Uani 0.50 1 d PU I 1 
O_883 O 0.5354 0.4433 -0.0038 0.231 Uani 0.30 1 d PU J 2 
O_884 O 0.4521 0.6442 0.1360 0.167 Uani 0.25 1 d PU K 1 
O_884 O 0.4733 0.6662 0.1374 0.195 Uani 0.25 1 d PU L 2 
O_885 O 0.4599 0.5965 0.1864 0.171 Uani 0.30 1 d PU . . 
O_886 O 0.7621 0.8465 0.0218 0.350 Uani 0.50 1 d PU M 1 
O_886 O 0.7492 0.8535 0.0130 0.459 Uani 0.50 1 d PU N 2 
O_887 O 0.5893 0.7500 0.2209 0.374 Uani 0.50 1 d PU O 1 
O_887 O 0.5983 0.7235 0.2246 0.289 Uani 0.30 1 d PU P 2 
O_888 O 0.6347 0.8059 0.2083 0.532 Uani 0.50 1 d PU . . 
O_889 O 0.2517 0.2937 0.2858 0.364 Uani 0.50 1 d PU . . 
O_892 O 0.2442 0.3223 0.2609 0.361 Uani 0.50 1 d PU . . 
O_893 O 0.6079 0.3372 0.1239 0.450 Uani 0.50 1 d PU . . 
O_894 O 0.9529 0.8372 0.1926 0.706 Uani 1 1 d U . . 
O_895 O 0.6751 0.5784 0.3979 0.169 Uani 0.30 1 d PU . . 
O_897 O 0.9106 0.6053 0.2621 0.276 Uani 0.30 1 d PU . . 
O_898 O 0.2796 0.1117 0.0614 0.433 Uani 0.50 1 d PU . . 
O_899 O 0.3221 0.1884 0.0170 0.494 Uani 0.50 1 d PU . . 
O_900 O 0.6402 0.7738 0.2218 0.346 Uani 0.50 1 d PU . . 
O_901 O 0.6698 0.8855 0.0826 0.308 Uani 0.50 1 d PU . . 
O_903 O 0.7589 0.8144 0.2736 0.342 Uani 0.30 1 d PU Q 1 
O_903 O 0.7824 0.8156 0.2515 0.260 Uani 0.30 1 d PU R 2 
O_905 O 0.3193 0.3719 0.0734 0.408 Uani 0.50 1 d PU . . 
O_906 O 0.4935 0.7717 0.1363 0.335 Uani 0.50 1 d PU S 1 
O_906 O 0.4709 0.7412 0.1414 0.305 Uani 0.30 1 d PU T 2 
O_907 O 0.5134 0.0891 0.1819 0.575 Uani 0.50 1 d PU . . 
O_908 O 0.8008 0.8185 0.2783 0.316 Uani 0.30 1 d PU . . 
O_910 O 0.5865 0.5256 0.2433 0.153 Uani 0.30 1 d PU . . 
O_911 O 0.7082 0.2625 0.1386 0.385 Uani 0.30 1 d PU U 1 
O_911 O 0.6830 0.2568 0.1235 0.486 Uani 0.50 1 d PU V 2 
O_917 O 0.5329 0.0854 0.1193 0.288 Uani 0.30 1 d PU . . 
O_918 O 0.7265 0.2942 0.0666 0.112 Uani 0.20 1 d PU . . 
O_919 O 0.5827 0.4365 0.4164 0.194 Uani 0.30 1 d PU W 1 
O_919 O 0.5572 0.4412 0.4068 0.148 Uani 0.30 1 d PU X 2 
O_920 O 0.5331 0.7912 0.0993 0.131 Uani 0.15 1 d PU Y 1 
O_920 O 0.5311 0.7878 0.1244 0.272 Uani 0.30 1 d PU Z 2 
O_921 O 0.2368 0.1848 0.2110 0.253 Uani 0.30 1 d PU A 1 
O_921 O 0.2196 0.1712 0.2005 0.293 Uani 0.30 1 d PU B 2 
O_922 O 0.2410 0.2327 0.1937 0.144 Uani 0.50 1 d PU . . 
O_923 O 0.9240 0.7402 0.2731 0.072 Uani 0.30 1 d PU . . 
O_926 O 0.2829 0.3716 0.2533 0.267 Uani 0.50 1 d PU . . 
O_927 O 0.6188 0.1724 0.2050 0.315 Uani 0.50 1 d PU . . 
O_928 O 0.2945 0.0919 0.1261 0.452 Uani 0.50 1 d PU . . 
O_929 O 0.5660 0.3350 0.3885 0.206 Uani 0.30 1 d PU . . 
O_937 O 0.4799 0.0765 0.1278 0.569 Uani 0.50 1 d PU . . 
O1_938 O 0.3880 0.3542 0.3402 0.276 Uani 0.50 1 d PU . . 
O_940 O 0.6953 0.7473 0.3926 0.245 Uani 0.40 1 d PU C 1 
O_940 O 0.6911 0.7485 0.3762 0.229 Uani 0.30 1 d PU D 2 
O_941 O 0.8580 0.6218 0.0217 0.367 Uani 0.50 1 d PU E 1 
O_941 O 0.8854 0.6377 0.0356 0.376 Uani 0.50 1 d PU F 2 
O_942 O 0.6881 0.1990 0.2920 0.218 Uani 0.30 1 d PU . . 
O3_943 O 0.9056 0.7258 0.2621 0.111 Uani 0.25 1 d PU . . 
O_944 O 0.4319 0.5352 0.0728 0.140 Uani 0.20 1 d PU . . 
O_945 O 0.2251 0.1389 0.1909 0.312 Uani 0.30 1 d PU . . 
O_946 O 0.7485 0.6218 0.3803 0.535 Uani 0.50 1 d PU . . 
O_947 O 0.6865 0.5888 0.4125 0.254 Uani 0.30 1 d PU . . 
O_948 O 0.3817 0.0521 0.2138 0.308 Uani 0.20 1 d PU . . 
O_949 O 0.6369 0.7774 0.2802 0.417 Uani 0.50 1 d PU . . 
O_950 O 0.7278 0.2446 0.0634 0.248 Uani 0.30 1 d PU . . 
O_951 O 0.7106 0.2669 0.0700 0.139 Uani 0.20 1 d PU . . 
O_952 O 0.6077 0.8152 0.1808 0.081 Uani 0.20 1 d PU . . 
O_953 O 0.6316 0.8340 0.1700 0.077 Uani 0.20 1 d PU . . 
O_954 O 0.6176 0.8105 0.1670 0.134 Uani 0.20 1 d PU G 1 
O_954 O 0.6380 0.8204 0.1797 0.166 Uani 0.30 1 d PU H 2 
O_956 O 0.6941 0.6456 0.4269 0.455 Uani 0.50 1 d PU . . 
O_957 O 0.4267 0.0444 0.1185 0.311 Uani 0.30 1 d PU . . 
O_962 O 0.3718 0.0281 0.1074 0.301 Uani 0.30 1 d PU . . 
O_963 O 0.3927 0.3441 0.0371 0.531 Uani 0.50 1 d PU . . 
O_965 O 0.3996 0.2095 0.3761 0.771 Uani 0.50 1 d PU . . 
O_966 O 0.3347 0.2224 0.3712 0.417 Uani 0.50 1 d PU . . 
O_967 O 0.8618 0.5746 0.2989 0.265 Uani 0.30 1 d PU . . 
O_968 O 0.5226 0.6208 0.4119 0.332 Uani 0.30 1 d PU . . 
O_969 O 0.6600 0.7563 0.4297 0.217 Uani 0.30 1 d PU . . 
O_970 O 0.3693 0.0374 0.2299 0.343 Uani 0.30 1 d PU . . 
O_971 O 0.6837 0.1709 0.3216 0.413 Uani 0.30 1 d PU . . 
O_972 O 0.7038 0.2133 0.0869 0.409 Uani 0.50 1 d PU . . 
O_973 O 0.4675 0.6867 0.1409 0.199 Uani 0.30 1 d PU . . 
O_974 O 0.7945 0.5908 -0.0313 0.208 Uani 0.30 1 d PU . . 
O_975 O 0.6751 0.8498 -0.0006 0.376 Uani 0.30 1 d PU . . 
O_976 O 0.5752 0.5411 -0.0050 0.265 Uani 0.30 1 d PU . . 
O_977 O 0.2345 0.1461 0.2490 0.345 Uani 0.30 1 d PU . . 
O_980 O 0.5157 0.7500 0.1550 0.227 Uani 0.30 1 d PU . . 
O_983 O 0.6675 0.7359 0.4446 0.287 Uani 0.20 1 d PU . . 
O_987 O 0.5588 0.8255 0.0404 0.490 Uani 0.30 1 d PU . . 
 
loop_ 
 _atom_site_aniso_label 
 _atom_site_aniso_U_11 
 _atom_site_aniso_U_22 
 _atom_site_aniso_U_33 
 _atom_site_aniso_U_23 
 _atom_site_aniso_U_13 
 _atom_site_aniso_U_12 
CB_1 0.069 0.089 0.076 -0.006 0.007 0.046 
C_1 0.071 0.053 0.037 -0.007 0.004 0.032 
O_1 0.086 0.081 0.049 0.018 0.013 0.048 
N_1 0.088 0.067 0.057 -0.008 0.012 0.015 
CA_1 0.070 0.060 0.048 -0.007 0.000 0.026 
N_2 0.065 0.055 0.035 -0.003 0.000 0.032 
CA_2 0.068 0.050 0.032 -0.002 0.001 0.031 
CB_2 0.060 0.052 0.043 -0.001 0.001 0.027 
CG_2 0.066 0.058 0.034 -0.001 0.002 0.032 
OD1_2 0.083 0.053 0.055 -0.005 0.013 0.031 
ND2_2 0.068 0.065 0.034 -0.002 0.004 0.033 
C_2 0.074 0.049 0.037 -0.004 -0.004 0.036 
O_2 0.130 0.071 0.065 -0.022 -0.042 0.070 
N_3 0.055 0.043 0.032 0.000 0.003 0.027 
CA_3 0.054 0.041 0.034 -0.002 0.004 0.026 
CB_3 0.058 0.055 0.031 -0.002 0.006 0.033 
CG2_3 0.068 0.065 0.040 -0.012 0.003 0.036 
CG1_3 0.071 0.057 0.040 0.007 0.012 0.031 
CD1_3 0.062 0.071 0.064 0.006 0.012 0.030 
C_3 0.052 0.050 0.036 -0.004 0.002 0.029 
O_3 0.057 0.061 0.060 0.006 0.008 0.035 
N_4 0.045 0.045 0.044 0.001 0.005 0.025 
CA_4 0.045 0.043 0.041 0.000 0.006 0.023 
CB_4 0.060 0.050 0.040 -0.005 0.006 0.029 
CG1_4 0.068 0.059 0.039 0.003 0.013 0.035 
CG2_4 0.090 0.054 0.051 -0.007 0.013 0.036 
C_4 0.042 0.045 0.031 0.001 0.005 0.024 
O_4 0.043 0.051 0.042 -0.007 0.001 0.025 
N_5 0.041 0.045 0.037 0.000 0.002 0.025 
CA_5 0.041 0.047 0.033 -0.003 -0.001 0.024 
C_5 0.037 0.039 0.035 -0.002 0.002 0.017 
O_5 0.054 0.057 0.030 0.004 0.009 0.033 
N_6 0.042 0.042 0.028 -0.001 0.002 0.021 
CA_6 0.048 0.042 0.037 0.000 0.004 0.025 
C_6 0.049 0.047 0.036 0.002 0.002 0.029 
O_6 0.060 0.055 0.063 -0.004 -0.010 0.036 
N_7 0.048 0.049 0.035 -0.002 -0.004 0.029 
CA_7 0.050 0.054 0.033 -0.004 -0.008 0.030 
CB_7 0.055 0.057 0.039 -0.011 -0.007 0.034 
CG2_7 0.074 0.073 0.043 -0.008 -0.002 0.047 
CG1_7 0.049 0.050 0.046 -0.010 -0.005 0.027 
CD1_7 0.062 0.050 0.075 -0.011 -0.005 0.030 
C_7 0.048 0.041 0.035 -0.004 -0.005 0.028 
O_7 0.054 0.053 0.033 -0.006 -0.008 0.035 
N_8 0.052 0.058 0.034 -0.006 -0.007 0.034 
CA_8 0.046 0.049 0.044 -0.006 -0.009 0.028 
CB_8 0.053 0.054 0.052 -0.007 -0.016 0.030 
CG_8 0.055 0.074 0.077 -0.001 -0.010 0.038 
CD_8 0.068 0.091 0.101 -0.029 -0.033 0.053 
OE1_8 0.088 0.119 0.172 -0.044 -0.067 0.052 
OE2_8 0.094 0.118 0.113 0.018 -0.037 0.056 
C_8 0.049 0.051 0.047 -0.008 -0.008 0.032 
O_8 0.071 0.054 0.054 -0.005 0.004 0.037 
N_9 0.049 0.046 0.041 -0.007 -0.005 0.027 
CA_9 0.051 0.045 0.045 -0.006 -0.004 0.028 
CB_9 0.049 0.048 0.050 -0.003 -0.003 0.030 
CG_9 0.045 0.048 0.051 0.001 -0.006 0.032 
CD1_9 0.038 0.056 0.048 0.005 -0.002 0.023 
CE1_9 0.043 0.065 0.045 0.008 0.000 0.031 
CD2_9 0.043 0.057 0.048 0.004 0.000 0.030 
CE2_9 0.042 0.054 0.040 0.001 -0.005 0.025 
CZ_9 0.044 0.056 0.042 0.001 -0.007 0.031 
OH_9 0.053 0.067 0.038 -0.004 -0.005 0.031 
C_9 0.051 0.053 0.042 -0.005 -0.011 0.033 
O_9 0.051 0.052 0.061 -0.010 -0.006 0.032 
N_10 0.049 0.050 0.050 -0.005 -0.006 0.028 
CA_10 0.045 0.055 0.055 -0.007 -0.008 0.029 
CB_10 0.053 0.075 0.060 -0.009 -0.013 0.037 
OG_10 0.056 0.070 0.080 -0.009 -0.020 0.028 
C_10 0.038 0.055 0.055 -0.006 -0.010 0.024 
O_10 0.050 0.059 0.059 -0.002 -0.005 0.034 
N_11 0.042 0.058 0.055 -0.002 -0.005 0.032 
CA_11 0.043 0.058 0.050 0.000 -0.005 0.031 
CB_11 0.049 0.059 0.053 0.000 -0.006 0.031 
CG2_11 0.056 0.077 0.055 -0.004 -0.005 0.029 
CG1_11 0.045 0.057 0.060 0.003 -0.006 0.028 
CD1_11 0.048 0.064 0.068 0.003 -0.005 0.029 
C_11 0.047 0.068 0.054 -0.002 -0.007 0.036 
O_11 0.049 0.073 0.076 -0.010 -0.009 0.040 
N_12 0.039 0.072 0.069 0.004 0.002 0.032 
CA_12 0.040 0.091 0.082 0.003 0.004 0.035 
CB_12 0.070 0.130 0.077 0.009 0.010 0.066 
CG_12 0.077 0.156 0.088 0.021 0.017 0.080 
OD1_12 0.093 0.163 0.109 0.039 0.015 0.094 
ND2_12 0.186 0.267 0.098 -0.033 -0.037 0.179 
C_12 0.039 0.066 0.086 -0.001 -0.002 0.024 
O_12 0.040 0.087 0.097 -0.001 -0.003 0.035 
N_13 0.045 0.067 0.083 -0.001 -0.013 0.030 
CA_13 0.049 0.074 0.082 -0.009 -0.015 0.030 
CB_13 0.055 0.078 0.099 -0.011 -0.015 0.026 
CG_13 0.062 0.085 0.139 -0.021 -0.031 0.043 
OD1_13 0.092 0.121 0.156 -0.066 -0.047 0.064 
ND2_13 0.073 0.075 0.269 -0.028 -0.042 0.036 
C_13 0.044 0.072 0.080 -0.002 -0.013 0.027 
O_13 0.054 0.088 0.095 -0.006 -0.026 0.037 
N_14 0.043 0.068 0.093 -0.002 -0.018 0.029 
CA_14 0.045 0.069 0.115 -0.006 -0.022 0.035 
CB_14 0.046 0.078 0.143 -0.012 0.004 0.033 
C_14 0.053 0.066 0.087 -0.005 -0.014 0.041 
O_14 0.073 0.074 0.082 -0.011 -0.020 0.041 
N_15 0.036 0.075 0.075 -0.002 -0.002 0.034 
CA_15 0.044 0.066 0.069 -0.002 -0.001 0.035 
CB_15 0.048 0.086 0.071 -0.012 -0.003 0.037 
OG_15 0.063 0.089 0.081 -0.018 -0.004 0.042 
C_15 0.042 0.061 0.063 -0.002 -0.009 0.035 
O_15 0.056 0.066 0.074 0.005 -0.003 0.042 
N_16 0.045 0.062 0.074 0.002 0.000 0.039 
CA_16 0.053 0.073 0.091 0.009 0.011 0.048 
CA_16 0.055 0.044 0.079 -0.004 0.008 0.036 
CB_16 0.136 0.129 0.091 0.031 0.040 0.109 
CG_16 0.191 0.212 0.066 0.000 0.003 0.179 
CD1_16 0.393 0.289 0.076 0.017 0.012 0.303 
CD2_16 0.140 0.185 0.085 -0.020 -0.032 0.127 
C_16 0.049 0.064 0.133 0.004 0.016 0.039 
C_16 0.045 0.048 0.103 -0.005 0.021 0.027 
O_16 0.046 0.065 0.389 -0.045 0.004 0.033 
O_16 0.058 0.072 0.046 -0.023 -0.015 0.052 
N_17 0.047 0.051 0.065 -0.007 0.007 0.029 
C_17 0.039 0.042 0.044 0.001 -0.001 0.026 
O_17 0.038 0.053 0.049 -0.012 -0.007 0.026 
CA_17 0.049 0.045 0.060 -0.004 0.007 0.028 
CA_17 0.045 0.065 0.059 -0.014 0.018 0.024 
CA_17 0.047 0.044 0.051 0.005 0.013 0.026 
CB_17 0.077 0.088 0.047 -0.008 0.010 0.048 
CB_17 0.026 0.009 0.054 -0.007 0.030 -0.018 
CB_17 0.053 0.030 0.057 0.012 0.014 0.047 
SG_17 0.067 0.062 0.051 -0.006 0.006 0.035 
SG1_17 0.123 0.129 0.046 -0.002 0.028 0.099 
SG1_17 0.073 0.167 0.101 0.020 -0.025 0.070 
N_18 0.041 0.043 0.035 -0.006 -0.006 0.025 
CA_18 0.039 0.042 0.034 -0.008 -0.007 0.026 
CB_18 0.040 0.047 0.042 0.001 -0.008 0.027 
OG_18 0.052 0.055 0.039 0.007 -0.001 0.038 
C_18 0.032 0.039 0.036 -0.004 -0.005 0.020 
O_18 0.046 0.049 0.034 -0.008 -0.011 0.029 
N_19 0.041 0.042 0.029 -0.003 -0.007 0.025 
CA_19 0.043 0.040 0.025 0.003 0.002 0.026 
CB_19 0.047 0.039 0.029 -0.001 -0.002 0.025 
CG1_19 0.062 0.046 0.036 0.000 -0.001 0.036 
CG2_19 0.053 0.042 0.039 -0.006 -0.006 0.023 
C_19 0.042 0.038 0.026 -0.001 -0.001 0.027 
O_19 0.044 0.042 0.024 0.004 0.004 0.025 
N_20 0.038 0.042 0.025 0.006 0.002 0.026 
CA_20 0.040 0.039 0.026 0.002 -0.001 0.023 
C_20 0.037 0.037 0.026 -0.001 -0.004 0.022 
O_20 0.044 0.047 0.030 0.008 0.006 0.029 
N_21 0.039 0.042 0.025 0.004 0.004 0.026 
CA_21 0.040 0.040 0.023 0.004 0.001 0.026 
CB_21 0.042 0.045 0.035 0.004 -0.001 0.028 
CG_21 0.036 0.046 0.031 0.004 -0.002 0.026 
CD1_21 0.040 0.054 0.035 0.000 -0.001 0.026 
CD2_21 0.044 0.053 0.036 -0.003 -0.004 0.029 
CE1_21 0.039 0.060 0.041 0.014 -0.002 0.021 
CE2_21 0.047 0.046 0.059 -0.008 -0.016 0.028 
CZ_21 0.037 0.045 0.066 0.010 -0.016 0.017 
C_21 0.038 0.044 0.024 0.003 0.001 0.027 
O_21 0.046 0.044 0.030 0.006 0.010 0.027 
N_22 0.044 0.042 0.022 0.007 0.004 0.027 
CA_22 0.044 0.040 0.026 0.005 0.002 0.028 
CB_22 0.055 0.048 0.028 0.000 -0.003 0.034 
OG_22 0.077 0.098 0.037 -0.018 -0.015 0.062 
C_22 0.042 0.040 0.026 0.002 0.001 0.026 
O_22 0.043 0.049 0.028 0.007 0.003 0.026 
N_23 0.040 0.040 0.023 0.004 0.002 0.024 
CA_23 0.044 0.044 0.025 0.005 0.001 0.027 
CB_23 0.048 0.051 0.025 0.001 0.001 0.028 
CG1_23 0.055 0.047 0.043 -0.005 0.003 0.025 
CG2_23 0.054 0.065 0.031 -0.002 0.004 0.035 
C_23 0.045 0.045 0.025 0.006 0.003 0.025 
O_23 0.053 0.045 0.040 0.010 0.001 0.027 
N_24 0.052 0.046 0.037 0.012 -0.001 0.027 
CA_24 0.061 0.048 0.037 0.011 -0.003 0.027 
CB_24 0.106 0.060 0.047 0.007 -0.005 0.052 
OG1_24 0.091 0.089 0.063 0.013 0.000 0.061 
CG2_24 0.136 0.088 0.054 -0.004 -0.004 0.076 
C_24 0.061 0.050 0.038 0.013 -0.003 0.029 
O_24 0.064 0.049 0.040 0.005 -0.004 0.022 
N_25 0.102 0.043 0.030 0.017 0.003 0.033 
N_25 0.029 0.089 0.044 0.006 -0.022 -0.001 
CA_25 0.089 0.059 0.034 0.013 -0.001 0.033 
CA_25 0.029 0.047 0.041 0.013 -0.005 0.004 
CB_25 0.098 0.065 0.038 0.013 -0.002 0.042 
CB_25 0.028 0.036 0.069 -0.008 -0.031 0.010 
CG_25 0.053 0.049 0.044 0.018 0.002 0.026 
CG_25 0.142 0.144 0.063 -0.016 0.015 0.054 
CD_25 0.054 0.049 0.049 0.015 -0.002 0.027 
CD_25 0.130 0.136 0.100 0.010 0.012 0.080 
NE_25 0.050 0.043 0.053 0.006 0.004 0.019 
NE_25 0.145 0.122 0.083 -0.008 0.008 0.071 
CZ_25 0.048 0.051 0.053 0.009 0.005 0.026 
CZ_25 0.174 0.118 0.210 0.046 0.082 0.091 
NH1_25 0.069 0.064 0.050 0.002 0.008 0.029 
NH1_25 0.198 0.112 0.257 0.058 0.098 0.084 
NH2_25 0.056 0.049 0.051 0.013 0.007 0.020 
NH2_25 0.190 0.154 0.276 0.003 0.106 0.093 
C_25 0.084 0.072 0.032 0.030 0.015 0.041 
C_25 0.054 0.039 0.046 -0.023 -0.023 0.012 
O_25 0.079 0.062 0.046 0.021 0.019 0.041 
O_25 0.063 0.041 0.043 -0.003 -0.009 0.010 
N_26 0.072 0.067 0.072 0.022 0.000 0.033 
CA_26 0.085 0.077 0.071 0.027 0.007 0.048 
C_26 0.085 0.078 0.078 0.027 0.019 0.054 
O_26 0.104 0.101 0.080 0.039 0.038 0.054 
N_27 0.085 0.068 0.063 0.020 0.011 0.050 
CA_27 0.104 0.074 0.075 0.014 0.014 0.060 
CB_27 0.130 0.067 0.109 0.004 -0.007 0.060 
C_27 0.112 0.079 0.063 0.004 -0.002 0.063 
O_27 0.216 0.163 0.097 -0.053 -0.061 0.148 
N_28 0.078 0.052 0.052 0.017 0.008 0.038 
CA_28 0.066 0.047 0.056 0.017 0.004 0.029 
CB_28 0.081 0.069 0.051 0.024 0.014 0.044 
OG1_28 0.117 0.111 0.071 0.051 0.037 0.078 
CG2_28 0.080 0.079 0.063 0.021 0.017 0.049 
C_28 0.068 0.045 0.045 0.010 0.000 0.031 
O_28 0.075 0.059 0.060 0.024 -0.010 0.011 
N_29 0.060 0.039 0.049 0.012 0.007 0.028 
CA_29 0.055 0.042 0.040 0.013 0.006 0.027 
CB_29 0.067 0.046 0.044 0.007 0.002 0.034 
CG_29 0.079 0.053 0.052 0.003 0.004 0.042 
CD_29 0.100 0.054 0.056 0.005 0.007 0.047 
CE_29 0.120 0.067 0.064 -0.001 0.004 0.058 
NZ_29 0.143 0.075 0.069 -0.004 0.007 0.069 
C_29 0.047 0.042 0.038 0.007 0.000 0.023 
O_29 0.046 0.048 0.054 0.015 0.011 0.026 
N_30 0.049 0.043 0.038 0.011 0.009 0.029 
CA_30 0.048 0.042 0.036 0.008 0.009 0.026 
C_30 0.040 0.039 0.027 0.004 -0.001 0.022 
O_30 0.044 0.042 0.030 0.005 0.006 0.026 
N_31 0.038 0.041 0.033 0.006 0.006 0.024 
CA_31 0.039 0.039 0.027 0.007 0.007 0.025 
CB_31 0.047 0.046 0.025 0.006 0.004 0.029 
CG_31 0.048 0.049 0.023 0.006 0.001 0.030 
CD1_31 0.049 0.047 0.035 0.002 -0.002 0.028 
CD2_31 0.051 0.047 0.041 0.001 -0.003 0.028 
CE1_31 0.060 0.060 0.039 0.005 -0.003 0.041 
CE2_31 0.049 0.058 0.049 0.005 -0.009 0.026 
CZ_31 0.051 0.068 0.042 0.009 -0.004 0.038 
C_31 0.040 0.040 0.024 0.008 0.002 0.026 
O_31 0.042 0.051 0.035 0.000 0.008 0.026 
N_32 0.041 0.041 0.026 0.005 0.008 0.026 
CA_32 0.043 0.042 0.027 0.006 0.008 0.026 
CB_32 0.050 0.046 0.031 -0.001 -0.003 0.029 
CG1_32 0.064 0.061 0.036 0.005 -0.004 0.041 
CG2_32 0.044 0.057 0.039 0.001 0.001 0.025 
C_32 0.038 0.038 0.026 0.003 0.005 0.021 
O_32 0.047 0.048 0.026 0.004 0.005 0.030 
N_33 0.044 0.046 0.027 0.002 0.003 0.028 
CA_33 0.044 0.040 0.031 0.006 0.006 0.025 
CB_33 0.049 0.042 0.036 0.004 0.000 0.029 
OG1_33 0.051 0.051 0.035 0.005 0.001 0.032 
CG2_33 0.047 0.053 0.051 0.010 0.005 0.029 
C_33 0.039 0.041 0.032 0.006 0.009 0.023 
O_33 0.052 0.047 0.031 0.001 0.002 0.029 
N_34 0.052 0.049 0.031 0.001 0.005 0.033 
CA_34 0.055 0.046 0.038 0.000 0.009 0.032 
CB_34 0.080 0.056 0.048 0.010 0.022 0.045 
C_34 0.050 0.047 0.037 0.001 0.005 0.031 
O_34 0.058 0.061 0.048 -0.006 0.012 0.027 
N_35 0.049 0.058 0.036 0.001 0.007 0.035 
CA_35 0.061 0.065 0.035 0.006 0.012 0.041 
C_35 0.049 0.058 0.038 0.000 0.010 0.030 
O_35 0.053 0.065 0.060 0.010 0.014 0.029 
N_36 0.043 0.054 0.043 -0.004 0.002 0.029 
CA_36 0.047 0.061 0.048 -0.003 0.005 0.034 
CB_36 0.055 0.063 0.047 -0.008 0.000 0.040 
CG_36 0.052 0.056 0.047 -0.005 -0.005 0.035 
CD2_36 0.056 0.067 0.051 -0.006 -0.004 0.035 
ND1_36 0.052 0.058 0.049 -0.009 -0.003 0.031 
CE1_36 0.054 0.059 0.058 -0.001 0.005 0.029 
NE2_36 0.062 0.067 0.053 0.000 -0.003 0.036 
C_36 0.049 0.058 0.056 -0.003 0.000 0.030 
O_36 0.055 0.096 0.081 -0.026 -0.016 0.048 
N_37 0.047 0.059 0.045 -0.006 0.000 0.028 
C_37 0.051 0.064 0.054 -0.010 -0.004 0.032 
O_37 0.059 0.077 0.060 -0.015 -0.010 0.031 
CA_37 0.059 0.058 0.048 -0.009 -0.003 0.030 
CA_37 0.050 0.069 0.034 -0.002 -0.008 0.036 
CA_37 0.063 0.057 0.047 -0.003 -0.011 0.033 
CB_37 0.055 0.077 0.048 -0.013 0.002 0.031 
CB_37 0.082 0.035 0.037 0.009 0.021 0.026 
CB_37 0.063 0.062 0.047 -0.014 0.004 0.015 
SG_37 0.065 0.075 0.047 -0.011 0.000 0.020 
SG1_37 0.071 0.067 0.040 -0.010 0.023 0.021 
SG1_37 0.100 0.111 0.114 0.058 0.016 0.041 
N_38 0.052 0.066 0.051 -0.004 0.002 0.023 
CA_38 0.053 0.076 0.061 -0.006 0.003 0.019 
CA_38 0.069 0.065 0.068 0.002 0.019 0.035 
C_38 0.063 0.061 0.063 -0.004 0.013 0.026 
C_38 0.072 0.084 0.065 0.001 0.013 0.022 
O_38 0.059 0.078 0.045 0.003 0.008 0.019 
O_38 0.136 0.090 0.066 -0.003 0.015 0.023 
N_39 0.057 0.084 0.065 0.001 0.009 0.028 
N_39 0.069 0.099 0.074 0.019 0.015 0.024 
CA_39 0.070 0.095 0.077 0.019 0.034 0.031 
CB_39 0.110 0.106 0.111 0.024 0.057 0.061 
OG1_39 0.073 0.126 0.173 0.031 0.036 0.050 
CG2_39 0.195 0.153 0.167 0.002 0.069 0.114 
C_39 0.053 0.097 0.064 0.007 0.020 0.032 
O_39 0.069 0.107 0.063 0.010 0.019 0.051 
N_40 0.067 0.113 0.060 0.008 0.013 0.034 
CA_40 0.064 0.129 0.066 0.024 0.016 0.049 
CB_40 0.089 0.155 0.066 0.023 0.007 0.053 
CG1_40 0.144 0.198 0.083 0.036 0.002 0.108 
CG2_40 0.098 0.215 0.103 0.028 -0.025 0.048 
C_40 0.065 0.113 0.064 0.023 0.023 0.050 
O_40 0.059 0.119 0.088 0.014 0.020 0.044 
N_41 0.071 0.114 0.067 0.026 0.018 0.055 
CA_41 0.096 0.101 0.078 0.023 0.013 0.058 
CB_41 0.128 0.100 0.104 0.033 0.027 0.036 
CG_41 0.219 0.138 0.108 0.052 0.032 0.065 
OD1_41 0.355 0.360 0.155 0.126 0.118 0.176 
ND2_41 0.334 0.219 0.137 0.089 0.015 0.180 
C_41 0.067 0.090 0.078 0.016 0.016 0.040 
O_41 0.091 0.090 0.109 0.020 0.008 0.032 
N_42 0.063 0.091 0.067 0.016 0.009 0.045 
CA_42 0.054 0.092 0.074 0.013 0.009 0.045 
CB_42 0.082 0.096 0.068 0.003 0.005 0.062 
C_42 0.045 0.072 0.075 0.011 0.005 0.032 
O_42 0.048 0.086 0.085 -0.004 -0.004 0.039 
N_43 0.052 0.097 0.074 0.008 0.003 0.047 
CA_43 0.053 0.074 0.075 0.007 0.003 0.034 
CB_43 0.056 0.084 0.093 0.011 0.002 0.022 
OG1_43 0.100 0.141 0.132 0.037 0.022 -0.003 
CG2_43 0.084 0.078 0.122 -0.009 -0.012 0.029 
C_43 0.045 0.065 0.070 0.004 -0.006 0.033 
O_43 0.054 0.078 0.076 0.008 0.001 0.042 
N_44 0.048 0.062 0.066 0.005 -0.001 0.033 
CA_44 0.045 0.059 0.060 0.000 -0.007 0.030 
CB_44 0.048 0.071 0.064 -0.005 -0.007 0.033 
C_44 0.044 0.058 0.065 -0.004 -0.009 0.029 
O_44 0.060 0.053 0.071 -0.003 -0.008 0.030 
N_45 0.050 0.054 0.066 -0.006 -0.011 0.029 
CA_45 0.057 0.057 0.063 -0.008 -0.016 0.027 
CB_45 0.070 0.069 0.080 -0.013 -0.027 0.040 
CG_45 0.058 0.064 0.102 -0.012 -0.022 0.030 
CD_45 0.066 0.090 0.125 -0.022 -0.031 0.041 
NE_45 0.048 0.080 0.188 -0.033 -0.034 0.024 
CZ_45 0.049 0.088 0.181 -0.007 -0.017 0.028 
NH1_45 0.057 0.099 0.131 0.006 -0.002 0.034 
NH2_45 0.064 0.094 0.259 0.004 -0.002 0.024 
C_45 0.067 0.055 0.065 -0.011 -0.018 0.033 
O_45 0.070 0.053 0.072 -0.004 -0.006 0.032 
N_46 0.083 0.053 0.055 -0.004 -0.011 0.033 
CA_46 0.110 0.070 0.046 -0.002 -0.004 0.051 
CA_46 0.104 0.061 0.068 -0.005 -0.001 0.034 
CB_46 0.114 0.059 0.055 0.002 0.017 0.048 
CG2_46 0.158 0.086 0.070 0.011 0.038 0.068 
CG1_46 0.082 0.068 0.068 0.007 0.011 0.045 
CD1_46 0.088 0.094 0.097 0.021 0.023 0.049 
C_46 0.119 0.096 0.060 -0.009 -0.009 0.056 
C_46 0.140 0.075 0.061 -0.003 0.000 0.054 
O_46 0.116 0.080 0.077 -0.024 -0.013 0.046 
O_46 0.068 0.060 0.070 -0.010 -0.002 0.021 
N_47 0.145 0.125 0.055 0.001 -0.028 0.056 
N_47 0.096 0.113 0.068 0.016 -0.009 0.051 
CA_47 0.200 0.173 0.070 -0.004 -0.049 0.024 
CA_47 0.119 0.121 0.071 0.014 0.013 0.027 
C_47 0.198 0.164 0.130 0.041 -0.090 0.006 
C_47 0.093 0.144 0.106 -0.011 -0.021 0.059 
O_47 0.315 0.210 0.152 0.003 -0.155 -0.023 
O_47 0.093 0.224 0.140 -0.092 -0.053 0.043 
N_48 0.136 0.200 0.198 0.097 -0.073 0.039 
N_48 0.096 0.160 0.102 0.022 -0.010 0.072 
CA_48 0.120 0.311 0.355 0.183 -0.091 0.049 
CA_48 0.095 0.151 0.128 0.025 -0.016 0.067 
C_48 0.106 0.192 0.209 0.066 -0.059 0.042 
C_48 0.136 0.091 0.068 -0.034 -0.036 0.039 
O_48 0.109 0.345 0.495 0.248 -0.067 0.030 
O_48 0.114 0.139 0.093 0.005 -0.048 0.040 
N_49 0.125 0.123 0.112 -0.002 -0.067 0.045 
N_49 0.156 0.130 0.135 0.013 -0.088 0.036 
CA_49 0.121 0.085 0.100 -0.023 -0.053 0.038 
CB_49 0.166 0.155 0.102 -0.058 -0.053 0.081 
C_49 0.080 0.070 0.100 -0.018 -0.042 0.036 
O_49 0.083 0.059 0.089 -0.011 -0.028 0.031 
N_50 0.068 0.063 0.106 -0.011 -0.036 0.025 
CA_50 0.063 0.060 0.092 -0.008 -0.020 0.027 
CB_50 0.060 0.068 0.127 -0.003 -0.005 0.024 
CG1_50 0.079 0.095 0.107 0.019 0.015 0.041 
CG2_50 0.070 0.099 0.144 -0.006 -0.004 0.038 
C_50 0.062 0.056 0.067 -0.002 -0.010 0.024 
O_50 0.069 0.056 0.100 -0.013 -0.016 0.030 
N_51 0.058 0.055 0.056 -0.001 -0.008 0.030 
CA_51 0.058 0.059 0.056 -0.003 -0.006 0.033 
CB_51 0.063 0.068 0.051 0.005 0.001 0.038 
CG1_51 0.079 0.078 0.053 0.005 0.000 0.044 
CG2_51 0.058 0.058 0.067 0.004 0.003 0.025 
C_51 0.047 0.056 0.060 0.006 0.001 0.024 
O_51 0.053 0.065 0.057 0.002 -0.002 0.034 
N_52 0.064 0.081 0.047 -0.003 -0.010 0.045 
CA_52 0.080 0.100 0.052 -0.004 -0.005 0.062 
C_52 0.052 0.061 0.054 0.008 0.004 0.032 
O_52 0.060 0.073 0.059 0.007 -0.002 0.042 
N_53 0.054 0.069 0.048 0.008 0.006 0.038 
CA_53 0.051 0.069 0.055 0.005 0.012 0.032 
CB_53 0.070 0.091 0.067 0.014 0.022 0.028 
OG1_53 0.119 0.138 0.097 0.045 0.023 0.068 
CG2_53 0.082 0.097 0.105 0.022 0.028 0.012 
C_53 0.049 0.072 0.045 0.010 0.012 0.034 
O_53 0.055 0.094 0.063 -0.009 -0.003 0.051 
N_54 0.042 0.069 0.055 0.010 0.007 0.033 
CA_54 0.041 0.074 0.041 0.012 0.008 0.030 
CB_54 0.052 0.076 0.043 0.005 0.010 0.036 
CG_54 0.047 0.073 0.044 0.003 0.008 0.037 
CD1_54 0.050 0.064 0.052 0.003 0.000 0.033 
CD2_54 0.051 0.074 0.046 0.003 0.001 0.032 
CE1_54 0.061 0.071 0.051 0.002 -0.004 0.041 
CE2_54 0.053 0.065 0.055 0.003 0.000 0.027 
CZ_54 0.062 0.067 0.051 0.009 0.006 0.039 
C_54 0.047 0.069 0.049 0.013 0.011 0.028 
O_54 0.059 0.116 0.062 0.039 0.023 0.045 
N_55 0.047 0.063 0.041 0.013 0.006 0.026 
CA_55 0.057 0.057 0.052 0.012 -0.002 0.026 
CB_55 0.093 0.097 0.072 -0.010 -0.019 0.068 
C_55 0.059 0.061 0.045 0.012 0.004 0.030 
O_55 0.089 0.076 0.050 0.021 0.010 0.031 
N_56 0.060 0.061 0.042 0.010 0.006 0.032 
CA_56 0.063 0.062 0.046 0.006 0.005 0.034 
CB_56 0.080 0.076 0.069 -0.006 -0.014 0.046 
C_56 0.055 0.057 0.054 0.008 0.010 0.028 
O_56 0.073 0.058 0.050 0.010 0.020 0.034 
N_57 0.066 0.063 0.049 0.011 0.022 0.036 
C_57 0.105 0.065 0.053 0.013 0.038 0.051 
O_57 0.142 0.073 0.065 0.013 0.061 0.050 
CA_57 0.084 0.063 0.053 0.009 0.020 0.043 
CA_57 0.070 0.067 0.048 0.016 0.044 0.037 
CB_57 0.091 0.109 0.072 0.034 0.040 0.071 
CB_57 0.120 0.075 0.060 0.022 0.033 0.067 
CG_57 0.112 0.148 0.106 0.039 0.060 0.090 
CG_57 0.073 0.132 0.082 -0.039 -0.021 0.059 
CD_57 0.174 0.226 0.183 0.121 0.140 0.160 
CD_57 0.117 0.179 0.030 -0.005 0.006 0.108 
NE_57 0.154 0.240 0.144 0.119 0.114 0.161 
NE_57 0.100 0.147 0.061 -0.021 -0.014 0.089 
CZ_57 0.079 0.096 0.069 -0.003 0.016 0.053 
CZ_57 0.075 0.103 0.076 -0.011 0.021 0.056 
NH1_57 0.102 0.239 0.092 0.070 0.047 0.106 
NH1_57 0.079 0.122 0.107 0.008 0.016 0.071 
NH2_57 0.092 0.190 0.117 0.011 0.038 0.099 
NH2_57 0.150 0.130 0.101 -0.015 0.049 0.079 
N_58 0.093 0.065 0.050 0.005 0.030 0.046 
CA_58 0.090 0.066 0.054 0.003 0.031 0.046 
CB_58 0.107 0.079 0.055 0.006 0.023 0.058 
CG1_58 0.096 0.094 0.065 -0.007 0.020 0.049 
CG2_58 0.113 0.095 0.083 0.004 0.006 0.061 
C_58 0.077 0.065 0.047 -0.002 0.022 0.041 
O_58 0.100 0.068 0.066 0.014 0.044 0.054 
N_59 0.072 0.063 0.049 0.000 0.022 0.038 
CA_59 0.069 0.060 0.047 -0.007 0.014 0.037 
CB_59 0.073 0.070 0.048 -0.016 0.004 0.036 
CG_59 0.063 0.069 0.048 -0.016 0.004 0.038 
CD1_59 0.061 0.087 0.059 -0.015 0.008 0.037 
CD2_59 0.063 0.069 0.048 -0.017 -0.005 0.040 
CE1_59 0.076 0.114 0.065 -0.018 -0.005 0.069 
CE2_59 0.074 0.068 0.053 -0.019 -0.011 0.041 
CZ_59 0.090 0.087 0.060 -0.020 -0.013 0.063 
C_59 0.057 0.070 0.054 -0.010 0.013 0.033 
O_59 0.064 0.074 0.079 -0.008 0.021 0.033 
N_60 0.058 0.069 0.052 -0.009 0.012 0.038 
CD_60 0.064 0.088 0.077 -0.018 0.019 0.044 
CA_60 0.061 0.069 0.048 -0.008 0.010 0.041 
CB_60 0.069 0.073 0.062 -0.017 -0.004 0.049 
CG_60 0.069 0.084 0.082 -0.027 0.004 0.047 
C_60 0.068 0.069 0.043 -0.010 0.012 0.043 
O_60 0.071 0.074 0.052 -0.005 0.010 0.045 
N_61 0.068 0.070 0.045 -0.011 0.003 0.045 
CA_61 0.075 0.082 0.045 -0.017 0.000 0.050 
C_61 0.071 0.077 0.035 -0.013 -0.008 0.048 
O_61 0.066 0.076 0.057 -0.018 -0.006 0.041 
N_62 0.067 0.074 0.036 -0.007 0.002 0.045 
CA_62 0.057 0.066 0.039 -0.006 0.000 0.040 
CB_62 0.074 0.079 0.047 -0.003 0.000 0.054 
CG_62 0.084 0.105 0.042 0.001 0.000 0.067 
OD1_62 0.113 0.135 0.069 0.032 -0.004 0.064 
ND2_62 0.084 0.111 0.050 -0.004 -0.011 0.057 
C_62 0.051 0.055 0.038 -0.003 0.003 0.033 
O_62 0.057 0.069 0.042 -0.011 -0.001 0.043 
N_63 0.048 0.058 0.041 -0.007 0.002 0.034 
CA_63 0.047 0.049 0.037 -0.006 0.001 0.031 
CB_63 0.053 0.045 0.042 -0.006 0.000 0.029 
CG_63 0.047 0.050 0.041 -0.002 0.005 0.031 
OD1_63 0.057 0.054 0.049 0.002 0.001 0.033 
OD2_63 0.047 0.052 0.048 -0.003 -0.001 0.028 
C_63 0.046 0.049 0.036 -0.003 0.002 0.030 
O_63 0.061 0.055 0.042 0.002 0.015 0.035 
N_64 0.050 0.051 0.037 -0.001 0.011 0.032 
CA_64 0.050 0.049 0.037 -0.001 0.010 0.031 
CB_64 0.050 0.052 0.047 -0.002 0.012 0.031 
CG_64 0.059 0.063 0.048 0.009 0.015 0.037 
CD_64 0.066 0.069 0.051 0.011 0.011 0.043 
NE_64 0.065 0.061 0.043 0.006 0.004 0.039 
CZ_64 0.066 0.082 0.044 0.009 0.007 0.052 
NH1_64 0.075 0.101 0.073 0.026 -0.002 0.058 
NH2_64 0.064 0.077 0.052 -0.002 -0.010 0.041 
C_64 0.047 0.050 0.036 0.006 0.011 0.029 
O_64 0.054 0.055 0.042 0.002 0.015 0.029 
N_65 0.050 0.048 0.035 0.003 0.015 0.026 
CA_65 0.047 0.045 0.036 0.004 0.010 0.025 
CB_65 0.056 0.054 0.054 0.002 0.007 0.035 
C_65 0.045 0.046 0.031 0.005 0.004 0.027 
O_65 0.051 0.048 0.033 0.005 0.014 0.028 
N_66 0.045 0.047 0.030 0.004 0.010 0.025 
CA_66 0.043 0.044 0.036 0.003 0.008 0.024 
CB_66 0.041 0.050 0.046 0.000 0.001 0.025 
CG_66 0.040 0.051 0.047 0.003 -0.003 0.025 
CD2_66 0.045 0.058 0.046 0.002 -0.006 0.032 
CE2_66 0.050 0.060 0.054 0.007 -0.007 0.032 
CE3_66 0.059 0.054 0.056 0.002 -0.008 0.033 
CD1_66 0.049 0.060 0.048 -0.004 -0.006 0.031 
NE1_66 0.059 0.068 0.044 0.005 -0.004 0.037 
CZ2_66 0.070 0.069 0.059 0.016 -0.004 0.043 
CZ3_66 0.074 0.061 0.062 -0.006 -0.016 0.041 
CH2_66 0.072 0.057 0.076 0.006 -0.011 0.037 
C_66 0.041 0.047 0.038 0.004 0.004 0.028 
O_66 0.041 0.057 0.038 0.004 0.008 0.023 
N_67 0.038 0.052 0.037 0.000 0.007 0.023 
CA_67 0.038 0.055 0.033 0.001 0.004 0.025 
CB_67 0.046 0.058 0.039 0.005 0.002 0.029 
CG1_67 0.057 0.072 0.047 0.007 -0.009 0.027 
CG2_67 0.076 0.084 0.052 0.012 0.008 0.059 
C_67 0.040 0.054 0.030 0.003 0.001 0.026 
O_67 0.048 0.057 0.044 0.006 0.010 0.031 
N_68 0.044 0.058 0.038 0.006 0.007 0.029 
C_68 0.045 0.049 0.051 0.010 0.002 0.028 
O_68 0.049 0.073 0.063 -0.002 -0.001 0.035 
CA_68 0.064 0.060 0.038 0.011 -0.005 0.037 
CA_68 0.047 0.056 0.045 0.008 0.001 0.030 
CB_68 0.082 0.065 0.044 0.012 0.006 0.034 
CB_68 0.067 0.071 0.044 0.013 0.005 0.042 
OG_68 0.085 0.104 0.047 0.011 0.013 0.028 
OG_68 0.126 0.087 0.055 0.025 0.016 0.075 
N_69 0.052 0.074 0.034 0.007 0.002 0.038 
CA_69 0.052 0.060 0.042 0.006 0.001 0.030 
CB_69 0.061 0.062 0.041 0.004 0.005 0.036 
CG_69 0.050 0.059 0.042 0.003 0.000 0.026 
CD1_69 0.064 0.066 0.048 0.006 0.009 0.031 
CD2_69 0.064 0.058 0.073 0.008 -0.009 0.029 
C_69 0.059 0.069 0.048 0.010 0.002 0.030 
O_69 0.087 0.071 0.069 0.021 -0.001 0.046 
N_70 0.071 0.061 0.054 0.012 0.004 0.034 
CA_70 0.080 0.058 0.065 0.016 0.014 0.025 
CB_70 0.085 0.061 0.075 0.005 0.014 0.018 
OG1_70 0.097 0.079 0.080 0.007 -0.004 0.011 
CG2_70 0.080 0.109 0.104 0.000 0.001 0.030 
C_70 0.089 0.063 0.066 0.016 0.013 0.035 
O_70 0.082 0.061 0.070 0.017 0.019 0.034 
N_71 0.124 0.078 0.110 0.043 0.055 0.057 
C_71 0.131 0.061 0.152 0.034 0.069 0.047 
O_71 0.146 0.091 0.166 0.020 0.069 0.065 
CA_71 0.148 0.107 0.145 0.077 0.070 0.088 
CA_71 0.154 0.111 0.148 0.051 0.059 0.092 
CB_71 0.220 0.158 0.258 0.112 0.050 0.142 
CB_71 0.282 0.203 0.234 0.126 0.143 0.195 
OG_71 0.214 0.243 0.244 0.170 0.085 0.185 
OG_71 0.316 0.114 0.522 0.095 0.196 0.109 
N_72 0.123 0.051 0.137 0.002 0.053 0.022 
CA_72 0.140 0.057 0.141 -0.019 0.043 0.006 
CB_72 0.151 0.098 0.170 -0.023 0.012 -0.005 
C_72 0.113 0.070 0.087 -0.019 0.024 0.022 
O_72 0.197 0.088 0.095 -0.033 0.026 0.030 
N_73 0.080 0.053 0.066 -0.007 0.017 0.022 
CA_73 0.069 0.060 0.057 -0.002 0.012 0.031 
CB_73 0.067 0.056 0.049 0.001 0.008 0.028 
CG_73 0.076 0.065 0.055 0.000 0.011 0.040 
CD_73 0.079 0.071 0.048 0.003 0.012 0.044 
OE1_73 0.088 0.088 0.057 0.007 0.011 0.052 
NE2_73 0.078 0.084 0.069 0.004 0.004 0.041 
C_73 0.071 0.059 0.051 -0.001 0.004 0.034 
O_73 0.092 0.093 0.072 0.036 0.024 0.057 
N_74 0.058 0.053 0.048 0.000 0.002 0.030 
CA_74 0.064 0.057 0.042 -0.001 0.003 0.036 
CB_74 0.083 0.062 0.047 -0.010 0.006 0.034 
OG1_74 0.130 0.074 0.066 -0.023 0.013 0.016 
CG2_74 0.106 0.093 0.081 -0.004 0.033 0.054 
C_74 0.059 0.049 0.038 0.002 0.006 0.033 
O_74 0.075 0.052 0.050 0.004 -0.001 0.039 
N_75 0.063 0.044 0.041 0.007 0.006 0.030 
CA_75 0.059 0.044 0.037 0.005 0.009 0.026 
CB_75 0.059 0.053 0.032 0.002 0.008 0.030 
CG_75 0.064 0.053 0.037 0.006 0.012 0.025 
CD1_75 0.079 0.116 0.034 0.009 0.011 0.034 
CD2_75 0.110 0.087 0.077 0.024 0.053 0.062 
C_75 0.061 0.052 0.028 0.004 0.005 0.033 
O_75 0.090 0.059 0.060 0.014 0.033 0.045 
N_76 0.063 0.045 0.037 0.004 0.012 0.028 
CA_76 0.056 0.056 0.033 0.004 0.008 0.034 
CB_76 0.054 0.058 0.036 0.005 0.007 0.029 
CG_76 0.059 0.065 0.035 -0.001 0.005 0.028 
CD1_76 0.077 0.092 0.055 -0.012 -0.012 0.052 
CD2_76 0.080 0.070 0.038 -0.001 0.002 0.042 
C_76 0.055 0.055 0.027 0.010 0.007 0.034 
O_76 0.053 0.054 0.030 0.004 0.007 0.031 
N_77 0.055 0.053 0.031 0.010 0.005 0.034 
CD_77 0.066 0.062 0.052 0.010 0.011 0.043 
CA_77 0.048 0.064 0.029 0.006 0.000 0.034 
CB_77 0.059 0.081 0.044 0.018 0.002 0.048 
CG_77 0.071 0.072 0.064 0.018 0.016 0.052 
C_77 0.048 0.047 0.026 -0.005 -0.003 0.026 
O_77 0.046 0.053 0.038 0.000 0.000 0.024 
N_78 0.048 0.046 0.027 0.003 0.001 0.029 
C_78 0.041 0.051 0.032 0.003 -0.002 0.026 
O_78 0.044 0.063 0.061 0.020 0.008 0.031 
CA_78 0.053 0.044 0.030 0.003 0.005 0.030 
CA_78 0.084 0.045 0.018 0.002 0.003 0.042 
CB_78 0.019 0.050 0.033 0.011 0.003 0.018 
CB_78 0.249 0.088 0.018 -0.007 -0.009 0.117 
CG_78 0.286 0.054 0.030 0.002 0.025 0.077 
CG_78 0.041 0.085 0.043 -0.020 -0.019 0.057 
CD_78 0.084 0.071 0.041 -0.021 -0.006 0.020 
CD_78 0.066 0.057 0.014 0.009 -0.001 0.038 
NE_78 0.072 0.070 0.055 0.011 -0.019 0.014 
NE_78 0.051 0.053 0.032 -0.015 -0.001 0.024 
CZ_78 0.060 0.075 0.051 0.012 -0.031 0.008 
CZ_78 0.079 0.064 0.027 -0.010 0.001 0.047 
NH1_78 0.067 0.070 0.046 0.010 -0.012 0.016 
NH1_78 0.059 0.072 0.051 -0.014 -0.003 0.045 
NH2_78 0.072 0.087 0.117 0.031 -0.026 0.016 
NH2_78 0.088 0.060 0.060 -0.013 -0.021 0.046 
N_79 0.042 0.050 0.036 0.005 0.003 0.031 
CA_79 0.043 0.051 0.031 0.005 0.003 0.033 
CB_79 0.042 0.055 0.036 0.002 0.001 0.032 
CG1_79 0.054 0.054 0.038 -0.001 -0.005 0.036 
CG2_79 0.051 0.068 0.036 0.003 -0.003 0.041 
C_79 0.042 0.046 0.031 0.003 0.002 0.028 
O_79 0.051 0.072 0.031 0.007 0.005 0.039 
N_80 0.043 0.050 0.027 0.005 0.002 0.028 
CA_80 0.052 0.053 0.026 0.001 -0.004 0.034 
CB_80 0.051 0.063 0.044 0.004 -0.007 0.031 
C_80 0.049 0.051 0.030 -0.001 -0.003 0.034 
O_80 0.062 0.054 0.031 -0.001 0.002 0.035 
N_81 0.065 0.051 0.028 0.003 0.004 0.039 
CA_81 0.063 0.054 0.030 0.003 0.000 0.036 
CB_81 0.063 0.072 0.036 0.004 -0.002 0.034 
CG_81 0.070 0.091 0.046 0.008 -0.008 0.015 
OD1_81 0.120 0.065 0.052 0.012 0.006 0.037 
ND2_81 0.062 0.215 0.166 0.105 0.009 0.022 
C_81 0.064 0.045 0.029 0.005 0.001 0.034 
O_81 0.076 0.062 0.028 0.002 0.001 0.047 
N_82 0.072 0.057 0.037 -0.004 -0.004 0.044 
CA_82 0.074 0.057 0.043 -0.005 -0.011 0.043 
C_82 0.069 0.056 0.042 -0.001 -0.008 0.036 
O_82 0.097 0.061 0.053 0.006 0.009 0.036 
N_83 0.082 0.051 0.038 -0.002 -0.009 0.039 
C_83 0.123 0.059 0.056 -0.013 -0.009 0.058 
O_83 0.181 0.071 0.120 -0.027 -0.019 0.080 
CA_83 0.101 0.060 0.057 -0.019 -0.013 0.047 
CA_83 0.102 0.050 0.044 -0.008 -0.014 0.033 
CB_83 0.130 0.118 0.072 -0.050 -0.029 0.081 
CB_83 0.228 0.077 0.063 -0.023 -0.065 0.078 
OG_83 0.163 0.122 0.110 -0.062 -0.085 0.100 
OG_83 0.476 0.093 0.036 -0.004 0.027 0.058 
N_84 0.114 0.067 0.039 -0.002 -0.007 0.069 
C_84 0.087 0.050 0.038 0.002 0.001 0.047 
O_84 0.090 0.065 0.039 0.002 0.000 0.057 
CA_84 0.135 0.110 0.048 0.015 0.015 0.111 
CA_84 0.099 0.044 0.044 -0.022 -0.022 0.041 
CB_84 0.133 0.208 0.094 0.101 0.076 0.142 
CB_84 0.087 0.046 0.038 -0.018 -0.015 0.053 
OG_84 0.122 0.146 0.059 0.027 0.017 0.108 
OG_84 0.212 0.180 0.053 0.044 0.020 0.139 
N_85 0.068 0.060 0.036 0.003 0.008 0.037 
CA_85 0.059 0.069 0.033 0.008 0.004 0.034 
CB_85 0.072 0.073 0.049 0.016 0.000 0.038 
CG_85 0.074 0.057 0.045 0.014 0.001 0.038 
CD1_85 0.075 0.056 0.042 0.005 0.000 0.038 
CD2_85 0.090 0.059 0.054 0.014 0.017 0.047 
CE1_85 0.064 0.050 0.057 0.006 0.002 0.026 
CE2_85 0.106 0.050 0.045 0.002 0.003 0.037 
CZ_85 0.085 0.052 0.059 0.008 -0.014 0.024 
C_85 0.059 0.073 0.038 0.009 0.013 0.037 
O_85 0.061 0.113 0.049 -0.007 0.013 0.035 
N_86 0.047 0.064 0.037 0.005 0.004 0.034 
CA_86 0.045 0.061 0.043 0.006 0.006 0.031 
CB_86 0.056 0.058 0.069 -0.002 0.000 0.036 
CG1_86 0.063 0.069 0.076 -0.012 -0.001 0.035 
CG2_86 0.112 0.065 0.104 0.005 -0.024 0.049 
C_86 0.039 0.054 0.035 -0.002 0.003 0.027 
O_86 0.048 0.073 0.042 0.012 0.011 0.040 
N_87 0.047 0.060 0.033 0.002 0.005 0.034 
CA_87 0.041 0.057 0.035 -0.003 0.000 0.030 
CB_87 0.052 0.070 0.034 -0.010 -0.001 0.040 
OG1_87 0.062 0.082 0.037 -0.016 -0.007 0.049 
CG2_87 0.071 0.077 0.044 -0.008 -0.004 0.055 
C_87 0.044 0.049 0.037 -0.003 0.002 0.028 
O_87 0.054 0.060 0.038 -0.001 0.007 0.024 
N_88 0.041 0.051 0.034 -0.005 0.001 0.027 
CA_88 0.044 0.052 0.029 -0.002 0.002 0.029 
CB_88 0.043 0.054 0.037 0.001 0.009 0.029 
CG1_88 0.053 0.071 0.037 0.000 0.008 0.035 
CG2_88 0.043 0.059 0.050 -0.005 0.003 0.032 
C_88 0.047 0.057 0.033 -0.003 0.004 0.033 
O_88 0.059 0.059 0.054 -0.005 -0.003 0.039 
N_89 0.046 0.062 0.047 -0.001 0.001 0.037 
CA_89 0.042 0.097 0.051 0.001 0.008 0.044 
CA_89 0.054 0.039 0.061 -0.012 -0.010 0.034 
CB_89 0.046 0.091 0.059 -0.003 0.004 0.039 
CB_89 0.057 0.075 0.082 0.008 0.012 0.053 
CG_89 0.042 0.098 0.048 0.001 0.002 0.049 
CG_89 0.110 0.142 0.085 0.001 0.031 0.049 
CD_89 0.046 0.100 0.049 -0.004 0.000 0.036 
CD_89 0.089 0.285 0.098 0.051 0.022 0.088 
NE_89 0.049 0.119 0.054 0.003 0.012 0.047 
NE_89 0.087 0.254 0.218 0.085 0.017 0.066 
CZ_89 0.055 0.120 0.059 -0.010 0.004 0.047 
CZ_89 0.109 0.172 0.139 0.025 0.024 0.089 
NH1_89 0.055 0.174 0.065 -0.023 -0.005 0.064 
NH1_89 0.138 0.206 0.203 0.052 0.060 0.124 
NH2_89 0.059 0.121 0.069 -0.020 -0.007 0.042 
NH2_89 0.205 0.235 0.161 -0.042 0.071 0.130 
C_89 0.050 0.073 0.062 -0.002 -0.002 0.043 
O_89 0.091 0.130 0.066 -0.014 -0.016 0.090 
N_90 0.056 0.081 0.049 -0.004 -0.007 0.051 
CA_90 0.061 0.077 0.052 -0.002 -0.010 0.048 
C_90 0.042 0.061 0.040 0.007 0.000 0.030 
O_90 0.046 0.063 0.043 0.004 -0.003 0.038 
N_91 0.043 0.063 0.044 0.003 -0.003 0.033 
CA_91 0.038 0.070 0.045 -0.001 -0.003 0.029 
CB_91 0.052 0.086 0.074 -0.011 0.012 0.019 
OG_91 0.118 0.103 0.055 0.020 0.008 0.037 
C_91 0.041 0.070 0.037 0.005 0.000 0.033 
O_91 0.044 0.074 0.045 -0.005 -0.002 0.031 
N_92 0.038 0.065 0.045 0.002 0.001 0.028 
CA_92 0.039 0.071 0.047 0.002 -0.002 0.028 
CB_92 0.039 0.075 0.055 0.002 0.002 0.030 
OG1_92 0.046 0.093 0.072 -0.003 -0.002 0.046 
CG2_92 0.039 0.088 0.082 -0.008 0.001 0.025 
C_92 0.032 0.063 0.046 0.000 0.001 0.021 
O_92 0.053 0.073 0.048 -0.003 -0.005 0.036 
N_93 0.043 0.074 0.044 -0.001 0.000 0.030 
CA_93 0.052 0.076 0.051 -0.008 0.010 0.032 
CA_93 0.036 0.076 0.047 -0.013 -0.032 0.032 
CB_93 0.059 0.074 0.045 -0.005 -0.002 0.040 
CB_93 0.083 0.093 0.068 -0.011 0.017 0.041 
CG_93 0.078 0.086 0.065 -0.007 0.006 0.056 
CG_93 0.054 0.082 0.084 -0.020 -0.001 0.026 
CD_93 0.089 0.097 0.055 0.003 0.008 0.061 
CD_93 0.097 0.082 0.079 0.019 0.024 0.057 
OE1_93 0.142 0.117 0.085 0.009 0.037 0.083 
OE1_93 0.147 0.096 0.050 -0.008 0.009 0.062 
OE2_93 0.095 0.109 0.063 -0.025 -0.007 0.069 
OE2_93 0.108 0.127 0.069 0.005 0.026 0.058 
C_93 0.046 0.074 0.052 -0.013 -0.006 0.030 
O_93 0.048 0.091 0.088 0.003 -0.015 0.027 
N_94 0.039 0.072 0.050 -0.009 0.000 0.028 
CA_94 0.042 0.070 0.058 -0.009 0.003 0.028 
CB_94 0.064 0.075 0.054 -0.005 0.000 0.036 
C_94 0.047 0.073 0.059 -0.007 0.004 0.028 
O_94 0.058 0.085 0.077 -0.018 0.013 0.032 
N_95 0.047 0.075 0.070 -0.016 0.005 0.025 
CA_95 0.055 0.080 0.065 -0.013 0.000 0.026 
CB_95 0.063 0.095 0.090 -0.030 -0.013 0.029 
C_95 0.048 0.067 0.080 -0.017 0.001 0.016 
O_95 0.068 0.077 0.075 -0.015 -0.002 0.029 
N_96 0.062 0.075 0.079 -0.015 -0.001 0.028 
CA_96 0.055 0.078 0.094 -0.024 -0.008 0.026 
CB_96 0.068 0.082 0.124 -0.033 -0.018 0.035 
CG1_96 0.138 0.100 0.138 -0.036 -0.027 0.067 
CG2_96 0.093 0.116 0.133 -0.047 0.002 0.051 
C_96 0.052 0.074 0.103 -0.012 -0.011 0.017 
O_96 0.052 0.099 0.124 -0.009 -0.005 0.020 
N_97 0.053 0.075 0.113 0.001 -0.001 0.016 
CA_97 0.072 0.092 0.111 0.015 0.001 0.023 
C_97 0.064 0.097 0.102 0.020 0.004 0.012 
O_97 0.128 0.112 0.108 0.021 0.024 0.013 
N_98 0.057 0.094 0.082 0.006 0.003 0.029 
CA_98 0.051 0.115 0.076 0.010 0.010 0.043 
CB_98 0.088 0.115 0.074 0.003 0.001 0.072 
C_98 0.050 0.080 0.074 0.020 0.012 0.030 
O_98 0.057 0.101 0.088 0.022 0.010 0.044 
N_99 0.039 0.091 0.080 0.018 0.005 0.027 
CA_99 0.043 0.077 0.080 0.018 -0.001 0.023 
CB_99 0.057 0.102 0.080 0.020 0.002 0.025 
C_99 0.046 0.083 0.091 0.024 0.006 0.030 
O_99 0.050 0.100 0.148 0.052 0.001 0.036 
N_100 0.043 0.063 0.082 0.014 -0.002 0.025 
CA_100 0.044 0.060 0.067 0.010 0.004 0.026 
CB_100 0.049 0.068 0.071 0.004 -0.005 0.025 
CG1_100 0.057 0.073 0.080 0.000 0.008 0.028 
CG2_100 0.064 0.081 0.070 0.015 0.002 0.038 
C_100 0.043 0.057 0.072 0.016 0.005 0.024 
O_100 0.054 0.055 0.097 0.013 -0.012 0.023 
N_101 0.043 0.053 0.061 0.013 0.006 0.025 
CA_101 0.045 0.051 0.055 0.011 0.008 0.021 
C_101 0.042 0.048 0.041 0.007 0.004 0.025 
O_101 0.045 0.066 0.060 0.025 0.006 0.033 
CB_101 0.061 0.072 0.074 -0.001 0.029 0.022 
SG_101 0.077 0.089 0.091 0.008 0.040 0.031 
N_102 0.043 0.047 0.033 0.007 -0.001 0.018 
CA_102 0.038 0.042 0.031 0.004 -0.001 0.018 
CB_102 0.045 0.047 0.031 0.002 -0.001 0.022 
CG_102 0.050 0.047 0.044 0.001 -0.002 0.024 
CD_102 0.060 0.049 0.037 -0.004 -0.009 0.032 
NE_102 0.053 0.052 0.035 0.003 0.000 0.029 
CZ_102 0.046 0.048 0.042 0.001 0.001 0.030 
NH1_102 0.059 0.050 0.038 0.003 -0.004 0.027 
NH2_102 0.057 0.048 0.042 0.000 -0.006 0.028 
C_102 0.044 0.048 0.029 0.003 0.000 0.026 
O_102 0.061 0.050 0.033 0.006 -0.006 0.018 
N_103 0.041 0.043 0.027 0.000 -0.003 0.023 
CA_103 0.041 0.042 0.025 -0.001 -0.004 0.024 
CB_103 0.046 0.049 0.034 -0.004 -0.003 0.031 
OG_103 0.049 0.051 0.038 -0.009 -0.001 0.028 
C_103 0.043 0.038 0.027 -0.002 -0.002 0.025 
O_103 0.043 0.053 0.027 0.002 -0.002 0.027 
N_104 0.039 0.047 0.030 0.003 -0.002 0.026 
CA_104 0.043 0.051 0.035 -0.001 -0.004 0.031 
C_104 0.047 0.049 0.039 -0.005 -0.008 0.033 
O_104 0.053 0.072 0.038 0.007 -0.003 0.036 
N_105 0.042 0.048 0.041 0.000 -0.008 0.027 
CA_105 0.044 0.058 0.050 -0.003 -0.010 0.032 
CA_105 0.060 0.043 0.043 -0.015 -0.022 0.026 
CB_105 0.051 0.055 0.063 -0.003 -0.016 0.026 
CB_105 0.050 0.065 0.060 -0.002 -0.030 0.026 
CG_105 0.046 0.052 0.064 -0.002 -0.015 0.026 
CG_105 0.053 0.087 0.082 -0.021 -0.025 0.038 
CD_105 0.046 0.066 0.086 0.000 -0.010 0.031 
CD_105 0.082 0.071 0.081 0.007 -0.009 0.040 
NE_105 0.054 0.070 0.095 0.000 -0.019 0.037 
NE_105 0.077 0.094 0.086 0.013 0.007 0.044 
CZ_105 0.063 0.098 0.111 0.013 -0.026 0.045 
CZ_105 0.071 0.083 0.101 0.009 0.008 0.037 
NH1_105 0.084 0.109 0.141 0.007 -0.052 0.049 
NH1_105 0.058 0.114 0.117 0.016 0.021 0.047 
NH2_105 0.090 0.095 0.183 0.020 -0.039 0.059 
NH2_105 0.079 0.135 0.099 0.009 0.000 0.058 
C_105 0.056 0.062 0.045 -0.003 -0.014 0.035 
O_105 0.092 0.078 0.066 -0.013 -0.044 0.050 
N_106 0.050 0.057 0.045 0.003 -0.013 0.034 
CA_106 0.057 0.059 0.055 0.003 -0.014 0.039 
CB_106 0.067 0.066 0.062 0.013 0.003 0.047 
OG1_106 0.074 0.071 0.098 0.024 0.027 0.045 
CG2_106 0.081 0.081 0.086 0.019 0.004 0.059 
C_106 0.063 0.066 0.047 0.008 -0.008 0.041 
O_106 0.078 0.098 0.057 0.024 -0.021 0.037 
N_107 0.061 0.060 0.037 0.007 -0.004 0.038 
CA_107 0.062 0.066 0.040 0.012 -0.004 0.038 
CB_107 0.066 0.061 0.051 0.016 0.000 0.034 
OG1_107 0.061 0.077 0.044 0.008 -0.004 0.037 
CG2_107 0.081 0.063 0.059 0.009 -0.004 0.044 
C_107 0.064 0.077 0.036 0.009 0.000 0.041 
O_107 0.079 0.088 0.069 0.019 0.019 0.046 
N_108 0.061 0.069 0.041 0.004 -0.002 0.040 
CA_108 0.067 0.087 0.039 -0.003 -0.005 0.050 
C_108 0.065 0.066 0.035 -0.001 -0.005 0.042 
O_108 0.070 0.099 0.034 -0.006 -0.005 0.055 
N_109 0.065 0.076 0.029 -0.005 -0.005 0.044 
CA_109 0.059 0.068 0.034 0.000 -0.003 0.037 
CB_109 0.061 0.075 0.044 -0.013 -0.008 0.039 
CG_109 0.059 0.067 0.048 -0.012 -0.001 0.038 
CD1_109 0.073 0.093 0.060 0.003 0.009 0.040 
CE1_109 0.056 0.094 0.126 -0.025 0.007 0.034 
CD2_109 0.071 0.060 0.073 -0.003 -0.013 0.030 
CE2_109 0.109 0.078 0.091 -0.013 -0.038 0.056 
CZ_109 0.085 0.084 0.138 -0.047 -0.043 0.058 
OH_109 0.120 0.138 0.264 -0.117 -0.113 0.104 
C_109 0.071 0.070 0.034 0.005 0.003 0.040 
O_109 0.132 0.076 0.037 0.010 0.003 0.044 
N_110 0.064 0.055 0.036 0.008 0.000 0.029 
CA_110 0.068 0.054 0.042 0.013 0.005 0.028 
CB_110 0.072 0.057 0.058 -0.001 0.004 0.029 
CG_110 0.078 0.069 0.072 0.010 0.005 0.042 
CD_110 0.095 0.092 0.088 0.030 0.013 0.047 
OE1_110 0.114 0.105 0.142 0.065 0.029 0.051 
NE2_110 0.125 0.154 0.086 0.058 -0.009 0.040 
C_110 0.071 0.053 0.046 0.011 0.003 0.028 
O_110 0.071 0.060 0.052 0.020 -0.007 0.016 
N_111 0.071 0.063 0.047 0.019 0.001 0.020 
CA_111 0.065 0.057 0.061 0.013 0.001 0.019 
C_111 0.061 0.064 0.062 0.021 0.003 0.023 
O_111 0.105 0.061 0.092 0.019 -0.027 0.029 
CB_111 0.082 0.085 0.089 0.008 0.018 0.028 
SG_111 0.110 0.089 0.081 0.009 0.028 0.038 
N_112 0.056 0.060 0.063 0.015 0.001 0.026 
CA_112 0.060 0.060 0.070 0.011 -0.005 0.026 
C_112 0.053 0.056 0.065 0.015 0.003 0.020 
O_112 0.056 0.069 0.072 0.010 0.000 0.030 
N_113 0.065 0.077 0.069 0.007 -0.005 0.036 
C_113 0.047 0.074 0.075 0.000 -0.006 0.022 
O_113 0.060 0.113 0.073 0.009 0.000 0.049 
CA_113 0.044 0.066 0.067 0.001 -0.004 0.014 
CA_113 0.065 0.095 0.062 0.004 -0.003 0.040 
CB_113 0.057 0.067 0.096 0.006 0.006 0.025 
CB_113 0.062 0.099 0.091 0.014 0.007 0.026 
OG1_113 0.077 0.065 0.112 0.009 0.004 0.026 
OG1_113 0.122 0.118 0.088 0.025 0.012 0.027 
CG2_113 0.067 0.092 0.088 0.012 0.021 0.008 
CG2_113 0.073 0.154 0.102 0.015 -0.001 0.017 
N_114 0.050 0.080 0.067 0.002 -0.001 0.032 
CA_114 0.044 0.077 0.064 0.002 0.000 0.024 
CB_114 0.048 0.073 0.075 0.005 -0.004 0.022 
CG2_114 0.056 0.086 0.079 0.015 0.001 0.027 
CG1_114 0.084 0.071 0.115 0.007 -0.002 0.030 
CD1_114 0.098 0.096 0.236 0.020 -0.007 0.053 
C_114 0.049 0.072 0.071 0.006 0.001 0.023 
O_114 0.048 0.081 0.097 -0.001 0.004 0.017 
N_115 0.050 0.070 0.077 0.001 -0.001 0.019 
CA_115 0.069 0.068 0.085 -0.002 0.002 0.025 
CB_115 0.095 0.092 0.106 0.004 0.002 0.050 
OG1_115 0.089 0.121 0.123 0.024 0.009 0.059 
CG2_115 0.103 0.105 0.116 0.026 0.003 0.051 
C_115 0.063 0.062 0.089 -0.004 0.001 0.020 
O_115 0.095 0.067 0.098 -0.008 0.009 0.013 
N_116 0.062 0.062 0.078 -0.013 -0.008 0.026 
CA_116 0.060 0.060 0.077 -0.014 -0.006 0.019 
CB_116 0.093 0.071 0.093 -0.008 0.006 0.041 
C_116 0.049 0.062 0.075 -0.017 -0.009 0.023 
O_116 0.057 0.065 0.075 -0.013 -0.018 0.021 
N_117 0.053 0.063 0.071 -0.019 -0.009 0.017 
CA_117 0.050 0.067 0.066 -0.020 -0.012 0.023 
CB_117 0.059 0.088 0.062 -0.017 -0.004 0.036 
CG_117 0.057 0.074 0.069 -0.016 -0.002 0.027 
CD_117 0.094 0.123 0.071 -0.021 0.004 0.068 
CE_117 0.081 0.087 0.078 -0.019 0.013 0.038 
NZ_117 0.129 0.147 0.094 -0.028 0.011 0.093 
C_117 0.049 0.070 0.073 -0.020 -0.011 0.025 
O_117 0.069 0.067 0.093 -0.033 -0.007 0.026 
N_118 0.054 0.070 0.064 -0.025 -0.009 0.030 
CA_118 0.054 0.084 0.068 -0.024 -0.006 0.032 
CB_118 0.082 0.134 0.072 -0.033 -0.020 0.059 
CG_118 0.114 0.173 0.078 -0.037 -0.019 0.061 
OD1_118 0.181 0.174 0.097 -0.031 0.015 0.014 
ND2_118 0.159 0.261 0.103 -0.081 -0.038 0.062 
C_118 0.058 0.069 0.071 -0.027 -0.006 0.028 
O_118 0.084 0.104 0.084 -0.050 -0.014 0.049 
N_119 0.050 0.071 0.073 -0.034 -0.011 0.030 
CA_119 0.055 0.059 0.078 -0.027 -0.007 0.026 
CB_119 0.075 0.075 0.077 -0.020 -0.003 0.037 
CG1_119 0.109 0.099 0.099 -0.019 -0.012 0.064 
CG2_119 0.094 0.106 0.095 -0.004 0.019 0.039 
C_119 0.062 0.062 0.077 -0.026 -0.009 0.037 
O_119 0.056 0.064 0.091 -0.022 0.001 0.031 
N_120 0.054 0.062 0.109 -0.033 0.001 0.026 
CA_120 0.063 0.078 0.099 -0.030 0.000 0.039 
CB_120 0.077 0.108 0.104 -0.040 0.006 0.049 
OG1_120 0.084 0.162 0.102 -0.057 -0.008 0.065 
CG2_120 0.086 0.174 0.126 -0.058 0.011 0.070 
C_120 0.066 0.066 0.114 -0.022 0.003 0.035 
O_120 0.082 0.077 0.158 -0.003 0.001 0.043 
N_121 0.060 0.077 0.081 -0.006 0.010 0.037 
CA_121 0.064 0.081 0.072 0.002 0.013 0.040 
CB_121 0.078 0.129 0.083 -0.029 0.001 0.064 
C_121 0.065 0.076 0.070 -0.007 0.004 0.041 
O_121 0.095 0.104 0.100 0.028 0.041 0.070 
N_122 0.057 0.069 0.076 -0.004 0.007 0.035 
CA_122 0.061 0.075 0.076 -0.010 0.008 0.040 
CB_122 0.082 0.078 0.129 -0.026 0.016 0.041 
CG_122 0.112 0.119 0.148 -0.074 -0.002 0.045 
OD1_122 0.142 0.218 0.141 -0.087 -0.041 0.107 
ND2_122 0.151 0.153 0.273 -0.084 -0.007 -0.029 
C_122 0.061 0.071 0.078 -0.009 -0.001 0.042 
O_122 0.102 0.088 0.131 -0.005 -0.026 0.059 
N_123 0.064 0.073 0.067 -0.016 -0.005 0.046 
CA_123 0.057 0.069 0.070 -0.018 -0.007 0.040 
CB_123 0.067 0.071 0.072 -0.013 -0.004 0.044 
CG_123 0.065 0.067 0.057 -0.013 -0.004 0.041 
CD1_123 0.070 0.071 0.054 -0.005 0.000 0.045 
CE1_123 0.072 0.070 0.052 -0.006 0.001 0.048 
CD2_123 0.095 0.088 0.067 0.000 0.003 0.066 
CE2_123 0.110 0.083 0.071 0.009 0.015 0.067 
CZ_123 0.076 0.069 0.054 -0.008 0.004 0.046 
OH_123 0.097 0.072 0.067 -0.002 0.022 0.054 
C_123 0.067 0.073 0.063 -0.021 -0.007 0.043 
O_123 0.065 0.083 0.082 -0.030 -0.009 0.045 
N_124 0.061 0.089 0.075 -0.018 -0.011 0.050 
CA_124 0.065 0.091 0.070 -0.018 -0.007 0.050 
CB_124 0.067 0.124 0.085 -0.021 -0.014 0.061 
C_124 0.051 0.088 0.083 -0.030 -0.009 0.043 
O_124 0.068 0.089 0.081 -0.026 -0.004 0.048 
N_125 0.055 0.082 0.070 -0.021 -0.004 0.044 
CA_125 0.048 0.076 0.074 -0.026 0.001 0.034 
CB_125 0.067 0.071 0.084 -0.026 0.007 0.034 
CG_125 0.065 0.110 0.135 -0.065 -0.009 0.038 
CD_125 0.129 0.174 0.085 -0.061 -0.021 0.108 
OE1_125 0.131 0.127 0.087 -0.028 -0.005 0.096 
OE2_125 0.169 0.335 0.142 -0.141 -0.074 0.167 
C_125 0.058 0.064 0.067 -0.013 0.012 0.037 
O_125 0.061 0.071 0.079 -0.024 0.003 0.037 
N_126 0.053 0.072 0.063 -0.015 -0.001 0.037 
CA_126 0.057 0.070 0.063 -0.022 -0.001 0.037 
C_126 0.058 0.068 0.063 -0.022 -0.004 0.041 
O_126 0.062 0.091 0.060 -0.023 -0.002 0.043 
N_127 0.055 0.071 0.057 -0.022 0.001 0.037 
CA_127 0.053 0.068 0.066 -0.023 0.001 0.036 
CB_127 0.059 0.086 0.088 -0.044 -0.008 0.035 
C_127 0.051 0.065 0.049 -0.021 -0.001 0.032 
O_127 0.064 0.070 0.056 -0.014 0.008 0.039 
N_128 0.051 0.061 0.056 -0.013 0.005 0.034 
CA_128 0.051 0.063 0.046 -0.010 0.002 0.035 
CB_128 0.053 0.062 0.044 -0.012 0.001 0.033 
CG1_128 0.059 0.061 0.050 -0.012 0.006 0.035 
CG2_128 0.052 0.069 0.047 -0.009 -0.001 0.035 
C_128 0.055 0.069 0.046 -0.015 0.003 0.036 
O_128 0.054 0.074 0.068 -0.006 0.000 0.027 
N_129 0.049 0.080 0.058 -0.014 -0.003 0.031 
CA_129 0.050 0.096 0.060 -0.027 -0.008 0.034 
CB_129 0.058 0.206 0.051 -0.048 -0.007 0.045 
CG_129 0.112 0.295 0.130 -0.121 0.016 0.071 
CD_129 0.145 0.526 0.153 -0.205 -0.025 0.134 
NE_129 0.270 0.620 0.241 -0.262 0.005 0.222 
CZ_129 0.284 0.682 0.198 -0.231 -0.010 0.277 
NH1_129 0.249 0.723 0.100 -0.087 -0.004 0.288 
NH2_129 0.351 0.748 0.277 -0.316 -0.072 0.340 
C_129 0.054 0.074 0.051 -0.012 -0.009 0.036 
O_129 0.062 0.068 0.094 -0.015 0.001 0.032 
N_130 0.056 0.074 0.049 -0.021 -0.009 0.035 
CA_130 0.053 0.082 0.041 -0.014 -0.008 0.038 
C_130 0.050 0.060 0.046 -0.010 -0.005 0.029 
O_130 0.053 0.070 0.052 -0.010 -0.003 0.038 
N_131 0.049 0.063 0.044 -0.015 -0.005 0.035 
CA_131 0.047 0.056 0.043 -0.014 -0.005 0.030 
CB_131 0.050 0.061 0.044 -0.011 -0.005 0.033 
CG_131 0.049 0.066 0.041 -0.013 -0.002 0.034 
CD1_131 0.055 0.112 0.072 0.025 0.012 0.049 
CD2_131 0.055 0.066 0.102 -0.026 0.018 0.024 
C_131 0.047 0.054 0.044 -0.015 -0.010 0.029 
O_131 0.051 0.061 0.071 -0.027 0.001 0.021 
N_132 0.041 0.048 0.043 -0.014 -0.005 0.023 
CA_132 0.039 0.046 0.045 -0.010 -0.006 0.019 
CB_132 0.044 0.051 0.043 -0.007 -0.003 0.025 
OG1_132 0.053 0.070 0.044 -0.003 -0.002 0.039 
CG2_132 0.046 0.056 0.053 -0.007 -0.002 0.025 
C_132 0.039 0.050 0.050 -0.009 -0.007 0.022 
O_132 0.050 0.047 0.063 -0.007 -0.019 0.020 
N_133 0.044 0.049 0.061 -0.003 -0.015 0.017 
CA_133 0.052 0.048 0.065 -0.004 -0.008 0.027 
CA_133 0.040 0.056 0.059 0.002 -0.013 0.012 
CB_133 0.049 0.054 0.084 -0.009 -0.019 0.027 
CB_133 0.088 0.059 0.061 0.008 0.006 0.034 
CG_133 0.061 0.054 0.084 0.006 0.001 0.033 
CG_133 0.101 0.076 0.095 -0.015 -0.030 0.050 
CD_133 0.098 0.070 0.109 -0.002 -0.016 0.052 
CD_133 0.125 0.065 0.115 -0.023 -0.056 0.047 
OE1_133 0.119 0.069 0.137 -0.004 -0.009 0.026 
OE1_133 0.190 0.082 0.189 0.012 0.004 0.070 
NE2_133 0.126 0.103 0.105 -0.031 -0.018 0.084 
NE2_133 0.119 0.085 0.140 -0.028 -0.007 0.065 
C_133 0.044 0.054 0.066 0.004 -0.006 0.020 
O_133 0.044 0.074 0.077 0.000 -0.009 0.023 
N_134 0.046 0.068 0.067 0.006 -0.003 0.026 
CA_134 0.057 0.081 0.064 0.011 0.003 0.036 
C_134 0.048 0.057 0.064 0.001 -0.003 0.022 
O_134 0.061 0.078 0.077 0.015 0.006 0.040 
N_135 0.058 0.074 0.056 0.007 -0.003 0.035 
CA_135 0.067 0.073 0.071 0.009 -0.001 0.041 
CB_135 0.093 0.065 0.082 0.003 -0.014 0.043 
CG_135 0.072 0.062 0.103 0.017 -0.013 0.027 
OD1_135 0.069 0.082 0.091 0.015 0.003 0.038 
ND2_135 0.092 0.070 0.195 0.024 -0.023 0.023 
C_135 0.057 0.066 0.069 0.009 -0.002 0.031 
O_135 0.074 0.076 0.068 0.016 -0.006 0.034 
N_136 0.061 0.065 0.066 0.011 -0.003 0.026 
CA_136 0.059 0.073 0.061 0.006 0.005 0.027 
CB_136 0.067 0.072 0.068 0.003 0.008 0.033 
C_136 0.063 0.064 0.055 0.008 0.005 0.028 
O_136 0.074 0.113 0.055 0.001 0.003 0.051 
N_137 0.059 0.055 0.053 0.004 0.004 0.024 
C_137 0.059 0.046 0.044 0.002 -0.003 0.029 
O_137 0.059 0.047 0.064 0.007 0.008 0.029 
CA_137 0.059 0.049 0.066 -0.003 -0.004 0.024 
CA_137 0.067 0.047 0.041 0.006 0.003 0.034 
CB_137 0.082 0.045 0.064 0.006 -0.002 0.027 
CB_137 0.090 0.071 0.045 0.019 0.003 0.047 
SG_137 0.125 0.078 0.057 0.004 0.001 0.053 
SG1_137 0.094 0.102 0.042 0.006 -0.007 0.067 
N_138 0.060 0.042 0.057 0.003 -0.003 0.030 
CA_138 0.052 0.045 0.053 0.001 -0.004 0.030 
CA_138 0.059 0.063 0.069 0.035 0.010 0.040 
CA_138 0.057 0.038 0.043 -0.010 -0.004 0.031 
CB_138 0.059 0.068 0.057 0.011 -0.004 0.036 
CB_138 0.077 0.060 0.052 0.010 0.005 0.056 
CB_138 0.050 0.054 0.051 0.006 -0.012 0.021 
CG_138 0.114 0.082 0.066 -0.001 -0.013 0.046 
CG_138 0.069 0.053 0.093 0.000 -0.009 0.047 
CG_138 0.053 0.086 0.050 -0.031 0.023 -0.009 
SD_138 0.243 0.399 0.075 -0.063 -0.050 0.272 
SD_138 0.073 0.009 0.049 0.008 0.022 0.008 
SD_138 0.079 0.071 0.052 0.000 -0.011 0.047 
CE_138 0.158 0.499 0.075 0.007 0.040 0.159 
CE_138 0.058 0.042 0.007 0.064 0.030 -0.005 
CE_138 0.115 0.140 0.041 -0.059 -0.020 0.098 
C_138 0.057 0.050 0.048 0.001 -0.007 0.035 
O_138 0.063 0.044 0.074 0.001 -0.011 0.034 
N_139 0.057 0.047 0.072 0.007 -0.001 0.035 
CA_139 0.054 0.055 0.090 0.011 0.001 0.035 
C_139 0.056 0.050 0.079 0.003 -0.004 0.034 
O_139 0.059 0.057 0.093 0.015 0.002 0.040 
N_140 0.062 0.065 0.083 0.015 0.010 0.046 
N_140 0.078 0.060 0.054 -0.020 0.015 0.054 
N_140 0.062 0.057 0.073 0.033 0.009 0.043 
N_140 0.068 0.056 0.086 0.007 0.017 0.045 
C_140 0.044 0.067 0.068 0.012 0.005 0.042 
C_140 0.055 0.065 0.048 -0.002 0.013 0.054 
C_140 0.066 0.059 0.054 0.013 0.009 0.028 
C_140 0.030 0.062 0.059 0.015 0.003 0.030 
O_140 0.084 0.068 0.062 0.014 0.009 0.061 
O_140 0.065 0.081 0.050 -0.005 0.001 0.080 
O_140 0.071 0.100 0.051 0.007 0.007 0.037 
O_140 0.042 0.057 0.064 0.007 -0.002 0.042 
CA_140 0.067 0.072 0.066 0.016 0.012 0.059 
CA_140 0.072 0.075 0.050 0.003 0.013 0.072 
CA_140 0.091 0.060 0.064 0.026 0.031 0.039 
CA_140 0.086 0.066 0.048 0.011 0.025 0.055 
CB_140 0.070 0.076 0.067 0.027 0.022 0.062 
CB_140 0.079 0.093 0.096 0.010 0.005 0.086 
CB_140 0.090 0.099 0.090 0.004 0.045 0.052 
CB_140 0.058 0.080 0.107 0.001 0.016 0.044 
CG_140 0.056 0.083 0.054 0.016 0.014 0.056 
CG_140 0.098 0.108 0.115 0.007 -0.006 0.111 
CG_140 0.137 0.127 0.152 -0.034 0.022 0.086 
CG_140 0.084 0.085 0.093 0.016 0.051 0.064 
CD_140 0.063 0.088 0.051 -0.001 0.007 0.060 
CD_140 0.059 0.104 0.106 0.006 0.046 0.062 
CD_140 0.157 0.152 0.216 -0.069 -0.019 0.107 
CD_140 0.028 0.093 0.068 0.032 0.029 0.047 
NE_140 0.067 0.072 0.072 -0.005 0.002 0.051 
NE_140 0.025 0.059 0.134 0.016 0.048 0.035 
NE_140 0.229 0.153 0.209 0.065 0.134 0.140 
NE_140 0.054 0.078 0.075 0.053 0.046 0.038 
CZ_140 0.026 0.091 0.079 -0.023 0.004 0.020 
CZ_140 0.179 0.126 0.090 -0.007 -0.002 0.103 
CZ_140 0.101 0.100 0.238 0.080 0.115 0.040 
CZ_140 0.066 0.060 0.058 -0.017 -0.012 0.022 
NH1_140 0.112 0.209 0.063 -0.046 -0.023 0.121 
NH1_140 0.126 0.197 0.048 -0.102 -0.026 0.080 
NH1_140 0.276 0.142 0.115 0.068 0.132 0.164 
NH1_140 0.039 0.129 0.079 0.012 0.012 0.058 
NH2_140 0.099 0.209 0.043 -0.017 -0.023 0.114 
NH2_140 0.089 0.309 0.322 -0.224 -0.018 0.085 
NH2_140 0.248 0.186 0.361 0.079 -0.014 0.069 
NH2_140 0.101 0.082 0.051 -0.024 -0.023 0.053 
N_141 0.059 0.065 0.061 0.007 -0.002 0.043 
CA_141 0.047 0.056 0.064 0.008 -0.003 0.030 
C_141 0.049 0.054 0.043 0.002 -0.009 0.033 
O_141 0.049 0.051 0.056 0.001 -0.006 0.028 
N_142 0.048 0.048 0.045 0.000 -0.010 0.032 
CA_142 0.046 0.046 0.037 0.000 -0.011 0.029 
CB_142 0.048 0.044 0.037 -0.001 -0.009 0.029 
CG_142 0.050 0.048 0.039 0.003 -0.005 0.032 
OD1_142 0.075 0.051 0.045 0.009 0.005 0.041 
OD2_142 0.057 0.054 0.039 0.002 -0.008 0.032 
C_142 0.039 0.037 0.037 -0.002 -0.007 0.022 
O_142 0.041 0.050 0.035 0.002 -0.005 0.029 
N_143 0.044 0.054 0.039 -0.003 -0.007 0.035 
CA_143 0.042 0.050 0.035 -0.004 -0.002 0.028 
CB_143 0.069 0.074 0.052 0.002 0.007 0.052 
OG_143 0.095 0.087 0.064 -0.008 0.003 0.070 
C_143 0.036 0.045 0.032 -0.001 0.003 0.024 
O_143 0.043 0.045 0.042 -0.008 -0.009 0.024 
N_144 0.037 0.040 0.029 -0.003 -0.002 0.021 
CA_144 0.044 0.042 0.033 0.002 0.001 0.026 
C_144 0.038 0.039 0.026 -0.003 -0.006 0.021 
O_144 0.053 0.050 0.032 -0.001 -0.006 0.034 
N_145 0.033 0.040 0.032 0.000 -0.002 0.024 
CA_145 0.034 0.044 0.027 -0.002 -0.002 0.024 
C_145 0.037 0.039 0.022 0.001 -0.002 0.024 
O_145 0.036 0.045 0.035 -0.009 -0.006 0.025 
N_146 0.032 0.041 0.025 -0.003 -0.004 0.020 
CA_146 0.033 0.040 0.023 0.000 -0.002 0.021 
CB_146 0.039 0.045 0.029 0.001 0.003 0.027 
OG_146 0.048 0.040 0.025 0.002 0.002 0.024 
C_146 0.030 0.042 0.025 0.001 -0.002 0.022 
O_146 0.041 0.043 0.034 0.004 -0.010 0.019 
N_147 0.031 0.042 0.026 0.002 -0.001 0.021 
CA_147 0.032 0.038 0.028 0.001 -0.003 0.019 
CB_147 0.036 0.043 0.032 -0.001 -0.006 0.023 
CG_147 0.039 0.044 0.029 -0.006 -0.008 0.025 
CD2_147 0.043 0.045 0.031 -0.003 -0.006 0.026 
CE2_147 0.043 0.046 0.035 -0.004 -0.004 0.027 
CE3_147 0.042 0.052 0.048 -0.002 -0.002 0.027 
CD1_147 0.040 0.044 0.034 -0.003 -0.002 0.024 
NE1_147 0.037 0.047 0.041 -0.004 -0.004 0.026 
CZ2_147 0.052 0.054 0.056 -0.003 -0.006 0.036 
CZ3_147 0.050 0.045 0.072 0.004 0.009 0.021 
CH2_147 0.057 0.044 0.074 0.003 -0.001 0.029 
C_147 0.031 0.041 0.031 -0.001 -0.007 0.019 
O_147 0.033 0.050 0.037 0.006 -0.004 0.026 
N_148 0.036 0.047 0.036 0.004 -0.001 0.026 
CA_148 0.035 0.052 0.039 0.004 0.001 0.029 
CB_148 0.038 0.053 0.045 -0.001 -0.001 0.028 
CG2_148 0.061 0.066 0.051 -0.011 -0.016 0.038 
CG1_148 0.039 0.056 0.052 -0.004 0.000 0.030 
CD1_148 0.049 0.060 0.092 -0.013 0.000 0.033 
C_148 0.040 0.049 0.039 0.001 -0.001 0.027 
O_148 0.045 0.063 0.048 0.011 0.003 0.030 
N_149 0.036 0.060 0.052 0.015 0.007 0.026 
CA_149 0.041 0.068 0.069 0.022 0.012 0.028 
CB_149 0.037 0.069 0.081 0.019 0.011 0.024 
OG1_149 0.041 0.071 0.073 0.004 0.000 0.030 
CG2_149 0.046 0.068 0.094 -0.001 -0.005 0.026 
C_149 0.051 0.116 0.058 0.028 0.013 0.044 
O_149 0.055 0.114 0.051 0.005 0.008 0.045 
N_150 0.095 0.160 0.077 0.047 0.030 0.063 
C_150 0.104 0.280 0.044 0.011 0.028 0.110 
C_150 0.106 0.222 0.072 -0.013 0.000 0.083 
O_150 0.169 0.394 0.050 -0.062 -0.017 0.195 
O_150 0.255 0.371 0.105 -0.101 -0.006 0.183 
CA_150 0.142 0.275 0.058 0.060 0.048 0.120 
CA_150 0.110 0.244 0.053 0.052 0.028 0.091 
CB_150 0.225 0.319 0.117 0.106 0.103 0.130 
CB_150 0.133 0.294 0.067 0.080 0.025 0.084 
OG_150 0.287 0.365 0.168 0.068 0.128 0.041 
OG_150 0.116 0.201 0.068 0.067 0.024 0.033 
N_151 0.065 0.161 0.072 0.014 0.034 0.050 
N_151 0.102 0.174 0.087 0.020 0.001 0.062 
CA_151 0.058 0.193 0.092 -0.016 0.018 0.062 
CB_151 0.065 0.181 0.145 -0.024 0.001 0.054 
C_151 0.067 0.130 0.097 -0.036 -0.015 0.062 
O_151 0.087 0.143 0.285 -0.063 -0.052 0.082 
N_152 0.070 0.104 0.043 -0.013 0.003 0.054 
CA_152 0.076 0.093 0.050 -0.022 -0.006 0.052 
C_152 0.047 0.067 0.049 -0.014 -0.005 0.035 
O_152 0.063 0.065 0.062 -0.017 -0.012 0.036 
N_153 0.043 0.062 0.035 -0.004 0.001 0.032 
CA_153 0.040 0.058 0.031 -0.003 0.001 0.030 
CB_153 0.041 0.061 0.042 -0.006 -0.004 0.030 
CG_153 0.038 0.070 0.047 0.001 0.002 0.030 
CD_153 0.037 0.076 0.054 -0.002 -0.001 0.034 
OE1_153 0.055 0.081 0.055 0.007 0.002 0.044 
NE2_153 0.081 0.084 0.076 0.010 0.020 0.057 
C_153 0.038 0.054 0.031 -0.004 -0.004 0.027 
O_153 0.043 0.054 0.039 0.003 0.002 0.031 
N_154 0.039 0.054 0.033 -0.001 0.000 0.031 
CA_154 0.038 0.055 0.028 0.001 -0.001 0.032 
CB_154 0.041 0.059 0.034 0.003 0.003 0.031 
C_154 0.036 0.052 0.028 0.003 0.001 0.029 
O_154 0.059 0.063 0.037 -0.007 -0.015 0.044 
N_155 0.034 0.053 0.028 -0.001 -0.003 0.028 
CA_155 0.033 0.051 0.034 -0.002 -0.004 0.026 
CB_155 0.035 0.050 0.038 0.003 -0.001 0.025 
CG_155 0.040 0.054 0.039 0.004 0.002 0.022 
CD_155 0.033 0.055 0.040 0.000 0.003 0.021 
OE1_155 0.039 0.069 0.051 -0.014 -0.004 0.026 
NE2_155 0.043 0.068 0.048 -0.008 -0.005 0.031 
C_155 0.036 0.044 0.029 0.002 -0.001 0.025 
O_155 0.040 0.055 0.029 -0.003 -0.003 0.027 
N_156 0.035 0.053 0.026 -0.002 -0.001 0.028 
CA_156 0.033 0.058 0.031 0.000 -0.001 0.029 
C_156 0.035 0.043 0.024 0.002 -0.002 0.023 
O_156 0.040 0.052 0.025 0.000 0.001 0.028 
N_157 0.036 0.049 0.024 -0.004 -0.004 0.027 
CA_157 0.034 0.046 0.028 -0.005 -0.005 0.025 
CB_157 0.038 0.046 0.042 -0.002 -0.008 0.023 
CG1_157 0.053 0.049 0.070 -0.002 -0.008 0.028 
CG2_157 0.042 0.057 0.047 0.009 0.003 0.019 
C_157 0.027 0.043 0.030 -0.002 -0.002 0.018 
O_157 0.045 0.050 0.032 -0.011 -0.009 0.031 
N_158 0.038 0.041 0.029 -0.004 -0.005 0.025 
CA_158 0.039 0.042 0.025 -0.001 -0.004 0.027 
CA_158 0.035 0.034 0.038 -0.002 0.000 0.019 
CB_158 0.038 0.044 0.027 -0.003 -0.007 0.025 
CB_158 0.036 0.041 0.035 0.000 0.000 0.020 
CG_158 0.037 0.043 0.037 0.004 -0.007 0.023 
CG_158 0.042 0.046 0.042 0.002 0.000 0.023 
SD_158 0.045 0.045 0.032 0.004 0.001 0.029 
SD_158 0.054 0.052 0.060 0.005 0.004 0.029 
CE_158 0.075 0.046 0.055 -0.005 0.005 0.022 
CE_158 0.059 0.055 0.064 -0.010 -0.003 0.034 
C_158 0.037 0.043 0.030 0.000 -0.004 0.024 
O_158 0.039 0.043 0.034 -0.005 0.001 0.018 
N_159 0.033 0.041 0.033 -0.004 -0.001 0.021 
CA_159 0.040 0.045 0.035 -0.004 0.002 0.024 
CB_159 0.047 0.056 0.039 -0.006 -0.001 0.032 
OG_159 0.056 0.056 0.040 -0.007 0.004 0.030 
C_159 0.041 0.053 0.040 -0.003 0.003 0.029 
O_159 0.040 0.062 0.078 0.005 0.005 0.031 
N_160 0.042 0.055 0.049 0.001 0.001 0.033 
CA_160 0.052 0.061 0.066 0.009 0.004 0.040 
C_160 0.053 0.065 0.089 0.014 -0.002 0.041 
O_160 0.044 0.064 0.131 0.026 0.005 0.032 
N_161 0.057 0.074 0.213 0.059 0.023 0.044 
CA_161 0.069 0.098 0.363 0.116 0.037 0.053 
C_161 0.068 0.064 0.143 0.018 0.002 0.042 
O_161 0.074 0.083 0.141 0.032 0.012 0.056 
N_162 0.073 0.057 0.086 0.003 -0.007 0.042 
CA_162 0.088 0.065 0.064 -0.008 -0.012 0.053 
CB_162 0.104 0.059 0.066 -0.010 -0.012 0.052 
CG_162 0.098 0.058 0.075 -0.015 -0.021 0.047 
OD1_162 0.084 0.054 0.079 -0.012 -0.013 0.040 
ND2_162 0.127 0.059 0.115 -0.004 0.013 0.049 
C_162 0.081 0.064 0.077 -0.005 -0.008 0.050 
O_162 0.099 0.081 0.066 -0.006 -0.016 0.057 
N_163 0.090 0.075 0.084 -0.017 -0.016 0.045 
CA_163 0.097 0.089 0.097 -0.025 -0.030 0.059 
CB_163 0.122 0.086 0.150 -0.038 -0.042 0.052 
CG1_163 0.149 0.096 0.111 -0.029 -0.045 0.065 
CG2_163 0.114 0.114 0.253 -0.033 0.014 0.032 
C_163 0.088 0.086 0.101 -0.023 -0.019 0.052 
O_163 0.130 0.129 0.099 -0.033 -0.015 0.091 
N_164 0.104 0.092 0.096 -0.026 -0.019 0.068 
CA_164 0.099 0.086 0.103 -0.023 -0.015 0.063 
CB_164 0.107 0.081 0.136 -0.016 -0.007 0.061 
CG_164 0.103 0.080 0.143 -0.008 -0.008 0.054 
CD_164 0.133 0.073 0.153 -0.012 -0.028 0.054 
OE1_164 0.227 0.086 0.187 -0.032 -0.078 0.101 
NE2_164 0.144 0.072 0.156 -0.025 -0.047 0.062 
C_164 0.100 0.095 0.103 -0.012 -0.006 0.067 
O_164 0.097 0.096 0.089 -0.002 -0.004 0.058 
N_165 0.100 0.102 0.163 0.000 0.000 0.075 
C_165 0.067 0.118 0.168 0.022 -0.003 0.071 
C_165 0.082 0.098 0.160 0.012 0.019 0.048 
O_165 0.074 0.154 0.276 0.004 -0.009 0.060 
O_165 0.076 0.140 0.032 0.025 -0.001 0.037 
CA_165 0.098 0.119 0.168 0.016 0.012 0.083 
CA_165 0.116 0.131 0.182 -0.036 -0.034 0.084 
CB_165 0.137 0.168 0.203 0.019 0.017 0.125 
CB_165 0.108 0.142 0.295 -0.025 -0.040 0.102 
OG_165 0.211 0.148 0.224 0.057 0.024 0.129 
OG_165 0.095 0.150 0.622 0.075 -0.046 0.080 
N_166 0.078 0.072 0.105 0.020 -0.028 0.044 
N_166 0.070 0.077 0.133 0.013 0.002 0.034 
CA_166 0.074 0.077 0.092 0.017 -0.031 0.034 
CB_166 0.100 0.085 0.088 0.011 -0.043 0.045 
CG_166 0.087 0.067 0.061 0.011 -0.022 0.035 
OD1_166 0.084 0.075 0.059 0.001 -0.022 0.042 
ND2_166 0.103 0.092 0.067 0.008 -0.024 0.044 
C_166 0.067 0.072 0.076 0.000 -0.029 0.035 
O_166 0.099 0.076 0.069 -0.006 -0.034 0.040 
N_167 0.077 0.066 0.070 0.001 -0.020 0.047 
CA_167 0.072 0.067 0.070 0.008 -0.011 0.044 
C_167 0.071 0.059 0.057 0.003 -0.006 0.042 
O_167 0.078 0.067 0.087 0.021 0.004 0.049 
N_168 0.069 0.058 0.059 -0.001 -0.017 0.044 
CA_168 0.068 0.054 0.048 -0.001 -0.017 0.039 
CB_168 0.076 0.052 0.052 -0.007 -0.018 0.039 
CG_168 0.081 0.063 0.050 -0.010 -0.017 0.041 
OD1_168 0.087 0.069 0.066 0.015 -0.030 0.022 
ND2_168 0.085 0.071 0.050 -0.003 -0.020 0.034 
C_168 0.072 0.056 0.048 -0.005 -0.020 0.043 
O_168 0.083 0.058 0.073 -0.011 -0.029 0.049 
N_169 0.066 0.046 0.048 -0.002 -0.013 0.034 
CA_169 0.071 0.045 0.057 -0.002 -0.018 0.032 
CB_169 0.071 0.052 0.055 -0.008 -0.016 0.036 
CG_169 0.063 0.048 0.049 -0.005 -0.011 0.030 
OD1_169 0.070 0.050 0.053 -0.007 -0.014 0.035 
ND2_169 0.079 0.062 0.054 -0.010 -0.022 0.046 
C_169 0.071 0.048 0.060 0.006 -0.016 0.031 
O_169 0.079 0.056 0.068 0.006 -0.012 0.029 
N_170 0.079 0.054 0.048 0.003 -0.010 0.028 
CA_170 0.112 0.066 0.051 0.008 -0.008 0.038 
CA_170 0.069 0.057 0.055 0.005 -0.006 0.022 
CB_170 0.105 0.072 0.068 -0.002 -0.018 0.028 
CB_170 0.073 0.068 0.018 0.016 0.002 0.033 
SG_170 0.124 0.068 0.064 -0.001 -0.015 0.031 
SG1_170 0.104 0.047 0.056 -0.009 0.006 0.030 
C_170 0.096 0.072 0.060 0.020 -0.008 0.029 
O_170 0.120 0.096 0.083 0.039 0.009 0.042 
N_171 0.103 0.067 0.062 0.015 -0.024 0.032 
CA_171 0.116 0.074 0.087 0.021 -0.034 0.035 
C_171 0.122 0.077 0.103 0.025 -0.030 0.042 
O_171 0.170 0.083 0.140 0.022 -0.055 0.060 
N_172 0.115 0.061 0.105 0.009 -0.039 0.037 
CA_172 0.106 0.060 0.127 0.015 -0.038 0.033 
CB_172 0.113 0.062 0.129 0.002 -0.038 0.036 
CG2_172 0.129 0.129 0.164 0.012 -0.030 0.071 
CG1_172 0.176 0.074 0.103 -0.008 -0.031 0.071 
CD1_172 0.121 0.069 0.117 -0.012 -0.016 0.040 
C_172 0.112 0.067 0.098 0.017 -0.024 0.032 
O_172 0.116 0.080 0.091 0.014 -0.020 0.046 
N_173 0.108 0.081 0.127 0.031 -0.026 0.032 
CD_173 0.146 0.061 0.203 0.033 -0.065 0.018 
CA_173 0.111 0.107 0.124 0.054 -0.016 0.026 
CB_173 0.138 0.108 0.189 0.084 -0.038 0.000 
CG_173 0.150 0.091 0.270 0.033 -0.038 0.021 
C_173 0.095 0.073 0.101 0.021 -0.019 0.025 
O_173 0.095 0.065 0.104 0.019 -0.015 0.023 
N_174 0.107 0.099 0.095 0.024 -0.009 0.037 
CA_174 0.096 0.081 0.090 0.022 -0.006 0.030 
CB_174 0.117 0.115 0.095 0.010 -0.002 0.051 
C_174 0.092 0.072 0.103 0.022 -0.007 0.030 
O_174 0.099 0.069 0.097 0.011 -0.019 0.030 
N_175 0.085 0.077 0.123 0.020 -0.016 0.010 
CA_175 0.100 0.078 0.147 0.003 -0.022 0.017 
CB_175 0.120 0.082 0.219 0.013 -0.015 -0.002 
OG_175 0.195 0.079 0.266 0.041 -0.021 0.036 
C_175 0.114 0.072 0.137 -0.003 -0.033 0.026 
O_175 0.137 0.134 0.152 -0.043 -0.048 0.048 
N_176 0.095 0.033 0.133 0.004 -0.022 0.008 
N_176 0.113 0.099 0.086 0.007 -0.022 0.038 
CA_176 0.114 0.057 0.115 -0.006 -0.018 0.020 
CA_176 0.128 0.065 0.122 0.003 -0.015 0.049 
CB_176 0.122 0.054 0.158 -0.010 -0.015 0.043 
CB_176 0.137 0.116 0.225 0.071 -0.003 0.065 
CG_176 0.187 0.060 0.251 0.013 -0.041 0.041 
CG_176 0.130 0.149 0.390 0.143 -0.040 0.054 
CD_176 0.249 0.096 0.377 0.064 -0.037 0.097 
CD_176 0.240 0.094 0.400 0.063 0.073 0.038 
OE1_176 0.266 0.104 0.251 -0.013 -0.106 0.094 
OE1_176 0.544 0.263 0.609 -0.037 0.211 0.255 
NE2_176 0.293 0.182 0.372 0.136 0.026 0.134 
NE2_176 0.189 0.125 0.516 -0.049 -0.042 0.068 
C_176 0.100 0.059 0.098 -0.007 -0.013 0.028 
C_176 0.097 0.068 0.101 0.001 -0.023 0.042 
O_176 0.133 0.055 0.145 -0.010 0.022 0.031 
O_176 0.100 0.086 0.127 -0.014 -0.017 0.046 
N_177 0.089 0.057 0.083 0.000 -0.017 0.027 
CA_177 0.080 0.060 0.080 0.004 -0.014 0.030 
CB_177 0.079 0.054 0.079 0.009 -0.010 0.031 
CG_177 0.078 0.052 0.086 0.006 -0.017 0.024 
CD_177 0.082 0.060 0.084 0.004 -0.005 0.032 
NE_177 0.096 0.081 0.084 0.006 -0.014 0.050 
CZ_177 0.111 0.080 0.076 0.008 -0.008 0.050 
NH1_177 0.112 0.120 0.080 0.019 0.012 0.067 
NH2_177 0.201 0.156 0.079 0.018 -0.009 0.116 
C_177 0.078 0.065 0.084 0.007 -0.016 0.028 
O_177 0.079 0.110 0.109 0.035 -0.020 0.023 
N_178 0.079 0.050 0.070 -0.001 -0.014 0.033 
CA_178 0.089 0.059 0.069 -0.003 -0.009 0.041 
CA_178 0.081 0.057 0.072 -0.002 -0.015 0.043 
CB_178 0.124 0.076 0.078 -0.005 -0.008 0.062 
CB_178 0.096 0.075 0.071 -0.001 -0.013 0.057 
OG_178 0.182 0.118 0.082 0.003 -0.004 0.099 
OG_178 0.065 0.052 0.013 0.050 0.022 0.024 
C_178 0.069 0.057 0.075 0.009 0.006 0.039 
O_178 0.072 0.061 0.169 0.007 0.015 0.044 
N_179 0.054 0.050 0.053 0.003 -0.002 0.028 
CA_179 0.048 0.046 0.052 0.004 -0.004 0.026 
CB_179 0.055 0.055 0.045 0.004 -0.006 0.034 
OG_179 0.083 0.079 0.047 0.007 -0.004 0.058 
C_179 0.045 0.050 0.046 0.002 -0.005 0.025 
O_179 0.044 0.083 0.062 0.024 0.002 0.034 
N_180 0.039 0.046 0.043 0.002 -0.005 0.023 
CA_180 0.041 0.048 0.039 0.002 -0.004 0.023 
CB_180 0.054 0.056 0.046 -0.001 -0.002 0.031 
CG_180 0.071 0.057 0.059 -0.003 0.003 0.036 
CD1_180 0.103 0.081 0.110 -0.011 0.027 0.054 
CD2_180 0.076 0.062 0.115 -0.023 0.000 0.029 
C_180 0.035 0.047 0.037 0.002 -0.002 0.019 
O_180 0.042 0.047 0.053 0.001 -0.009 0.023 
N_181 0.039 0.041 0.039 -0.004 -0.008 0.020 
CA_181 0.040 0.045 0.032 -0.003 -0.005 0.022 
CB_181 0.051 0.050 0.031 -0.006 0.000 0.023 
CG_181 0.049 0.049 0.033 -0.011 0.001 0.024 
CD1_181 0.058 0.049 0.046 -0.007 0.004 0.031 
CD2_181 0.054 0.054 0.035 -0.006 -0.001 0.023 
CE1_181 0.062 0.066 0.058 -0.009 -0.001 0.043 
CE2_181 0.052 0.055 0.049 -0.010 0.006 0.018 
CZ_181 0.051 0.067 0.063 -0.021 0.002 0.031 
C_181 0.039 0.045 0.033 -0.006 -0.003 0.027 
O_181 0.043 0.048 0.034 -0.008 -0.007 0.022 
N_182 0.042 0.048 0.028 -0.004 -0.006 0.026 
CA_182 0.048 0.052 0.023 -0.004 -0.004 0.032 
CB_182 0.044 0.051 0.036 -0.001 0.002 0.027 
CG_182 0.056 0.055 0.044 0.004 0.005 0.034 
CD_182 0.058 0.065 0.043 0.000 0.002 0.040 
OE1_182 0.080 0.061 0.053 -0.006 0.014 0.028 
OE2_182 0.064 0.063 0.039 0.007 0.008 0.038 
C_182 0.046 0.050 0.022 0.000 0.001 0.028 
O_182 0.051 0.056 0.030 -0.005 -0.002 0.035 
N_183 0.049 0.055 0.032 -0.006 -0.004 0.034 
CA_183 0.046 0.053 0.036 0.002 -0.001 0.031 
CB_183 0.046 0.057 0.040 0.002 -0.006 0.030 
CG_183 0.056 0.055 0.047 0.003 -0.004 0.027 
CD_183 0.069 0.063 0.064 0.001 -0.013 0.032 
NE_183 0.063 0.077 0.059 -0.001 -0.010 0.038 
CZ_183 0.068 0.067 0.061 0.003 -0.012 0.031 
NH1_183 0.082 0.102 0.070 0.025 0.004 0.053 
NH2_183 0.101 0.116 0.076 0.005 -0.005 0.073 
C_183 0.043 0.056 0.032 -0.002 -0.003 0.032 
O_183 0.058 0.057 0.037 0.004 0.008 0.032 
N_184 0.045 0.050 0.036 0.006 0.002 0.028 
CA_184 0.045 0.051 0.031 0.002 -0.001 0.029 
CB_184 0.045 0.054 0.032 0.004 0.001 0.030 
CG_184 0.051 0.054 0.033 0.000 -0.004 0.030 
CD1_184 0.055 0.063 0.043 -0.004 -0.004 0.030 
CD2_184 0.075 0.069 0.041 0.001 0.008 0.044 
C_184 0.047 0.050 0.027 0.001 0.001 0.029 
O_184 0.052 0.053 0.028 -0.001 -0.003 0.030 
N_185 0.048 0.057 0.037 0.006 -0.003 0.032 
CA_185 0.053 0.066 0.040 0.004 -0.008 0.038 
CB_185 0.057 0.089 0.054 0.001 -0.014 0.042 
CG_185 0.067 0.108 0.081 0.002 -0.003 0.050 
CD_185 0.066 0.181 0.066 -0.012 -0.013 0.051 
OE1_185 0.077 0.282 0.110 -0.079 0.011 0.013 
NE2_185 0.076 0.181 0.077 -0.007 0.000 0.056 
C_185 0.051 0.059 0.033 -0.001 -0.011 0.034 
O_185 0.060 0.063 0.036 0.001 -0.009 0.039 
N_186 0.050 0.059 0.035 -0.003 -0.011 0.031 
CD_186 0.062 0.054 0.048 -0.003 -0.008 0.033 
CA_186 0.055 0.064 0.030 -0.003 -0.007 0.035 
CB_186 0.063 0.063 0.044 -0.010 -0.006 0.032 
CG_186 0.075 0.067 0.061 -0.006 -0.002 0.041 
C_186 0.056 0.057 0.028 -0.002 -0.005 0.038 
O_186 0.055 0.061 0.033 -0.002 -0.008 0.033 
N_187 0.046 0.052 0.032 -0.002 -0.007 0.030 
CA_187 0.043 0.058 0.028 -0.003 -0.004 0.030 
CB_187 0.046 0.061 0.030 -0.001 -0.005 0.035 
CG2_187 0.055 0.061 0.040 -0.006 -0.013 0.035 
CG1_187 0.045 0.060 0.043 0.004 -0.004 0.034 
CD1_187 0.065 0.073 0.044 0.001 -0.013 0.048 
C_187 0.044 0.055 0.024 0.000 -0.005 0.028 
O_187 0.048 0.059 0.034 0.000 -0.003 0.031 
N_188 0.043 0.052 0.026 0.003 -0.002 0.029 
CA_188 0.049 0.050 0.025 -0.001 -0.004 0.031 
CB_188 0.053 0.057 0.030 0.002 0.001 0.038 
CG_188 0.062 0.058 0.026 0.004 0.004 0.037 
CD1_188 0.080 0.090 0.041 0.014 0.016 0.062 
CD2_188 0.098 0.068 0.029 0.001 -0.003 0.041 
C_188 0.043 0.047 0.032 0.001 0.000 0.029 
O_188 0.056 0.053 0.029 -0.001 -0.005 0.031 
N_189 0.046 0.052 0.024 0.002 -0.002 0.028 
CA_189 0.048 0.060 0.026 0.002 -0.007 0.033 
CB_189 0.051 0.062 0.033 -0.002 -0.009 0.031 
OG_189 0.059 0.061 0.042 -0.007 -0.008 0.030 
C_189 0.051 0.055 0.024 0.000 -0.006 0.029 
O_189 0.057 0.064 0.039 0.010 -0.002 0.031 
N_190 0.048 0.055 0.027 -0.001 0.000 0.029 
CA_190 0.050 0.064 0.023 -0.003 -0.004 0.034 
CA_190 0.048 0.063 0.026 -0.003 0.000 0.028 
CB_190 0.055 0.069 0.031 -0.005 -0.003 0.041 
CB_190 0.048 0.052 0.054 -0.001 0.000 0.028 
CG_190 0.057 0.075 0.039 0.015 0.006 0.044 
CG_190 0.059 0.065 0.057 -0.005 -0.006 0.040 
CD_190 0.081 0.101 0.062 0.029 0.026 0.067 
CD_190 0.063 0.065 0.056 0.000 0.002 0.038 
OE1_190 0.089 0.092 0.085 0.029 0.022 0.066 
OE1_190 0.103 0.065 0.065 -0.003 0.026 0.044 
NE2_190 0.130 0.143 0.165 0.089 0.099 0.111 
NE2_190 0.117 0.084 0.052 0.003 0.020 0.042 
C_190 0.047 0.065 0.031 -0.002 0.003 0.032 
O_190 0.070 0.075 0.035 -0.001 0.010 0.023 
N_191 0.041 0.054 0.031 0.000 -0.001 0.027 
CA_191 0.047 0.057 0.034 -0.001 -0.002 0.029 
CB_191 0.052 0.069 0.044 -0.010 -0.011 0.038 
CG_191 0.048 0.066 0.048 -0.012 -0.012 0.034 
CD1_191 0.054 0.067 0.060 -0.002 -0.002 0.032 
CE1_191 0.061 0.067 0.085 0.006 -0.003 0.037 
CD2_191 0.048 0.070 0.060 -0.002 -0.003 0.035 
CE2_191 0.057 0.085 0.070 -0.002 0.002 0.044 
CZ_191 0.059 0.075 0.087 -0.007 -0.004 0.045 
OH_191 0.082 0.090 0.123 -0.001 0.008 0.063 
C_191 0.052 0.057 0.031 0.002 -0.001 0.031 
O_191 0.055 0.055 0.055 0.000 -0.001 0.028 
N_192 0.052 0.056 0.026 0.002 0.000 0.033 
CA_192 0.057 0.067 0.030 0.010 0.003 0.040 
C_192 0.052 0.055 0.035 0.005 0.001 0.036 
O_192 0.080 0.060 0.041 0.008 0.005 0.046 
N_193 0.053 0.053 0.023 -0.001 -0.004 0.032 
CA_193 0.050 0.052 0.025 -0.001 -0.003 0.029 
CB_193 0.056 0.055 0.023 0.001 -0.003 0.032 
CG_193 0.064 0.068 0.030 0.004 -0.003 0.046 
CD1_193 0.080 0.070 0.034 -0.003 -0.009 0.054 
CD2_193 0.058 0.072 0.064 0.014 -0.002 0.038 
C_193 0.052 0.057 0.029 0.002 -0.003 0.034 
O_193 0.050 0.066 0.043 -0.009 -0.005 0.027 
N_194 0.050 0.056 0.033 0.001 0.001 0.027 
CA_194 0.050 0.071 0.032 0.000 0.001 0.033 
CB_194 0.077 0.091 0.045 0.017 0.012 0.059 
OG_194 0.099 0.154 0.065 0.029 0.005 0.089 
C_194 0.048 0.057 0.035 0.001 0.001 0.031 
O_194 0.053 0.062 0.042 0.011 -0.004 0.026 
N_195 0.046 0.072 0.034 0.005 0.000 0.028 
N_195 0.058 0.038 0.058 0.004 0.007 0.030 
CA_195 0.050 0.060 0.044 0.016 0.005 0.034 
CA_195 0.071 0.068 0.060 0.025 0.025 0.047 
CB_195 0.046 0.062 0.026 0.007 0.001 0.026 
CB_195 0.055 0.089 0.044 0.016 0.020 0.044 
CG_195 0.045 0.049 0.028 0.003 -0.002 0.025 
CG_195 0.054 0.070 0.031 0.017 0.002 0.028 
CD1_195 0.045 0.055 0.044 0.008 0.002 0.027 
CD1_195 0.038 0.095 0.072 0.036 0.021 0.045 
CD2_195 0.042 0.050 0.043 0.008 0.006 0.018 
CD2_195 0.047 0.082 0.070 0.052 0.024 0.039 
C_195 0.065 0.077 0.039 0.020 0.004 0.050 
C_195 0.073 0.096 0.030 0.036 0.044 0.069 
O_195 0.082 0.130 0.038 0.009 0.002 0.083 
O_195 0.157 0.162 0.042 0.017 0.004 0.141 
N_196 0.064 0.090 0.038 0.021 0.014 0.054 
CA_196 0.078 0.091 0.042 0.025 0.017 0.060 
CB_196 0.080 0.079 0.049 0.019 0.017 0.050 
CG1_196 0.107 0.103 0.060 0.008 0.026 0.039 
CG2_196 0.088 0.073 0.061 0.016 0.019 0.043 
C_196 0.067 0.084 0.037 0.014 0.010 0.054 
O_196 0.066 0.083 0.049 0.021 0.018 0.054 
N_197 0.080 0.103 0.056 0.035 0.027 0.072 
CA_197 0.067 0.094 0.058 0.027 0.015 0.061 
CB_197 0.076 0.155 0.069 0.021 0.000 0.076 
OG1_197 0.143 0.273 0.094 0.036 0.001 0.167 
CG2_197 0.084 0.166 0.055 0.004 -0.006 0.064 
C_197 0.074 0.095 0.073 0.031 0.029 0.070 
O_197 0.129 0.093 0.117 0.051 0.072 0.085 
N_198 0.075 0.075 0.062 0.013 0.018 0.056 
CA_198 0.080 0.080 0.066 0.007 0.025 0.056 
C_198 0.069 0.098 0.055 0.003 0.006 0.058 
OT1_198 0.067 0.135 0.064 -0.004 0.012 0.053 
OT2_198 0.074 0.130 0.087 -0.028 -0.001 0.050 
S_200 0.085 0.071 0.054 0.002 -0.006 0.036 
O1_200 0.099 0.072 0.061 0.011 0.022 0.046 
O2_200 0.114 0.134 0.072 -0.015 -0.035 0.070 
O3_200 0.060 0.065 0.049 -0.004 -0.004 0.015 
O4_200 0.101 0.056 0.045 0.006 -0.010 0.037 
S_201 0.059 0.080 0.046 0.014 0.000 0.039 
O1_201 0.095 0.112 0.044 0.012 0.001 0.069 
O2_201 0.081 0.102 0.060 0.023 0.017 0.060 
O3_201 0.093 0.114 0.064 0.032 0.024 0.072 
O4_201 0.070 0.090 0.134 0.015 -0.014 0.037 
S_202 0.089 0.115 0.083 0.032 0.026 0.069 
S_202 0.047 0.058 0.026 -0.026 -0.025 0.038 
O1_202 0.059 0.105 0.062 0.022 0.008 0.046 
O1_202 0.057 0.065 0.011 -0.002 -0.010 0.037 
O2_202 0.070 0.118 0.065 0.018 0.007 0.044 
O2_202 0.082 0.113 0.012 -0.012 -0.025 0.077 
O3_202 0.073 0.211 0.116 0.067 0.007 0.085 
O3_202 0.098 0.121 0.034 -0.015 -0.008 0.093 
O4_202 0.220 0.096 0.295 0.022 0.140 0.074 
O4_202 0.055 0.049 0.075 -0.022 -0.021 0.030 
S_203 0.110 0.141 0.089 0.030 0.050 0.043 
S_203 0.110 0.164 0.088 0.015 0.042 0.064 
O1_203 0.151 0.176 0.100 0.018 0.030 0.093 
O1_203 0.073 0.081 0.072 -0.021 0.001 0.024 
O2_203 0.144 0.155 0.133 0.037 0.080 0.028 
O2_203 0.175 0.403 0.147 -0.112 0.097 -0.039 
O3_203 0.133 0.200 0.142 0.030 0.062 0.100 
O3_203 0.403 0.304 0.094 0.023 0.102 0.270 
O4_203 0.109 0.147 0.155 -0.002 0.054 0.043 
O4_203 0.351 0.382 0.074 0.025 0.022 0.254 
S_204 0.086 0.132 0.082 -0.040 0.007 0.066 
O1_204 0.176 0.222 0.065 -0.006 0.023 0.156 
O2_204 0.254 0.104 0.104 -0.023 0.013 0.044 
O3_204 0.145 0.165 0.075 -0.032 0.012 0.112 
O4_204 0.138 0.161 0.077 -0.053 -0.013 0.106 
S_205 0.141 0.299 0.228 -0.184 -0.014 0.074 
O1_205 0.201 0.390 0.134 -0.202 -0.081 0.171 
O2_205 0.189 0.308 0.194 -0.202 0.046 0.023 
O3_205 0.165 0.316 0.275 -0.157 -0.005 0.107 
O4_205 0.148 0.359 0.335 -0.161 0.022 0.089 
S_206 0.136 0.106 0.317 0.023 -0.031 0.061 
S_206 0.177 0.083 0.299 0.009 -0.053 0.083 
O1_206 0.161 0.155 0.595 -0.033 -0.117 0.115 
O1_206 0.197 0.124 0.395 0.027 -0.070 0.125 
O2_206 0.161 0.111 0.436 0.056 -0.090 0.040 
O2_206 0.206 0.114 0.210 0.057 -0.122 0.005 
O3_206 0.148 0.283 0.269 0.015 -0.028 -0.009 
O3_206 0.113 0.086 0.130 0.013 0.002 0.072 
O4_206 0.138 0.075 0.260 -0.020 -0.005 0.078 
O4_206 0.160 0.129 0.434 -0.135 -0.066 0.078 
S_207 0.071 0.134 0.191 0.024 0.006 0.049 
O1_207 0.073 0.210 0.415 0.084 0.020 0.065 
O2_207 0.138 0.125 0.154 -0.005 0.035 0.070 
O3_207 0.277 0.134 0.313 0.001 0.160 0.021 
O4_207 0.092 0.283 0.188 0.080 0.038 0.088 
S_208 0.246 0.366 0.166 -0.043 -0.083 0.097 
O1_208 0.172 0.448 0.328 0.200 -0.157 -0.022 
O2_208 0.536 0.285 0.094 -0.093 0.064 -0.061 
O3_208 0.212 0.479 0.073 -0.107 -0.042 0.239 
O4_208 0.115 0.313 0.366 -0.113 -0.133 0.090 
S_209 0.325 0.324 0.116 0.038 -0.002 0.197 
S_209 0.313 0.584 0.427 -0.043 -0.045 0.188 
O1_209 0.341 0.414 0.169 -0.077 -0.012 0.299 
O1_209 0.303 0.340 0.344 -0.026 0.104 0.136 
O2_209 0.433 0.290 0.266 0.083 -0.058 0.240 
O2_209 0.513 0.192 0.207 0.048 -0.081 0.185 
O3_209 0.261 0.233 0.125 0.061 0.069 0.156 
O3_209 0.491 0.417 0.213 -0.071 0.088 0.244 
O4_209 0.305 0.310 0.166 0.177 0.104 0.175 
O4_209 0.246 0.367 0.403 -0.147 -0.128 0.240 
CX1_210 0.056 0.076 0.073 0.005 0.006 0.041 
OX1_210 0.077 0.124 0.090 0.039 0.031 0.075 
CX2_210 0.060 0.102 0.072 0.010 0.008 0.052 
OX2_210 0.073 0.248 0.068 0.026 0.004 0.092 
CX3_210 0.068 0.090 0.064 -0.001 0.004 0.052 
OX3_210 0.105 0.121 0.098 0.026 0.043 0.090 
S_211 0.151 0.114 0.165 -0.032 0.017 0.089 
O1_211 0.221 0.213 0.146 0.005 0.032 0.114 
O2_211 0.188 0.111 0.196 0.015 0.046 0.100 
O3_211 0.284 0.126 0.183 -0.047 -0.004 0.152 
O4_211 0.208 0.205 0.185 -0.104 -0.010 0.086 
CX1_212 0.171 0.187 0.070 -0.031 -0.028 0.139 
OX1_212 0.034 0.092 0.067 -0.001 0.016 0.024 
CX2_212 0.280 0.160 0.058 -0.008 -0.003 0.164 
OX2_212 0.078 0.076 0.050 0.000 0.007 0.037 
CX3_212 0.138 0.102 0.060 -0.011 -0.014 0.069 
OX3_212 0.219 0.246 0.332 -0.162 0.125 0.003 
O_300 0.206 0.182 0.134 -0.005 -0.046 0.109 
O_300 0.270 0.253 0.146 -0.048 0.015 0.135 
O_301 0.221 0.148 0.070 -0.012 -0.018 0.132 
O_302 0.140 0.081 0.066 -0.011 -0.009 0.057 
O_303 0.108 0.111 0.119 -0.026 -0.050 0.052 
O_304 0.461 0.446 0.374 -0.323 -0.206 0.223 
O_305 0.341 0.243 0.704 -0.260 -0.161 0.155 
O_306 0.149 0.096 0.259 0.019 0.000 0.049 
O_307 0.137 0.127 0.183 -0.047 -0.039 0.053 
O_308 0.219 0.132 0.380 -0.021 0.065 0.001 
O_309 0.079 0.071 0.137 0.009 -0.027 0.030 
O_310 0.101 0.055 0.095 0.025 0.001 0.047 
O_310 0.100 0.190 0.217 0.183 0.090 0.105 
O_313 0.052 0.072 0.099 0.017 -0.003 0.026 
O_314 0.254 0.110 0.167 0.057 0.028 0.055 
O_314 0.083 0.161 0.110 0.072 0.005 0.010 
O_315 0.109 0.136 0.047 0.008 0.002 0.070 
O_316 0.239 0.146 0.271 -0.021 -0.182 0.060 
O_316 0.269 0.285 0.155 -0.015 -0.102 0.164 
O_317 0.106 0.146 0.061 -0.018 0.001 0.085 
O_318 0.100 0.106 0.056 0.005 0.000 0.077 
O_319 0.116 0.134 0.079 0.034 -0.020 0.044 
O_320 0.082 0.117 0.163 0.050 0.033 0.067 
O_320 0.343 0.157 0.268 -0.027 0.065 0.105 
O_321 0.117 0.117 0.184 -0.074 -0.015 0.056 
O_322 0.093 0.065 0.069 0.007 0.008 0.037 
O_323 0.095 0.056 0.062 -0.006 0.004 0.050 
O_324 0.127 0.118 0.081 0.037 0.026 0.070 
O_324 0.093 0.088 0.061 0.012 -0.002 0.051 
O_325 0.180 0.112 0.527 0.069 -0.059 0.054 
O_326 0.208 0.091 0.157 0.019 -0.009 0.077 
O_327 0.328 0.169 0.321 0.033 0.110 -0.013 
O_328 0.142 0.220 0.169 -0.104 -0.032 -0.042 
O_329 0.285 0.145 0.445 -0.124 -0.115 0.126 
O_330 0.137 0.087 0.273 -0.078 -0.011 0.040 
O_331 0.087 0.108 0.095 -0.045 -0.012 0.043 
O_332 0.304 0.557 0.149 -0.128 -0.102 0.228 
O_333 0.157 0.150 0.086 0.013 0.016 0.063 
O_334 0.227 0.176 0.230 -0.111 -0.177 0.141 
O_335 0.059 0.082 0.063 -0.001 -0.002 0.046 
O_335 0.158 0.110 0.185 0.005 -0.051 0.074 
O_336 0.142 0.138 0.091 0.010 0.044 0.061 
O_337 0.243 0.257 0.144 -0.008 0.038 0.142 
O_338 0.272 0.342 0.393 0.019 0.174 0.180 
O_339 0.110 0.171 0.082 0.012 -0.001 0.099 
O_340 0.335 0.272 0.319 0.168 -0.002 0.176 
O_341 0.058 0.051 0.049 0.007 0.007 0.032 
O_342 0.082 0.093 0.064 0.002 0.022 0.041 
O_343 0.128 0.192 0.062 -0.053 -0.041 0.129 
O_344 0.059 0.082 0.073 0.000 0.007 0.043 
O_345 0.085 0.124 0.103 -0.020 0.005 0.059 
O_346 0.110 0.155 0.079 -0.025 -0.018 0.063 
O_347 0.164 0.198 0.130 -0.035 -0.072 0.101 
O_348 0.059 0.067 0.056 -0.014 -0.006 0.033 
O_349 0.076 0.073 0.057 -0.015 -0.003 0.040 
O_350 0.106 0.084 0.056 -0.005 -0.002 0.055 
O_351 0.196 0.252 0.148 -0.080 0.009 0.135 
O_352 0.153 0.173 0.078 -0.018 0.009 0.096 
O_353 0.142 0.127 0.081 -0.027 -0.003 0.086 
O_354 0.139 0.157 0.090 -0.014 -0.002 0.105 
O_355 0.147 0.145 0.207 0.072 -0.047 0.068 
O_355 0.261 0.123 0.453 0.055 -0.166 0.066 
O_356 0.168 0.173 0.384 0.149 0.057 0.121 
O_357 0.145 0.111 0.235 0.032 -0.021 0.055 
O_358 0.257 0.304 0.424 -0.207 -0.095 0.156 
O_359 0.269 0.248 0.427 -0.009 0.013 0.110 
O_360 0.162 0.142 0.185 -0.054 -0.051 0.058 
O_361 0.294 0.587 0.223 -0.161 -0.083 0.131 
O_362 0.235 0.150 0.163 0.087 0.052 0.043 
O_363 0.300 0.295 0.169 0.001 -0.027 0.065 
O_364 0.248 0.284 0.083 0.076 0.081 0.178 
O_364 0.336 0.508 0.178 -0.025 -0.011 0.227 
O_365 0.133 0.253 0.199 0.017 -0.039 0.111 
O_366 0.422 0.195 0.238 0.059 0.052 0.079 
O_367 0.124 0.257 0.348 0.133 0.040 0.101 
O_368 0.127 0.253 0.240 -0.124 -0.088 0.088 
O_369 0.200 0.192 0.158 -0.047 -0.008 -0.021 
O_370 0.044 0.064 0.082 -0.005 0.002 0.023 
O_371 0.158 0.135 0.155 0.047 0.055 0.114 
O_372 0.091 0.107 0.119 0.020 -0.001 0.044 
O_373 0.056 0.081 0.066 -0.003 -0.004 0.027 
O_374 0.092 0.110 0.078 -0.007 -0.018 0.061 
O_375 0.151 0.159 0.103 0.033 0.039 0.126 
O_377 0.203 0.098 0.067 -0.001 -0.003 0.057 
O_378 0.085 0.152 0.063 0.006 -0.009 0.066 
O_378 0.049 0.136 0.057 0.020 -0.001 0.063 
O_379 0.290 0.247 0.140 0.048 0.075 0.188 
O_379 0.078 0.245 0.081 -0.020 0.014 0.069 
O_380 0.174 0.162 0.087 0.020 0.048 0.053 
O_380 0.298 0.206 0.288 0.044 -0.088 0.149 
O_381 0.197 0.261 0.172 -0.095 -0.090 0.100 
O_382 0.101 0.065 0.112 0.012 -0.018 0.043 
O_383 0.117 0.097 0.080 -0.016 0.023 0.032 
O_383 0.248 0.243 0.268 -0.114 -0.111 0.162 
O_384 0.104 0.131 0.146 -0.005 -0.040 0.067 
O_385 0.089 0.128 0.094 -0.008 -0.017 0.063 
O_387 0.077 0.100 0.097 0.008 0.000 0.046 
O_389 0.052 0.062 0.036 0.011 0.008 0.038 
O_389 0.076 0.066 0.325 -0.017 0.038 0.043 
O_390 0.121 0.235 0.105 -0.013 -0.006 0.138 
O_391 0.212 0.470 0.263 -0.138 0.071 0.163 
O_392 0.104 0.110 0.061 0.018 0.017 0.034 
O_393 0.098 0.123 0.127 -0.016 0.011 0.069 
O_394 0.225 0.164 0.137 0.060 0.052 0.132 
O_395 0.506 0.363 0.111 0.039 0.085 0.334 
O_396 0.142 0.111 0.059 0.011 -0.005 0.071 
O_397 0.235 0.187 0.098 0.018 0.066 0.125 
O_398 0.122 0.112 0.085 0.020 0.050 0.065 
O_399 0.180 0.219 0.134 -0.090 -0.076 0.163 
O_400 0.139 0.262 0.205 -0.095 -0.012 0.078 
O_401 0.268 0.337 0.217 -0.136 -0.179 0.249 
O_402 0.053 0.072 0.081 -0.008 -0.009 0.032 
O_403 0.200 0.184 0.190 -0.001 -0.002 0.053 
O_404 0.178 0.192 0.326 0.053 0.032 0.101 
O_405 0.107 0.105 0.109 -0.029 -0.018 0.048 
O_406 0.097 0.129 0.116 -0.015 -0.022 0.028 
O_407 0.156 0.154 0.116 -0.025 -0.004 0.070 
O_409 0.207 0.106 0.121 -0.054 -0.094 0.107 
O_410 0.253 0.209 0.179 -0.067 0.037 0.120 
O_410 0.125 0.079 0.117 -0.023 0.004 0.068 
O_411 0.370 0.231 0.074 -0.038 -0.018 0.244 
O_412 0.174 0.157 0.140 0.020 -0.006 0.030 
O_413 0.084 0.089 0.070 0.017 -0.004 0.046 
O_414 0.128 0.103 0.053 0.016 0.016 0.082 
O_415 0.062 0.050 0.046 0.026 0.012 0.032 
O_416 0.079 0.069 0.073 0.017 0.000 0.025 
O_417 0.226 0.214 0.325 0.043 0.072 0.102 
O_418 0.066 0.082 0.033 0.008 0.011 0.047 
O_419 0.050 0.062 0.044 0.011 0.009 0.034 
O_420 0.203 0.281 0.176 0.115 0.078 0.198 
O_421 0.090 0.125 0.111 -0.004 -0.002 0.039 
O_424 0.315 0.179 0.354 0.044 0.098 0.178 
O_424 0.389 0.158 0.183 0.033 0.068 0.161 
O_425 0.434 0.514 0.317 -0.302 -0.218 0.368 
O_426 0.260 0.279 0.149 0.093 0.099 0.216 
O_426 0.267 0.308 0.248 -0.013 -0.047 0.180 
O_427 0.530 0.328 0.196 0.073 0.049 0.327 
O_428 0.679 0.145 0.463 -0.083 -0.180 0.202 
O_429 0.210 0.093 0.176 -0.008 -0.012 0.065 
O_430 0.279 0.492 0.171 -0.062 -0.022 0.168 
O_431 0.139 0.177 0.195 0.047 -0.050 0.023 
O_431 0.164 0.257 0.207 -0.039 0.052 0.015 
O_433 0.067 0.104 0.170 0.024 0.016 0.058 
O_434 0.163 0.189 0.066 0.008 0.000 0.085 
O_435 0.103 0.205 0.074 0.002 -0.017 0.052 
O_435 0.235 0.328 0.246 -0.018 -0.026 0.201 
O_437 0.250 0.225 0.164 0.062 0.015 0.105 
O_444 0.287 0.228 0.241 -0.001 -0.040 0.185 
O_444 0.339 0.353 0.321 0.125 0.018 -0.097 
O_445 0.526 0.374 0.290 0.150 0.152 0.299 
O_446 0.370 0.389 1.009 0.288 0.361 0.275 
O_447 0.346 0.375 0.103 -0.050 -0.056 0.179 
O_447 0.409 0.148 0.167 0.000 -0.099 0.100 
O_449 0.105 0.140 0.067 0.005 -0.013 0.084 
O_449 0.096 0.171 0.100 0.014 0.006 0.097 
O_450 0.207 0.097 0.166 -0.041 0.051 -0.003 
O_451 0.154 0.142 0.168 -0.008 -0.002 0.088 
O_452 0.177 0.130 0.244 -0.023 -0.069 -0.054 
O_454 0.194 0.206 0.139 0.104 0.031 0.102 
O_454 0.233 0.120 0.100 0.052 -0.017 0.086 
O_455 0.334 0.137 0.165 -0.059 -0.030 0.098 
O_457 0.485 0.413 0.460 -0.219 -0.089 0.291 
O_460 0.296 0.363 0.285 -0.190 -0.066 0.038 
O_461 0.213 0.515 0.415 0.128 0.173 0.224 
O_462 0.534 0.602 0.216 -0.011 -0.014 0.371 
O_464 0.321 0.127 0.168 -0.008 0.083 0.083 
O_464 0.246 0.529 0.278 -0.046 -0.074 0.125 
O_465 0.242 0.376 0.119 -0.048 -0.058 0.212 
O_466 0.247 0.191 0.302 0.004 0.087 0.087 
O_467 0.108 0.202 0.179 -0.024 0.034 0.093 
O_467 0.220 0.236 0.133 -0.012 0.015 0.024 
O_468 0.418 0.155 0.085 0.005 0.094 0.100 
O_471 0.721 0.524 0.337 0.076 -0.034 0.220 
O_475 0.224 0.214 0.144 -0.016 0.008 0.156 
O_476 0.211 0.222 0.393 -0.016 -0.126 0.119 
O_477 0.275 0.504 0.336 0.181 0.129 0.276 
O_478 0.220 0.133 0.372 0.041 0.099 0.026 
O_484 0.732 0.536 0.472 -0.164 0.086 0.404 
O_489 0.370 0.673 0.266 -0.069 -0.086 0.171 
O_495 0.153 0.140 0.149 0.051 0.015 0.011 
O_495 0.292 0.397 0.222 0.100 0.078 0.162 
O_496 0.184 0.285 0.830 0.070 -0.116 0.057 
O_499 0.507 0.816 0.420 -0.057 -0.275 0.205 
O_500 0.243 0.246 0.369 0.044 0.154 0.027 
O_507 0.201 0.210 0.488 0.087 0.109 0.152 
O_508 0.421 0.555 0.651 -0.261 -0.193 0.423 
O_515 0.084 0.073 0.059 0.018 0.015 0.032 
O_516 0.066 0.101 0.068 0.046 -0.017 0.042 
O_516 0.101 0.165 0.184 -0.024 -0.013 0.103 
O_517 0.065 0.081 0.094 -0.025 -0.010 0.022 
O_519 0.100 0.100 0.081 0.001 -0.007 0.067 
O_520 0.064 0.065 0.057 -0.021 0.003 0.029 
O_521 0.103 0.095 0.071 -0.007 -0.026 0.058 
O_521 0.165 0.088 0.224 -0.022 -0.095 0.063 
O_522 0.076 0.062 0.059 -0.016 -0.014 0.037 
O_523 0.051 0.102 0.061 -0.024 -0.010 0.052 
O_523 0.136 0.230 0.400 -0.127 -0.061 0.128 
O_524 0.052 0.080 0.094 -0.010 -0.001 0.015 
O_524 0.166 0.075 0.157 -0.020 0.052 0.056 
O_525 0.185 0.142 0.116 0.005 0.073 0.091 
O_529 0.082 0.119 0.061 0.028 0.008 0.027 
O_529 0.116 0.154 0.128 -0.005 0.030 0.009 
O_530 0.152 0.126 0.186 0.029 -0.030 0.061 
O_535 0.097 0.104 0.037 0.002 -0.007 0.056 
O_535 0.161 0.287 0.068 0.029 0.009 0.099 
O_539 0.129 0.094 0.091 -0.033 -0.035 0.075 
O_542 0.066 0.085 0.116 0.049 0.036 0.046 
O_543 0.104 0.113 0.082 -0.005 -0.005 0.066 
O_543 0.197 0.172 0.251 -0.050 -0.125 0.106 
O_549 0.159 0.123 0.581 0.010 0.219 0.050 
O_551 0.303 0.144 0.211 0.081 0.066 0.087 
O_553 0.307 0.307 0.107 -0.012 0.012 0.058 
O_554 0.178 0.100 0.033 0.009 0.000 0.053 
O_554 0.359 0.236 0.186 0.086 0.040 0.105 
O_555 0.188 0.222 0.233 0.053 0.063 0.157 
O_556 0.095 0.169 0.201 0.060 0.031 0.081 
O_556 0.109 0.285 0.221 0.036 0.012 0.061 
O_559 0.113 0.156 0.211 -0.080 -0.058 0.093 
O_559 0.187 0.226 0.253 0.080 -0.056 0.040 
O_561 0.243 0.164 0.200 0.057 0.061 0.116 
O_562 0.180 0.228 0.283 -0.125 -0.148 0.147 
O_562 0.307 0.282 0.309 0.002 -0.032 0.104 
O_565 0.108 0.208 0.418 0.221 0.135 0.128 
O_565 0.031 0.215 0.083 0.062 -0.011 0.060 
O_568 0.079 0.223 0.314 0.167 0.007 0.062 
O_568 0.264 0.153 0.242 0.086 0.131 0.152 
O_569 0.348 0.228 0.231 0.041 0.152 0.091 
O_571 0.098 0.271 0.284 -0.117 0.025 0.030 
O_571 0.083 0.120 0.095 -0.004 0.010 0.046 
O_577 0.085 0.113 0.132 0.023 -0.029 0.034 
O_578 0.179 0.123 0.090 -0.017 -0.024 0.082 
O_580 0.134 0.345 0.034 -0.049 -0.036 0.172 
O_580 0.257 0.264 0.222 -0.117 0.084 0.106 
O_584 0.139 0.148 0.100 0.019 0.018 0.092 
O_589 0.151 0.100 0.075 0.009 0.038 0.043 
O_591 0.126 0.160 0.088 0.017 0.022 0.101 
O_591 0.074 0.090 0.053 0.001 -0.001 0.050 
O_595 0.109 0.248 0.223 -0.072 -0.007 0.101 
O_595 0.091 0.203 0.187 -0.003 -0.011 0.086 
O_598 0.208 0.365 0.093 -0.025 -0.002 0.210 
O_598 0.160 0.415 0.165 -0.130 -0.026 0.179 
O_600 0.164 0.353 0.120 -0.114 -0.072 0.190 
O_600 0.179 0.245 0.231 -0.069 -0.069 0.150 
O_604 0.479 0.480 0.199 -0.035 0.028 0.380 
O_605 0.116 0.157 0.234 0.042 0.038 0.061 
O_605 0.320 0.211 0.138 0.038 -0.069 0.107 
O_608 0.345 0.158 0.084 -0.018 -0.014 0.134 
O_611 0.106 0.099 0.140 0.025 0.015 0.025 
O_613 0.266 0.213 0.205 0.088 0.104 0.095 
O_613 0.253 0.147 0.087 0.062 0.051 0.044 
O_616 0.271 0.155 0.368 -0.022 0.025 0.110 
O_616 0.064 0.086 0.156 0.029 -0.068 0.035 
O_621 0.609 0.218 0.371 0.124 0.358 0.235 
O_623 0.268 0.433 0.359 -0.110 0.010 0.126 
O_624 0.368 0.347 0.224 -0.015 -0.118 0.174 
O_625 0.070 0.055 0.059 -0.013 -0.007 0.031 
O_625 0.136 0.259 0.174 0.078 0.018 0.105 
O_626 0.070 0.071 0.052 -0.014 -0.009 0.045 
O_626 0.165 0.144 0.105 -0.037 0.000 0.107 
O_627 0.148 0.176 0.132 0.094 0.054 0.098 
O_627 0.174 0.130 0.211 0.081 0.079 0.080 
O_628 0.275 0.334 0.205 -0.069 -0.023 0.146 
O_628 0.485 0.272 0.482 0.081 -0.104 0.200 
O_630 0.394 0.234 0.250 0.070 -0.031 0.046 
O_630 0.321 0.352 0.291 -0.003 0.033 0.126 
O_631 0.083 0.127 0.104 -0.031 -0.005 0.042 
O_631 0.117 0.116 0.109 -0.018 -0.043 0.046 
O_632 0.106 0.091 0.193 -0.060 -0.007 0.048 
O_632 0.092 0.101 0.051 -0.010 -0.005 0.036 
O_633 0.137 0.098 0.227 -0.054 -0.102 0.074 
O_633 0.119 0.107 0.258 -0.094 -0.058 0.030 
O_634 0.124 0.174 0.061 0.020 -0.013 0.058 
O_634 0.243 0.218 0.107 -0.039 -0.064 0.165 
O_636 0.124 0.113 0.202 0.054 0.034 0.084 
O_636 0.169 0.200 0.197 0.123 0.081 0.154 
O_637 0.241 0.214 0.408 -0.153 0.035 0.041 
O_638 0.138 0.198 0.099 0.055 0.025 0.131 
O_638 0.141 0.347 0.162 0.173 0.091 0.202 
O_639 0.122 0.334 0.104 0.055 0.026 0.158 
O_640 0.174 0.113 0.153 0.018 -0.020 0.032 
O_641 0.211 0.212 0.120 0.012 -0.053 0.105 
O_641 0.321 0.148 0.190 -0.062 -0.037 0.098 
O_642 0.436 0.266 0.134 -0.015 -0.023 0.244 
O_643 0.206 0.377 0.191 -0.118 -0.060 0.205 
O_643 0.207 0.262 0.173 -0.105 -0.068 0.186 
O_644 0.455 0.134 0.346 -0.092 -0.290 0.146 
O_645 0.406 0.609 0.245 0.102 -0.038 0.231 
O_646 0.265 0.377 0.135 -0.048 -0.032 0.271 
O_647 0.155 0.108 0.404 -0.060 0.096 0.008 
O_648 0.176 0.138 0.266 -0.089 -0.111 0.046 
O_648 0.353 0.213 0.357 -0.101 -0.175 0.018 
O_649 0.800 0.504 0.378 -0.244 -0.004 0.203 
O_650 0.221 0.185 0.209 -0.063 -0.150 0.035 
O_651 0.321 0.497 0.436 0.294 0.152 0.302 
O_652 0.305 0.226 0.417 -0.143 -0.102 0.234 
O_657 0.152 0.146 0.222 0.026 -0.019 0.040 
O_657 0.173 0.189 0.107 -0.016 -0.006 0.091 
O_658 0.136 0.060 0.051 -0.005 -0.008 0.031 
O_658 0.319 0.220 0.131 -0.014 0.015 0.205 
O_659 0.118 0.283 0.142 -0.087 -0.017 0.104 
O_659 0.130 0.209 0.201 0.075 0.035 0.042 
O_661 0.253 0.256 0.276 0.110 -0.105 0.136 
O_661 0.171 0.194 0.069 0.068 0.039 0.159 
O_662 0.070 0.221 0.123 -0.037 0.006 0.022 
O_662 0.262 0.199 0.133 -0.012 -0.037 0.138 
O_663 0.236 0.248 0.069 0.030 0.013 0.127 
O_663 0.284 0.493 0.179 0.194 0.012 0.201 
O_664 0.025 0.140 0.436 0.061 0.006 0.004 
O_665 0.120 0.121 0.069 -0.014 -0.012 0.007 
O_666 0.174 0.189 0.124 -0.029 -0.010 0.048 
O_667 0.183 0.235 0.122 0.042 0.077 0.110 
O_667 0.130 0.124 0.112 0.008 0.035 0.087 
O_668 0.166 0.497 0.289 0.013 0.005 0.090 
O_668 0.163 0.188 0.168 0.000 -0.029 0.045 
O_669 0.267 0.415 0.150 0.102 0.112 0.233 
O_670 0.308 0.579 0.278 0.014 -0.121 0.133 
O_671 0.225 0.336 0.130 0.016 0.006 0.209 
O_672 0.203 0.289 0.262 0.124 -0.053 0.133 
O_672 0.315 0.353 0.124 0.079 0.055 0.145 
O_674 0.417 0.219 0.404 -0.183 -0.371 0.214 
O_675 0.276 0.139 0.144 -0.024 -0.094 0.111 
O_677 0.397 0.320 0.180 -0.070 -0.037 0.282 
O_678 0.222 0.547 0.165 0.054 0.020 0.185 
O_678 0.286 0.299 0.142 -0.025 -0.060 0.136 
O_679 0.110 0.237 0.131 0.066 0.035 0.051 
O_681 0.277 0.091 0.381 0.031 -0.056 0.039 
O_683 0.218 0.417 0.206 0.009 -0.067 0.201 
O_685 0.356 0.287 0.257 -0.017 -0.060 0.033 
O_685 0.220 0.121 0.141 0.022 -0.048 0.087 
O_686 0.148 0.126 0.374 0.088 0.057 0.073 
O_686 0.305 0.506 0.148 0.016 -0.013 0.233 
O_687 0.131 0.212 0.287 -0.131 -0.055 0.072 
O_688 0.352 0.187 0.235 -0.089 -0.181 0.133 
O_690 0.692 0.924 0.659 -0.377 -0.539 0.429 
O_691 0.273 0.546 0.185 0.176 0.079 0.287 
O_691 0.261 0.352 0.202 0.004 -0.016 0.203 
O_692 0.306 0.216 0.341 0.108 0.168 0.214 
O_692 0.047 0.121 0.068 -0.020 -0.009 0.058 
O_693 0.243 0.187 0.144 -0.001 -0.002 0.185 
O_693 0.353 0.248 0.062 -0.020 -0.047 0.287 
O_694 0.221 0.316 0.280 0.232 0.173 0.154 
O_694 0.209 0.239 0.350 0.213 0.091 0.098 
O_695 0.264 0.223 0.175 -0.045 -0.002 -0.069 
O_695 0.164 0.417 0.259 0.131 0.101 -0.008 
O_696 0.348 0.443 0.164 -0.149 0.126 0.051 
O_696 0.194 0.309 0.098 -0.023 -0.003 0.137 
O_697 0.292 0.381 0.272 0.068 -0.011 0.200 
O_697 0.150 0.163 0.225 0.007 0.026 0.109 
O_698 0.241 0.108 0.075 -0.001 -0.040 0.079 
O_698 0.111 0.202 0.111 0.057 -0.010 0.055 
O_699 0.236 0.321 0.256 0.142 0.075 0.144 
O_699 0.346 0.345 0.392 0.019 -0.188 0.175 
O_700 0.170 0.149 0.198 0.021 0.046 0.070 
O_700 0.176 0.244 0.160 -0.018 -0.007 0.036 
O_701 0.153 0.439 0.192 -0.141 0.019 0.154 
O_701 0.094 0.132 0.090 -0.007 0.016 0.062 
O_702 0.677 0.671 0.789 0.180 0.220 0.601 
O_703 0.351 0.187 0.401 -0.062 -0.091 0.211 
O_703 0.448 0.234 0.168 0.029 0.053 0.210 
O_704 0.349 0.394 0.291 0.179 0.149 0.323 
O_704 0.409 0.445 0.321 -0.082 0.160 0.233 
O_705 0.249 0.272 0.188 -0.055 -0.021 0.082 
O_706 0.178 0.366 0.130 -0.055 0.004 0.099 
O_708 0.519 0.269 0.205 -0.017 0.095 0.308 
O_709 0.399 0.110 0.430 -0.061 0.233 0.062 
O_710 0.259 0.250 0.188 0.097 0.075 0.117 
O_711 0.289 0.272 0.526 -0.193 0.015 0.112 
O_712 0.402 0.362 0.132 0.013 -0.048 0.148 
O_712 0.088 0.105 0.076 -0.020 -0.032 0.065 
O_713 0.356 0.289 0.299 -0.073 -0.060 0.230 
O_713 0.342 0.128 0.216 0.071 0.053 0.082 
O_714 0.439 0.982 0.294 0.183 0.029 0.362 
O_715 0.535 0.292 0.315 0.153 0.276 0.260 
O_716 0.310 0.340 0.247 -0.001 0.035 0.046 
O_716 0.140 0.186 0.222 -0.058 -0.034 0.096 
O_717 0.195 0.163 0.569 -0.084 -0.033 0.100 
O_719 0.260 0.203 0.206 -0.034 -0.105 0.148 
O_719 0.113 0.086 0.093 -0.012 -0.015 0.064 
O_720 0.160 0.114 0.085 0.013 0.005 0.095 
O_720 0.144 0.068 0.250 0.047 -0.098 0.026 
O_721 0.164 0.181 0.162 -0.014 -0.032 0.041 
O_721 0.098 0.111 0.133 0.029 0.009 0.019 
O_722 0.141 0.225 0.184 -0.011 -0.020 0.040 
O_723 0.412 0.494 0.160 0.194 -0.038 0.201 
O_723 0.403 0.319 0.092 -0.006 -0.046 0.218 
O_724 0.227 0.375 0.211 -0.129 -0.042 0.200 
O_724 0.286 0.374 0.300 0.063 0.121 0.108 
O_726 0.186 1.150 0.296 0.326 -0.027 0.212 
O_727 0.298 0.196 0.158 -0.016 -0.103 0.136 
O_730 0.219 0.101 0.583 -0.094 0.221 0.007 
O_731 0.652 0.432 0.581 -0.159 -0.005 0.450 
O_732 0.202 0.122 0.288 0.127 -0.073 -0.024 
O_732 0.173 0.214 0.244 -0.061 0.006 0.105 
O_733 0.042 0.417 0.324 0.081 0.039 0.065 
O_734 0.220 0.964 0.107 0.028 -0.036 0.388 
O_736 0.177 0.242 0.213 0.013 -0.035 0.072 
O_737 0.173 0.170 0.263 -0.089 -0.008 0.022 
O_737 0.206 0.284 0.298 0.023 -0.163 -0.003 
O_738 0.203 0.169 0.078 0.019 -0.020 0.102 
O_739 0.157 0.162 0.557 0.059 -0.045 0.004 
O_742 0.477 0.295 0.365 0.167 0.272 0.289 
O_744 0.196 0.199 0.283 0.161 0.120 0.116 
O_753 0.448 0.848 0.339 -0.013 -0.028 0.439 
O_754 0.311 0.250 0.441 -0.164 0.077 0.125 
O_754 0.300 0.240 0.189 -0.099 0.068 -0.035 
O_755 0.137 0.229 0.296 0.060 0.035 0.000 
O_755 0.243 0.274 0.622 0.134 0.102 0.148 
O_756 0.380 0.393 0.701 -0.046 0.006 0.328 
O_756 0.361 0.153 0.414 -0.017 -0.135 -0.017 
O_757 0.264 0.138 0.328 0.122 -0.014 0.044 
O_758 0.894 0.208 0.365 -0.172 -0.080 0.204 
O_759 0.368 0.490 0.515 -0.149 -0.179 0.318 
O_759 0.535 0.504 0.552 -0.016 -0.123 0.289 
O_760 0.409 0.137 0.461 -0.095 -0.113 0.022 
O_761 0.396 0.393 0.297 0.047 -0.012 0.316 
O_762 0.190 0.383 0.062 0.089 0.023 0.056 
O_763 0.265 0.198 0.076 -0.044 0.024 0.122 
O_764 0.166 0.267 0.529 0.258 0.163 0.135 
O_765 0.392 0.194 0.248 0.094 0.123 0.183 
O_766 0.630 0.290 0.173 0.133 0.215 0.295 
O_766 0.476 0.362 0.359 0.084 -0.032 0.152 
O_767 0.336 0.317 0.430 0.009 -0.091 0.151 
O_767 0.373 0.333 0.391 -0.042 0.045 0.155 
O_772 0.257 0.225 0.245 0.067 -0.045 -0.047 
O_772 0.120 0.137 0.204 0.083 0.008 0.010 
O_774 0.592 0.358 0.364 -0.263 0.093 0.174 
O_775 0.564 0.345 0.384 -0.222 -0.366 0.362 
O_777 0.307 0.214 0.241 -0.036 0.112 -0.106 
O_782 0.392 0.319 0.244 0.013 0.046 0.158 
O_782 0.287 0.316 0.259 -0.004 0.029 0.100 
O_784 0.526 0.824 0.255 0.067 0.125 0.339 
O_785 0.272 0.234 0.305 0.025 0.122 0.169 
O_785 0.218 0.448 0.398 0.002 -0.056 0.124 
O_786 0.444 0.315 0.361 -0.188 -0.197 0.237 
O_787 0.721 0.190 0.594 0.012 -0.436 0.208 
O_789 0.279 0.183 0.243 0.061 0.100 0.082 
O_793 0.135 0.535 0.239 -0.055 -0.063 0.124 
O_797 0.245 0.218 0.216 -0.058 -0.082 0.072 
O_800 0.549 0.199 0.448 -0.196 0.205 -0.077 
O_805 0.569 0.300 0.440 0.013 -0.141 0.266 
O_807 0.169 0.182 0.112 -0.072 -0.041 0.110 
O_808 0.177 0.242 0.137 -0.014 -0.005 0.040 
O_809 0.190 0.129 0.116 -0.049 -0.055 0.074 
O_810 0.122 0.192 0.133 -0.034 -0.023 0.102 
O_815 0.168 0.151 0.595 0.008 0.079 0.030 
O_816 0.404 0.404 0.202 0.118 -0.118 0.249 
O_816 0.437 0.437 0.351 0.113 -0.113 0.228 
O_824 0.312 0.583 0.340 0.352 0.199 0.292 
O_825 0.125 0.113 0.120 0.007 -0.046 0.053 
O_826 0.039 0.053 0.017 0.019 0.014 0.027 
O_826 0.204 0.215 0.110 0.006 0.093 0.054 
O_827 0.046 0.067 0.068 0.020 -0.006 0.017 
O_827 0.287 0.194 0.330 0.017 -0.072 0.190 
O_829 0.148 0.232 0.489 0.177 0.056 0.132 
O_830 0.313 0.417 0.323 -0.131 -0.108 0.174 
O_830 0.506 0.118 0.272 0.011 -0.242 0.063 
O_831 0.183 0.250 0.283 -0.065 0.049 0.088 
O_832 0.255 0.403 0.157 -0.049 -0.013 0.210 
O_833 0.125 0.149 0.201 -0.039 0.042 0.047 
O_833 0.155 0.121 0.165 -0.023 -0.024 0.059 
O_834 0.151 0.206 0.326 -0.131 -0.038 0.030 
O_835 0.142 0.195 0.098 -0.020 -0.040 0.074 
O_842 0.286 0.206 0.213 -0.098 -0.096 0.200 
O_843 0.292 0.385 0.262 0.120 -0.053 0.182 
O_844 0.370 0.320 0.399 -0.002 -0.009 0.236 
O_844 0.423 0.216 0.522 0.108 0.241 0.227 
O_849 0.283 0.391 0.341 0.052 -0.081 0.227 
O_849 0.297 0.384 0.237 0.107 -0.153 0.042 
O_850 0.307 0.241 0.299 0.019 -0.033 0.179 
O_851 0.525 0.684 0.464 0.146 0.262 0.361 
O_853 0.447 0.669 0.423 -0.187 0.221 0.168 
O_854 0.195 0.391 0.328 -0.095 -0.059 -0.049 
O_855 0.882 1.127 0.290 0.009 0.084 0.798 
O_856 0.162 0.462 0.190 -0.021 -0.079 -0.043 
O_857 0.760 0.726 0.778 -0.108 0.068 0.325 
O_858 0.657 0.556 0.503 0.391 0.151 0.282 
O_859 0.247 0.302 0.230 -0.040 -0.119 0.004 
O_860 0.541 0.277 0.671 -0.178 -0.189 0.308 
O_861 0.442 0.660 0.203 0.018 0.184 0.226 
O_861 0.283 0.196 0.202 -0.075 -0.134 0.139 
O_862 0.254 0.467 0.320 -0.051 0.008 0.074 
O_862 0.170 0.169 0.087 -0.033 0.021 0.017 
O_863 0.475 0.455 1.267 -0.453 0.163 0.065 
O_864 0.610 0.178 0.414 -0.074 -0.154 0.210 
O_865 0.240 0.265 0.230 -0.069 -0.041 0.150 
O_867 0.200 0.418 0.061 -0.062 -0.005 0.242 
O_868 0.461 0.653 0.156 -0.070 0.144 0.216 
O_868 0.217 0.199 0.132 -0.079 0.025 0.107 
O_870 0.120 0.170 0.075 -0.003 0.009 0.105 
O_871 0.708 0.434 0.269 -0.207 -0.240 0.425 
O_874 0.272 0.306 0.270 0.101 0.023 0.205 
O_874 0.126 0.265 0.154 0.015 -0.006 0.102 
O_875 0.366 0.176 0.245 -0.080 -0.013 0.151 
O_876 0.535 0.185 0.427 -0.050 0.203 0.029 
O_877 0.046 0.044 0.104 -0.005 0.000 0.005 
O_878 0.222 0.144 0.122 0.041 0.024 0.121 
O_878 0.287 0.327 0.222 -0.035 -0.075 0.206 
O_879 0.322 0.337 0.271 0.046 -0.152 0.110 
O_880 0.068 0.089 0.128 0.006 -0.003 0.059 
O_881 0.261 0.458 0.110 0.039 0.039 0.267 
O_882 0.427 0.353 0.289 0.095 0.103 0.027 
O_883 0.505 0.285 0.316 0.100 0.067 0.198 
O_883 0.174 0.301 0.279 0.093 0.007 0.165 
O_884 0.151 0.213 0.131 -0.041 0.028 0.086 
O_884 0.346 0.201 0.120 0.088 0.141 0.198 
O_885 0.162 0.244 0.162 -0.006 0.018 0.142 
O_886 0.493 0.366 0.282 0.022 0.065 0.284 
O_886 0.445 0.414 0.429 0.112 -0.022 0.149 
O_887 0.366 0.515 0.344 -0.016 0.082 0.298 
O_887 0.427 0.232 0.204 -0.048 -0.048 0.161 
O_888 0.757 0.566 0.341 -0.335 -0.224 0.382 
O_889 0.343 0.557 0.368 -0.177 -0.118 0.357 
O_892 0.453 0.460 0.345 -0.063 -0.143 0.359 
O_893 0.521 0.214 0.313 0.095 -0.235 -0.043 
O_894 0.884 0.264 0.919 0.048 0.073 0.249 
O_895 0.349 0.247 0.064 -0.021 -0.055 0.263 
O_897 0.231 0.432 0.173 0.008 -0.138 0.171 
O_898 0.472 0.442 0.396 -0.165 -0.274 0.236 
O_899 0.471 0.924 0.170 -0.117 0.009 0.412 
O_900 0.553 0.443 0.247 -0.107 -0.139 0.402 
O_901 0.291 0.209 0.452 0.005 -0.129 0.145 
O_903 0.419 0.236 0.373 -0.150 -0.100 0.166 
O_903 0.265 0.297 0.327 -0.068 -0.106 0.223 
O_905 0.171 0.562 0.532 0.035 -0.058 0.215 
O_906 0.225 0.465 0.207 -0.070 0.005 0.093 
O_906 0.278 0.487 0.214 0.078 -0.005 0.239 
O_907 0.784 0.366 0.756 0.057 0.164 0.424 
O_908 0.462 0.244 0.377 -0.195 -0.236 0.278 
O_910 0.190 0.175 0.150 0.033 0.023 0.133 
O_911 0.473 0.383 0.313 -0.068 0.159 0.225 
O_911 0.477 0.568 0.421 0.033 0.084 0.268 
O_917 0.313 0.303 0.169 -0.019 -0.081 0.095 
O_918 0.111 0.185 0.077 -0.012 -0.018 0.100 
O_919 0.115 0.311 0.141 -0.107 0.003 0.095 
O_919 0.190 0.159 0.087 0.011 0.033 0.083 
O_920 0.109 0.065 0.252 -0.045 -0.005 0.068 
O_920 0.248 0.154 0.472 -0.023 0.071 0.145 
O_921 0.128 0.242 0.267 -0.018 0.084 0.000 
O_921 0.246 0.265 0.350 0.027 0.066 0.115 
O_922 0.094 0.107 0.169 -0.032 0.056 0.003 
O_923 0.072 0.106 0.042 -0.028 -0.013 0.047 
O_926 0.424 0.354 0.158 -0.020 -0.006 0.297 
O_927 0.448 0.327 0.219 0.070 0.111 0.230 
O_928 0.369 0.348 0.466 -0.220 -0.175 0.050 
O_929 0.144 0.237 0.197 0.064 0.042 0.066 
O_937 0.489 0.563 0.558 -0.011 0.020 0.191 
O1_938 0.198 0.262 0.262 0.079 -0.027 0.035 
O_940 0.318 0.301 0.115 -0.106 -0.069 0.154 
O_940 0.265 0.276 0.247 -0.122 -0.081 0.211 
O_941 0.256 0.527 0.322 0.054 0.099 0.198 
O_941 0.392 0.390 0.392 -0.006 -0.085 0.229 
O_942 0.241 0.219 0.270 -0.038 -0.087 0.172 
O3_943 0.083 0.165 0.083 -0.007 -0.016 0.060 
O_944 0.116 0.113 0.184 0.067 0.077 0.053 
O_945 0.175 0.314 0.482 0.142 0.082 0.147 
O_946 0.513 0.565 0.663 -0.169 -0.006 0.370 
O_947 0.270 0.252 0.279 -0.119 -0.197 0.160 
O_948 0.220 0.277 0.212 0.129 0.114 -0.037 
O_949 0.365 0.378 0.509 0.143 -0.032 0.186 
O_950 0.266 0.194 0.197 0.044 -0.009 0.049 
O_951 0.210 0.089 0.107 -0.016 0.018 0.066 
O_952 0.096 0.064 0.105 -0.022 0.023 0.055 
O_953 0.088 0.053 0.111 -0.026 0.014 0.052 
O_954 0.189 0.135 0.125 -0.014 -0.009 0.118 
O_954 0.265 0.129 0.158 -0.050 0.004 0.140 
O_956 0.626 0.562 0.218 0.009 0.047 0.329 
O_957 0.324 0.186 0.394 -0.086 -0.063 0.106 
O_962 0.419 0.229 0.326 0.004 0.113 0.215 
O_963 0.640 0.567 0.571 -0.131 -0.185 0.440 
O_965 0.875 0.752 0.857 0.289 0.017 0.534 
O_966 0.437 0.602 0.260 0.226 0.113 0.295 
O_967 0.306 0.215 0.247 -0.066 -0.037 0.112 
O_968 0.356 0.227 0.292 -0.128 -0.131 0.055 
O_969 0.188 0.275 0.200 -0.104 -0.014 0.125 
O_970 0.272 0.468 0.190 0.064 0.006 0.110 
O_971 0.453 0.435 0.354 0.123 -0.145 0.224 
O_972 0.510 0.268 0.476 0.136 0.045 0.215 
O_973 0.223 0.162 0.219 0.102 0.134 0.101 
O_974 0.231 0.172 0.195 -0.052 -0.070 0.083 
O_975 0.491 0.263 0.301 -0.177 -0.168 0.134 
O_976 0.297 0.286 0.220 -0.079 -0.116 0.152 
O_977 0.360 0.460 0.296 -0.035 0.071 0.266 
O_980 0.316 0.387 0.165 0.034 0.049 0.316 
O_983 0.229 0.303 0.230 -0.075 0.006 0.058 
O_987 0.503 0.567 0.552 0.177 -0.095 0.381 
 
_geom_special_details 
; 
 All esds (except the esd in the dihedral angle between two l.s. planes) 
 are estimated using the full covariance matrix.  The cell esds are taken 
 into account individually in the estimation of esds in distances, angles 
 and torsion angles; correlations between esds in cell parameters are only 
 used when they are defined by crystal symmetry.  An approximate (isotropic) 
 treatment of cell esds is used for estimating esds involving l.s. planes. 
; 
 
loop_ 
 _geom_bond_atom_site_label_1 
 _geom_bond_atom_site_label_2 
 _geom_bond_distance 
 _geom_bond_site_symmetry_2 
 _geom_bond_publ_flag 
CB_1 CA_1 1.530(5) . ? 
CB_1 HB1_1 0.9800 . ? 
CB_1 HB2_1 0.9800 . ? 
CB_1 HB3_1 0.9800 . ? 
C_1 O_1 1.2414 . ? 
C_1 N_2 1.339(3) . ? 
C_1 CA_1 1.508(5) . ? 
N_1 CA_1 1.464(6) . ? 
N_1 H0A_1 0.9100 . ? 
N_1 H0B_1 0.9100 . ? 
N_1 H0C_1 0.9100 . ? 
CA_1 HA_1 1.0000 . ? 
N_2 CA_2 1.452(5) . ? 
N_2 H0_2 0.8800 . ? 
CA_2 C_2 1.525(5) . ? 
CA_2 CB_2 1.525(5) . ? 
CA_2 HA_2 1.0000 . ? 
CB_2 CG_2 1.506(5) . ? 
CB_2 HB1_2 0.9900 . ? 
CB_2 HB2_2 0.9900 . ? 
CG_2 OD1_2 1.242(5) . ? 
CG_2 ND2_2 1.326(5) . ? 
ND2_2 HD2A_2 0.8800 . ? 
ND2_2 HD2B_2 0.8800 . ? 
C_2 O_2 1.238(5) . ? 
C_2 N_3 1.339(5) . ? 
N_3 CA_3 1.462(4) . ? 
N_3 H0_3 0.8800 . ? 
CA_3 C_3 1.519(5) . ? 
CA_3 CB_3 1.537(5) . ? 
CA_3 HA_3 1.0000 . ? 
CB_3 CG2_3 1.525(5) . ? 
CB_3 CG1_3 1.526(6) . ? 
CB_3 HB_3 1.0000 . ? 
CG2_3 HG2A_3 0.9800 . ? 
CG2_3 HG2B_3 0.9800 . ? 
CG2_3 HG2C_3 0.9800 . ? 
CG1_3 CD1_3 1.517(7) . ? 
CG1_3 HG1A_3 0.9900 . ? 
CG1_3 HG1B_3 0.9900 . ? 
CD1_3 HD1A_3 0.9800 . ? 
CD1_3 HD1B_3 0.9800 . ? 
CD1_3 HD1C_3 0.9800 . ? 
C_3 O_3 1.227(4) . ? 
C_3 N_4 1.351(5) . ? 
N_4 CA_4 1.458(5) . ? 
N_4 H0_4 0.8800 . ? 
CA_4 C_4 1.532(5) . ? 
CA_4 CB_4 1.540(5) . ? 
CA_4 HA_4 1.0000 . ? 
CB_4 CG2_4 1.529(5) . ? 
CB_4 CG1_4 1.530(6) . ? 
CB_4 HB_4 1.0000 . ? 
CG1_4 HG1A_4 0.9800 . ? 
CG1_4 HG1B_4 0.9800 . ? 
CG1_4 HG1C_4 0.9800 . ? 
CG2_4 HG2A_4 0.9800 . ? 
CG2_4 HG2B_4 0.9800 . ? 
CG2_4 HG2C_4 0.9800 . ? 
C_4 O_4 1.232(4) . ? 
C_4 N_5 1.334(4) . ? 
N_5 CA_5 1.456(4) . ? 
N_5 H0_5 0.8800 . ? 
CA_5 C_5 1.514(5) . ? 
CA_5 HA1_5 0.9900 . ? 
CA_5 HA2_5 0.9900 . ? 
C_5 O_5 1.242(4) . ? 
C_5 N_6 1.328(4) . ? 
N_6 CA_6 1.449(4) . ? 
N_6 H0_6 0.8800 . ? 
CA_6 C_6 1.513(5) . ? 
CA_6 HA1_6 0.9900 . ? 
CA_6 HA2_6 0.9900 . ? 
C_6 O_6 1.234(4) . ? 
C_6 N_7 1.326(5) . ? 
N_7 CA_7 1.453(4) . ? 
N_7 H0_7 0.8800 . ? 
CA_7 C_7 1.525(5) . ? 
CA_7 CB_7 1.536(5) . ? 
CA_7 HA_7 1.0000 . ? 
CB_7 CG1_7 1.528(5) . ? 
CB_7 CG2_7 1.531(5) . ? 
CB_7 HB_7 1.0000 . ? 
CG2_7 HG2A_7 0.9800 . ? 
CG2_7 HG2B_7 0.9800 . ? 
CG2_7 HG2C_7 0.9800 . ? 
CG1_7 CD1_7 1.516(5) . ? 
CG1_7 HG1A_7 0.9900 . ? 
CG1_7 HG1B_7 0.9900 . ? 
CD1_7 HD1A_7 0.9800 . ? 
CD1_7 HD1B_7 0.9800 . ? 
CD1_7 HD1C_7 0.9800 . ? 
C_7 O_7 1.234(4) . ? 
C_7 N_8 1.339(4) . ? 
N_8 CA_8 1.442(5) . ? 
N_8 H0_8 0.8800 . ? 
CA_8 C_8 1.524(5) . ? 
CA_8 CB_8 1.545(5) . ? 
CA_8 HA_8 1.0000 . ? 
CB_8 CG_8 1.512(6) . ? 
CB_8 HB1_8 0.9900 . ? 
CB_8 HB2_8 0.9900 . ? 
CG_8 CD_8 1.485(6) . ? 
CG_8 HG1_8 0.9900 . ? 
CG_8 HG2_8 0.9900 . ? 
CD_8 OE1_8 1.239(7) . ? 
CD_8 OE2_8 1.271(7) . ? 
C_8 O_8 1.242(4) . ? 
C_8 N_9 1.319(5) . ? 
N_9 CA_9 1.458(5) . ? 
N_9 H0_9 0.8800 . ? 
CA_9 C_9 1.529(5) . ? 
CA_9 CB_9 1.541(5) . ? 
CA_9 HA_9 1.0000 . ? 
CB_9 CG_9 1.498(5) . ? 
CB_9 HB1_9 0.9900 . ? 
CB_9 HB2_9 0.9900 . ? 
CG_9 CD1_9 1.383(5) . ? 
CG_9 CD2_9 1.394(5) . ? 
CD1_9 CE1_9 1.387(5) . ? 
CD1_9 HD1_9 0.9500 . ? 
CE1_9 CZ_9 1.380(5) . ? 
CE1_9 HE1_9 0.9500 . ? 
CD2_9 CE2_9 1.389(5) . ? 
CD2_9 HD2_9 0.9500 . ? 
CE2_9 CZ_9 1.380(5) . ? 
CE2_9 HE2_9 0.9500 . ? 
CZ_9 OH_9 1.376(4) . ? 
OH_9 HH_9 0.8400 . ? 
C_9 O_9 1.239(4) . ? 
C_9 N_10 1.336(5) . ? 
N_10 CA_10 1.450(5) . ? 
N_10 H0_10 0.8800 . ? 
CA_10 CB_10 1.521(5) . ? 
CA_10 C_10 1.531(6) . ? 
CA_10 HA_10 1.0000 . ? 
CB_10 OG_10 1.435(6) . ? 
CB_10 HB1_10 0.9900 . ? 
CB_10 HB2_10 0.9900 . ? 
OG_10 HG_10 0.8400 . ? 
C_10 O_10 1.234(5) . ? 
C_10 N_11 1.338(5) . ? 
N_11 CA_11 1.458(5) . ? 
N_11 H0_11 0.8800 . ? 
CA_11 C_11 1.525(5) . ? 
CA_11 CB_11 1.537(5) . ? 
CA_11 HA_11 1.0000 . ? 
CB_11 CG2_11 1.513(6) . ? 
CB_11 CG1_11 1.536(5) . ? 
CB_11 HB_11 1.0000 . ? 
CG2_11 HG2A_11 0.9800 . ? 
CG2_11 HG2B_11 0.9800 . ? 
CG2_11 HG2C_11 0.9800 . ? 
CG1_11 CD1_11 1.530(6) . ? 
CG1_11 HG1A_11 0.9900 . ? 
CG1_11 HG1B_11 0.9900 . ? 
CD1_11 HD1A_11 0.9800 . ? 
CD1_11 HD1B_11 0.9800 . ? 
CD1_11 HD1C_11 0.9800 . ? 
C_11 O_11 1.234(5) . ? 
C_11 N_12 1.329(6) . ? 
N_12 CA_12 1.474(5) . ? 
N_12 H0_12 0.8800 . ? 
CA_12 C_12 1.504(7) . ? 
CA_12 CB_12 1.520(7) . ? 
CA_12 HA_12 1.0000 . ? 
CB_12 CG_12 1.513(8) . ? 
CB_12 HB1_12 0.9900 . ? 
CB_12 HB2_12 0.9900 . ? 
CG_12 OD1_12 1.231(8) . ? 
CG_12 ND2_12 1.291(9) . ? 
ND2_12 HD2A_12 0.8800 . ? 
ND2_12 HD2B_12 0.8800 . ? 
C_12 O_12 1.235(5) . ? 
C_12 N_13 1.356(6) . ? 
N_13 CA_13 1.451(6) . ? 
N_13 H0_13 0.8800 . ? 
CA_13 C_13 1.518(7) . ? 
CA_13 CB_13 1.549(7) . ? 
CA_13 HA_13 1.0000 . ? 
CB_13 CG_13 1.484(8) . ? 
CB_13 HB1_13 0.9900 . ? 
CB_13 HB2_13 0.9900 . ? 
CG_13 OD1_13 1.259(8) . ? 
CG_13 ND2_13 1.276(9) . ? 
ND2_13 HD2A_13 0.8800 . ? 
ND2_13 HD2B_13 0.8800 . ? 
C_13 O_13 1.232(5) . ? 
C_13 N_14 1.331(6) . ? 
N_14 CA_14 1.452(6) . ? 
N_14 H0_14 0.8800 . ? 
CA_14 CB_14 1.496(8) . ? 
CA_14 C_14 1.534(7) . ? 
CA_14 HA_14 1.0000 . ? 
CB_14 HB1_14 0.9800 . ? 
CB_14 HB2_14 0.9800 . ? 
CB_14 HB3_14 0.9800 . ? 
C_14 O_14 1.242(6) . ? 
C_14 N_15 1.302(6) . ? 
N_15 CA_15 1.444(6) . ? 
N_15 H0_15 0.8800 . ? 
CA_15 CB_15 1.528(6) . ? 
CA_15 C_15 1.529(5) . ? 
CA_15 HA_15 1.0000 . ? 
CB_15 OG_15 1.420(5) . ? 
CB_15 HB1_15 0.9900 . ? 
CB_15 HB2_15 0.9900 . ? 
OG_15 HG_15 0.8400 . ? 
C_15 O_15 1.218(5) . ? 
C_15 N_16 1.340(5) . ? 
N_16 CA_16 1.39(3) . ? 
N_16 CA_16 1.490(10) . ? 
N_16 H0_16 0.8800 . ? 
CA_16 CB_16 1.494(15) . ? 
CA_16 C_16 1.56(2) . ? 
CA_16 HA_16 1.0000 . ? 
CA_16 C_16 1.53(5) . ? 
CA_16 CB_16 1.56(4) . ? 
CA_16 HA1_16 1.0000 . ? 
CB_16 CG_16 1.520(11) . ? 
CB_16 HB1_16 0.9900 . ? 
CB_16 HB2_16 0.9900 . ? 
CG_16 CD1_16 1.501(10) . ? 
CG_16 CD2_16 1.509(12) . ? 
CG_16 HG_16 1.0000 . ? 
CD1_16 HD1A_16 0.9800 . ? 
CD1_16 HD1B_16 0.9800 . ? 
CD1_16 HD1C_16 0.9800 . ? 
CD2_16 HD2A_16 0.9800 . ? 
CD2_16 HD2B_16 0.9800 . ? 
CD2_16 HD2C_16 0.9800 . ? 
C_16 O_16 1.196(17) . ? 
C_16 N_17 1.318(8) . ? 
C_16 O_16 1.26(4) . ? 
C_16 N_17 1.329(18) . ? 
N_17 CA_17 1.446(17) . ? 
N_17 CA_17 1.450(7) . ? 
N_17 CA_17 1.454(19) . ? 
N_17 H0_17 0.8800 . ? 
C_17 O_17 1.228(4) . ? 
C_17 N_18 1.333(4) . ? 
C_17 CA_17 1.518(16) . ? 
C_17 CA_17 1.521(18) . ? 
C_17 CA_17 1.526(7) . ? 
CA_17 CB_17 1.560(8) . ? 
CA_17 HA_17 1.0000 . ? 
CA_17 CB_17 1.523(18) . ? 
CA_17 HA1_17 1.0000 . ? 
CA_17 CB_17 1.532(19) . ? 
CA_17 HA1_17 1.0000 . ? 
CB_17 SG_17 1.782(9) . ? 
CB_17 HB1_17 0.9900 . ? 
CB_17 HB2_17 0.9900 . ? 
CB_17 SG1_17 2.03(3) . ? 
CB_17 HB3_17 0.9900 . ? 
CB_17 HB4_17 0.9900 . ? 
CB_17 SG1_17 1.53(5) . ? 
CB_17 HB3_17 0.9900 . ? 
CB_17 HB4_17 0.9900 . ? 
SG_17 SG_37 2.016(3) . ? 
N_18 CA_18 1.457(4) . ? 
N_18 H0_18 0.8800 . ? 
CA_18 CB_18 1.525(5) . ? 
CA_18 C_18 1.533(4) . ? 
CA_18 HA_18 1.0000 . ? 
CB_18 OG_18 1.432(4) . ? 
CB_18 HB1_18 0.9900 . ? 
CB_18 HB2_18 0.9900 . ? 
OG_18 HG_18 0.8400 . ? 
C_18 O_18 1.231(4) . ? 
C_18 N_19 1.346(4) . ? 
N_19 CA_19 1.454(4) . ? 
N_19 H0_19 0.8800 . ? 
CA_19 C_19 1.517(5) . ? 
CA_19 CB_19 1.543(4) . ? 
CA_19 HA_19 1.0000 . ? 
CB_19 CG1_19 1.520(5) . ? 
CB_19 CG2_19 1.529(5) . ? 
CB_19 HB_19 1.0000 . ? 
CG1_19 HG1A_19 0.9800 . ? 
CG1_19 HG1B_19 0.9800 . ? 
CG1_19 HG1C_19 0.9800 . ? 
CG2_19 HG2A_19 0.9800 . ? 
CG2_19 HG2B_19 0.9800 . ? 
CG2_19 HG2C_19 0.9800 . ? 
C_19 O_19 1.236(4) . ? 
C_19 N_20 1.342(4) . ? 
N_20 CA_20 1.458(4) . ? 
N_20 H0_20 0.8800 . ? 
CA_20 C_20 1.520(4) . ? 
CA_20 HA1_20 0.9900 . ? 
CA_20 HA2_20 0.9900 . ? 
C_20 O_20 1.232(4) . ? 
C_20 N_21 1.343(4) . ? 
N_21 CA_21 1.453(4) . ? 
N_21 H0_21 0.8800 . ? 
CA_21 C_21 1.519(4) . ? 
CA_21 CB_21 1.551(4) . ? 
CA_21 HA_21 1.0000 . ? 
CB_21 CG_21 1.491(5) . ? 
CB_21 HB1_21 0.9900 . ? 
CB_21 HB2_21 0.9900 . ? 
CG_21 CD2_21 1.392(5) . ? 
CG_21 CD1_21 1.395(5) . ? 
CD1_21 CE1_21 1.384(5) . ? 
CD1_21 HD1_21 0.9500 . ? 
CD2_21 CE2_21 1.381(5) . ? 
CD2_21 HD2_21 0.9500 . ? 
CE1_21 CZ_21 1.387(6) . ? 
CE1_21 HE1_21 0.9500 . ? 
CE2_21 CZ_21 1.369(6) . ? 
CE2_21 HE2_21 0.9500 . ? 
CZ_21 HZ_21 0.9500 . ? 
C_21 O_21 1.244(4) . ? 
C_21 N_22 1.326(4) . ? 
N_22 CA_22 1.456(4) . ? 
N_22 H0_22 0.8800 . ? 
CA_22 CB_22 1.542(4) . ? 
CA_22 C_22 1.545(4) . ? 
CA_22 HA_22 1.0000 . ? 
CB_22 OG_22 1.404(4) . ? 
CB_22 HB1_22 0.9900 . ? 
CB_22 HB2_22 0.9900 . ? 
OG_22 HG_22 0.8400 . ? 
C_22 O_22 1.241(4) . ? 
C_22 N_23 1.334(4) . ? 
N_23 CA_23 1.460(4) . ? 
N_23 H0_23 0.8800 . ? 
CA_23 C_23 1.533(4) . ? 
CA_23 CB_23 1.551(4) . ? 
CA_23 HA_23 1.0000 . ? 
CB_23 CG2_23 1.519(5) . ? 
CB_23 CG1_23 1.533(5) . ? 
CB_23 HB_23 1.0000 . ? 
CG1_23 HG1A_23 0.9800 . ? 
CG1_23 HG1B_23 0.9800 . ? 
CG1_23 HG1C_23 0.9800 . ? 
CG2_23 HG2A_23 0.9800 . ? 
CG2_23 HG2B_23 0.9800 . ? 
CG2_23 HG2C_23 0.9800 . ? 
C_23 O_23 1.228(4) . ? 
C_23 N_24 1.348(4) . ? 
N_24 CA_24 1.448(4) . ? 
N_24 H0_24 0.8800 . ? 
CA_24 CB_24 1.538(6) . ? 
CA_24 C_24 1.541(5) . ? 
CA_24 HA_24 1.0000 . ? 
CB_24 OG1_24 1.422(6) . ? 
CB_24 CG2_24 1.511(6) . ? 
CB_24 HB_24 1.0000 . ? 
OG1_24 HG1_24 0.8400 . ? 
CG2_24 HG2A_24 0.9800 . ? 
CG2_24 HG2B_24 0.9800 . ? 
CG2_24 HG2C_24 0.9800 . ? 
C_24 O_24 1.215(5) . ? 
C_24 N_25 1.309(13) . ? 
C_24 N_25 1.346(7) . ? 
N_25 CA_25 1.469(7) . ? 
N_25 H0_25 0.8800 . ? 
N_25 CA_25 1.451(15) . ? 
N_25 H0A_25 0.8800 . ? 
CA_25 CB_25 1.492(10) . ? 
CA_25 C_25 1.534(9) . ? 
CA_25 HA_25 1.0000 . ? 
CA_25 CB_25 1.524(16) . ? 
CA_25 C_25 1.530(15) . ? 
CA_25 HA1_25 1.0000 . ? 
CB_25 CG_25 1.576(7) . ? 
CB_25 HB1_25 0.9900 . ? 
CB_25 HB2_25 0.9900 . ? 
CB_25 CG_25 1.524(18) . ? 
CB_25 HB3_25 0.9900 . ? 
CB_25 HB4_25 0.9900 . ? 
CG_25 CD_25 1.507(7) . ? 
CG_25 HG1_25 0.9900 . ? 
CG_25 HG2_25 0.9900 . ? 
CG_25 CD_25 1.502(19) . ? 
CG_25 HG3_25 0.9900 . ? 
CG_25 HG4_25 0.9900 . ? 
CD_25 NE_25 1.453(7) . ? 
CD_25 HD1_25 0.9900 . ? 
CD_25 HD2_25 0.9900 . ? 
CD_25 NE_25 1.426(18) . ? 
CD_25 HD3_25 0.9900 . ? 
CD_25 HD4_25 0.9900 . ? 
NE_25 CZ_25 1.315(6) . ? 
NE_25 HE_25 0.8800 . ? 
NE_25 CZ_25 1.303(17) . ? 
NE_25 HE1_25 0.8800 . ? 
CZ_25 NH2_25 1.321(7) . ? 
CZ_25 NH1_25 1.342(7) . ? 
CZ_25 NH1_25 1.317(18) . ? 
CZ_25 NH2_25 1.339(18) . ? 
NH1_25 HH1A_25 0.8800 . ? 
NH1_25 HH1B_25 0.8800 . ? 
NH1_25 HH1C_25 0.8800 . ? 
NH1_25 HH1D_25 0.8800 . ? 
NH2_25 HH2A_25 0.8800 . ? 
NH2_25 HH2B_25 0.8800 . ? 
NH2_25 HH2C_25 0.8800 . ? 
NH2_25 HH2D_25 0.8800 . ? 
C_25 O_25 1.232(8) . ? 
C_25 N_26 1.311(8) . ? 
C_25 O_25 1.241(16) . ? 
C_25 N_26 1.310(14) . ? 
N_26 CA_26 1.457(6) . ? 
N_26 H0_26 0.8800 . ? 
CA_26 C_26 1.505(8) . ? 
CA_26 HA1_26 0.9900 . ? 
CA_26 HA2_26 0.9900 . ? 
C_26 O_26 1.234(6) . ? 
C_26 N_27 1.326(7) . ? 
N_27 CA_27 1.450(7) . ? 
N_27 H0_27 0.8800 . ? 
CA_27 C_27 1.529(7) . ? 
CA_27 CB_27 1.534(8) . ? 
CA_27 HA_27 1.0000 . ? 
CB_27 HB1_27 0.9800 . ? 
CB_27 HB2_27 0.9800 . ? 
CB_27 HB3_27 0.9800 . ? 
C_27 O_27 1.227(6) . ? 
C_27 N_28 1.319(6) . ? 
N_28 CA_28 1.451(5) . ? 
N_28 H0_28 0.8800 . ? 
CA_28 CB_28 1.539(6) . ? 
CA_28 C_28 1.540(5) . ? 
CA_28 HA_28 1.0000 . ? 
CB_28 OG1_28 1.425(5) . ? 
CB_28 CG2_28 1.494(7) . ? 
CB_28 HB_28 1.0000 . ? 
OG1_28 HG1_28 0.8400 . ? 
CG2_28 HG2A_28 0.9800 . ? 
CG2_28 HG2B_28 0.9800 . ? 
CG2_28 HG2C_28 0.9800 . ? 
C_28 O_28 1.224(5) . ? 
C_28 N_29 1.316(5) . ? 
N_29 CA_29 1.468(4) . ? 
N_29 H0_29 0.8800 . ? 
CA_29 C_29 1.525(5) . ? 
CA_29 CB_29 1.538(5) . ? 
CA_29 HA_29 1.0000 . ? 
CB_29 CG_29 1.528(5) . ? 
CB_29 HB1_29 0.9900 . ? 
CB_29 HB2_29 0.9900 . ? 
CG_29 CD_29 1.510(6) . ? 
CG_29 HG1_29 0.9900 . ? 
CG_29 HG2_29 0.9900 . ? 
CD_29 CE_29 1.522(6) . ? 
CD_29 HD1_29 0.9900 . ? 
CD_29 HD2_29 0.9900 . ? 
CE_29 NZ_29 1.493(7) . ? 
CE_29 HE1_29 0.9900 . ? 
CE_29 HE2_29 0.9900 . ? 
NZ_29 HZ1_29 0.9100 . ? 
NZ_29 HZ2_29 0.9100 . ? 
NZ_29 HZ3_29 0.9100 . ? 
C_29 O_29 1.231(4) . ? 
C_29 N_30 1.337(4) . ? 
N_30 CA_30 1.446(4) . ? 
N_30 H0_30 0.8800 . ? 
CA_30 C_30 1.516(4) . ? 
CA_30 HA1_30 0.9900 . ? 
CA_30 HA2_30 0.9900 . ? 
C_30 O_30 1.222(4) . ? 
C_30 N_31 1.348(4) . ? 
N_31 CA_31 1.459(4) . ? 
N_31 H0_31 0.8800 . ? 
CA_31 C_31 1.518(4) . ? 
CA_31 CB_31 1.544(4) . ? 
CA_31 HA_31 1.0000 . ? 
CB_31 CG_31 1.516(5) . ? 
CB_31 HB1_31 0.9900 . ? 
CB_31 HB2_31 0.9900 . ? 
CG_31 CD2_31 1.380(5) . ? 
CG_31 CD1_31 1.398(5) . ? 
CD1_31 CE1_31 1.377(5) . ? 
CD1_31 HD1_31 0.9500 . ? 
CD2_31 CE2_31 1.401(5) . ? 
CD2_31 HD2_31 0.9500 . ? 
CE1_31 CZ_31 1.390(6) . ? 
CE1_31 HE1_31 0.9500 . ? 
CE2_31 CZ_31 1.384(6) . ? 
CE2_31 HE2_31 0.9500 . ? 
CZ_31 HZ_31 0.9500 . ? 
C_31 O_31 1.237(4) . ? 
C_31 N_32 1.336(4) . ? 
N_32 CA_32 1.456(4) . ? 
N_32 H0_32 0.8800 . ? 
CA_32 C_32 1.528(4) . ? 
CA_32 CB_32 1.544(5) . ? 
CA_32 HA_32 1.0000 . ? 
CB_32 CG2_32 1.508(5) . ? 
CB_32 CG1_32 1.521(4) . ? 
CB_32 HB_32 1.0000 . ? 
CG1_32 HG1A_32 0.9800 . ? 
CG1_32 HG1B_32 0.9800 . ? 
CG1_32 HG1C_32 0.9800 . ? 
CG2_32 HG2A_32 0.9800 . ? 
CG2_32 HG2B_32 0.9800 . ? 
CG2_32 HG2C_32 0.9800 . ? 
C_32 O_32 1.241(4) . ? 
C_32 N_33 1.329(4) . ? 
N_33 CA_33 1.451(4) . ? 
N_33 H0_33 0.8800 . ? 
CA_33 C_33 1.539(4) . ? 
CA_33 CB_33 1.541(5) . ? 
CA_33 HA_33 1.0000 . ? 
CB_33 OG1_33 1.441(4) . ? 
CB_33 CG2_33 1.508(5) . ? 
CB_33 HB_33 1.0000 . ? 
OG1_33 HG1_33 0.841(19) . ? 
CG2_33 HG2A_33 0.9800 . ? 
CG2_33 HG2B_33 0.9800 . ? 
CG2_33 HG2C_33 0.9800 . ? 
C_33 O_33 1.230(4) . ? 
C_33 N_34 1.350(4) . ? 
N_34 CA_34 1.460(4) . ? 
N_34 H0_34 0.8800 . ? 
CA_34 C_34 1.532(5) . ? 
CA_34 CB_34 1.533(5) . ? 
CA_34 HA_34 1.0000 . ? 
CB_34 HB1_34 0.9800 . ? 
CB_34 HB2_34 0.9800 . ? 
CB_34 HB3_34 0.9800 . ? 
C_34 O_34 1.236(5) . ? 
C_34 N_35 1.340(4) . ? 
N_35 CA_35 1.456(4) . ? 
N_35 H0_35 0.8800 . ? 
CA_35 C_35 1.518(5) . ? 
CA_35 HA1_35 0.9900 . ? 
CA_35 HA2_35 0.9900 . ? 
C_35 O_35 1.233(5) . ? 
C_35 N_36 1.335(5) . ? 
N_36 CA_36 1.446(5) . ? 
N_36 H0_36 0.8800 . ? 
CA_36 CB_36 1.522(6) . ? 
CA_36 C_36 1.530(5) . ? 
CA_36 HA_36 1.0000 . ? 
CB_36 CG_36 1.497(5) . ? 
CB_36 HB1_36 0.9900 . ? 
CB_36 HB2_36 0.9900 . ? 
CG_36 CD2_36 1.358(5) . ? 
CG_36 ND1_36 1.378(5) . ? 
CD2_36 NE2_36 1.374(6) . ? 
CD2_36 HD2_36 1.01(5) . ? 
ND1_36 CE1_36 1.323(6) . ? 
ND1_36 HD1_36 0.88(5) . ? 
CE1_36 NE2_36 1.320(6) . ? 
CE1_36 HE1_36 0.86(5) . ? 
NE2_36 HE2_36 0.97(5) . ? 
C_36 O_36 1.238(5) . ? 
C_36 N_37 1.329(5) . ? 
N_37 CA_37 1.449(17) . ? 
N_37 CA_37 1.454(18) . ? 
N_37 CA_37 1.456(7) . ? 
N_37 H0_37 0.8800 . ? 
C_37 O_37 1.236(5) . ? 
C_37 N_38 1.329(5) . ? 
C_37 CA_37 1.524(16) . ? 
C_37 CA_37 1.525(17) . ? 
C_37 CA_37 1.529(8) . ? 
CA_37 CB_37 1.547(8) . ? 
CA_37 HA_37 1.0000 . ? 
CA_37 CB_37 1.547(18) . ? 
CA_37 HA1_37 1.0000 . ? 
CA_37 CB_37 1.538(19) . ? 
CA_37 HA1_37 1.0000 . ? 
CB_37 SG_37 1.800(9) . ? 
CB_37 HB1_37 0.9900 . ? 
CB_37 HB2_37 0.9900 . ? 
CB_37 SG1_37 1.82(3) . ? 
CB_37 HB3_37 0.9900 . ? 
CB_37 HB4_37 0.9900 . ? 
CB_37 SG1_37 2.13(14) . ? 
CB_37 HB3_37 0.9900 . ? 
CB_37 HB4_37 0.9900 . ? 
N_38 CA_38 1.450(17) . ? 
N_38 CA_38 1.451(9) . ? 
N_38 H0_38 0.8800 . ? 
CA_38 C_38 1.496(10) . ? 
CA_38 HA1_38 0.9900 . ? 
CA_38 HA2_38 0.9900 . ? 
CA_38 C_38 1.507(17) . ? 
CA_38 HA3_38 0.9900 . ? 
CA_38 HA4_38 0.9900 . ? 
C_38 O_38 1.225(8) . ? 
C_38 N_39 1.334(9) . ? 
C_38 O_38 1.229(15) . ? 
C_38 N_39 1.325(16) . ? 
N_39 CA_39 1.428(10) . ? 
N_39 H0_39 0.8800 . ? 
N_39 CA_39 1.50(2) . ? 
N_39 H0A_39 0.8800 . ? 
CA_39 C_39 1.507(8) . ? 
CA_39 CB_39 1.563(8) . ? 
CA_39 HA_39 1.0000 . ? 
CB_39 OG1_39 1.415(9) . ? 
CB_39 CG2_39 1.519(12) . ? 
CB_39 HB_39 1.0000 . ? 
OG1_39 HG1_39 0.8400 . ? 
CG2_39 HG2A_39 0.9800 . ? 
CG2_39 HG2B_39 0.9800 . ? 
CG2_39 HG2C_39 0.9800 . ? 
C_39 O_39 1.235(6) . ? 
C_39 N_40 1.351(7) . ? 
N_40 CA_40 1.446(8) . ? 
N_40 H0_40 0.8800 . ? 
CA_40 C_40 1.506(8) . ? 
CA_40 CB_40 1.548(8) . ? 
CA_40 HA_40 1.0000 . ? 
CB_40 CG1_40 1.523(12) . ? 
CB_40 CG2_40 1.523(11) . ? 
CB_40 HB_40 1.0000 . ? 
CG1_40 HG1A_40 0.9800 . ? 
CG1_40 HG1B_40 0.9800 . ? 
CG1_40 HG1C_40 0.9800 . ? 
CG2_40 HG2A_40 0.9800 . ? 
CG2_40 HG2B_40 0.9800 . ? 
CG2_40 HG2C_40 0.9800 . ? 
C_40 O_40 1.255(6) . ? 
C_40 N_41 1.313(7) . ? 
N_41 CA_41 1.441(8) . ? 
N_41 H0_41 0.8800 . ? 
CA_41 C_41 1.515(8) . ? 
CA_41 CB_41 1.534(9) . ? 
CA_41 HA_41 1.0000 . ? 
CB_41 CG_41 1.517(14) . ? 
CB_41 HB1_41 0.9900 . ? 
CB_41 HB2_41 0.9900 . ? 
CG_41 ND2_41 1.222(16) . ? 
CG_41 OD1_41 1.278(14) . ? 
ND2_41 HD2A_41 0.8800 . ? 
ND2_41 HD2B_41 0.8800 . ? 
C_41 O_41 1.250(7) . ? 
C_41 N_42 1.338(7) . ? 
N_42 CA_42 1.450(6) . ? 
N_42 H0_42 0.8800 . ? 
CA_42 C_42 1.518(7) . ? 
CA_42 CB_42 1.530(8) . ? 
CA_42 HA_42 1.0000 . ? 
CB_42 HB1_42 0.9800 . ? 
CB_42 HB2_42 0.9800 . ? 
CB_42 HB3_42 0.9800 . ? 
C_42 O_42 1.226(5) . ? 
C_42 N_43 1.340(6) . ? 
N_43 CA_43 1.441(6) . ? 
N_43 H0_43 0.8800 . ? 
CA_43 CB_43 1.526(7) . ? 
CA_43 C_43 1.543(6) . ? 
CA_43 HA_43 1.0000 . ? 
CB_43 OG1_43 1.414(7) . ? 
CB_43 CG2_43 1.514(9) . ? 
CB_43 HB_43 1.0000 . ? 
OG1_43 HG1_43 0.8400 . ? 
CG2_43 HG2A_43 0.9800 . ? 
CG2_43 HG2B_43 0.9800 . ? 
CG2_43 HG2C_43 0.9800 . ? 
C_43 O_43 1.230(5) . ? 
C_43 N_44 1.323(5) . ? 
N_44 CA_44 1.454(5) . ? 
N_44 H0_44 0.8800 . ? 
CA_44 C_44 1.530(6) . ? 
CA_44 CB_44 1.539(5) . ? 
CA_44 HA_44 1.0000 . ? 
CB_44 HB1_44 0.9800 . ? 
CB_44 HB2_44 0.9800 . ? 
CB_44 HB3_44 0.9800 . ? 
C_44 O_44 1.235(5) . ? 
C_44 N_45 1.341(5) . ? 
N_45 CA_45 1.456(5) . ? 
N_45 H0_45 0.8800 . ? 
CA_45 C_45 1.518(7) . ? 
CA_45 CB_45 1.541(6) . ? 
CA_45 HA_45 1.0000 . ? 
CB_45 CG_45 1.504(8) . ? 
CB_45 HB1_45 0.9900 . ? 
CB_45 HB2_45 0.9900 . ? 
CG_45 CD_45 1.528(7) . ? 
CG_45 HG1_45 0.9900 . ? 
CG_45 HG2_45 0.9900 . ? 
CD_45 NE_45 1.446(9) . ? 
CD_45 HD1_45 0.9900 . ? 
CD_45 HD2_45 0.9900 . ? 
NE_45 CZ_45 1.306(10) . ? 
NE_45 HE_45 0.8800 . ? 
CZ_45 NH1_45 1.294(9) . ? 
CZ_45 NH2_45 1.306(9) . ? 
NH1_45 HH1A_45 0.8800 . ? 
NH1_45 HH1B_45 0.8800 . ? 
NH2_45 HH2A_45 0.8800 . ? 
NH2_45 HH2B_45 0.8800 . ? 
C_45 O_45 1.228(5) . ? 
C_45 N_46 1.338(6) . ? 
N_46 CA_46 1.451(7) . ? 
N_46 CA_46 1.454(16) . ? 
N_46 H0_46 0.8800 . ? 
CA_46 C_46 1.508(8) . ? 
CA_46 CB_46 1.562(8) . ? 
CA_46 HA_46 1.0000 . ? 
CA_46 C_46 1.520(17) . ? 
CA_46 CB_46 1.545(16) . ? 
CA_46 HA1_46 1.0000 . ? 
CB_46 CG1_46 1.521(7) . ? 
CB_46 CG2_46 1.535(6) . ? 
CB_46 HB_46 1.0000 . ? 
CG2_46 HG2A_46 0.9800 . ? 
CG2_46 HG2B_46 0.9800 . ? 
CG2_46 HG2C_46 0.9800 . ? 
CG1_46 CD1_46 1.513(7) . ? 
CG1_46 HG1A_46 0.9900 . ? 
CG1_46 HG1B_46 0.9900 . ? 
CD1_46 HD1A_46 0.9800 . ? 
CD1_46 HD1B_46 0.9800 . ? 
CD1_46 HD1C_46 0.9800 . ? 
C_46 O_46 1.270(8) . ? 
C_46 N_47 1.309(8) . ? 
C_46 O_46 1.219(17) . ? 
C_46 N_47 1.319(17) . ? 
N_47 CA_47 1.463(10) . ? 
N_47 H0_47 0.8800 . ? 
N_47 CA_47 1.453(18) . ? 
N_47 H0A_47 0.8800 . ? 
CA_47 C_47 1.521(14) . ? 
CA_47 HA1_47 0.9900 . ? 
CA_47 HA2_47 0.9900 . ? 
CA_47 C_47 1.512(18) . ? 
CA_47 HA3_47 0.9900 . ? 
CA_47 HA4_47 0.9900 . ? 
C_47 O_47 1.232(13) . ? 
C_47 N_48 1.325(15) . ? 
C_47 O_47 1.247(18) . ? 
C_47 N_48 1.328(18) . ? 
N_48 CA_48 1.441(13) . ? 
N_48 H0_48 0.8800 . ? 
N_48 CA_48 1.441(19) . ? 
N_48 H0A_48 0.8800 . ? 
CA_48 C_48 1.527(13) . ? 
CA_48 HA1_48 0.9900 . ? 
CA_48 HA2_48 0.9900 . ? 
CA_48 C_48 1.514(18) . ? 
CA_48 HA3_48 0.9900 . ? 
CA_48 HA4_48 0.9900 . ? 
C_48 O_48 1.250(12) . ? 
C_48 N_49 1.321(11) . ? 
C_48 O_48 1.245(18) . ? 
C_48 N_49 1.327(18) . ? 
N_49 CA_49 1.451(9) . ? 
N_49 H0_49 0.8800 . ? 
N_49 CA_49 1.461(17) . ? 
N_49 H0A_49 0.8800 . ? 
CA_49 CB_49 1.515(10) . ? 
CA_49 C_49 1.523(7) . ? 
C_49 O_49 1.241(6) . ? 
C_49 N_50 1.326(7) . ? 
N_50 CA_50 1.469(7) . ? 
N_50 H0_50 0.8800 . ? 
CA_50 CB_50 1.512(8) . ? 
CA_50 C_50 1.523(7) . ? 
CA_50 HA_50 1.0000 . ? 
CB_50 CG2_50 1.509(9) . ? 
CB_50 CG1_50 1.538(9) . ? 
CB_50 HB_50 1.0000 . ? 
CG1_50 HG1A_50 0.9800 . ? 
CG1_50 HG1B_50 0.9800 . ? 
CG1_50 HG1C_50 0.9800 . ? 
CG2_50 HG2A_50 0.9800 . ? 
CG2_50 HG2B_50 0.9800 . ? 
CG2_50 HG2C_50 0.9800 . ? 
C_50 O_50 1.232(6) . ? 
C_50 N_51 1.320(6) . ? 
N_51 CA_51 1.454(5) . ? 
N_51 H0_51 0.8800 . ? 
CA_51 C_51 1.521(6) . ? 
CA_51 CB_51 1.540(6) . ? 
CA_51 HA_51 1.0000 . ? 
CB_51 CG1_51 1.522(6) . ? 
CB_51 CG2_51 1.539(6) . ? 
CB_51 HB_51 1.0000 . ? 
CG1_51 HG1A_51 0.9800 . ? 
CG1_51 HG1B_51 0.9800 . ? 
CG1_51 HG1C_51 0.9800 . ? 
CG2_51 HG2A_51 0.9800 . ? 
CG2_51 HG2B_51 0.9800 . ? 
CG2_51 HG2C_51 0.9800 . ? 
C_51 O_51 1.239(5) . ? 
C_51 N_52 1.331(5) . ? 
N_52 CA_52 1.457(5) . ? 
N_52 H0_52 0.8800 . ? 
CA_52 C_52 1.517(6) . ? 
CA_52 HA1_52 0.9900 . ? 
CA_52 HA2_52 0.9900 . ? 
C_52 O_52 1.229(5) . ? 
C_52 N_53 1.335(5) . ? 
N_53 CA_53 1.467(5) . ? 
N_53 H0_53 0.8800 . ? 
CA_53 C_53 1.504(6) . ? 
CA_53 CB_53 1.545(6) . ? 
CA_53 HA_53 1.0000 . ? 
CB_53 OG1_53 1.388(7) . ? 
CB_53 CG2_53 1.510(9) . ? 
CB_53 HB_53 1.0000 . ? 
OG1_53 HG1_53 0.8400 . ? 
CG2_53 HG2A_53 0.9800 . ? 
CG2_53 HG2B_53 0.9800 . ? 
CG2_53 HG2C_53 0.9800 . ? 
C_53 O_53 1.232(5) . ? 
C_53 N_54 1.330(5) . ? 
N_54 CA_54 1.449(5) . ? 
N_54 H0_54 0.8800 . ? 
CA_54 CB_54 1.530(6) . ? 
CA_54 C_54 1.532(5) . ? 
CA_54 HA_54 1.0000 . ? 
CB_54 CG_54 1.510(6) . ? 
CB_54 HB1_54 0.9900 . ? 
CB_54 HB2_54 0.9900 . ? 
CG_54 CD2_54 1.395(6) . ? 
CG_54 CD1_54 1.398(5) . ? 
CD1_54 CE1_54 1.389(6) . ? 
CD1_54 HD1_54 0.9500 . ? 
CD2_54 CE2_54 1.374(6) . ? 
CD2_54 HD2_54 0.9500 . ? 
CE1_54 CZ_54 1.387(6) . ? 
CE1_54 HE1_54 0.9500 . ? 
CE2_54 CZ_54 1.383(6) . ? 
CE2_54 HE2_54 0.9500 . ? 
CZ_54 HZ_54 0.9500 . ? 
C_54 O_54 1.233(5) . ? 
C_54 N_55 1.313(5) . ? 
N_55 CA_55 1.466(5) . ? 
N_55 H0_55 0.8800 . ? 
CA_55 C_55 1.501(6) . ? 
CA_55 CB_55 1.517(7) . ? 
CA_55 HA_55 1.0000 . ? 
CB_55 HB1_55 0.9800 . ? 
CB_55 HB2_55 0.9800 . ? 
CB_55 HB3_55 0.9800 . ? 
C_55 O_55 1.248(5) . ? 
C_55 N_56 1.323(5) . ? 
N_56 CA_56 1.451(5) . ? 
N_56 H0_56 0.8800 . ? 
CA_56 C_56 1.509(6) . ? 
CA_56 CB_56 1.525(6) . ? 
CA_56 HA_56 1.0000 . ? 
CB_56 HB1_56 0.9800 . ? 
CB_56 HB2_56 0.9800 . ? 
CB_56 HB3_56 0.9800 . ? 
C_56 O_56 1.246(5) . ? 
C_56 N_57 1.319(5) . ? 
N_57 CA_57 1.447(12) . ? 
N_57 CA_57 1.457(14) . ? 
N_57 H0_57 0.8800 . ? 
C_57 O_57 1.237(5) . ? 
C_57 N_58 1.317(6) . ? 
C_57 CA_57 1.509(14) . ? 
C_57 CA_57 1.520(12) . ? 
CA_57 CB_57 1.559(13) . ? 
CA_57 HA_57 1.0000 . ? 
CA_57 CB_57 1.552(15) . ? 
CA_57 HA1_57 1.0000 . ? 
CB_57 CG_57 1.557(11) . ? 
CB_57 HB1_57 0.9900 . ? 
CB_57 HB2_57 0.9900 . ? 
CB_57 CG_57 1.525(15) . ? 
CB_57 HB3_57 0.9900 . ? 
CB_57 HB4_57 0.9900 . ? 
CG_57 CD_57 1.415(14) . ? 
CG_57 HG1_57 0.9900 . ? 
CG_57 HG2_57 0.9900 . ? 
CG_57 CD_57 1.500(14) . ? 
CG_57 HG3_57 0.9900 . ? 
CG_57 HG4_57 0.9900 . ? 
CD_57 NE_57 1.468(10) . ? 
CD_57 HD1_57 0.9900 . ? 
CD_57 HD2_57 0.9900 . ? 
CD_57 NE_57 1.446(12) . ? 
CD_57 HD3_57 0.9900 . ? 
CD_57 HD4_57 0.9900 . ? 
NE_57 CZ_57 1.274(11) . ? 
NE_57 HE_57 0.8800 . ? 
NE_57 CZ_57 1.315(12) . ? 
NE_57 HE1_57 0.8800 . ? 
CZ_57 NH1_57 1.312(11) . ? 
CZ_57 NH2_57 1.313(10) . ? 
CZ_57 NH1_57 1.321(13) . ? 
CZ_57 NH2_57 1.360(12) . ? 
NH1_57 HH1A_57 0.8800 . ? 
NH1_57 HH1B_57 0.8800 . ? 
NH1_57 HH1C_57 0.8800 . ? 
NH1_57 HH1D_57 0.8800 . ? 
NH2_57 HH2A_57 0.8800 . ? 
NH2_57 HH2B_57 0.8800 . ? 
NH2_57 HH2C_57 0.8800 . ? 
NH2_57 HH2D_57 0.8800 . ? 
N_58 CA_58 1.483(5) . ? 
N_58 H0_58 0.8800 . ? 
CA_58 CB_58 1.519(8) . ? 
CA_58 C_58 1.525(6) . ? 
CA_58 HA_58 1.0000 . ? 
CB_58 CG2_58 1.501(8) . ? 
CB_58 CG1_58 1.543(7) . ? 
CB_58 HB_58 1.0000 . ? 
CG1_58 HG1A_58 0.9800 . ? 
CG1_58 HG1B_58 0.9800 . ? 
CG1_58 HG1C_58 0.9800 . ? 
CG2_58 HG2A_58 0.9800 . ? 
CG2_58 HG2B_58 0.9800 . ? 
CG2_58 HG2C_58 0.9800 . ? 
C_58 O_58 1.232(5) . ? 
C_58 N_59 1.339(5) . ? 
N_59 CA_59 1.457(6) . ? 
N_59 H0_59 0.8800 . ? 
CA_59 C_59 1.539(5) . ? 
CA_59 CB_59 1.543(6) . ? 
CA_59 HA_59 1.0000 . ? 
CB_59 CG_59 1.487(7) . ? 
CB_59 HB1_59 0.9900 . ? 
CB_59 HB2_59 0.9900 . ? 
CG_59 CD2_59 1.395(6) . ? 
CG_59 CD1_59 1.405(6) . ? 
CD1_59 CE1_59 1.373(8) . ? 
CD1_59 HD1_59 0.9500 . ? 
CD2_59 CE2_59 1.381(6) . ? 
CD2_59 HD2_59 0.9500 . ? 
CE1_59 CZ_59 1.373(8) . ? 
CE1_59 HE1_59 0.9500 . ? 
CE2_59 CZ_59 1.398(7) . ? 
CE2_59 HE2_59 0.9500 . ? 
CZ_59 HZ_59 0.9500 . ? 
C_59 O_59 1.230(5) . ? 
C_59 N_60 1.323(6) . ? 
N_60 CA_60 1.464(6) . ? 
N_60 CD_60 1.476(5) . ? 
CD_60 CG_60 1.512(7) . ? 
CD_60 HD1_60 0.9900 . ? 
CD_60 HD2_60 0.9900 . ? 
CA_60 C_60 1.531(6) . ? 
CA_60 CB_60 1.538(6) . ? 
CA_60 HA_60 1.0000 . ? 
CB_60 CG_60 1.518(7) . ? 
CB_60 HB1_60 0.9900 . ? 
CB_60 HB2_60 0.9900 . ? 
CG_60 HG1_60 0.9900 . ? 
CG_60 HG2_60 0.9900 . ? 
C_60 O_60 1.244(5) . ? 
C_60 N_61 1.325(6) . ? 
N_61 CA_61 1.444(6) . ? 
N_61 H0_61 0.8800 . ? 
CA_61 C_61 1.532(5) . ? 
CA_61 HA1_61 0.9900 . ? 
CA_61 HA2_61 0.9900 . ? 
C_61 O_61 1.228(5) . ? 
C_61 N_62 1.338(5) . ? 
N_62 CA_62 1.452(4) . ? 
N_62 H0_62 0.8800 . ? 
CA_62 C_62 1.527(5) . ? 
CA_62 CB_62 1.537(6) . ? 
CA_62 HA_62 1.0000 . ? 
CB_62 CG_62 1.523(6) . ? 
CB_62 HB1_62 0.9900 . ? 
CB_62 HB2_62 0.9900 . ? 
CG_62 OD1_62 1.230(6) . ? 
CG_62 ND2_62 1.298(7) . ? 
ND2_62 HD2A_62 0.8800 . ? 
ND2_62 HD2B_62 0.8800 . ? 
C_62 O_62 1.231(4) . ? 
C_62 N_63 1.347(4) . ? 
N_63 CA_63 1.472(4) . ? 
N_63 H0_63 0.8800 . ? 
CA_63 CB_63 1.535(5) . ? 
CA_63 C_63 1.549(4) . ? 
CA_63 HA_63 1.0000 . ? 
CB_63 CG_63 1.522(5) . ? 
CB_63 HB1_63 0.9900 . ? 
CB_63 HB2_63 0.9900 . ? 
CG_63 OD1_63 1.256(4) . ? 
CG_63 OD2_63 1.256(4) . ? 
C_63 O_63 1.220(4) . ? 
C_63 N_64 1.341(5) . ? 
N_64 CA_64 1.462(4) . ? 
N_64 H0_64 0.8800 . ? 
CA_64 C_64 1.505(5) . ? 
CA_64 CB_64 1.538(5) . ? 
CA_64 HA_64 1.0000 . ? 
CB_64 CG_64 1.526(5) . ? 
CB_64 HB1_64 0.9900 . ? 
CB_64 HB2_64 0.9900 . ? 
CG_64 CD_64 1.509(6) . ? 
CG_64 HG1_64 0.9900 . ? 
CG_64 HG2_64 0.9900 . ? 
CD_64 NE_64 1.450(6) . ? 
CD_64 HD1_64 0.9900 . ? 
CD_64 HD2_64 0.9900 . ? 
NE_64 CZ_64 1.335(6) . ? 
NE_64 HE_64 0.8800 . ? 
CZ_64 NH2_64 1.312(6) . ? 
CZ_64 NH1_64 1.342(5) . ? 
NH1_64 HH1A_64 0.8800 . ? 
NH1_64 HH1B_64 0.8800 . ? 
NH2_64 HH2A_64 0.8800 . ? 
NH2_64 HH2B_64 0.8800 . ? 
C_64 O_64 1.234(4) . ? 
C_64 N_65 1.335(4) . ? 
N_65 CA_65 1.451(5) . ? 
N_65 H0_65 0.8800 . ? 
CA_65 CB_65 1.525(5) . ? 
CA_65 C_65 1.534(4) . ? 
CA_65 HA_65 1.0000 . ? 
CB_65 HB1_65 0.9800 . ? 
CB_65 HB2_65 0.9800 . ? 
CB_65 HB3_65 0.9800 . ? 
C_65 O_65 1.239(4) . ? 
C_65 N_66 1.328(4) . ? 
N_66 CA_66 1.454(4) . ? 
N_66 H0_66 0.8800 . ? 
CA_66 C_66 1.523(5) . ? 
CA_66 CB_66 1.540(5) . ? 
CA_66 HA_66 1.0000 . ? 
CB_66 CG_66 1.502(5) . ? 
CB_66 HB1_66 0.9900 . ? 
CB_66 HB2_66 0.9900 . ? 
CG_66 CD1_66 1.375(5) . ? 
CG_66 CD2_66 1.445(5) . ? 
CD2_66 CE3_66 1.388(6) . ? 
CD2_66 CE2_66 1.436(5) . ? 
CE2_66 NE1_66 1.364(5) . ? 
CE2_66 CZ2_66 1.385(6) . ? 
CE3_66 CZ3_66 1.379(6) . ? 
CE3_66 HE3_66 0.9500 . ? 
CD1_66 NE1_66 1.362(5) . ? 
CD1_66 HD1_66 0.9500 . ? 
NE1_66 HE1_66 0.8800 . ? 
CZ2_66 CH2_66 1.400(7) . ? 
CZ2_66 HZ2_66 0.9500 . ? 
CZ3_66 CH2_66 1.395(7) . ? 
CZ3_66 HZ3_66 0.9500 . ? 
CH2_66 HH2_66 0.9500 . ? 
C_66 O_66 1.228(4) . ? 
C_66 N_67 1.334(4) . ? 
N_67 CA_67 1.456(5) . ? 
N_67 H0_67 0.8800 . ? 
CA_67 C_67 1.509(5) . ? 
CA_67 CB_67 1.553(5) . ? 
CA_67 HA_67 1.0000 . ? 
CB_67 CG2_67 1.518(6) . ? 
CB_67 CG1_67 1.524(6) . ? 
CB_67 HB_67 1.0000 . ? 
CG1_67 HG1A_67 0.9800 . ? 
CG1_67 HG1B_67 0.9800 . ? 
CG1_67 HG1C_67 0.9800 . ? 
CG2_67 HG2A_67 0.9800 . ? 
CG2_67 HG2B_67 0.9800 . ? 
CG2_67 HG2C_67 0.9800 . ? 
C_67 O_67 1.234(4) . ? 
C_67 N_68 1.338(4) . ? 
N_68 CA_68 1.434(6) . ? 
N_68 CA_68 1.459(18) . ? 
N_68 H0_68 0.8800 . ? 
C_68 O_68 1.245(4) . ? 
C_68 N_69 1.320(5) . ? 
C_68 CA_68 1.516(17) . ? 
C_68 CA_68 1.529(6) . ? 
CA_68 CB_68 1.530(18) . ? 
CA_68 HA_68 1.0000 . ? 
CA_68 CB_68 1.524(6) . ? 
CA_68 HA1_68 1.0000 . ? 
CB_68 OG_68 1.405(19) . ? 
CB_68 HB1_68 0.9900 . ? 
CB_68 HB2_68 0.9900 . ? 
CB_68 OG_68 1.405(6) . ? 
CB_68 HB3_68 0.9900 . ? 
CB_68 HB4_68 0.9900 . ? 
N_69 CA_69 1.457(5) . ? 
N_69 H0_69 0.8800 . ? 
CA_69 C_69 1.504(6) . ? 
CA_69 CB_69 1.552(5) . ? 
CA_69 HA_69 1.0000 . ? 
CB_69 CG_69 1.506(6) . ? 
CB_69 HB1_69 0.9900 . ? 
CB_69 HB2_69 0.9900 . ? 
CG_69 CD1_69 1.524(6) . ? 
CG_69 CD2_69 1.526(6) . ? 
CG_69 HG_69 1.0000 . ? 
CD1_69 HD1A_69 0.9800 . ? 
CD1_69 HD1B_69 0.9800 . ? 
CD1_69 HD1C_69 0.9800 . ? 
CD2_69 HD2A_69 0.9800 . ? 
CD2_69 HD2B_69 0.9800 . ? 
CD2_69 HD2C_69 0.9800 . ? 
C_69 O_69 1.228(5) . ? 
C_69 N_70 1.340(6) . ? 
N_70 CA_70 1.443(6) . ? 
N_70 H0_70 0.8800 . ? 
CA_70 C_70 1.512(8) . ? 
CA_70 CB_70 1.519(8) . ? 
CA_70 HA_70 1.0000 . ? 
CB_70 OG1_70 1.441(6) . ? 
CB_70 CG2_70 1.510(10) . ? 
CB_70 HB_70 1.0000 . ? 
OG1_70 HG1_70 0.8400 . ? 
CG2_70 HG2A_70 0.9800 . ? 
CG2_70 HG2B_70 0.9800 . ? 
CG2_70 HG2C_70 0.9800 . ? 
C_70 O_70 1.249(6) . ? 
C_70 N_71 1.341(7) . ? 
N_71 CA_71 1.456(18) . ? 
N_71 CA_71 1.464(10) . ? 
N_71 H0_71 0.8800 . ? 
C_71 O_71 1.225(7) . ? 
C_71 N_72 1.341(10) . ? 
C_71 CA_71 1.488(11) . ? 
C_71 CA_71 1.507(17) . ? 
CA_71 CB_71 1.537(18) . ? 
CA_71 HA_71 1.0000 . ? 
CA_71 CB_71 1.540(11) . ? 
CA_71 HA1_71 1.0000 . ? 
CB_71 OG_71 1.41(2) . ? 
CB_71 HB1_71 0.9900 . ? 
CB_71 HB2_71 0.9900 . ? 
CB_71 OG_71 1.428(18) . ? 
CB_71 HB3_71 0.9900 . ? 
CB_71 HB4_71 0.9900 . ? 
N_72 CA_72 1.468(10) . ? 
N_72 H0_72 0.8800 . ? 
CA_72 CB_72 1.499(15) . ? 
CA_72 C_72 1.505(9) . ? 
CA_72 HA_72 1.0000 . ? 
CB_72 HB1_72 0.9800 . ? 
CB_72 HB2_72 0.9800 . ? 
CB_72 HB3_72 0.9800 . ? 
C_72 O_72 1.221(7) . ? 
C_72 N_73 1.327(7) . ? 
N_73 CA_73 1.453(6) . ? 
N_73 H0_73 0.8800 . ? 
CA_73 C_73 1.526(6) . ? 
CA_73 CB_73 1.536(6) . ? 
CA_73 HA_73 1.0000 . ? 
CB_73 CG_73 1.536(6) . ? 
CB_73 HB1_73 0.9900 . ? 
CB_73 HB2_73 0.9900 . ? 
CG_73 CD_73 1.491(7) . ? 
CG_73 HG1_73 0.9900 . ? 
CG_73 HG2_73 0.9900 . ? 
CD_73 OE1_73 1.246(5) . ? 
CD_73 NE2_73 1.313(6) . ? 
NE2_73 HE2A_73 0.8800 . ? 
NE2_73 HE2B_73 0.8800 . ? 
C_73 O_73 1.230(5) . ? 
C_73 N_74 1.334(5) . ? 
N_74 CA_74 1.458(5) . ? 
N_74 H0_74 0.8800 . ? 
CA_74 C_74 1.525(6) . ? 
CA_74 CB_74 1.549(5) . ? 
CA_74 HA_74 1.0000 . ? 
CB_74 OG1_74 1.410(6) . ? 
CB_74 CG2_74 1.506(8) . ? 
CB_74 HB_74 1.0000 . ? 
OG1_74 HG1_74 0.8400 . ? 
CG2_74 HG2A_74 0.9800 . ? 
CG2_74 HG2B_74 0.9800 . ? 
CG2_74 HG2C_74 0.9800 . ? 
C_74 O_74 1.225(4) . ? 
C_74 N_75 1.330(5) . ? 
N_75 CA_75 1.453(5) . ? 
N_75 H0_75 0.8800 . ? 
CA_75 CB_75 1.527(5) . ? 
CA_75 C_75 1.530(5) . ? 
CA_75 HA_75 1.0000 . ? 
CB_75 CG_75 1.522(5) . ? 
CB_75 HB1_75 0.9900 . ? 
CB_75 HB2_75 0.9900 . ? 
CG_75 CD2_75 1.508(7) . ? 
CG_75 CD1_75 1.535(6) . ? 
CG_75 HG_75 1.0000 . ? 
CD1_75 HD1A_75 0.9800 . ? 
CD1_75 HD1B_75 0.9800 . ? 
CD1_75 HD1C_75 0.9800 . ? 
CD2_75 HD2A_75 0.9800 . ? 
CD2_75 HD2B_75 0.9800 . ? 
CD2_75 HD2C_75 0.9800 . ? 
C_75 O_75 1.222(4) . ? 
C_75 N_76 1.328(5) . ? 
N_76 CA_76 1.449(5) . ? 
N_76 H0_76 0.8800 . ? 
CA_76 C_76 1.515(5) . ? 
CA_76 CB_76 1.568(5) . ? 
CA_76 HA_76 1.0000 . ? 
CB_76 CG_76 1.527(6) . ? 
CB_76 HB1_76 0.9900 . ? 
CB_76 HB2_76 0.9900 . ? 
CG_76 CD2_76 1.512(6) . ? 
CG_76 CD1_76 1.518(6) . ? 
CG_76 HG_76 1.0000 . ? 
CD1_76 HD1A_76 0.9800 . ? 
CD1_76 HD1B_76 0.9800 . ? 
CD1_76 HD1C_76 0.9800 . ? 
CD2_76 HD2A_76 0.9800 . ? 
CD2_76 HD2B_76 0.9800 . ? 
CD2_76 HD2C_76 0.9800 . ? 
C_76 O_76 1.239(4) . ? 
C_76 N_77 1.350(5) . ? 
N_77 CA_77 1.479(5) . ? 
N_77 CD_77 1.484(5) . ? 
CD_77 CG_77 1.516(6) . ? 
CD_77 HD1_77 0.9900 . ? 
CD_77 HD2_77 0.9900 . ? 
CA_77 C_77 1.526(5) . ? 
CA_77 CB_77 1.529(5) . ? 
CA_77 HA_77 1.0000 . ? 
CB_77 CG_77 1.536(6) . ? 
CB_77 HB1_77 0.9900 . ? 
CB_77 HB2_77 0.9900 . ? 
CG_77 HG1_77 0.9900 . ? 
CG_77 HG2_77 0.9900 . ? 
C_77 O_77 1.236(4) . ? 
C_77 N_78 1.333(4) . ? 
N_78 CA_78 1.443(9) . ? 
N_78 CA_78 1.473(11) . ? 
N_78 H0_78 0.8800 . ? 
C_78 O_78 1.250(4) . ? 
C_78 N_79 1.321(4) . ? 
C_78 CA_78 1.508(9) . ? 
C_78 CA_78 1.542(11) . ? 
CA_78 CB_78 1.547(9) . ? 
CA_78 HA_78 1.0000 . ? 
CA_78 CB_78 1.522(11) . ? 
CA_78 HA1_78 1.0000 . ? 
CB_78 CG_78 1.324(11) . ? 
CB_78 HB1_78 0.9900 . ? 
CB_78 HB2_78 0.9900 . ? 
CB_78 CG_78 1.424(11) . ? 
CB_78 HB3_78 0.9900 . ? 
CB_78 HB4_78 0.9900 . ? 
CG_78 CD_78 1.555(10) . ? 
CG_78 HG1_78 0.9900 . ? 
CG_78 HG2_78 0.9900 . ? 
CG_78 CD_78 1.502(10) . ? 
CG_78 HG3_78 0.9900 . ? 
CG_78 HG4_78 0.9900 . ? 
CD_78 NE_78 1.471(12) . ? 
CD_78 HD1_78 0.9900 . ? 
CD_78 HD2_78 0.9900 . ? 
CD_78 NE_78 1.483(11) . ? 
CD_78 HD3_78 0.9900 . ? 
CD_78 HD4_78 0.9900 . ? 
NE_78 CZ_78 1.314(11) . ? 
NE_78 HE_78 0.8800 . ? 
NE_78 CZ_78 1.333(11) . ? 
NE_78 HE1_78 0.8800 . ? 
CZ_78 NH1_78 1.337(11) . ? 
CZ_78 NH2_78 1.361(12) . ? 
CZ_78 NH2_78 1.313(12) . ? 
CZ_78 NH1_78 1.324(12) . ? 
NH1_78 HH1A_78 0.8800 . ? 
NH1_78 HH1B_78 0.8800 . ? 
NH1_78 HH1C_78 0.8800 . ? 
NH1_78 HH1D_78 0.8800 . ? 
NH2_78 HH2A_78 0.8800 . ? 
NH2_78 HH2B_78 0.8800 . ? 
NH2_78 HH2C_78 0.8800 . ? 
NH2_78 HH2D_78 0.8800 . ? 
N_79 CA_79 1.462(4) . ? 
N_79 H0_79 0.8800 . ? 
CA_79 C_79 1.534(4) . ? 
CA_79 CB_79 1.542(5) . ? 
CA_79 HA_79 1.0000 . ? 
CB_79 CG1_79 1.520(5) . ? 
CB_79 CG2_79 1.530(4) . ? 
CB_79 HB_79 1.0000 . ? 
CG1_79 HG1A_79 0.9800 . ? 
CG1_79 HG1B_79 0.9800 . ? 
CG1_79 HG1C_79 0.9800 . ? 
CG2_79 HG2A_79 0.9800 . ? 
CG2_79 HG2B_79 0.9800 . ? 
CG2_79 HG2C_79 0.9800 . ? 
C_79 O_79 1.239(4) . ? 
C_79 N_80 1.320(4) . ? 
N_80 CA_80 1.462(4) . ? 
N_80 H0_80 0.8800 . ? 
CA_80 C_80 1.513(5) . ? 
CA_80 CB_80 1.525(5) . ? 
CA_80 HA_80 1.0000 . ? 
CB_80 HB1_80 0.9800 . ? 
CB_80 HB2_80 0.9800 . ? 
CB_80 HB3_80 0.9800 . ? 
C_80 O_80 1.235(4) . ? 
C_80 N_81 1.348(4) . ? 
N_81 CA_81 1.457(5) . ? 
N_81 H0_81 0.8800 . ? 
CA_81 CB_81 1.518(6) . ? 
CA_81 C_81 1.532(5) . ? 
CA_81 HA_81 1.0000 . ? 
CB_81 CG_81 1.511(6) . ? 
CB_81 HB1_81 0.9900 . ? 
CB_81 HB2_81 0.9900 . ? 
CG_81 OD1_81 1.202(7) . ? 
CG_81 ND2_81 1.364(9) . ? 
ND2_81 HD2A_81 0.8800 . ? 
ND2_81 HD2B_81 0.8800 . ? 
C_81 O_81 1.246(4) . ? 
C_81 N_82 1.316(5) . ? 
N_82 CA_82 1.450(5) . ? 
N_82 H0_82 0.8800 . ? 
CA_82 C_82 1.516(6) . ? 
CA_82 HA1_82 0.9900 . ? 
CA_82 HA2_82 0.9900 . ? 
C_82 O_82 1.240(5) . ? 
C_82 N_83 1.332(5) . ? 
N_83 CA_83 1.449(14) . ? 
N_83 CA_83 1.455(10) . ? 
N_83 H0_83 0.8800 . ? 
C_83 O_83 1.231(6) . ? 
C_83 N_84 1.345(7) . ? 
C_83 CA_83 1.503(11) . ? 
C_83 CA_83 1.525(15) . ? 
CA_83 CB_83 1.546(11) . ? 
CA_83 HA_83 1.0000 . ? 
CA_83 CB_83 1.533(15) . ? 
CA_83 HA1_83 1.0000 . ? 
CB_83 OG_83 1.425(12) . ? 
CB_83 HB1_83 0.9900 . ? 
CB_83 HB2_83 0.9900 . ? 
CB_83 OG_83 1.411(18) . ? 
CB_83 HB3_83 0.9900 . ? 
CB_83 HB4_83 0.9900 . ? 
N_84 CA_84 1.433(14) . ? 
N_84 CA_84 1.471(9) . ? 
N_84 H0_84 0.8800 . ? 
C_84 O_84 1.240(5) . ? 
C_84 N_85 1.327(5) . ? 
C_84 CA_84 1.518(8) . ? 
C_84 CA_84 1.538(13) . ? 
CA_84 CB_84 1.535(12) . ? 
CA_84 HA_84 1.0000 . ? 
CA_84 CB_84 1.538(15) . ? 
CA_84 HA1_84 1.0000 . ? 
CB_84 OG_84 1.476(9) . ? 
CB_84 HB1_84 0.9900 . ? 
CB_84 HB2_84 0.9900 . ? 
CB_84 OG_84 1.353(13) . ? 
CB_84 HB3_84 0.9900 . ? 
CB_84 HB4_84 0.9900 . ? 
N_85 CA_85 1.447(5) . ? 
N_85 H0_85 0.8800 . ? 
CA_85 C_85 1.498(6) . ? 
CA_85 CB_85 1.566(6) . ? 
CA_85 HA_85 1.0000 . ? 
CB_85 CG_85 1.490(6) . ? 
CB_85 HB1_85 0.9900 . ? 
CB_85 HB2_85 0.9900 . ? 
CG_85 CD1_85 1.386(6) . ? 
CG_85 CD2_85 1.387(6) . ? 
CD1_85 CE1_85 1.386(6) . ? 
CD1_85 HD1_85 0.9500 . ? 
CD2_85 CE2_85 1.369(7) . ? 
CD2_85 HD2_85 0.9500 . ? 
CE1_85 CZ_85 1.372(6) . ? 
CE1_85 HE1_85 0.9500 . ? 
CE2_85 CZ_85 1.389(7) . ? 
CE2_85 HE2_85 0.9500 . ? 
CZ_85 HZ_85 0.9500 . ? 
C_85 O_85 1.240(5) . ? 
C_85 N_86 1.327(5) . ? 
N_86 CA_86 1.462(5) . ? 
N_86 H0_86 0.8800 . ? 
CA_86 CB_86 1.527(6) . ? 
CA_86 C_86 1.528(5) . ? 
CA_86 HA_86 1.0000 . ? 
CB_86 CG1_86 1.521(6) . ? 
CB_86 CG2_86 1.543(7) . ? 
CB_86 HB_86 1.0000 . ? 
CG1_86 HG1A_86 0.9800 . ? 
CG1_86 HG1B_86 0.9800 . ? 
CG1_86 HG1C_86 0.9800 . ? 
CG2_86 HG2A_86 0.9800 . ? 
CG2_86 HG2B_86 0.9800 . ? 
CG2_86 HG2C_86 0.9800 . ? 
C_86 O_86 1.229(4) . ? 
C_86 N_87 1.337(4) . ? 
N_87 CA_87 1.452(4) . ? 
N_87 H0_87 0.8800 . ? 
CA_87 C_87 1.533(4) . ? 
CA_87 CB_87 1.533(5) . ? 
CA_87 HA_87 1.0000 . ? 
CB_87 OG1_87 1.434(4) . ? 
CB_87 CG2_87 1.505(6) . ? 
CB_87 HB_87 1.0000 . ? 
OG1_87 HG1_87 0.8400 . ? 
CG2_87 HG2A_87 0.9800 . ? 
CG2_87 HG2B_87 0.9800 . ? 
CG2_87 HG2C_87 0.9800 . ? 
C_87 O_87 1.235(4) . ? 
C_87 N_88 1.330(4) . ? 
N_88 CA_88 1.466(4) . ? 
N_88 H0_88 0.8800 . ? 
CA_88 CB_88 1.533(5) . ? 
CA_88 C_88 1.537(5) . ? 
CA_88 HA_88 1.0000 . ? 
CB_88 CG2_88 1.527(5) . ? 
CB_88 CG1_88 1.529(5) . ? 
CB_88 HB_88 1.0000 . ? 
CG1_88 HG1A_88 0.9800 . ? 
CG1_88 HG1B_88 0.9800 . ? 
CG1_88 HG1C_88 0.9800 . ? 
CG2_88 HG2A_88 0.9800 . ? 
CG2_88 HG2B_88 0.9800 . ? 
CG2_88 HG2C_88 0.9800 . ? 
C_88 O_88 1.225(4) . ? 
C_88 N_89 1.329(5) . ? 
N_89 CA_89 1.440(14) . ? 
N_89 CA_89 1.463(10) . ? 
N_89 H0_89 0.8800 . ? 
CA_89 C_89 1.515(10) . ? 
CA_89 CB_89 1.552(11) . ? 
CA_89 HA_89 1.0000 . ? 
CA_89 C_89 1.512(14) . ? 
CA_89 CB_89 1.538(16) . ? 
CA_89 HA1_89 1.0000 . ? 
CB_89 CG_89 1.520(10) . ? 
CB_89 HB1_89 0.9900 . ? 
CB_89 HB2_89 0.9900 . ? 
CB_89 CG_89 1.502(18) . ? 
CB_89 HB3_89 0.9900 . ? 
CB_89 HB4_89 0.9900 . ? 
CG_89 CD_89 1.535(9) . ? 
CG_89 HG1_89 0.9900 . ? 
CG_89 HG2_89 0.9900 . ? 
CG_89 CD_89 1.529(18) . ? 
CG_89 HG3_89 0.9900 . ? 
CG_89 HG4_89 0.9900 . ? 
CD_89 NE_89 1.473(8) . ? 
CD_89 HD1_89 0.9900 . ? 
CD_89 HD2_89 0.9900 . ? 
CD_89 NE_89 1.475(19) . ? 
CD_89 HD3_89 0.9900 . ? 
CD_89 HD4_89 0.9900 . ? 
NE_89 CZ_89 1.312(9) . ? 
NE_89 HE_89 0.8800 . ? 
NE_89 CZ_89 1.338(17) . ? 
NE_89 HE1_89 0.8800 . ? 
CZ_89 NH2_89 1.301(10) . ? 
CZ_89 NH1_89 1.334(9) . ? 
CZ_89 NH1_89 1.292(16) . ? 
CZ_89 NH2_89 1.323(17) . ? 
NH1_89 HH1A_89 0.8800 . ? 
NH1_89 HH1B_89 0.8800 . ? 
NH1_89 HH1C_89 0.8800 . ? 
NH1_89 HH1D_89 0.8800 . ? 
NH2_89 HH2A_89 0.8800 . ? 
NH2_89 HH2B_89 0.8800 . ? 
NH2_89 HH2C_89 0.8800 . ? 
NH2_89 HH2D_89 0.8800 . ? 
C_89 O_89 1.237(5) . ? 
C_89 N_90 1.326(5) . ? 
N_90 CA_90 1.452(5) . ? 
N_90 H0_90 0.8800 . ? 
CA_90 C_90 1.512(5) . ? 
CA_90 HA1_90 0.9900 . ? 
CA_90 HA2_90 0.9900 . ? 
C_90 O_90 1.228(4) . ? 
C_90 N_91 1.332(5) . ? 
N_91 CA_91 1.443(5) . ? 
N_91 H0_91 0.8800 . ? 
CA_91 C_91 1.528(6) . ? 
CA_91 CB_91 1.534(6) . ? 
CA_91 HA_91 1.0000 . ? 
CB_91 OG_91 1.435(7) . ? 
CB_91 HB1_91 0.9900 . ? 
CB_91 HB2_91 0.9900 . ? 
OG_91 HG_91 0.8400 . ? 
C_91 O_91 1.241(4) . ? 
C_91 N_92 1.331(5) . ? 
N_92 CA_92 1.444(5) . ? 
N_92 H0_92 0.8800 . ? 
CA_92 CB_92 1.529(5) . ? 
CA_92 C_92 1.533(6) . ? 
CA_92 HA_92 1.0000 . ? 
CB_92 OG1_92 1.424(5) . ? 
CB_92 CG2_92 1.524(7) . ? 
CB_92 HB_92 1.0000 . ? 
OG1_92 HG1_92 0.8400 . ? 
CG2_92 HG2A_92 0.9800 . ? 
CG2_92 HG2B_92 0.9800 . ? 
CG2_92 HG2C_92 0.9800 . ? 
C_92 O_92 1.238(4) . ? 
C_92 N_93 1.327(5) . ? 
N_93 CA_93 1.450(15) . ? 
N_93 CA_93 1.465(9) . ? 
N_93 H0_93 0.8800 . ? 
CA_93 C_93 1.531(9) . ? 
CA_93 CB_93 1.538(8) . ? 
CA_93 HA_93 1.0000 . ? 
CA_93 C_93 1.492(15) . ? 
CA_93 CB_93 1.536(16) . ? 
CA_93 HA1_93 1.0000 . ? 
CB_93 CG_93 1.512(8) . ? 
CB_93 HB1_93 0.9900 . ? 
CB_93 HB2_93 0.9900 . ? 
CB_93 CG_93 1.489(16) . ? 
CB_93 HB3_93 0.9900 . ? 
CB_93 HB4_93 0.9900 . ? 
CG_93 CD_93 1.514(8) . ? 
CG_93 HG1_93 0.9900 . ? 
CG_93 HG2_93 0.9900 . ? 
CG_93 CD_93 1.468(16) . ? 
CG_93 HG3_93 0.9900 . ? 
CG_93 HG4_93 0.9900 . ? 
CD_93 OE1_93 1.238(8) . ? 
CD_93 OE2_93 1.260(8) . ? 
CD_93 OE1_93 1.242(16) . ? 
CD_93 OE2_93 1.249(16) . ? 
C_93 O_93 1.240(5) . ? 
C_93 N_94 1.313(5) . ? 
N_94 CA_94 1.449(6) . ? 
N_94 H0_94 0.8800 . ? 
CA_94 CB_94 1.518(6) . ? 
CA_94 C_94 1.534(6) . ? 
CA_94 HA_94 1.0000 . ? 
CB_94 HB1_94 0.9800 . ? 
CB_94 HB2_94 0.9800 . ? 
CB_94 HB3_94 0.9800 . ? 
C_94 O_94 1.232(5) . ? 
C_94 N_95 1.322(6) . ? 
N_95 CA_95 1.457(6) . ? 
N_95 H0_95 0.8800 . ? 
CA_95 C_95 1.511(8) . ? 
CA_95 CB_95 1.539(7) . ? 
CA_95 HA_95 1.0000 . ? 
CB_95 HB1_95 0.9800 . ? 
CB_95 HB2_95 0.9800 . ? 
CB_95 HB3_95 0.9800 . ? 
C_95 O_95 1.236(6) . ? 
C_95 N_96 1.348(6) . ? 
N_96 CA_96 1.439(7) . ? 
N_96 H0_96 0.8800 . ? 
CA_96 C_96 1.515(8) . ? 
CA_96 CB_96 1.539(8) . ? 
CA_96 HA_96 1.0000 . ? 
CB_96 CG1_96 1.505(10) . ? 
CB_96 CG2_96 1.530(10) . ? 
CB_96 HB_96 1.0000 . ? 
CG1_96 HG1A_96 0.9800 . ? 
CG1_96 HG1B_96 0.9800 . ? 
CG1_96 HG1C_96 0.9800 . ? 
CG2_96 HG2A_96 0.9800 . ? 
CG2_96 HG2B_96 0.9800 . ? 
CG2_96 HG2C_96 0.9800 . ? 
C_96 O_96 1.230(6) . ? 
C_96 N_97 1.334(7) . ? 
N_97 CA_97 1.457(8) . ? 
N_97 H0_97 0.8800 . ? 
CA_97 C_97 1.488(10) . ? 
CA_97 HA1_97 0.9900 . ? 
CA_97 HA2_97 0.9900 . ? 
C_97 O_97 1.252(7) . ? 
C_97 N_98 1.324(8) . ? 
N_98 CA_98 1.445(8) . ? 
N_98 H0_98 0.8800 . ? 
CA_98 C_98 1.520(7) . ? 
CA_98 CB_98 1.523(8) . ? 
CA_98 HA_98 1.0000 . ? 
CB_98 HB1_98 0.9800 . ? 
CB_98 HB2_98 0.9800 . ? 
CB_98 HB3_98 0.9800 . ? 
C_98 O_98 1.224(6) . ? 
C_98 N_99 1.318(6) . ? 
N_99 CA_99 1.466(6) . ? 
N_99 H0_99 0.8800 . ? 
CA_99 CB_99 1.505(8) . ? 
CA_99 C_99 1.534(7) . ? 
CA_99 HA_99 1.0000 . ? 
CB_99 HB1_99 0.9800 . ? 
CB_99 HB2_99 0.9800 . ? 
CB_99 HB3_99 0.9800 . ? 
C_99 O_99 1.229(6) . ? 
C_99 N_100 1.317(6) . ? 
N_100 CA_100 1.449(5) . ? 
N_100 H0_100 0.8800 . ? 
CA_100 C_100 1.523(6) . ? 
CA_100 CB_100 1.549(6) . ? 
CA_100 HA_100 1.0000 . ? 
CB_100 CG2_100 1.524(7) . ? 
CB_100 CG1_100 1.533(7) . ? 
CB_100 HB_100 1.0000 . ? 
CG1_100 HG1A_100 0.9800 . ? 
CG1_100 HG1B_100 0.9800 . ? 
CG1_100 HG1C_100 0.9800 . ? 
CG2_100 HG2A_100 0.9800 . ? 
CG2_100 HG2B_100 0.9800 . ? 
CG2_100 HG2C_100 0.9800 . ? 
C_100 O_100 1.245(5) . ? 
C_100 N_101 1.327(5) . ? 
N_101 CA_101 1.435(5) . ? 
N_101 H0_101 0.8800 . ? 
CA_101 CB_101 1.527(6) . ? 
CA_101 C_101 1.529(5) . ? 
CA_101 HA_101 1.0000 . ? 
C_101 O_101 1.235(4) . ? 
C_101 N_102 1.329(4) . ? 
CB_101 SG_101 1.825(4) . ? 
CB_101 HB1_101 0.9900 . ? 
CB_101 HB2_101 0.9900 . ? 
SG_101 SG_111 2.075(3) . ? 
N_102 CA_102 1.459(4) . ? 
N_102 H0_102 0.8800 . ? 
CA_102 C_102 1.521(4) . ? 
CA_102 CB_102 1.530(5) . ? 
CA_102 HA_102 1.0000 . ? 
CB_102 CG_102 1.542(5) . ? 
CB_102 HB1_102 0.9900 . ? 
CB_102 HB2_102 0.9900 . ? 
CG_102 CD_102 1.523(5) . ? 
CG_102 HG1_102 0.9900 . ? 
CG_102 HG2_102 0.9900 . ? 
CD_102 NE_102 1.460(5) . ? 
CD_102 HD1_102 0.9900 . ? 
CD_102 HD2_102 0.9900 . ? 
NE_102 CZ_102 1.337(5) . ? 
NE_102 HE_102 0.8800 . ? 
CZ_102 NH1_102 1.313(5) . ? 
CZ_102 NH2_102 1.319(5) . ? 
NH1_102 HH1A_102 0.8800 . ? 
NH1_102 HH1B_102 0.8800 . ? 
NH2_102 HH2A_102 0.8800 . ? 
NH2_102 HH2B_102 0.8800 . ? 
C_102 O_102 1.219(4) . ? 
C_102 N_103 1.346(4) . ? 
N_103 CA_103 1.455(4) . ? 
N_103 H0_103 0.8800 . ? 
CA_103 C_103 1.518(4) . ? 
CA_103 CB_103 1.539(4) . ? 
CA_103 HA_103 1.0000 . ? 
CB_103 OG_103 1.414(4) . ? 
CB_103 HB1_103 0.9900 . ? 
CB_103 HB2_103 0.9900 . ? 
OG_103 HG_103 0.8400 . ? 
C_103 O_103 1.238(4) . ? 
C_103 N_104 1.337(4) . ? 
N_104 CA_104 1.443(4) . ? 
N_104 H0_104 0.8800 . ? 
CA_104 C_104 1.514(4) . ? 
CA_104 HA1_104 0.9900 . ? 
CA_104 HA2_104 0.9900 . ? 
C_104 O_104 1.232(4) . ? 
C_104 N_105 1.336(5) . ? 
N_105 CA_105 1.452(16) . ? 
N_105 CA_105 1.471(8) . ? 
N_105 H0_105 0.8800 . ? 
CA_105 C_105 1.522(8) . ? 
CA_105 CB_105 1.526(9) . ? 
CA_105 HA_105 1.0000 . ? 
CA_105 C_105 1.514(16) . ? 
CA_105 CB_105 1.539(17) . ? 
CA_105 HA1_105 1.0000 . ? 
CB_105 CG_105 1.549(8) . ? 
CB_105 HB1_105 0.9900 . ? 
CB_105 HB2_105 0.9900 . ? 
CB_105 CG_105 1.495(16) . ? 
CB_105 HB3_105 0.9900 . ? 
CB_105 HB4_105 0.9900 . ? 
CG_105 CD_105 1.525(7) . ? 
CG_105 HG1_105 0.9900 . ? 
CG_105 HG2_105 0.9900 . ? 
CG_105 CD_105 1.506(16) . ? 
CG_105 HG3_105 0.9900 . ? 
CG_105 HG4_105 0.9900 . ? 
CD_105 NE_105 1.442(7) . ? 
CD_105 HD1_105 0.9900 . ? 
CD_105 HD2_105 0.9900 . ? 
CD_105 NE_105 1.467(16) . ? 
CD_105 HD3_105 0.9900 . ? 
CD_105 HD4_105 0.9900 . ? 
NE_105 CZ_105 1.323(8) . ? 
NE_105 HE_105 0.8800 . ? 
NE_105 CZ_105 1.327(16) . ? 
NE_105 HE1_105 0.8800 . ? 
CZ_105 NH1_105 1.323(9) . ? 
CZ_105 NH2_105 1.345(10) . ? 
CZ_105 NH1_105 1.323(16) . ? 
CZ_105 NH2_105 1.327(16) . ? 
NH1_105 HH1A_105 0.8800 . ? 
NH1_105 HH1B_105 0.8800 . ? 
NH1_105 HH1C_105 0.8800 . ? 
NH1_105 HH1D_105 0.8800 . ? 
NH2_105 HH2A_105 0.8800 . ? 
NH2_105 HH2B_105 0.8800 . ? 
NH2_105 HH2C_105 0.8800 . ? 
NH2_105 HH2D_105 0.8800 . ? 
C_105 O_105 1.235(4) . ? 
C_105 N_106 1.325(5) . ? 
N_106 CA_106 1.468(5) . ? 
N_106 H0_106 0.8800 . ? 
CA_106 C_106 1.510(6) . ? 
CA_106 CB_106 1.542(6) . ? 
CA_106 HA_106 1.0000 . ? 
CB_106 OG1_106 1.417(6) . ? 
CB_106 CG2_106 1.523(6) . ? 
CB_106 HB_106 1.0000 . ? 
OG1_106 HG1_106 0.8400 . ? 
CG2_106 HG2A_106 0.9800 . ? 
CG2_106 HG2B_106 0.9800 . ? 
CG2_106 HG2C_106 0.9800 . ? 
C_106 O_106 1.229(5) . ? 
C_106 N_107 1.332(5) . ? 
N_107 CA_107 1.455(5) . ? 
N_107 H0_107 0.8800 . ? 
CA_107 C_107 1.515(6) . ? 
CA_107 CB_107 1.524(6) . ? 
CA_107 HA_107 1.0000 . ? 
CB_107 OG1_107 1.424(5) . ? 
CB_107 CG2_107 1.532(6) . ? 
CB_107 HB_107 1.0000 . ? 
OG1_107 HG1_107 0.8400 . ? 
CG2_107 HG2A_107 0.9800 . ? 
CG2_107 HG2B_107 0.9800 . ? 
CG2_107 HG2C_107 0.9800 . ? 
C_107 O_107 1.241(5) . ? 
C_107 N_108 1.318(6) . ? 
N_108 CA_108 1.443(5) . ? 
N_108 H0_108 0.8800 . ? 
CA_108 C_108 1.521(6) . ? 
CA_108 HA1_108 0.9900 . ? 
CA_108 HA2_108 0.9900 . ? 
C_108 O_108 1.241(4) . ? 
C_108 N_109 1.320(5) . ? 
N_109 CA_109 1.466(5) . ? 
N_109 H0_109 0.8800 . ? 
CA_109 C_109 1.524(6) . ? 
CA_109 CB_109 1.530(5) . ? 
CA_109 HA_109 1.0000 . ? 
CB_109 CG_109 1.504(6) . ? 
CB_109 HB1_109 0.9900 . ? 
CB_109 HB2_109 0.9900 . ? 
CG_109 CD1_109 1.364(7) . ? 
CG_109 CD2_109 1.379(6) . ? 
CD1_109 CE1_109 1.374(8) . ? 
CD1_109 HD1_109 0.9500 . ? 
CE1_109 CZ_109 1.384(10) . ? 
CE1_109 HE1_109 0.9500 . ? 
CD2_109 CE2_109 1.393(7) . ? 
CD2_109 HD2_109 0.9500 . ? 
CE2_109 CZ_109 1.374(10) . ? 
CE2_109 HE2_109 0.9500 . ? 
CZ_109 OH_109 1.370(7) . ? 
OH_109 HH_109 0.8400 . ? 
C_109 O_109 1.238(5) . ? 
C_109 N_110 1.317(5) . ? 
N_110 CA_110 1.450(5) . ? 
N_110 H0_110 0.8800 . ? 
CA_110 CB_110 1.523(6) . ? 
CA_110 C_110 1.531(6) . ? 
CA_110 HA_110 1.0000 . ? 
CB_110 CG_110 1.516(7) . ? 
CB_110 HB1_110 0.9900 . ? 
CB_110 HB2_110 0.9900 . ? 
CG_110 CD_110 1.487(7) . ? 
CG_110 HG1_110 0.9900 . ? 
CG_110 HG2_110 0.9900 . ? 
CD_110 OE1_110 1.252(8) . ? 
CD_110 NE2_110 1.309(9) . ? 
NE2_110 HE2A_110 0.8800 . ? 
NE2_110 HE2B_110 0.8800 . ? 
C_110 O_110 1.225(5) . ? 
C_110 N_111 1.316(6) . ? 
N_111 CA_111 1.435(6) . ? 
N_111 H0_111 0.8800 . ? 
CA_111 CB_111 1.516(8) . ? 
CA_111 C_111 1.531(7) . ? 
CA_111 HA_111 1.0000 . ? 
C_111 O_111 1.254(6) . ? 
C_111 N_112 1.321(6) . ? 
CB_111 SG_111 1.827(7) . ? 
CB_111 HB1_111 0.9900 . ? 
CB_111 HB2_111 0.9900 . ? 
N_112 CA_112 1.456(6) . ? 
N_112 H0_112 0.8800 . ? 
CA_112 C_112 1.533(6) . ? 
CA_112 HA1_112 0.9900 . ? 
CA_112 HA2_112 0.9900 . ? 
C_112 O_112 1.239(6) . ? 
C_112 N_113 1.314(6) . ? 
N_113 CA_113 1.454(13) . ? 
N_113 CA_113 1.469(11) . ? 
N_113 H0_113 0.8800 . ? 
C_113 O_113 1.237(6) . ? 
C_113 N_114 1.315(6) . ? 
C_113 CA_113 1.514(12) . ? 
C_113 CA_113 1.522(12) . ? 
CA_113 CB_113 1.547(11) . ? 
CA_113 HA_113 1.0000 . ? 
CA_113 CB_113 1.544(13) . ? 
CA_113 HA1_113 1.0000 . ? 
CB_113 OG1_113 1.440(11) . ? 
CB_113 CG2_113 1.522(12) . ? 
CB_113 HB_113 1.0000 . ? 
CB_113 OG1_113 1.474(12) . ? 
CB_113 CG2_113 1.492(13) . ? 
CB_113 HB1_113 1.0000 . ? 
N_114 CA_114 1.450(6) . ? 
N_114 H0_114 0.8800 . ? 
CA_114 C_114 1.509(7) . ? 
CA_114 CB_114 1.540(7) . ? 
CA_114 HA_114 1.0000 . ? 
CB_114 CG1_114 1.517(8) . ? 
CB_114 CG2_114 1.538(7) . ? 
CB_114 HB_114 1.0000 . ? 
CG2_114 HG2A_114 0.9800 . ? 
CG2_114 HG2B_114 0.9800 . ? 
CG2_114 HG2C_114 0.9800 . ? 
CG1_114 CD1_114 1.520(10) . ? 
CG1_114 HG1A_114 0.9900 . ? 
CG1_114 HG1B_114 0.9900 . ? 
CD1_114 HD1A_114 0.9800 . ? 
CD1_114 HD1B_114 0.9800 . ? 
CD1_114 HD1C_114 0.9800 . ? 
C_114 O_114 1.231(6) . ? 
C_114 N_115 1.337(6) . ? 
N_115 CA_115 1.460(7) . ? 
N_115 H0_115 0.8800 . ? 
CA_115 C_115 1.505(8) . ? 
CA_115 CB_115 1.529(9) . ? 
CA_115 HA_115 1.0000 . ? 
CB_115 OG1_115 1.424(8) . ? 
CB_115 CG2_115 1.502(10) . ? 
CB_115 HB_115 1.0000 . ? 
OG1_115 HG1_115 0.8400 . ? 
CG2_115 HG2A_115 0.9800 . ? 
CG2_115 HG2B_115 0.9800 . ? 
CG2_115 HG2C_115 0.9800 . ? 
C_115 O_115 1.234(6) . ? 
C_115 N_116 1.344(7) . ? 
N_116 CA_116 1.460(6) . ? 
N_116 H0_116 0.8800 . ? 
CA_116 C_116 1.515(7) . ? 
CA_116 CB_116 1.532(8) . ? 
CA_116 HA_116 1.0000 . ? 
CB_116 HB1_116 0.9800 . ? 
CB_116 HB2_116 0.9800 . ? 
CB_116 HB3_116 0.9800 . ? 
C_116 O_116 1.248(5) . ? 
C_116 N_117 1.303(6) . ? 
N_117 CA_117 1.470(6) . ? 
N_117 H0_117 0.8800 . ? 
CA_117 C_117 1.506(6) . ? 
CA_117 CB_117 1.509(7) . ? 
CA_117 HA_117 1.0000 . ? 
CB_117 CG_117 1.529(6) . ? 
CB_117 HB1_117 0.9900 . ? 
CB_117 HB2_117 0.9900 . ? 
CG_117 CD_117 1.509(8) . ? 
CG_117 HG1_117 0.9900 . ? 
CG_117 HG2_117 0.9900 . ? 
CD_117 CE_117 1.529(7) . ? 
CD_117 HD1_117 0.9900 . ? 
CD_117 HD2_117 0.9900 . ? 
CE_117 NZ_117 1.454(8) . ? 
CE_117 HE1_117 0.9900 . ? 
CE_117 HE2_117 0.9900 . ? 
NZ_117 HZ1_117 0.9100 . ? 
NZ_117 HZ2_117 0.9100 . ? 
NZ_117 HZ3_117 0.9100 . ? 
C_117 O_117 1.251(6) . ? 
C_117 N_118 1.314(6) . ? 
N_118 CA_118 1.462(6) . ? 
N_118 H0_118 0.8800 . ? 
CA_118 CB_118 1.514(7) . ? 
CA_118 C_118 1.528(7) . ? 
CA_118 HA_118 1.0000 . ? 
CB_118 CG_118 1.492(10) . ? 
CB_118 HB1_118 0.9900 . ? 
CB_118 HB2_118 0.9900 . ? 
CG_118 OD1_118 1.283(10) . ? 
CG_118 ND2_118 1.297(9) . ? 
ND2_118 HD2A_118 0.8800 . ? 
ND2_118 HD2B_118 0.8800 . ? 
C_118 O_118 1.248(5) . ? 
C_118 N_119 1.319(6) . ? 
N_119 CA_119 1.443(6) . ? 
N_119 H0_119 0.8800 . ? 
CA_119 C_119 1.524(7) . ? 
CA_119 CB_119 1.537(7) . ? 
CA_119 HA_119 1.0000 . ? 
CB_119 CG1_119 1.522(8) . ? 
CB_119 CG2_119 1.529(9) . ? 
CB_119 HB_119 1.0000 . ? 
CG1_119 HG1A_119 0.9800 . ? 
CG1_119 HG1B_119 0.9800 . ? 
CG1_119 HG1C_119 0.9800 . ? 
CG2_119 HG2A_119 0.9800 . ? 
CG2_119 HG2B_119 0.9800 . ? 
CG2_119 HG2C_119 0.9800 . ? 
C_119 O_119 1.209(5) . ? 
C_119 N_120 1.349(5) . ? 
N_120 CA_120 1.453(7) . ? 
N_120 H0_120 0.8800 . ? 
CA_120 C_120 1.524(8) . ? 
CA_120 CB_120 1.526(7) . ? 
CA_120 HA_120 1.0000 . ? 
CB_120 OG1_120 1.413(8) . ? 
CB_120 CG2_120 1.559(9) . ? 
CB_120 HB_120 1.0000 . ? 
OG1_120 HG1_120 0.8400 . ? 
CG2_120 HG2A_120 0.9800 . ? 
CG2_120 HG2B_120 0.9800 . ? 
CG2_120 HG2C_120 0.9800 . ? 
C_120 O_120 1.249(7) . ? 
C_120 N_121 1.345(7) . ? 
N_121 CA_121 1.440(6) . ? 
N_121 H0_121 0.8800 . ? 
CA_121 C_121 1.528(6) . ? 
CA_121 CB_121 1.543(8) . ? 
CA_121 HA_121 1.0000 . ? 
CB_121 HB1_121 0.9800 . ? 
CB_121 HB2_121 0.9800 . ? 
CB_121 HB3_121 0.9800 . ? 
C_121 O_121 1.221(6) . ? 
C_121 N_122 1.330(6) . ? 
N_122 CA_122 1.456(6) . ? 
N_122 H0_122 0.8800 . ? 
CA_122 CB_122 1.518(7) . ? 
CA_122 C_122 1.520(7) . ? 
CA_122 HA_122 1.0000 . ? 
CB_122 CG_122 1.528(11) . ? 
CB_122 HB1_122 0.9900 . ? 
CB_122 HB2_122 0.9900 . ? 
CG_122 OD1_122 1.254(12) . ? 
CG_122 ND2_122 1.269(14) . ? 
ND2_122 HD2A_122 0.8800 . ? 
ND2_122 HD2B_122 0.8800 . ? 
C_122 O_122 1.222(6) . ? 
C_122 N_123 1.322(6) . ? 
N_123 CA_123 1.438(6) . ? 
N_123 H0_123 0.8800 . ? 
CA_123 C_123 1.525(6) . ? 
CA_123 CB_123 1.538(6) . ? 
CA_123 HA_123 1.0000 . ? 
CB_123 CG_123 1.507(6) . ? 
CB_123 HB1_123 0.9900 . ? 
CB_123 HB2_123 0.9900 . ? 
CG_123 CD1_123 1.380(6) . ? 
CG_123 CD2_123 1.405(7) . ? 
CD1_123 CE1_123 1.391(6) . ? 
CD1_123 HD1_123 0.9500 . ? 
CE1_123 CZ_123 1.353(6) . ? 
CE1_123 HE1_123 0.9500 . ? 
CD2_123 CE2_123 1.382(7) . ? 
CD2_123 HD2_123 0.9500 . ? 
CE2_123 CZ_123 1.380(7) . ? 
CE2_123 HE2_123 0.9500 . ? 
CZ_123 OH_123 1.380(5) . ? 
OH_123 HH_123 0.8400 . ? 
C_123 O_123 1.242(5) . ? 
C_123 N_124 1.331(6) . ? 
N_124 CA_124 1.442(6) . ? 
N_124 H0_124 0.8800 . ? 
CA_124 C_124 1.505(8) . ? 
CA_124 CB_124 1.547(7) . ? 
CA_124 HA_124 1.0000 . ? 
CB_124 HB1_124 0.9800 . ? 
CB_124 HB2_124 0.9800 . ? 
CB_124 HB3_124 0.9800 . ? 
C_124 O_124 1.226(5) . ? 
C_124 N_125 1.356(6) . ? 
N_125 CA_125 1.431(6) . ? 
N_125 H0_125 0.8800 . ? 
CA_125 C_125 1.532(6) . ? 
CA_125 CB_125 1.541(6) . ? 
CA_125 HA_125 1.0000 . ? 
CB_125 CG_125 1.543(8) . ? 
CB_125 HB1_125 0.9900 . ? 
CB_125 HB2_125 0.9900 . ? 
CG_125 CD_125 1.488(11) . ? 
CG_125 HG1_125 0.9900 . ? 
CG_125 HG2_125 0.9900 . ? 
CD_125 OE1_125 1.194(9) . ? 
CD_125 OE2_125 1.305(8) . ? 
C_125 O_125 1.241(5) . ? 
C_125 N_126 1.322(6) . ? 
N_126 CA_126 1.433(5) . ? 
N_126 H0_126 0.8800 . ? 
CA_126 C_126 1.514(6) . ? 
CA_126 HA1_126 0.9900 . ? 
CA_126 HA2_126 0.9900 . ? 
C_126 O_126 1.224(5) . ? 
C_126 N_127 1.349(5) . ? 
N_127 CA_127 1.450(5) . ? 
N_127 H0_127 0.8800 . ? 
CA_127 C_127 1.519(6) . ? 
CA_127 CB_127 1.530(6) . ? 
CA_127 HA_127 1.0000 . ? 
CB_127 HB1_127 0.9800 . ? 
CB_127 HB2_127 0.9800 . ? 
CB_127 HB3_127 0.9800 . ? 
C_127 O_127 1.234(5) . ? 
C_127 N_128 1.334(5) . ? 
N_128 CA_128 1.453(5) . ? 
N_128 H0_128 0.8800 . ? 
CA_128 C_128 1.516(6) . ? 
CA_128 CB_128 1.537(5) . ? 
CA_128 HA_128 1.0000 . ? 
CB_128 CG1_128 1.526(5) . ? 
CB_128 CG2_128 1.527(6) . ? 
CB_128 HB_128 1.0000 . ? 
CG1_128 HG1A_128 0.9800 . ? 
CG1_128 HG1B_128 0.9800 . ? 
CG1_128 HG1C_128 0.9800 . ? 
CG2_128 HG2A_128 0.9800 . ? 
CG2_128 HG2B_128 0.9800 . ? 
CG2_128 HG2C_128 0.9800 . ? 
C_128 O_128 1.239(5) . ? 
C_128 N_129 1.321(6) . ? 
N_129 CA_129 1.465(6) . ? 
N_129 H0_129 0.8800 . ? 
CA_129 C_129 1.504(6) . ? 
CA_129 CB_129 1.526(7) . ? 
CA_129 HA_129 1.0000 . ? 
CB_129 CG_129 1.553(11) . ? 
CB_129 HB1_129 0.9900 . ? 
CB_129 HB2_129 0.9900 . ? 
CG_129 CD_129 1.517(11) . ? 
CG_129 HG1_129 0.9900 . ? 
CG_129 HG2_129 0.9900 . ? 
CD_129 NE_129 1.521(16) . ? 
CD_129 HD1_129 0.9900 . ? 
CD_129 HD2_129 0.9900 . ? 
NE_129 CZ_129 1.277(15) . ? 
NE_129 HE_129 0.8800 . ? 
CZ_129 NH2_129 1.311(16) . ? 
CZ_129 NH1_129 1.354(18) . ? 
NH1_129 HH1A_129 0.8800 . ? 
NH1_129 HH1B_129 0.8800 . ? 
NH2_129 HH2A_129 0.8800 . ? 
NH2_129 HH2B_129 0.8800 . ? 
C_129 O_129 1.221(5) . ? 
C_129 N_130 1.357(6) . ? 
N_130 CA_130 1.454(5) . ? 
N_130 H0_130 0.8800 . ? 
CA_130 C_130 1.527(5) . ? 
CA_130 HA1_130 0.9900 . ? 
CA_130 HA2_130 0.9900 . ? 
C_130 O_130 1.242(5) . ? 
C_130 N_131 1.319(5) . ? 
N_131 CA_131 1.449(5) . ? 
N_131 H0_131 0.8800 . ? 
CA_131 C_131 1.528(5) . ? 
CA_131 CB_131 1.539(5) . ? 
CA_131 HA_131 1.0000 . ? 
CB_131 CG_131 1.530(6) . ? 
CB_131 HB1_131 0.9900 . ? 
CB_131 HB2_131 0.9900 . ? 
CG_131 CD1_131 1.516(6) . ? 
CG_131 CD2_131 1.529(6) . ? 
CG_131 HG_131 1.0000 . ? 
CD1_131 HD1A_131 0.9800 . ? 
CD1_131 HD1B_131 0.9800 . ? 
CD1_131 HD1C_131 0.9800 . ? 
CD2_131 HD2A_131 0.9800 . ? 
CD2_131 HD2B_131 0.9800 . ? 
CD2_131 HD2C_131 0.9800 . ? 
C_131 O_131 1.218(5) . ? 
C_131 N_132 1.341(4) . ? 
N_132 CA_132 1.444(5) . ? 
N_132 H0_132 0.8800 . ? 
CA_132 C_132 1.532(5) . ? 
CA_132 CB_132 1.534(5) . ? 
CA_132 HA_132 1.0000 . ? 
CB_132 OG1_132 1.431(4) . ? 
CB_132 CG2_132 1.512(5) . ? 
CB_132 HB_132 1.0000 . ? 
OG1_132 HG1_132 0.8400 . ? 
CG2_132 HG2A_132 0.9800 . ? 
CG2_132 HG2B_132 0.9800 . ? 
CG2_132 HG2C_132 0.9800 . ? 
C_132 O_132 1.247(4) . ? 
C_132 N_133 1.328(5) . ? 
N_133 CA_133 1.441(11) . ? 
N_133 CA_133 1.453(15) . ? 
N_133 H0_133 0.8800 . ? 
CA_133 C_133 1.522(11) . ? 
CA_133 CB_133 1.529(11) . ? 
CA_133 HA_133 1.0000 . ? 
CA_133 CB_133 1.519(16) . ? 
CA_133 C_133 1.530(15) . ? 
CA_133 HA1_133 1.0000 . ? 
CB_133 CG_133 1.533(12) . ? 
CB_133 HB1_133 0.9900 . ? 
CB_133 HB2_133 0.9900 . ? 
CB_133 CG_133 1.507(17) . ? 
CB_133 HB3_133 0.9900 . ? 
CB_133 HB4_133 0.9900 . ? 
CG_133 CD_133 1.523(11) . ? 
CG_133 HG1_133 0.9900 . ? 
CG_133 HG2_133 0.9900 . ? 
CG_133 CD_133 1.514(16) . ? 
CG_133 HG3_133 0.9900 . ? 
CG_133 HG4_133 0.9900 . ? 
CD_133 OE1_133 1.232(11) . ? 
CD_133 NE2_133 1.312(11) . ? 
CD_133 OE1_133 1.225(15) . ? 
CD_133 NE2_133 1.305(16) . ? 
NE2_133 HE2A_133 0.8800 . ? 
NE2_133 HE2B_133 0.8800 . ? 
NE2_133 HE2C_133 0.8800 . ? 
NE2_133 HE2D_133 0.8800 . ? 
C_133 O_133 1.247(5) . ? 
C_133 N_134 1.324(5) . ? 
N_134 CA_134 1.438(6) . ? 
N_134 H0_134 0.8800 . ? 
CA_134 C_134 1.513(6) . ? 
CA_134 HA1_134 0.9900 . ? 
CA_134 HA2_134 0.9900 . ? 
C_134 O_134 1.223(5) . ? 
C_134 N_135 1.351(6) . ? 
N_135 CA_135 1.456(6) . ? 
N_135 H0_135 0.8800 . ? 
CA_135 C_135 1.513(7) . ? 
CA_135 CB_135 1.532(7) . ? 
CA_135 HA_135 1.0000 . ? 
CB_135 CG_135 1.499(8) . ? 
CB_135 HB1_135 0.9900 . ? 
CB_135 HB2_135 0.9900 . ? 
CG_135 OD1_135 1.220(7) . ? 
CG_135 ND2_135 1.337(8) . ? 
ND2_135 HD2A_135 0.8800 . ? 
ND2_135 HD2B_135 0.8800 . ? 
C_135 O_135 1.231(5) . ? 
C_135 N_136 1.355(6) . ? 
N_136 CA_136 1.440(6) . ? 
N_136 H0_136 0.8800 . ? 
CA_136 CB_136 1.536(7) . ? 
CA_136 C_136 1.541(7) . ? 
CA_136 HA_136 1.0000 . ? 
CB_136 HB1_136 0.9800 . ? 
CB_136 HB2_136 0.9800 . ? 
CB_136 HB3_136 0.9800 . ? 
C_136 O_136 1.221(5) . ? 
C_136 N_137 1.327(6) . ? 
N_137 CA_137 1.446(8) . ? 
N_137 CA_137 1.455(18) . ? 
N_137 H0_137 0.8800 . ? 
C_137 O_137 1.232(4) . ? 
C_137 N_138 1.338(5) . ? 
C_137 CA_137 1.522(8) . ? 
C_137 CA_137 1.523(17) . ? 
CA_137 CB_137 1.509(8) . ? 
CA_137 HA_137 1.0000 . ? 
CA_137 CB_137 1.529(17) . ? 
CA_137 HA1_137 1.0000 . ? 
CB_137 SG_137 1.830(6) . ? 
CB_137 HB1_137 0.9900 . ? 
CB_137 HB2_137 0.9900 . ? 
CB_137 SG1_137 1.814(16) . ? 
CB_137 HB3_137 0.9900 . ? 
CB_137 HB4_137 0.9900 . ? 
SG_137 SG_170 2.051(4) . ? 
N_138 CA_138 1.445(18) . ? 
N_138 CA_138 1.449(7) . ? 
N_138 CA_138 1.454(19) . ? 
N_138 H0_138 0.8800 . ? 
CA_138 C_138 1.530(7) . ? 
CA_138 CB_138 1.535(8) . ? 
CA_138 HA_138 1.0000 . ? 
CA_138 C_138 1.519(17) . ? 
CA_138 CB_138 1.533(18) . ? 
CA_138 HA1_138 1.0000 . ? 
CA_138 C_138 1.518(17) . ? 
CA_138 CB_138 1.540(18) . ? 
CA_138 HA2_138 1.0000 . ? 
CB_138 CG_138 1.527(10) . ? 
CB_138 HB1_138 0.9900 . ? 
CB_138 HB2_138 0.9900 . ? 
CB_138 CG_138 1.53(2) . ? 
CB_138 HB3_138 0.9900 . ? 
CB_138 HB4_138 0.9900 . ? 
CB_138 CG_138 1.520(19) . ? 
CB_138 HB5_138 0.9900 . ? 
CB_138 HB6_138 0.9900 . ? 
CG_138 SD_138 1.790(10) . ? 
CG_138 HG1_138 0.9900 . ? 
CG_138 HG2_138 0.9900 . ? 
CG_138 SD_138 1.827(17) . ? 
CG_138 HG3_138 0.9900 . ? 
CG_138 HG4_138 0.9900 . ? 
CG_138 SD_138 1.788(18) . ? 
CG_138 HG5_138 0.9900 . ? 
CG_138 HG6_138 0.9900 . ? 
SD_138 CE_138 1.705(16) . ? 
SD_138 CE_138 1.562(14) . ? 
SD_138 CE_138 1.735(18) . ? 
CE_138 HE1_138 0.9800 . ? 
CE_138 HE2_138 0.9800 . ? 
CE_138 HE3_138 0.9800 . ? 
CE_138 HE4_138 0.9800 . ? 
CE_138 HE5_138 0.9800 . ? 
CE_138 HE6_138 0.9800 . ? 
CE_138 HE7_138 0.9800 . ? 
CE_138 HE8_138 0.9800 . ? 
CE_138 HE9_138 0.9800 . ? 
C_138 O_138 1.227(4) . ? 
C_138 N_139 1.330(5) . ? 
N_139 CA_139 1.455(5) . ? 
N_139 H0_139 0.8800 . ? 
CA_139 C_139 1.498(6) . ? 
CA_139 HA1_139 0.9900 . ? 
CA_139 HA2_139 0.9900 . ? 
C_139 O_139 1.238(5) . ? 
C_139 N_140 1.29(3) . ? 
C_139 N_140 1.32(4) . ? 
C_139 N_140 1.33(5) . ? 
C_139 N_140 1.42(2) . ? 
N_140 CA_140 1.446(15) . ? 
N_140 H0_140 0.8800 . ? 
N_140 CA_140 1.449(18) . ? 
N_140 H0A_140 0.8800 . ? 
N_140 CA_140 1.465(16) . ? 
N_140 H0B_140 0.8800 . ? 
N_140 CA_140 1.459(17) . ? 
N_140 H0C_140 0.8800 . ? 
C_140 O_140 1.233(15) . ? 
C_140 N_141 1.33(3) . ? 
C_140 CA_140 1.514(14) . ? 
C_140 O_140 1.23(2) . ? 
C_140 N_141 1.31(4) . ? 
C_140 CA_140 1.531(18) . ? 
C_140 O_140 1.236(17) . ? 
C_140 N_141 1.32(3) . ? 
C_140 CA_140 1.522(17) . ? 
C_140 O_140 1.232(17) . ? 
C_140 N_141 1.38(2) . ? 
C_140 CA_140 1.515(16) . ? 
CA_140 CB_140 1.542(12) . ? 
CA_140 HA_140 1.0000 . ? 
CA_140 CB_140 1.529(17) . ? 
CA_140 HA1_140 1.0000 . ? 
CA_140 CB_140 1.529(17) . ? 
CA_140 HA2_140 1.0000 . ? 
CA_140 CB_140 1.541(16) . ? 
CA_140 HA3_140 1.0000 . ? 
CB_140 CG_140 1.515(14) . ? 
CB_140 HB1_140 0.9900 . ? 
CB_140 HB2_140 0.9900 . ? 
CB_140 CG_140 1.511(18) . ? 
CB_140 HB3_140 0.9900 . ? 
CB_140 HB4_140 0.9900 . ? 
CB_140 CG_140 1.515(18) . ? 
CB_140 HB5_140 0.9900 . ? 
CB_140 HB6_140 0.9900 . ? 
CB_140 CG_140 1.515(18) . ? 
CB_140 HB7_140 0.9900 . ? 
CB_140 HB8_140 0.9900 . ? 
CG_140 CD_140 1.513(11) . ? 
CG_140 HG1_140 0.9900 . ? 
CG_140 HG2_140 0.9900 . ? 
CG_140 CD_140 1.521(19) . ? 
CG_140 HG3_140 0.9900 . ? 
CG_140 HG4_140 0.9900 . ? 
CG_140 CD_140 1.521(19) . ? 
CG_140 HG5_140 0.9900 . ? 
CG_140 HG6_140 0.9900 . ? 
CG_140 CD_140 1.517(15) . ? 
CG_140 HG7_140 0.9900 . ? 
CG_140 HG8_140 0.9900 . ? 
CD_140 NE_140 1.456(11) . ? 
CD_140 HD1_140 0.9900 . ? 
CD_140 HD2_140 0.9900 . ? 
CD_140 NE_140 1.447(17) . ? 
CD_140 HD3_140 0.9900 . ? 
CD_140 HD4_140 0.9900 . ? 
CD_140 NE_140 1.402(18) . ? 
CD_140 HD5_140 0.9900 . ?
[truncated: 232,598 more chars]
